# Supplementary material for: Rh2(ii)-catalyzed enantioselective intramolecular Büchner reaction and aromatic substitution of donor–donor carbenes
Source: PubMed Central journal article supplement — Chem Sci. 2022 Jan 19;13(7):1992–2000. doi: 10.1039/d1sc05374d (PMC8848862; doi:10.1039/d1sc05374d), 2022-01-19
Supplement: SC-013-D1SC05374D-s001.pdf [file SC-013-D1SC05374D-s001.pdf]

## Supporting Information

# Rh<sub>2</sub>(II)-Catalyzed Enantioselective Intramolecular Büchner Reaction and Aromatic Substitution of Donor-Donor Carbenes

Dong Zhu,<sup>a</sup> Tongxiang Cao,<sup>a</sup> Kai Chen,<sup>\*,b</sup> and Shifa Zhu<sup>\*,a,c</sup>

<sup>a</sup>Key Laboratory of Functional Molecular Engineering of Guangdong Province, School of Chemistry and Chemical Engineering, South China University of Technology, Guangzhou, 510640, P. R. China.

<sup>b</sup>College of Chemistry and Chemical Engineering, Central South University, Changsha, 410083, P. R. China.

<sup>c</sup>State Key Laboratory of Elemento-Organic Chemistry, Nankai University, Tianjin, 300071, P.R. China.

|                                                                                                        |     |
|--------------------------------------------------------------------------------------------------------|-----|
| 1. General information.....                                                                            | 2   |
| 2. Table S1. Optimization of Büchner reaction conditions.....                                          | 3   |
| 3. Table S2. Optimization of aromatic substitution conditions.....                                     | 4   |
| 4. General procedure for preparation of enynones.....                                                  | 5   |
| 5. General procedure for Büchner reaction.....                                                         | 18  |
| 6. Table S3. racemization control experiments of <b>2c</b> .....                                       | 24  |
| 7. Table S4. the racemization of 7-substituted products.....                                           | 25  |
| 8. Scheme S3. the racemization of product <b>2o</b> with room temperature and dark condition.....      | 25  |
| 9. Scheme S4. The decomposition of product <b>2o</b> was monitored by <sup>1</sup> H NMR spectrum..... | 26  |
| 10. Trap of free carbene intermediate with <b>2c</b> and alkenes.....                                  | 27  |
| 11. Trap of radical intermediate with <b>2o</b> and TEMPO.....                                         | 27  |
| 12. General procedure for Büchner reaction with donor-donor diazo compounds as carbene precursors..... | 28  |
| 13. The racemization of product <b>4h</b> at room temperature.....                                     | 31  |
| 14. General procedure for aromatic substitution reaction.....                                          | 31  |
| 15. [4+2] cycloaddition of cycloheptatriene <b>4</b> with PTAD.....                                    | 36  |
| 16. Hydrogenation of cycloheptatriene <b>4c</b> .....                                                  | 37  |
| 17. Computational details.....                                                                         | 38  |
| 18. References.....                                                                                    | 71  |
| 19. Spectrum of NMR.....                                                                               | 72  |
| 20. Data of HPLC.....                                                                                  | 169 |

## 1. General information.

All reactions were conducted under dry N<sub>2</sub> atmosphere in schlenk tube. Catalysts were commercial available. Commercially obtained reagents were used without purification. Reaction starting materials were prepared as depicted in the literature.

<sup>1</sup>H, <sup>13</sup>C NMR spectra were recorded on a Bruker AVANCE 400 (400 MHz for <sup>1</sup>H; 100 MHz for <sup>13</sup>C) and Bruker AVANCE 500 (500 MHz for <sup>1</sup>H; 126 MHz for <sup>13</sup>C), <sup>1</sup>H NMR and <sup>13</sup>C NMR chemical shifts were determined relative to internal standard TMS at δ 0.0. Chemical shifts (δ) are reported in ppm, and coupling constants (*J*) are in Hertz(Hz). The following abbreviations were used to explain the multiplicities: s = singlet, d =doublet, t = triplet, q = quartet, m = multiplet, br = broad. Infrared (IR) spectra are recorded on a Nicolet 210 spectrophotometer and were recorded in potassium bromide (KBr) pellet. Mass spectra (MS) were obtained using ESI mass spectrometer. Enantiomeric ratios were determined by HPLC, using a chiralcel OD-H column with hexane and *i*-PrOH as solvents.

2. Table S1. Optimization of Büchner reaction conditions.<sup>[a]</sup>

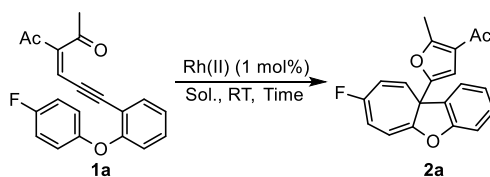

| Entry                   | Rh(II)                                     | Sol.              | Time        | Yield (%) <sup>[b]</sup> | ee (%) <sup>[c]</sup> |
|-------------------------|--------------------------------------------|-------------------|-------------|--------------------------|-----------------------|
| 1                       | Rh <sub>2</sub> (Opiv) <sub>4</sub>        | DCM               | 3 h         | 94                       | -                     |
| 2                       | Rh <sub>2</sub> (5S-MEPY) <sub>4</sub>     | DCM               | 4 h         | trace                    | -                     |
| 3                       | Rh <sub>2</sub> (R-DOSP) <sub>4</sub>      | DCM               | 4 h         | 99                       | racemic               |
| 4                       | Rh <sub>2</sub> (S-PTTL) <sub>4</sub>      | DCM               | 12 h        | 97                       | 6                     |
| 5                       | Rh <sub>2</sub> (S-PTAD) <sub>4</sub>      | DCM               | 12 h        | 91                       | 29                    |
| 6                       | Rh <sub>2</sub> (S-TFPTTL) <sub>4</sub>    | DCM               | 4 h         | 99                       | -20                   |
| 7                       | Rh <sub>2</sub> (S-TCPTTL) <sub>4</sub>    | DCM               | 4 h         | 99                       | 73                    |
| 8                       | Rh <sub>2</sub> (S-BTPCP) <sub>4</sub>     | DCM               | 2 h         | 99                       | 83                    |
| 9                       | Rh <sub>2</sub> (S-BTPCP) <sub>4</sub>     | Toluene           | 4 h         | 99                       | 60                    |
| 10                      | Rh <sub>2</sub> (S-BTPCP) <sub>4</sub>     | CHCl <sub>3</sub> | 8 h         | 99                       | 70                    |
| 11                      | Rh <sub>2</sub> (S-BTPCP) <sub>4</sub>     | DCE               | 2 h         | 99                       | 92                    |
| <b>12<sup>[d]</sup></b> | <b>Rh<sub>2</sub>(S-BTPCP)<sub>4</sub></b> | <b>DCE</b>        | <b>30 h</b> | <b>99</b>                | <b>96</b>             |
| 13 <sup>[e]</sup>       | Rh <sub>2</sub> (S-BTPCP) <sub>4</sub>     | DCE               | 53 h        | 99                       | 96                    |

[a] The reaction was performed in DCE under N<sub>2</sub>, **1a** = 0.2 mmol, [**1a**] = 0.1 M, 1 mol% Rh(II). [b] isolated yield. [c] The ee value of **2a** was determined by HPLC using a chiral stationary phase. [d] -20 °C. [e] -20 °C, 0.5 mol% Rh<sub>2</sub>(S-BTPCP)<sub>4</sub>.

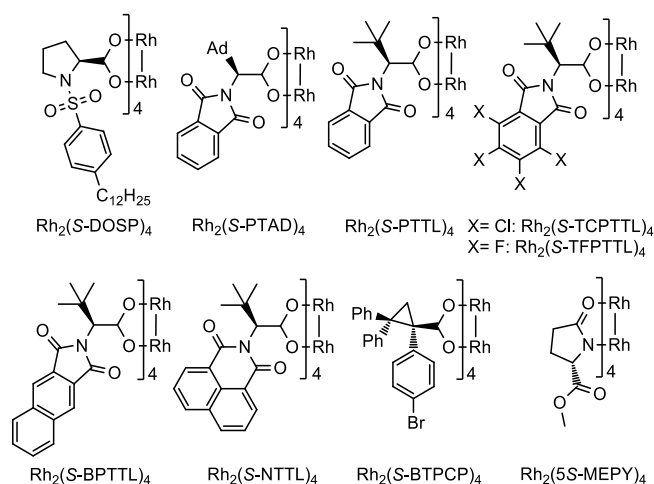

### 3. Table S2. Optimization of aromatic substitution conditions.<sup>a</sup>

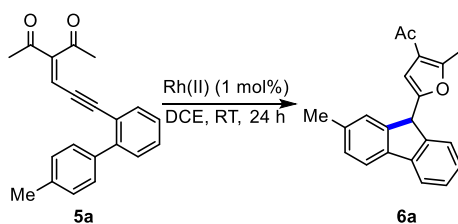

| Entry          | Rh(II)                                     | Sol.              | Time        | Yield <sup>b</sup> (%) | ee <sup>c</sup> (%) |
|----------------|--------------------------------------------|-------------------|-------------|------------------------|---------------------|
| 1              | Rh <sub>2</sub> (OPiv) <sub>4</sub>        | DCE               | 12 h        | 95%                    | -                   |
| 2 <sup>d</sup> | ZnI <sub>2</sub>                           | DCE               | 3 h         | 99%                    | -                   |
| 3              | Rh <sub>2</sub> (S-DOSP) <sub>4</sub>      | DCE               | 12 h        | 99                     | -35                 |
| 4              | Rh <sub>2</sub> (S-PTAD) <sub>4</sub>      | DCE               | 24 h        | 99                     | 52                  |
| 5              | Rh <sub>2</sub> (S-PTTL) <sub>4</sub>      | DCE               | 12 h        | 99                     | 91                  |
| 6              | Rh <sub>2</sub> (S-TCPTTL) <sub>4</sub>    | DCE               | 12 h        | 57                     | 53                  |
| 7              | Rh <sub>2</sub> (S-TFPTTL) <sub>4</sub>    | DCE               | 12 h        | 20                     | 35                  |
| 8              | Rh <sub>2</sub> (S-BPTTL) <sub>4</sub>     | DCE               | 48 h        | 67                     | 70                  |
| 9              | Rh <sub>2</sub> (S-NTTL) <sub>4</sub>      | DCE               | 48 h        | 94                     | 86                  |
| 10             | Rh <sub>2</sub> (5S-MEPY) <sub>4</sub>     | DCE               | 24 h        | N.R.                   | -                   |
| 11             | Rh <sub>2</sub> (S-BTPCP) <sub>4</sub>     | DCE               | 24 h        | 93                     | 96                  |
| <b>12</b>      | <b>Rh<sub>2</sub>(S-BTPCP)<sub>4</sub></b> | <b>DCM</b>        | <b>24 h</b> | <b>95</b>              | <b>97</b>           |
| 13             | Rh <sub>2</sub> (S-BTPCP) <sub>4</sub>     | Toluene           | 24 h        | 33                     | 60                  |
| 14             | Rh <sub>2</sub> (S-BTPCP) <sub>4</sub>     | CHCl <sub>3</sub> | 24 h        | 80                     | 92                  |

[a] The reaction was performed in DCE under N<sub>2</sub>, **1a** = 0.2 mmol, [**1a**] = 0.1 M, [b] isolated yield. [c] The ee value of **2a** was determined by HPLC using a chiral stationary phase. [d] ZnI<sub>2</sub>: 10 mol%.

#### 4. General procedure for preparation of enynes.

##### Scheme S1. general procedure for preparation of *N*-allyl enynes **1a – 1p**.

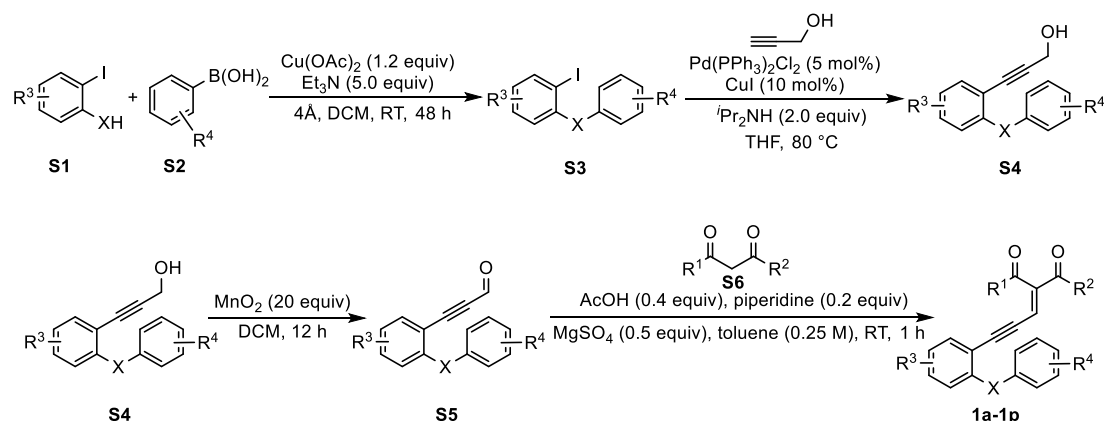

##### Typical procedure for preparation of **S3**<sup>[1]</sup>

A mixture of 2-iodophenol or *N*-methyl-2-iodoaniline **S1** (5 mmol), arylboronic acid **S2** (7.5 mmol, 1.5 equiv), anhydrous  $\text{Cu}(\text{OAc})_2$  (6 mmol, 1.2 equiv, 1.09 g), triethylamine (25 mmol, 5.0 equiv, 3.5 mL) and powdered 4Å molecular sieves (1.0 g) in anhydrous DCM (40 mL) was stirred at room temperature for 48 h. The reaction was monitored by TLC and then the reaction mixture was filtered through a plug of silica gel and the filtrate was concentrated in vacuo. Purification by silica gel chromatography (petroleum ether) afforded chromatographically and spectroscopically pure product **S3**.

##### Typical procedure for preparation of **S5**<sup>[2]</sup>

Under nitrogen atmosphere, a mixture of **S3** (3 mmol, 1.0 eq.),  $\text{CuI}$  (10 mol%),  $\text{Pd}(\text{PPh}_3)_2\text{Cl}_2$  (5 mol%) were added to a schlenk tube,  $^i\text{Pr}_2\text{NH}$  (2.0 equiv) and THF (12 mL) as co-solvent was added to the reaction mixture, then propargyl alcohol (6 mmol, 2.0 eq) was added slowly. The reaction was stirred for 12 h at 80 °C. The mixture was diluted with  $\text{H}_2\text{O}$ , and extracted with  $\text{CH}_2\text{Cl}_2$ . The extract was dried over  $\text{MgSO}_4$  and evaporated under reduced pressure. The residue was purified by chromatography on silica gel with petroleum ether/ethyl acetate (5:1) as the eluent to afford **S4**.

To a solution of **S4** (2.0 mmol, 1.0 eq.) in DCM (0.5 M) at room temperature was added  $\text{MnO}_2$  (20 eq.). The resulting mixture was stirred overnight and monitored by TLC. After **S4** was completely consumed, filtered and concentrated under reduced pressure. Purification of the crude product by flash column chromatography (silica gel, petroleum ether/ $\text{AcOEt}$  = 10:1) gave **S5**.

##### Typical procedure for preparation of enynes **1a – 1p**<sup>[2]</sup>

**S5** (1.0 eq),  $\text{AcOH}$  (0.4 eq.), piperidine (0.2 eq.) and  $\text{MgSO}_4$  (0.5 eq.) were added to a solution of **S6** (1.2 eq) in toluene at room temperature. The reaction was stirred at room temperature and monitored by TLC for 1 h. The reaction mixture was extracted with ethyl acetate and water. Combined organic layers were washed with brine and dried over  $\text{MgSO}_4$ . Filtered and concentrated under reduced pressure. The resulting residue was purified by flash column chromatography (silica gel, petroleum ether/ $\text{AcOEt}$  = 10:1) to yield **1a – 1p**.

##### General procedure for preparation of Donor-Donor hydrazones **S15a-S15i**.

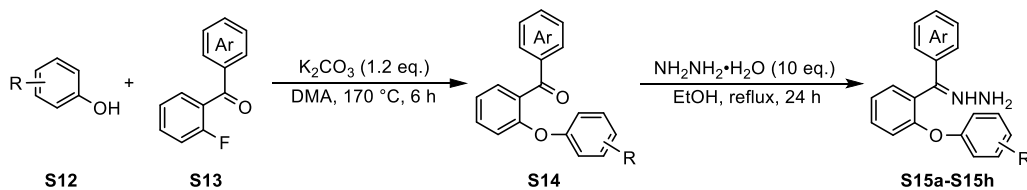

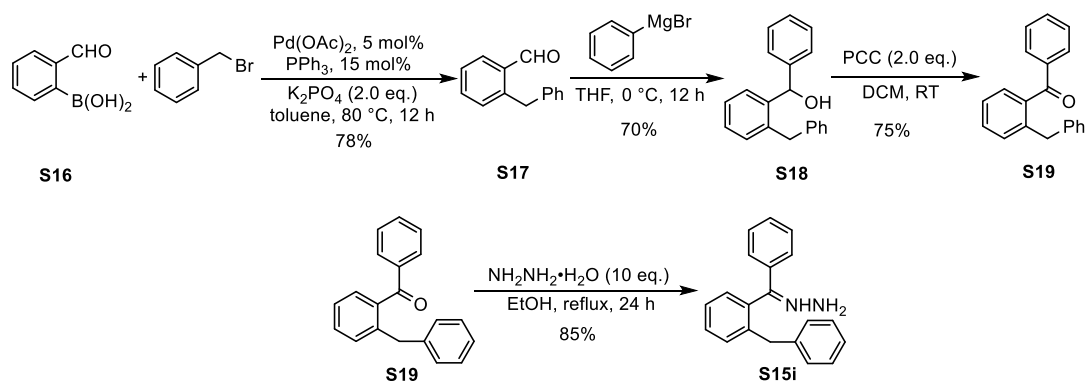

#### Typical procedure for preparation of S14<sup>[4]</sup>

To a solution of 2-Fluorobenzophenone **S13** (5.00 mmol, 1.0 equiv) in DMA (10 mL), phenol **S12** (6 mmol, 1.2 equiv) and anhydrous K<sub>2</sub>CO<sub>3</sub> (6 mmol, 828 mg, 1.2 equiv) were added. The resulting mixture was stirred and slowly heated to 170 °C. After reacted for 6 h and cooling to room temperature the reaction mixture was poured into H<sub>2</sub>O (20 mL) and the aqueous layer was extracted with DCM (3×20 mL). After drying over Na<sub>2</sub>SO<sub>4</sub>, filtration and concentration in vacuo, the desired 2-phenoxybenzophenone **S14** was obtained through flash column chromatography (silica gel, petroleum ether/AcOEt = 30:1).

#### Typical procedure for preparation of hydrazones S15a-S15h<sup>[5]</sup>

To a 25 mL Schlenk tube containing a magnetic stirring bar and compound 2-phenoxybenzophenone **S14** (4.0 mmol) in ethanol (10 ml), was added N<sub>2</sub>H<sub>4</sub>·H<sub>2</sub>O (2.0 g, 40 mmol). The solution was stirred under refluxing for 24 hours, the solvent was evaporated under reduced pressure and the resulting crude product extracted with ethyl acetate (3×15 mL). The combined organic layers were dried over Na<sub>2</sub>SO<sub>4</sub>, filtration and concentration in vacuo, the desired hydrazones **S15a-S15h** was obtained through flash column chromatography (silica gel, petroleum ether/AcOEt = 10:1).

#### Typical procedure for preparation of S17<sup>[6]</sup>

To a 50 mL Schlenk tube containing a magnetic stirring bar, a solution of benzyl bromide (10.0 mmol, 1.7 g, 1.0 equiv) in toluene (20 mL) were added Pd(OAc)<sub>2</sub> (112 mg, 5 mol%), PPh<sub>3</sub> (393 mg, 15 mol%), K<sub>3</sub>PO<sub>4</sub> (4.2 g, 2.0 equiv) and 2-formylbenzeneboronic acid **S16** (1.8 g, 1.2 equiv). After stirring at 80 °C for 12 h, the reaction mixture was filtered through a pad of silica gel. Concentrated in vacuo, the desired 2-benzylbenzaldehyde **S17** was obtained through flash column chromatography (silica gel, petroleum ether/AcOEt = 50:1).

#### Typical procedure for preparation of S18

To a 50 mL Schlenk tube containing a magnetic stirring bar, a solution of 2-benzylbenzaldehyde **S17** (8.0 mmol) in THF (10 mL) was added under 0 °C. Phenylmagnesium bromide (1.5 equiv) in 10 mL THF was added dropwise. The reaction was stirred under 0 °C for 12 h. Upon completion, the saturated NH<sub>4</sub>Cl (20 mL) was added to quench the reaction, the resulting solution was extracted with EtOAc (20 mL×3). The combined organic layers were dried over Na<sub>2</sub>SO<sub>4</sub>, filtration and concentration in vacuo, the desired product **S18** was obtained through flash column chromatography (silica gel, petroleum ether/AcOEt = 5:1).

#### Typical procedure for preparation of S19

To a solution of **S18** (5.0 mmol, 1.0 eq.) in DCM (0.1 M) at room temperature was added PCC (2.0 equiv). The resulting mixture was stirred and monitored by TLC. After **S18** was completely consumed, filtered and concentrated under reduced pressure. the desired product **S19** was obtained through flash column chromatography (silica gel, petroleum ether/AcOEt = 20:1).

#### Typical procedure for preparation of hydrazones S15i

The desired hydrazones **S15i** was obtained through the corresponding procedure for the synthesis of hydrazones **S15a-S15h**.

**Scheme S2. general procedure for preparation of *N*-allyl enynones **5a–5l**.**

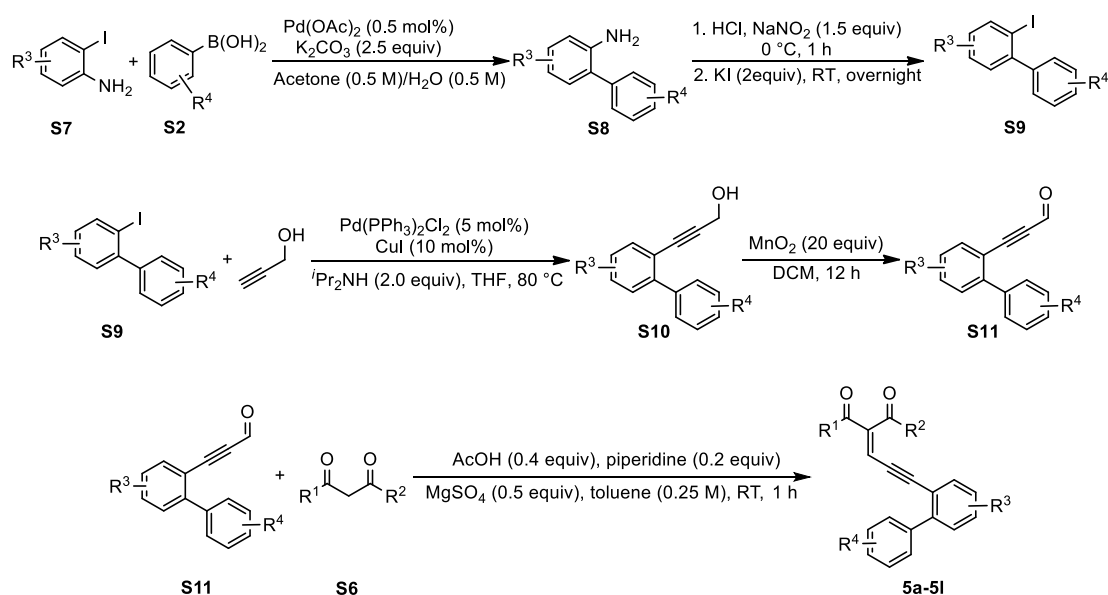

**Typical procedure for preparation of **S9**<sup>[3]</sup>.**

To a solution of substituted 2-iodoaniline **S7** (5.0 mmol) in acetone (8 mL) and water (10 mL) was added substituted phenylboronic acid **S2** (6.0 mmol, 1.2 equiv), and  $\text{K}_2\text{CO}_3$  (1.73 g, 12.5 mmol, 2.5 equiv). A solution of  $\text{Pd}(\text{OAc})_2$  (5.6 mg, 0.025 mmol, 0.5 mol %) in acetone (2.0 mL) was then introduced to the reaction mixture via a syringe. After the reaction mixture was stirred at  $70^\circ\text{C}$  overnight, it was allowed to cool to room temperature. The reaction mixture was extracted with EtOAc ( $3 \times 20$  mL), and the combined organic phases were washed with 50 mL of water. The organic phases were dried over anhydrous  $\text{Na}_2\text{SO}_4$ , and concentrated in vacuo. The crude product was purified by silica gel column chromatography (petroleum ether) to give the corresponding substituted 2-aminobiphenyls **S8**.

A solution of concn. HCl (36–38%; 2.3 mL, 6.5 mmol) in water (8.5 mL) was added slowly to the prepared 2-aminobiphenyl **S8** (5.0 mmol) with stirring. An aqueous solution of  $\text{NaNO}_2$  (20%; 2.59 g, 7.5 mmol) was added to the reaction mixture at  $0^\circ\text{C}$  within 10 min and stirred for 1 h at the same temperature. An aqueous solution of KI (1.66 g, 10.0 mmol) in water (10.0 mL) was added and the reaction mixture was stirred at room temperature overnight. EtOAc (30 mL) was added to the reaction mixture and the organic phase was treated with saturated  $\text{NaHSO}_3$  to decolorize. The aqueous phase was extracted with EtOAc ( $3 \times 20$  mL). The combined organic phases were dried over anhydrous  $\text{Na}_2\text{SO}_4$  and concentrated in vacuo. The crude product was purified by silica gel column chromatography (petroleum ether unless otherwise noted) to give the desired 2-iodobiphenyls **S9**.

**Typical procedure for preparation of enynones **5a–5l****

The procedure for the synthesis of enynones **5a–5l** from **S9** was similar with the synthesis of **1a–1p** from **S3** described above.

**3-(3-(2-(4-Fluorophenoxy)phenyl)prop-2-yn-1-ylidene)pentane-2,4-dione (**1a**)** Yield: 65%, yellow oil,  $R_f = 0.3$  (petroleum ether/AcOEt = 10:1).  $^1\text{H}$  NMR (400 MHz,  $\text{CDCl}_3$ )  $\delta$  7.51 (d,  $J = 7.7$  Hz, 1H), 7.36 – 7.30 (m, 1H), 7.12 – 7.02 (m, 3H), 7.01 – 6.96 (m, 2H), 6.95 (d,  $J = 1.9$  Hz, 1H), 6.81 (d,  $J = 8.4$  Hz, 1H), 2.51 (s, 3H), 2.33 (s, 3H).  $^{19}\text{F}$  NMR (376 MHz,  $\text{CDCl}_3$ )  $\delta$  -118.9.  $^{13}\text{C}$  NMR (101 MHz,  $\text{CDCl}_3$ )  $\delta$  200.9, 195.6, 159.2 (d,  $J = 242.8$  Hz), 158.8, 152.0 (d,  $J = 2.6$  Hz), 149.1, 134.1, 131.7, 123.2, 122.2, 120.7 (d,  $J = 8.4$

(Hz), 117.3, 116.5 (d, J = 23.5 Hz), 113.3, 103.0, 89.7, 31.0, 27.6. IR (KBr, cm<sup>-1</sup>) 3065, 2954, 1711, 1686, 1570, 1500, 1447, 1365, 1214, 1092, 952, 847, 758. HRMS (ESI) ([M+H]<sup>+</sup>) Calcd. for [C<sub>20</sub>H<sub>16</sub>FO<sub>3</sub>]<sup>+</sup>: 323.1078, Found. 323.1081.

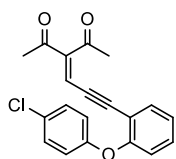

**3-(3-(2-(4-Chlorophenoxy)phenyl)prop-2-yn-1-ylidene)pentane-2,4-dione (1b)** Yield: 63%, yellow

oil, R<sub>f</sub> = 0.3 (petroleum ether/AcOEt = 10:1). <sup>1</sup>H NMR (400 MHz, CDCl<sub>3</sub>) δ 7.52 (d, J = 7.7 Hz, 1H), 7.39 – 7.28 (m, 3H), 7.13 (t, J = 7.7 Hz, 1H), 6.97 – 6.85 (m, 4H), 2.48 (s, 3H), 2.33 (s, 3H). <sup>13</sup>C NMR (101 MHz, CDCl<sub>3</sub>) δ 200.8, 195.5, 158.0, 155.1, 149.2, 134.2, 131.8, 129.9, 129.0, 123.7, 122.1, 120.1,

118.3, 113.9, 102.7, 89.7, 30.9, 27.6. IR (KBr, cm<sup>-1</sup>) 3031, 1711, 1570, 1482, 1445, 1363, 1236, 1168, 956, 872, 760.

HRMS (ESI) ([M+H]<sup>+</sup>) Calcd. for [C<sub>20</sub>H<sub>16</sub>ClO<sub>3</sub>]<sup>+</sup>: 339.0782, Found. 339.0784.

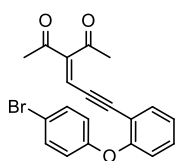

**3-(3-(2-(4-Bromophenoxy)phenyl)prop-2-yn-1-ylidene)pentane-2,4-dione (1c)** Yield: 62%, yellow

oil, R<sub>f</sub> = 0.3 (petroleum ether/AcOEt = 10:1). <sup>1</sup>H NMR (400 MHz, CDCl<sub>3</sub>) δ 7.52 (dd, J = 7.8, 1.9 Hz, 1H), 7.48 – 7.42 (m, 2H), 7.39 – 7.32 (m, 1H), 7.13 (t, J = 7.6 Hz, 1H), 6.93 – 6.85 (m, 4H), 2.47 (s, 3H), 2.33 (s, 3H). <sup>13</sup>C NMR (101 MHz, CDCl<sub>3</sub>) δ 200.8, 195.5, 157.8, 155.7, 149.2, 134.2, 132.9, 131.8,

123.8, 122.0, 120.5, 118.4, 116.5, 114.0, 102.6, 89.7, 30.9, 27.6. IR (KBr, cm<sup>-1</sup>) 3031, 1711, 1693, 1571, 1480, 1444, 1367,

1233, 1170, 1066, 957, 871, 760. HRMS (ESI) ([M+H]<sup>+</sup>) Calcd. for [C<sub>20</sub>H<sub>16</sub>BrO<sub>3</sub>]<sup>+</sup>: 383.0277, Found. 383.0279.

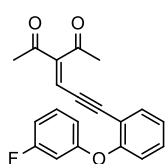

**3-(3-(2-(3-Fluorophenoxy)phenyl)prop-2-yn-1-ylidene)pentane-2,4-dione (1d)** Yield: 55%, yellow

oil, R<sub>f</sub> = 0.3 (petroleum ether/AcOEt = 10:1). <sup>1</sup>H NMR (400 MHz, CDCl<sub>3</sub>) δ 7.56 – 7.50 (m, 1H), 7.42 – 7.35 (m, 1H), 7.32 – 7.26 (m, 1H), 7.19 – 7.13 (m, 1H), 6.95 (dd, J = 8.4, 2.4 Hz, 1H), 6.90 (s, 1H), 6.84 (t, J = 8.6 Hz, 1H), 6.78 (d, J = 8.5 Hz, 1H), 6.72 – 6.67 (m, 1H), 2.47 (s, 3H), 2.32 (s, 3H). <sup>19</sup>F NMR (376 MHz, CDCl<sub>3</sub>) δ -110.5. <sup>13</sup>C NMR (101 MHz, CDCl<sub>3</sub>) δ 200.8, 195.6, 163.5 (d, J = 247.2 Hz), 158.0 (d, J = 10.5 Hz),

157.4, 149.1, 134.2, 131.8, 130.7 (d, J = 9.6 Hz), 124.1, 122.0, 119.1, 114.3, 114.1 (d, J = 3.0 Hz), 110.6 (d, J = 21.1 Hz),

106.2 (d, J = 24.6 Hz), 102.5, 89.7, 30.9, 27.6. IR (KBr, cm<sup>-1</sup>) 3031, 1711, 1572, 1482, 1444, 1367, 1244, 1124, 959, 865,

771. HRMS (ESI) ([M+Na]<sup>+</sup>) Calcd. for [C<sub>20</sub>H<sub>15</sub>FN<sub>3</sub>O<sub>3</sub>]<sup>+</sup>: 345.0897, Found. 345.0901.

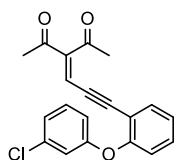

**3-(3-(2-(3-Chlorophenoxy)phenyl)prop-2-yn-1-ylidene)pentane-2,4-dione (1e)** Yield: 57%, yellow

oil, R<sub>f</sub> = 0.3 (petroleum ether/AcOEt = 10:1). <sup>1</sup>H NMR (400 MHz, CDCl<sub>3</sub>) δ 7.53 (d, J = 7.3 Hz, 1H), 7.38 (t, J = 8.1 Hz, 1H), 7.31 – 7.24 (m, 1H), 7.19 – 7.08 (m, 2H), 6.97 (s, 1H), 6.95 – 6.85 (m, 3H), 2.47 (s, 3H), 2.33 (s, 3H). <sup>13</sup>C NMR (101 MHz, CDCl<sub>3</sub>) δ 200.8, 195.6, 157.4, 157.4, 149.2, 135.2,

134.3, 131.8, 130.7, 124.1, 123.9, 122.0, 119.0, 118.9, 116.8, 114.3, 102.5, 89.7, 30.9, 27.6. IR (KBr, cm<sup>-1</sup>) 3029, 1712,

1577, 1473, 1443, 1361, 1231, 1108, 952, 908, 768. HRMS (ESI) ([M+Na]<sup>+</sup>) Calcd. for [C<sub>20</sub>H<sub>15</sub>ClNaO<sub>3</sub>]<sup>+</sup>: 361.0602, Found.

361.0602.



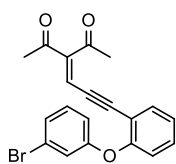

**3-(3-(2-(3-Bromophenoxy)phenyl)prop-2-yn-1-ylidene)pentane-2,4-dione (1f)** Yield: 57%, yellow

oil,  $R_f = 0.3$  (petroleum ether/AcOEt = 10:1).  $^1\text{H NMR}$  (400 MHz,  $\text{CDCl}_3$ )  $\delta$  7.53 (d,  $J = 7.3$  Hz, 1H),

7.38 (t,  $J = 7.9$  Hz, 1H), 7.30 – 7.19 (m, 2H), 7.18 – 7.09 (m, 2H), 6.91 (dd,  $J = 11.8, 5.3$  Hz, 3H), 2.47

(s, 3H), 2.33 (s, 3H).  $^{13}\text{C NMR}$  (101 MHz,  $\text{CDCl}_3$ )  $\delta$  200.8, 195.6, 157.5, 157.4, 149.2, 134.3, 131.8,

131.0, 126.9, 124.1, 123.0, 122.0, 121.8, 119.0, 117.3, 114.2, 102.5, 89.8, 31.0, 27.6. IR (KBr,  $\text{cm}^{-1}$ ) 3029, 1712, 1576,

1469, 1445, 1363, 1229, 1109, 953, 896, 765. HRMS (ESI) ( $[\text{M}+\text{Na}]^+$ ) Calcd. for  $[\text{C}_{20}\text{H}_{15}\text{BrNaO}_3]^+$ : 405.0097, Found.

405.0091.

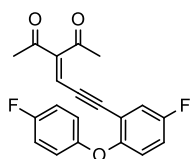

**3-(3-(5-Fluoro-2-(4-fluorophenoxy)phenyl)prop-2-yn-1-ylidene)pentane-2,4-dione (1g)** Yield:

53%, yellow oil,  $R_f = 0.3$  (petroleum ether/AcOEt = 10:1).  $^1\text{H NMR}$  (500 MHz,  $\text{CDCl}_3$ )  $\delta$  7.20 (dd,  $J$

= 8.2, 3.1 Hz, 1H), 7.05 (dd,  $J = 9.3, 7.7$  Hz, 3H), 6.95 (dd,  $J = 9.1, 4.4$  Hz, 2H), 6.89 (s, 1H), 6.81 (dd,

$J = 9.1, 4.6$  Hz, 1H), 2.47 (s, 3H), 2.34 (s, 3H).  $^{19}\text{F NMR}$  (471 MHz,  $\text{CDCl}_3$ )  $\delta$  -119.0, -119.1.  $^{13}\text{C}$

NMR (126 MHz,  $\text{CDCl}_3$ )  $\delta$  200.7, 195.4, 159.1 (d,  $J = 242.7$  Hz), 157.9 (d,  $J = 244.1$  Hz), 154.8 (d,  $J = 2.6$  Hz), 152.5 (d,

$J = 2.6$  Hz), 149.7, 121.4, 120.1 (d,  $J = 8.3$  Hz), 120.0 (d,  $J = 24.7$  Hz), 119.3 (d,  $J = 8.6$  Hz), 118.7 (d,  $J = 23.3$  Hz), 116.6

(d,  $J = 23.5$  Hz), 114.8 (d,  $J = 9.7$  Hz), 101.0 (d,  $J = 3.0$  Hz), 90.0, 30.9, 27.6. IR (KBr,  $\text{cm}^{-1}$ ) 3051, 1767, 1712, 1575, 1484,

1422, 1364, 1205, 1091, 947, 845. HRMS (ESI) ( $[\text{M}+\text{Na}]^+$ ) Calcd. for  $[\text{C}_{20}\text{H}_{14}\text{F}_2\text{NaO}_3]^+$ : 363.0803, Found. 363.0799.

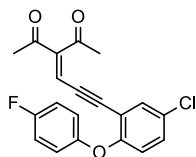

**3-(3-(5-Chloro-2-(4-fluorophenoxy)phenyl)prop-2-yn-1-ylidene)pentane-2,4-dione (1h)** Yield:

52%, yellow oil,  $R_f = 0.3$  (petroleum ether/AcOEt = 10:1).  $^1\text{H NMR}$  (500 MHz,  $\text{CDCl}_3$ )  $\delta$  7.47 (d,  $J$

= 2.5 Hz, 1H), 7.30 – 7.25 (m, 1H), 7.07 (t,  $J = 8.5$  Hz, 2H), 7.01 – 6.96 (m, 2H), 6.91 (s, 1H), 6.74

(d,  $J = 8.8$  Hz, 1H), 2.49 (s, 3H), 2.34 (s, 3H).  $^{19}\text{F NMR}$  (471 MHz,  $\text{CDCl}_3$ )  $\delta$  -118.3.  $^{13}\text{C NMR}$  (126

MHz,  $\text{CDCl}_3$ )  $\delta$  200.8, 195.5, 159.4 (d,  $J = 243.5$  Hz), 157.5, 151.7 (d,  $J = 2.8$  Hz), 149.7, 133.3, 131.6, 128.1, 121.4, 120.8

(d,  $J = 8.3$  Hz), 118.4, 116.7 (d,  $J = 23.5$  Hz), 114.7, 100.9, 90.2, 30.9, 27.6. IR (KBr,  $\text{cm}^{-1}$ ) 3031, 1712, 1688, 1569, 1501,

1477, 1423, 1364, 1250, 1214, 1092, 958, 827, 782. HRMS (ESI) ( $[\text{M}+\text{Na}]^+$ ) Calcd. for  $[\text{C}_{20}\text{H}_{14}\text{ClFNaO}_3]^+$ : 379.0508,

Found. 379.0510.

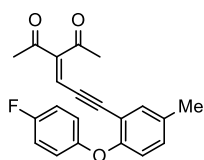

**3-(3-(2-(4-Fluorophenoxy)-5-methylphenyl)prop-2-yn-1-ylidene)pentane-2,4-dione (1i)** Yield:

63%, yellow oil,  $R_f = 0.3$  (petroleum ether/AcOEt = 10:1).  $^1\text{H NMR}$  (400 MHz,  $\text{CDCl}_3$ )  $\delta$  7.31 (s,

1H), 7.14 (d,  $J = 8.5$  Hz, 1H), 7.03 (t,  $J = 8.7$  Hz, 2H), 6.98 – 6.90 (m, 3H), 6.74 (d,  $J = 8.4$  Hz, 1H),

2.49 (s, 3H), 2.32 (d,  $J = 4.1$  Hz, 6H).  $^{19}\text{F NMR}$  (376 MHz,  $\text{CDCl}_3$ )  $\delta$  -119.6.  $^{13}\text{C NMR}$  (101 MHz,

$\text{CDCl}_3$ )  $\delta$  201.0, 195.6, 158.9 (d,  $J = 242.0$  Hz), 156.5, 152.6 (d,  $J = 2.3$  Hz), 148.9, 134.3, 133.1, 132.6, 122.4, 120.1 (d,  $J$

= 8.3 Hz), 117.9, 116.4 (d,  $J = 23.4$  Hz), 113.3, 103.3, 89.4, 31.0, 27.6, 20.4. IR (KBr,  $\text{cm}^{-1}$ ) 3029, 2924, 1710, 1690, 1568,

1495, 1424, 1364, 1246, 1215, 1133, 961, 832. HRMS (ESI) ( $[M+Na]^+$ ) Calcd. for  $[C_{21}H_{17}FNaO_3]^+$ : 359.1054, Found. 359.1049.

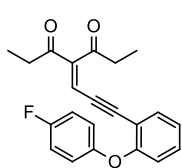

**4-(3-(2-(4-Fluorophenoxy)phenyl)prop-2-yn-1-ylidene)heptane-3,5-dione (1j)** Yield: 62%, yellow

oil,  $R_f = 0.3$  (petroleum ether/AcOEt = 10:1).  $^1H$  NMR (400 MHz,  $CDCl_3$ )  $\delta$  7.48 (d,  $J = 7.7$  Hz, 1H),

7.31 (t,  $J = 8.0$  Hz, 1H), 7.10 – 7.03 (m, 3H), 6.99 (dd,  $J = 9.2, 4.0$  Hz, 2H), 6.89 (s, 1H), 6.78 (d,  $J =$

8.3 Hz, 1H), 2.87 (q,  $J = 7.2$  Hz, 2H), 2.64 (q,  $J = 7.2$  Hz, 2H), 1.10 (t,  $J = 7.2$  Hz, 3H), 1.04 (t,  $J = 7.2$

Hz, 3H).  $^{19}F$  NMR (376 MHz,  $CDCl_3$ )  $\delta$  -118.9.  $^{13}C$  NMR (101 MHz,  $CDCl_3$ )  $\delta$  204.7, 198.3, 159.2 (d,  $J = 242.8$  Hz),

158.0, 152.1 (d,  $J = 2.9$  Hz), 149.4, 134.1, 131.5, 123.1, 120.9 (d,  $J = 8.2$  Hz), 120.3, 117.2, 116.5 (d,  $J = 23.5$  Hz), 113.3,

101.3, 89.4, 36.7, 32.9, 7.9, 7.5. IR (KBr,  $cm^{-1}$ ) 2981, 2938, 1711, 1570, 1501, 1447, 1371, 1260, 1211, 1039, 966, 848,

756. HRMS (ESI) ( $[M+Na]^+$ ) Calcd. for  $[C_{22}H_{19}FNaO_3]^+$ : 373.1210, Found. 373.1205.

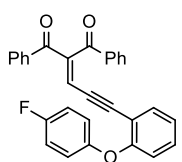

**2-(3-(2-(4-Fluorophenoxy)phenyl)prop-2-yn-1-ylidene)-1,3-diphenylpropane-1,3-dione (1k)** Yield:

51%, yellow oil,  $R_f = 0.3$  (petroleum ether/AcOEt = 10:1).  $^1H$  NMR (400 MHz,  $CDCl_3$ )  $\delta$  7.94 (d,  $J =$

8.2 Hz, 2H), 7.80 (d,  $J = 8.1$  Hz, 2H), 7.52 (dt,  $J = 12.7, 7.4$  Hz, 2H), 7.41 (dt,  $J = 14.5, 7.6$  Hz, 4H),

7.21 (t,  $J = 7.9$  Hz, 1H), 7.04 – 6.90 (m, 5H), 6.87 – 6.82 (m, 2H), 6.68 (d,  $J = 8.4$  Hz, 1H).  $^{19}F$  NMR

(376 MHz,  $CDCl_3$ )  $\delta$  -119.2.  $^{13}C$  NMR (101 MHz,  $CDCl_3$ )  $\delta$  194.0, 192.9, 159.1 (d,  $J = 242.1$  Hz), 157.9, 152.1 (d,  $J = 2.5$

Hz), 147.9, 136.8, 136.3, 134.2, 133.7, 132.9, 131.3, 129.6, 129.3, 128.7, 128.6, 124.3, 122.9, 120.9 (d,  $J = 8.3$  Hz), 117.2,

116.3 (d,  $J = 23.4$  Hz), 113.3, 102.1, 89.5. IR (KBr,  $cm^{-1}$ ) 3061, 2957, 2925, 1710, 1679, 1574, 1500, 1446, 1357, 1261,

1213, 1116, 971, 850, 733. HRMS (ESI) ( $[M+Na]^+$ ) Calcd. for  $[C_{30}H_{19}FNaO_3]^+$ : 469.1210, Found. 469.1206.

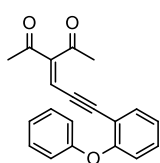

**3-(3-(2-Phenoxyphenyl)prop-2-yn-1-ylidene)pentane-2,4-dione (1l)** Yield: 57%, yellow oil,  $R_f = 0.3$

(petroleum ether/AcOEt = 10:1).  $^1H$  NMR (400 MHz,  $CDCl_3$ )  $\delta$  7.51 (d,  $J = 7.7$  Hz, 1H), 7.39 – 7.29 (m,

3H), 7.12 (dt,  $J = 21.0, 7.5$  Hz, 2H), 7.01 (d,  $J = 8.0$  Hz, 2H), 6.94 (s, 1H), 6.87 (d,  $J = 8.4$  Hz, 1H), 2.49

(s, 3H), 2.32 (s, 3H).  $^{13}C$  NMR (101 MHz,  $CDCl_3$ )  $\delta$  201.0, 195.7, 158.6, 156.3, 148.9, 134.1, 131.7,

129.9, 124.0, 123.2, 122.4, 119.1, 118.1, 113.7, 103.3, 89.6, 31.0, 27.7. IR (KBr,  $cm^{-1}$ ) 3032, 1712, 1682, 1576, 1483, 1445,

1363, 1233, 1162, 1022, 953, 871, 755. HRMS (ESI) ( $[M+Na]^+$ ) Calcd. for  $[C_{20}H_{16}NaO_3]^+$ : 327.0992, Found. 327.0988.

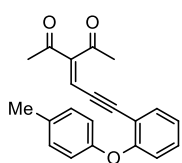

**3-(3-(2-(*p*-Tolyloxy)phenyl)prop-2-yn-1-ylidene)pentane-2,4-dione (1m)** Yield: 57%, yellow oil,  $R_f$

= 0.3 (petroleum ether/AcOEt = 10:1).  $^1H$  NMR (400 MHz,  $CDCl_3$ )  $\delta$  7.50 (d,  $J = 7.7$  Hz, 1H), 7.29 (q,

$J = 6.9, 6.1$  Hz, 1H), 7.16 (d,  $J = 8.8$  Hz, 2H), 7.05 (t,  $J = 7.4$  Hz, 1H), 6.97 (s, 1H), 6.91 (d,  $J = 8.4$  Hz,

2H), 6.81 (d,  $J = 8.5$  Hz, 1H), 2.53 (s, 3H), 2.34 (d,  $J = 4.7$  Hz, 6H).  $^{13}C$  NMR (101 MHz,  $CDCl_3$ )  $\delta$

201.1, 195.7, 159.2, 153.8, 148.8, 134.0, 133.8, 131.7, 130.4, 122.8, 122.6, 119.3, 117.3, 113.2, 103.6, 89.6, 31.0, 27.7,

20.8. IR (KBr,  $\text{cm}^{-1}$ ) 3031, 1710, 1684, 1573, 1501, 1481, 1444, 1361, 1233, 1024, 958, 854, 752. HRMS (ESI) ( $[\text{M}+\text{Na}]^+$ )

Calcd. for  $[\text{C}_{21}\text{H}_{18}\text{NaO}_3]^+$ : 341.1148, Found. 341.1143.

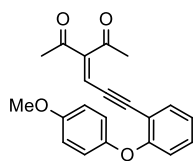

**3-(3-(2-(4-Methoxyphenoxy)phenyl)prop-2-yn-1-ylidene)pentane-2,4-dione (1n)** Yield: 55%,

yellow oil,  $R_f = 0.3$  (petroleum ether/AcOEt = 10:1).  $^1\text{H}$  NMR (400 MHz,  $\text{CDCl}_3$ )  $\delta$  7.49 (d,  $J = 7.4$

Hz, 1H), 7.28 (t,  $J = 7.6$  Hz, 1H), 7.06 – 6.95 (m, 4H), 6.90 (d,  $J = 6.9$  Hz, 2H), 6.75 (d,  $J = 8.4$  Hz,

1H), 3.81 (s, 3H), 2.55 (s, 3H), 2.34 (s, 3H).  $^{13}\text{C}$  NMR (101 MHz,  $\text{CDCl}_3$ )  $\delta$  201.1, 195.7, 159.9, 156.4,

149.2, 148.8, 134.0, 131.7, 122.6, 122.4, 121.0, 116.4, 115.0, 112.6, 103.7, 89.6, 55.7, 31.0, 27.7. IR (KBr,  $\text{cm}^{-1}$ ) 3012,

2955, 1712, 1683, 1576, 1480, 1446, 1357, 1235, 1031, 958, 856, 751. HRMS (ESI) ( $[\text{M}+\text{Na}]^+$ ) Calcd. for  $[\text{C}_{21}\text{H}_{18}\text{NaO}_4]^+$ :

357.1097, Found. 357.1095.

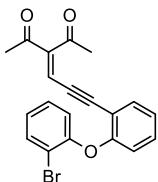

**3-(3-(2-(2-Bromophenoxy)phenyl)prop-2-yn-1-ylidene)pentane-2,4-dione (1o)** Yield: 87%, yellow oil,

$R_f = 0.3$  (petroleum ether/AcOEt = 10:1).  $^1\text{H}$  NMR (500 MHz, Chloroform- $d$ )  $\delta$  7.65 (dd,  $J = 7.9, 1.5$  Hz,

1H), 7.53 (dd,  $J = 7.7, 1.6$  Hz, 1H), 7.37 – 7.25 (m, 2H), 7.09 (ddd,  $J = 13.7, 8.2, 6.9$  Hz, 2H), 6.98 (d,  $J$

= 8.9 Hz, 2H), 6.71 (d,  $J = 8.3$  Hz, 1H), 2.54 (s, 3H), 2.34 (s, 3H).  $^{13}\text{C}$  NMR (126 MHz, Chloroform- $d$ )  $\delta$

201.01, 195.73, 158.12, 152.74, 148.91, 134.18, 134.04, 131.71, 128.93, 125.89, 123.35, 122.37, 121.16,

116.89, 115.07, 113.10, 102.96, 89.88, 31.13, 27.75. IR (KBr,  $\text{cm}^{-1}$ ) 3027, 1708, 1681, 1576, 1480, 1363, 1235, 1021, 960,

851, 746. HRMS (ESI) ( $[\text{M}+\text{Na}]^+$ ) Calcd. for  $[\text{C}_{20}\text{H}_{16}\text{BrNaO}_3]^+$ : 383.0277, Found. 383.0270.

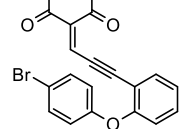

**2-(3-(2-(4-Bromophenoxy)phenyl)prop-2-yn-1-ylidene)-5,5-dimethylcyclohexane-1,3-dione (1p)**

Yield: 12%, yellow oil,  $R_f = 0.3$  (petroleum ether/AcOEt = 10:1).  $^1\text{H}$  NMR (500 MHz, Chloroform- $d$ )  $\delta$

7.75 (dd,  $J = 7.8, 1.7$  Hz, 1H), 7.46 (d,  $J = 8.8$  Hz, 1H), 7.41 (d,  $J = 8.7$  Hz, 1H), 7.29 (d,  $J = 5.5$  Hz, 2H),

7.19 – 7.15 (m, 1H), 6.95 (d,  $J = 8.7$  Hz, 2H), 6.82 (d,  $J = 8.5$  Hz, 1H), 2.57 (s, 4H), 1.10 (s, 6H).  $^{13}\text{C}$

NMR (126 MHz, Chloroform- $d$ )  $\delta$  196.4, 195.1, 158.5, 156.0, 138.6, 135.6, 132.7, 132.4, 129.6, 123.9,

120.7, 118.6, 116.3, 114.6, 108.6, 94.8, 53.1, 52.2, 31.5, 30.0, 28.6. HRMS (ESI) ( $[\text{M}+\text{Na}]^+$ ) Calcd. for  $[\text{C}_{23}\text{H}_{19}\text{BrNaO}_3]^+$ :

445.0410, Found. 445.0411.

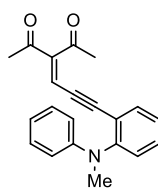

**3-(3-(2-(Methyl(phenyl)amino)phenyl)prop-2-yn-1-ylidene)pentane-2,4-dione (1q)** Yield: 33%,

yellow oil,  $R_f = 0.3$  (petroleum ether/AcOEt = 10:1).  $^1\text{H}$  NMR (400 MHz,  $\text{CDCl}_3$ )  $\delta$  7.51 (d,  $J = 7.7$  Hz,

1H), 7.39 (d,  $J = 8.1$  Hz, 1H), 7.24 – 7.15 (m, 4H), 6.82 – 6.76 (m, 2H), 6.72 (d,  $J = 8.1$  Hz, 2H), 3.28 (s,

3H), 2.31 (s, 3H), 2.28 (s, 3H).  $^{13}\text{C}$  NMR (101 MHz,  $\text{CDCl}_3$ )  $\delta$  201.0, 195.5, 151.4, 149.0, 148.8, 134.5,

131.6, 129.0, 127.3, 125.1, 122.2, 120.0, 118.9, 115.6, 105.2, 89.7, 40.2, 30.8, 27.4. IR (KBr,  $\text{cm}^{-1}$ ) 3029, 2954, 1711, 1575,

1500, 1483, 1446, 1366, 1231, 1129, 973, 858, 749. HRMS (ESI) ( $[\text{M}+\text{Na}]^+$ ) Calcd. for  $[\text{C}_{21}\text{H}_{19}\text{NNaO}_3]^+$ : 340.1308, Found.

340.1309.

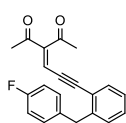

**3-(3-(2-(4-Fluorobenzyl)phenyl)prop-2-yn-1-ylidene)pentane-2,4-dione (1r)** Yield: 88%, yellow oil,  $R_f =$

0.3 (petroleum ether/AcOEt = 10:1).  $^1\text{H}$  NMR (500 MHz, Chloroform- $d$ )  $\delta$  7.50 (d,  $J = 7.7$  Hz, 1H), 7.35 (t,

$J = 7.6$  Hz, 1H), 7.24 (t,  $J = 7.8$  Hz, 1H), 7.19 – 7.12 (m, 3H), 6.98 (t,  $J = 8.7$  Hz, 2H), 6.93 (s, 1H), 4.13 (s,

2H), 2.46 (s, 3H), 2.37 (s, 3H).  $^{19}\text{F}$  NMR (471 MHz, Chloroform-d)  $\delta$  -116.87.  $^{13}\text{C}$  NMR (126 MHz, Chloroform-d)  $\delta$  200.8, 195.6, 161.5 (d,  $J_{\text{C-F}} = 244.3$  Hz), 149.4, 143.7, 135.7 (d,  $J_{\text{C-F}} = 3.2$  Hz), 133.2, 130.5, 130.2 (d,  $J_{\text{C-F}} = 7.8$  Hz), 129.7, 126.6, 122.0, 121.4, 115.3 (d,  $J_{\text{C-F}} = 21.3$  Hz), 105.8, 88.8, 39.2, 30.9, 27.2. HRMS (ESI) ( $[\text{M}+\text{H}]^+$ ) Calcd. for  $[\text{C}_{21}\text{H}_{18}\text{FO}_2]^+$ : 321.1285, Found. 321.1286.

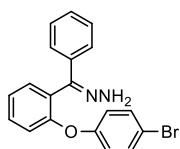

**((2-(4-Bromophenoxy)phenyl)(phenyl)methylene)hydrazine (S15a)** Yield: 87%, yellow oil,  $R_f = 0.25$  (petroleum ether/AcOEt = 5:1).  $E/Z = 81:19$ .  $^1\text{H}$  NMR (500 MHz, Chloroform-d)  $\delta$  7.54 – 7.41 (m, 2H), 7.43 – 7.22 (m, 8H), 7.06 (d,  $J = 8.2$  Hz, 1H), 6.81 (d,  $J = 8.8$  Hz, 2H), 5.53 (br, 2H).  $^{13}\text{C}$  NMR (126 MHz, Chloroform-d)  $\delta$  155.7, 154.6, 145.8, 138.0, 132.6, 131.0, 130.7, 128.1, 128.1, 126.0, 124.5, 120.9, 119.2, 118.8, 116.2. IR (KBr,  $\text{cm}^{-1}$ ) 3416, 3059, 1576, 1480, 1442, 1328 1233, 1091, 1066, 832, 754. HRMS (ESI) ( $[\text{M}+\text{H}]^+$ ) Calcd. for  $[\text{C}_{19}\text{H}_{16}\text{BrN}_2\text{O}]^+$ : 367.0441, Found. 367.0438.

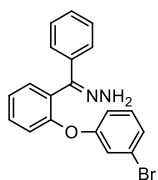

**((2-(3-Bromophenoxy)phenyl)(phenyl)methylene)hydrazine (S15b)** Yield: 82%, yellow oil,  $R_f = 0.25$  (petroleum ether/AcOEt = 5:1).  $E/Z = 80:20$ .  $^1\text{H}$  NMR (500 MHz, Chloroform-d)  $\delta$  7.50 – 7.45 (m, 2H), 7.34 – 7.26 (m, 6H), 7.18 (dt,  $J = 7.9, 1.1$  Hz, 1H), 7.11 (dd,  $J = 8.2, 2.1$  Hz, 2H), 7.06 (t,  $J = 2.1$  Hz, 1H), 6.86 (dd,  $J = 8.2, 2.3$  Hz, 1H), 5.54 (br, 2H).  $^{13}\text{C}$  NMR (126 MHz, Chloroform-d)  $\delta$  157.4, 154.2, 145.7, 137.9, 131.1, 130.8, 130.7, 128.1, 128.1, 126.6, 126.0, 124.7, 124.4, 122.6, 122.2, 119.7, 117.7. IR (KBr,  $\text{cm}^{-1}$ ) 3417, 3061, 1577, 1472, 1438, 1227, 1060, 946, 890, 761. HRMS (ESI) ( $[\text{M}+\text{H}]^+$ ) Calcd. for  $[\text{C}_{19}\text{H}_{16}\text{BrN}_2\text{O}]^+$ : 367.0441, Found. 367.0442.

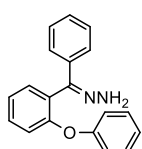

**((2-Phenoxyphenyl)(phenyl)methylene)hydrazine (S15c)** Yield: 93%, yellow oil,  $R_f = 0.25$  (petroleum ether/AcOEt = 5:1).  $E/Z = 76:24$ .  $^1\text{H}$  NMR (500 MHz, Chloroform-d)  $\delta$  7.58 – 7.52 (m, 2H), 7.43 (ddd,  $J = 8.9, 7.2, 1.9$  Hz, 1H), 7.35 – 7.26 (m, 8H), 7.12 – 7.05 (m, 2H), 6.99 – 6.94 (m, 2H), 5.57 (br, 2H).  $^{13}\text{C}$  NMR (126 MHz, Chloroform-d)  $\delta$  156.4, 155.1, 146.2, 138.2, 130.9, 130.6, 129.7, 128.1, 128.0, 126.1, 123.9, 123.8, 119.5, 118.8, 117.4. IR (KBr,  $\text{cm}^{-1}$ ) 3416, 3056, 1587, 1484, 1443, 1329, 1235, 1067, 948, 869, 746. HRMS (ESI) ( $[\text{M}+\text{H}]^+$ ) Calcd. for  $[\text{C}_{19}\text{H}_{17}\text{N}_2\text{O}]^+$ : 289.1335, Found. 289.1336.

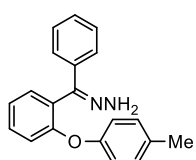

**(Phenyl(2-(p-tolyloxy)phenyl)methylene)hydrazine (S15d)** Yield: 91%, yellow oil,  $R_f = 0.25$  (petroleum ether/AcOEt = 5:1).  $E/Z = 86:14$ .  $^1\text{H}$  NMR (500 MHz, Chloroform-d)  $\delta$  7.61 – 7.52 (m, 2H), 7.41 (ddd,  $J = 8.6, 7.3, 1.9$  Hz, 1H), 7.36 – 7.27 (m, 4H), 7.24 (td,  $J = 7.4, 1.1$  Hz, 1H), 7.10 (d,  $J = 8.3$  Hz, 2H), 7.03 (dd,  $J = 8.4, 1.1$  Hz, 1H), 6.87 (d,  $J = 8.5$  Hz, 2H), 5.58 (br, 2H), 2.33 (s, 3H).  $^{13}\text{C}$  NMR (126 MHz, Chloroform-d)  $\delta$  155.6, 154.0, 146.4, 138.3, 133.4, 130.8, 130.5, 130.2, 128.1, 128.0, 126.1, 123.55, 123.50, 119.6, 118.2, 20.8. IR (KBr,  $\text{cm}^{-1}$ ) 3418, 3029, 2949, 1589, 1492, 1444, 1237, 946, 832, 763. HRMS (ESI) ( $[\text{M}+\text{H}]^+$ )

Calcd. for  $[C_{20}H_{19}N_2O]^+$ : 303.1492, Found. 303.1493.

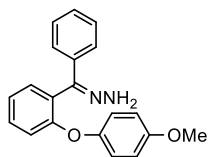

**((2-(4-Methoxyphenoxy)phenyl)(phenyl)methylene)hydrazine (S15e)** Yield: 94%, yellow oil,  $R_f$

= 0.25 (petroleum ether/AcOEt = 5:1).  $E/Z$  = 65:35.  $^1H$  NMR (500 MHz, Chloroform- $d$ )  $\delta$  7.57 –

7.53 (m, 2H), 7.40 – 7.36 (m, 1H), 7.35 – 7.25 (m, 4H), 7.21 (td,  $J$  = 7.4, 1.1 Hz, 1H), 6.90 (d,  $J$  =

9.1 Hz, 2H), 6.83 (d,  $J$  = 9.1 Hz, 2H), 6.74 (d,  $J$  = 9.0 Hz, 1H), 5.56 (br, 2H), 3.78 (s, 3H).  $^{13}C$  NMR

(126 MHz, Chloroform- $d$ )  $\delta$  156.2, 149.5, 146.5, 138.2, 130.7, 130.5, 128.7, 128.2, 128.1, 126.1, 123.2, 121.2, 119.3, 117.4,

114.8, 55.6. IR (KBr,  $cm^{-1}$ ) 3406, 3058, 2947, 1593, 1495, 1447, 1226, 1033, 948, 840, 764. HRMS (ESI) ( $[M+H]^+$ ) Calcd.

for  $[C_{20}H_{19}N_2O_2]^+$ : 319.1441, Found. 319.1442.

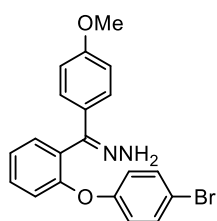

**((2-(4-Bromophenoxy)phenyl)(4-methoxyphenyl)methylene)hydrazine (S15f)** Yield: 83%,

yellow oil,  $R_f$  = 0.25 (petroleum ether/AcOEt = 5:1).  $E/Z$  = 85:15.  $^1H$  NMR (500 MHz, Chloroform- $d$ )  $\delta$  7.46 – 7.40 (m, 3H), 7.38 – 7.34 (m, 2H), 7.32 – 7.28 (m, 2H), 7.06 (d,  $J$  = 8.2 Hz, 1H), 6.82

(dd,  $J$  = 11.1, 8.9 Hz, 4H), 5.33 (br, 2H), 3.81 (s, 3H).  $^{13}C$  NMR (126 MHz, Chloroform- $d$ )  $\delta$  159.7,

155.8, 154.5, 146.1, 132.5, 131.0, 130.8, 130.6, 127.3, 124.5, 124.4, 120.9, 119.3, 116.2, 113.6, 55.3.

IR (KBr,  $cm^{-1}$ ) 3414, 3055, 2941, 1603, 1478, 1445, 1240, 1166, 1025, 832, 749. HRMS (ESI) ( $[M+H]^+$ ) Calcd. for

$[C_{20}H_{18}BrN_2O_2]^+$ : 397.0546, Found. 397.0547.

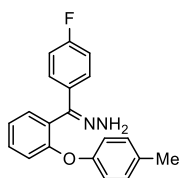

**(E)-((4-Fluorophenyl)(2-(p-tolylloxy)phenyl)methylene)hydrazine (S15g)** Yield: 62%, yellow oil,  $R_f$

= 0.25 (petroleum ether/AcOEt = 5:1).  $^1H$  NMR (500 MHz, Chloroform- $d$ )  $\delta$  7.52 (ddd,  $J$  = 8.7, 5.3, 1.5

Hz, 2H), 7.41 (ddd,  $J$  = 8.7, 7.2, 2.0 Hz, 1H), 7.30 – 7.22 (m, 2H), 7.09 (d,  $J$  = 8.2 Hz, 2H), 7.04 – 6.96

(m, 3H), 6.87 – 6.81 (m, 2H), 5.53 (br, 2H), 2.32 (s, 3H).  $^{19}F$  NMR (471 MHz, Chloroform- $d$ )  $\delta$  -114.27.

$^{13}C$  NMR (126 MHz, Chloroform- $d$ )  $\delta$  162.8 (d,  $J$  = 247.2 Hz), 155.5, 153.9, 145.5, 134.5 (d,  $J$  = 3.1 Hz), 133.5, 130.7 (d,

$J$  = 3.8 Hz), 130.2, 127.8 (d,  $J$  = 8.1 Hz), 123.6, 123.2, 119.5, 118.3, 115.1, 114.9, 20.7. IR (KBr,  $cm^{-1}$ ) 3411, 3051, 2944,

1600, 1498, 1444, 1233, 1158, 834, 752. HRMS (ESI) ( $[M+H]^+$ ) Calcd. for  $[C_{20}H_{18}FN_2O]^+$ : 321.1398, Found. 321.1399.

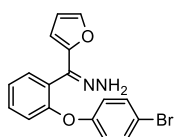

**(Z)-((2-(4-Bromophenoxy)phenyl)(furan-2-yl)methylene)hydrazine (S15h)** Yield: 53%, yellow oil,

$R_f$  = 0.25 (petroleum ether/AcOEt = 5:1).  $^1H$  NMR (500 MHz, Chloroform- $d$ )  $\delta$  7.45 (ddd,  $J$  = 8.2, 7.3,

1.8 Hz, 1H), 7.43 – 7.34 (m, 4H), 7.31 – 7.25 (m, 1H), 7.05 (dd,  $J$  = 8.2, 1.1 Hz, 1H), 6.87 – 6.79 (m,

2H), 6.35 (dd,  $J$  = 3.4, 1.8 Hz, 1H), 6.13 (dd,  $J$  = 3.3, 0.9 Hz, 1H), 5.53 (s, 2H).  $^{13}C$  NMR (126 MHz, Chloroform- $d$ )  $\delta$

155.8, 154.4, 152.2, 142.9, 138.0, 132.6, 131.2, 131.0, 124.5, 122.6, 120.6, 119.3, 116.2, 111.1, 109.2. IR (KBr,  $cm^{-1}$ ) 3414,

3055, 2946, 1574, 1480, 1442, 1234, 1155, 1066, 969, 745. HRMS (ESI) ( $[M+H]^+$ ) Calcd. for  $[C_{17}H_{14}BrN_2O_2]^+$ : 357.0233,

Found. 357.0234.

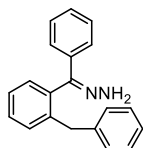

**((2-Benzylphenyl)(phenyl)methylene)hydrazine (S15i)** Yield: 78%, yellow oil,  $R_f = 0.25$  (petroleum ether/AcOEt = 5:1). *E/Z* = 96:4.  $^1\text{H NMR}$  (500 MHz, Chloroform- $d$ )  $\delta$  7.50 (dt,  $J = 7.3, 1.8$  Hz, 2H), 7.42 (pd,  $J = 7.4, 1.7$  Hz, 2H), 7.37 – 7.29 (m, 4H), 7.27 – 7.16 (m, 4H), 7.15 – 7.10 (m, 2H), 5.23 (br, 2H), 3.83 (s, 2H).  $^{13}\text{C NMR}$  (126 MHz, Chloroform- $d$ )  $\delta$  148.9, 140.4, 140.0, 138.0, 132.5, 130.6, 129.4, 129.3, 129.2, 128.4, 128.3, 128.1, 127.3, 126.1, 126.0, 39.1. IR (KBr,  $\text{cm}^{-1}$ ) 3416, 3024, 2942, 1573, 1488, 1443, 1169, 739, 696. HRMS (ESI) ( $[\text{M}+\text{H}]^+$ ) Calcd. for  $[\text{C}_{20}\text{H}_{19}\text{N}_2]^+$ : 287.1543, Found. 287.1544.

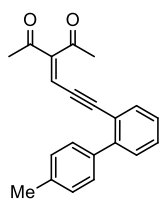

**3-(3-(4'-Methyl-[1,1'-biphenyl]-2-yl)prop-2-yn-1-ylidene)pentane-2,4-dione (5a)** Yield: 71%, yellow oil,  $R_f = 0.3$  (petroleum ether/AcOEt = 10:1).  $^1\text{H NMR}$  (400 MHz,  $\text{CDCl}_3$ )  $\delta$  7.49 (d,  $J = 7.7$  Hz, 1H), 7.35 (d,  $J = 7.4$  Hz, 1H), 7.30 (d,  $J = 8.0$  Hz, 3H), 7.24 (t,  $J = 7.5$  Hz, 1H), 7.15 (d,  $J = 7.7$  Hz, 2H), 6.77 (s, 1H), 2.33 (s, 3H), 2.21 (s, 3H), 2.12 (s, 3H).  $^{13}\text{C NMR}$  (101 MHz,  $\text{CDCl}_3$ )  $\delta$  201.0, 195.6, 148.7, 144.8, 137.8, 137.1, 133.8, 130.3, 129.8, 129.1, 129.0, 127.1, 122.4, 120.1, 107.5, 87.7, 30.6, 27.5, 21.2. IR (KBr,  $\text{cm}^{-1}$ ) 3023, 2921, 1711, 1669, 1570, 1476, 1419, 1361, 1243, 1176, 953, 822, 762. HRMS (ESI) ( $[\text{M}+\text{H}]^+$ ) Calcd. for  $[\text{C}_{21}\text{H}_{19}\text{O}_2]^+$ : 303.1380, Found. 303.1384.

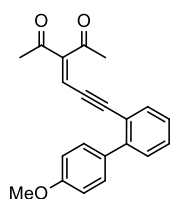

**3-(3-(4'-Methoxy-[1,1'-biphenyl]-2-yl)prop-2-yn-1-ylidene)pentane-2,4-dione (5b)** Yield: 69%, yellow oil,  $R_f = 0.3$  (petroleum ether/AcOEt = 10:1).  $^1\text{H NMR}$  (400 MHz,  $\text{CDCl}_3$ )  $\delta$  7.57 (d,  $J = 7.6$  Hz, 1H), 7.46 – 7.41 (m, 3H), 7.38 (d,  $J = 6.7$  Hz, 1H), 7.31 (t,  $J = 7.5$  Hz, 1H), 6.99 – 6.95 (m, 3H), 6.86 (s, 1H), 3.87 (s, 3H), 2.30 (s, 3H), 2.23 (s, 3H).  $^{13}\text{C NMR}$  (101 MHz,  $\text{CDCl}_3$ )  $\delta$  201.0, 195.6, 159.5, 148.7, 144.5, 133.8, 132.3, 130.3, 130.3, 129.67, 126.9, 122.3, 120.0, 113.8, 107.6, 87.7, 55.4, 30.6, 27.5. IR (KBr,  $\text{cm}^{-1}$ ) 3004, 2959, 2837, 1710, 1664, 1576, 1516, 1474, 1419, 1371, 1248, 1178, 1035, 958, 835, 763. HRMS (ESI) ( $[\text{M}+\text{H}]^+$ ) Calcd. for  $[\text{C}_{21}\text{H}_{19}\text{O}_3]^+$ : 319.1329, Found. 319.1327.

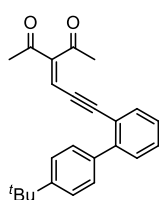

**3-(3-(4'-(tert-Butyl)-[1,1'-biphenyl]-2-yl)prop-2-yn-1-ylidene)pentane-2,4-dione (5c)** Yield: 68%, yellow oil,  $R_f = 0.3$  (petroleum ether/AcOEt = 10:1).  $^1\text{H NMR}$  (400 MHz,  $\text{CDCl}_3$ )  $\delta$  7.58 (d,  $J = 7.6$  Hz, 1H), 7.48 – 7.38 (m, 6H), 7.32 (td,  $J = 7.5, 1.6$  Hz, 1H), 6.88 (s, 1H), 2.29 (s, 3H), 2.12 (s, 3H), 1.38 (s, 9H).  $^{13}\text{C NMR}$  (101 MHz,  $\text{CDCl}_3$ )  $\delta$  200.9, 195.6, 150.9, 148.6, 144.6, 137.0, 133.9, 130.3, 129.9, 128.8, 127.0, 125.3, 122.4, 120.1, 107.6, 87.8, 34.7, 31.4, 30.5, 27.6. IR (KBr,  $\text{cm}^{-1}$ ) 3027, 2961, 2869, 1710, 1690, 1570, 1516, 1476, 1363, 1243, 1174, 1054, 955, 837, 763. HRMS (ESI) ( $[\text{M}+\text{Na}]^+$ ) Calcd. for  $[\text{C}_{24}\text{H}_{24}\text{NaO}_2]^+$ : 367.1669, Found. 367.1673.

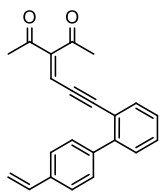

**3-(3-(4'-Vinyl-[1,1'-biphenyl]-2-yl)prop-2-yn-1-ylidene)pentane-2,4-dione (5d)** Yield: 67%, yellow oil,  $R_f = 0.3$  (petroleum ether/AcOEt = 10:1).  $^1\text{H NMR}$  (400 MHz,  $\text{CDCl}_3$ )  $\delta$  7.58 (d,  $J = 7.7$  Hz, 1H), 7.49 – 7.43 (m, 5H), 7.40 (d,  $J = 7.5$  Hz, 1H), 7.33 (t,  $J = 7.5$  Hz, 1H), 6.84 (s, 1H), 6.77 (dd,  $J = 17.6$ , 10.9 Hz, 1H), 5.83 (d,  $J = 17.6$  Hz, 1H), 5.31 (d,  $J = 10.9$  Hz, 1H), 2.29 (s, 3H), 2.19 (s, 3H).  $^{13}\text{C NMR}$  (101 MHz,  $\text{CDCl}_3$ )  $\delta$  201.0, 195.6, 148.9, 144.3, 139.3, 137.2, 136.3, 133.9, 130.4, 129.7, 129.3, 127.3, 126.2, 122.1, 120.1, 114.5, 107.0, 87.8, 30.6, 27.4. IR (KBr,  $\text{cm}^{-1}$ ) 3026, 2943, 2837, 1710, 1691, 1576, 1476, 1370, 1244, 1176, 957, 845, 763. HRMS (ESI) ( $[\text{M}+\text{H}]^+$ ) Calcd. for  $[\text{C}_{22}\text{H}_{19}\text{O}_2]^+$ : 315.1380, Found. 315.1382.

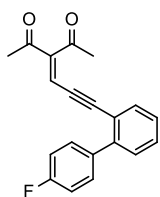

**3-(3-(4'-Fluoro-[1,1'-biphenyl]-2-yl)prop-2-yn-1-ylidene)pentane-2,4-dione (5e)** Yield: 55%, yellow oil,  $R_f = 0.3$  (petroleum ether/AcOEt = 10:1).  $^1\text{H NMR}$  (500 MHz,  $\text{CDCl}_3$ )  $\delta$  7.58 (dd,  $J = 7.7$ , 1.4 Hz, 1H), 7.48 – 7.44 (m, 3H), 7.36 (ddd,  $J = 14.8$ , 7.5, 1.3 Hz, 2H), 7.16 – 7.10 (m, 2H), 6.82 (s, 1H), 2.31 (s, 3H), 2.25 (s, 3H).  $^{19}\text{F NMR}$  (471 MHz,  $\text{CDCl}_3$ )  $\delta$  -114.2.  $^{13}\text{C NMR}$  (126 MHz,  $\text{CDCl}_3$ )  $\delta$  200.8, 195.5, 162.6 (d,  $J = 247.5$  Hz), 149.1, 143.6, 135.93 (d,  $J = 3.5$  Hz), 133.82, 130.80 (d,  $J = 8.2$  Hz), 130.36, 129.72, 127.40, 121.91, 120.14, 115.29 (d,  $J = 21.6$  Hz), 106.61, 87.79, 30.61, 27.37. IR (KBr,  $\text{cm}^{-1}$ ) 3029, 2927, 1711, 1692, 1576, 1477, 1370, 1242, 1176, 1054, 958, 840, 763. HRMS (ESI) ( $[\text{M}+\text{Na}]^+$ ) Calcd. for  $[\text{C}_{20}\text{H}_{15}\text{FNaO}_2]^+$ : 329.0948, Found. 329.0943.

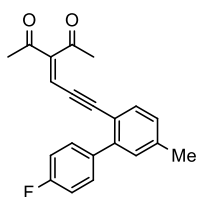

**3-(3-(4'-Fluoro-5-methyl-[1,1'-biphenyl]-2-yl)prop-2-yn-1-ylidene)pentane-2,4-dione (5f)** Yield: 68%, yellow oil,  $R_f = 0.3$  (petroleum ether/AcOEt = 10:1).  $^1\text{H NMR}$  (400 MHz,  $\text{CDCl}_3$ )  $\delta$  7.50 – 7.41 (m, 3H), 7.21 – 7.08 (m, 4H), 6.83 (s, 1H), 2.41 (s, 3H), 2.30 (s, 3H), 2.24 (s, 3H).  $^{19}\text{F NMR}$  (376 MHz,  $\text{CDCl}_3$ )  $\delta$  -114.4.  $^{13}\text{C NMR}$  (101 MHz,  $\text{CDCl}_3$ )  $\delta$  200.9, 195.5, 162.6 (d,  $J = 247.2$  Hz), 148.6, 143.5, 141.0, 136.0 (d,  $J = 3.2$  Hz), 133.8, 130.8 (d,  $J = 8.1$  Hz), 130.5, 128.3, 122.3, 117.2, 115.2 (d,  $J = 21.4$  Hz), 107.4, 87.5, 30.6, 27.4, 21.6. IR (KBr,  $\text{cm}^{-1}$ ) 3026, 2925, 1711, 1692, 1575, 1511, 1488, 1370, 1224, 1176, 1024, 959, 837. HRMS (ESI) ( $[\text{M}+\text{Na}]^+$ ) Calcd. for  $[\text{C}_{21}\text{H}_{17}\text{FNaO}_2]^+$ : 343.1105, Found. 343.1100.

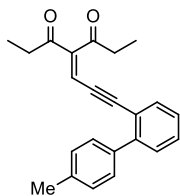

**4-(3-(4'-Methyl-[1,1'-biphenyl]-2-yl)prop-2-yn-1-ylidene)heptane-3,5-dione (5g)** Yield: 77%, yellow oil,  $R_f = 0.3$  (petroleum ether/AcOEt = 10:1).  $^1\text{H NMR}$  (400 MHz,  $\text{CDCl}_3$ )  $\delta$  7.43 (d,  $J = 7.7$  Hz, 1H), 7.34 – 7.27 (m, 4H), 7.20 (t,  $J = 7.4$  Hz, 1H), 7.13 (d,  $J = 7.9$  Hz, 2H), 6.71 (s, 1H), 2.48 (dq,  $J = 17.3$ , 7.2 Hz, 4H), 2.31 (s, 3H), 0.97 (t,  $J = 7.2$  Hz, 3H), 0.86 (t,  $J = 7.2$  Hz, 3H).  $^{13}\text{C NMR}$  (101 MHz,  $\text{CDCl}_3$ )  $\delta$  204.6, 198.4, 149.0, 144.5, 137.7, 137.0, 133.8, 130.2, 129.8, 129.0, 129.0, 127.0, 120.5, 120.1, 105.9, 87.5, 36.6, 32.8, 21.3, 8.0, 7.5. IR (KBr,  $\text{cm}^{-1}$ ) 3025, 2979, 2937, 1709, 1691, 1577, 1476, 1375, 1206, 1115, 1043, 967, 821, 762. HRMS (ESI) ( $[\text{M}+\text{Na}]^+$ ) Calcd. for  $[\text{C}_{23}\text{H}_{22}\text{NaO}_2]^+$ : 353.1512, Found. 353.1511.

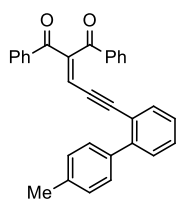

**2-(3-(4'-Methyl-[1,1'-biphenyl]-2-yl)prop-2-yn-1-ylidene)-1,3-diphenylpropane-1,3-dione (5h)**

Yield: 63%, yellow oil,  $R_f = 0.3$  (petroleum ether/AcOEt = 10:1).  $^1\text{H NMR}$  (400 MHz,  $\text{CDCl}_3$ )  $\delta$  8.00

(d,  $J = 7.4$  Hz, 2H), 7.82 (d,  $J = 7.8$  Hz, 2H), 7.60 – 7.41 (m, 6H), 7.37 – 7.33 (m, 4H), 7.18 (d,  $J = 7.6$

Hz, 3H), 7.10 (d,  $J = 7.7$  Hz, 1H), 6.92 (s, 1H), 2.40 (s, 3H).  $^{13}\text{C NMR}$  (101 MHz,  $\text{CDCl}_3$ )  $\delta$  194.1,

193.0, 147.6, 144.3, 137.5, 136.9, 136.9, 136.4, 134.0, 133.8, 133.0, 130.1, 129.7, 129.6, 129.3, 129.0, 128.9, 128.8, 128.7,

126.8, 124.8, 120.0, 106.8, 87.8, 21.3. IR (KBr,  $\text{cm}^{-1}$ ) 3068, 3026, 2933, 1712, 1676, 1576, 1446, 1357, 1260, 1118, 970,

761. HRMS (ESI) ( $[\text{M}+\text{Na}]^+$ ) Calcd. for  $[\text{C}_{31}\text{H}_{22}\text{NaO}_2]^+$ : 449.1512, Found. 449.1510.

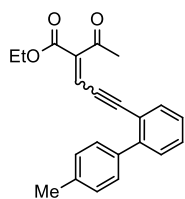

**Ethyl 2-acetyl-5-(4'-methyl-[1,1'-biphenyl]-2-yl)pent-2-en-4-ynoate (5i)** Yield: 74%,  $E/Z = 1.25:1$ ,

yellow oil,  $R_f = 0.3$  (petroleum ether/AcOEt = 10:1).  $^1\text{H NMR}$  (400 MHz,  $\text{CDCl}_3$ )  $\delta$  7.47 (dd,  $J = 7.6$ ,

3.6 Hz, 1H), 7.35 – 7.28 (m, 4H), 7.19 (dd,  $J = 9.8, 4.6$  Hz, 1H), 7.13 (d,  $J = 7.9$  Hz, 2H), 6.82 (d,  $J =$

2.6 Hz, 1H), 4.10 (dq,  $J = 28.1, 7.1$  Hz, 2H), 2.30 (s, 3H), 2.25 (s, 1H), 2.13 (s, 2H), 1.16 (dt,  $J = 14.2$ ,

7.1 Hz, 3H).  $^{13}\text{C NMR}$  (101 MHz,  $\text{CDCl}_3$ )  $\delta$  198.7, 194.0, 165.3, 163.9, 144.7, 144.5, 141.9, 140.8, 137.6, 137.1, 137.0,

133.9, 130.2, 130.2, 129.8, 129.7, 129.0, 127.0, 127.0, 124.7, 123.0, 120.2, 106.9, 105.4, 88.0, 87.4, 61.6, 61.5, 30.2, 27.6,

21.2, 14.2, 14.1. IR (KBr,  $\text{cm}^{-1}$ ) 3022, 2983, 1716, 1581, 1475, 1368, 1248, 1061, 952, 822, 761. HRMS (ESI) ( $[\text{M}+\text{Na}]^+$ )

Calcd. for  $[\text{C}_{22}\text{H}_{20}\text{NaO}_3]^+$ : 355.1305, Found. 355.1309.

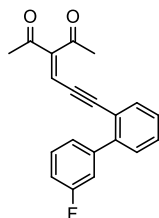

**3-(3-(3'-Fluoro-[1,1'-biphenyl]-2-yl)prop-2-yn-1-ylidene)pentane-2,4-dione (5j)** Yield: 59%, yellow

oil,  $R_f = 0.3$  (petroleum ether/AcOEt = 10:1).  $^1\text{H NMR}$  (400 MHz,  $\text{CDCl}_3$ )  $\delta$  7.59 (d,  $J = 7.5$  Hz, 1H),

7.46 (q,  $J = 6.9, 5.9$  Hz, 1H), 7.38 (q,  $J = 8.5, 7.9$  Hz, 3H), 7.27 (d,  $J = 7.6$  Hz, 1H), 7.20 (d,  $J = 9.7$  Hz,

1H), 7.13 – 7.06 (m, 1H), 6.83 (s, 1H), 2.30 (s, 3H), 2.24 (s, 3H).  $^{19}\text{F NMR}$  (376 MHz,  $\text{CDCl}_3$ )  $\delta$  -113.0.

$^{13}\text{C NMR}$  (101 MHz,  $\text{CDCl}_3$ )  $\delta$  200.8, 195.5, 162.6 (d,  $J = 246.2$  Hz), 149.2, 143.2 (d,  $J = 2.0$  Hz), 142.1

(d,  $J = 7.8$  Hz), 133.9, 130.4, 129.9 (d,  $J = 8.3$  Hz), 129.7, 127.8, 125.0 (d,  $J = 2.9$  Hz), 121.9, 120.1, 116.1 (d,  $J = 22.0$  Hz),

114.8 (d,  $J = 21.0$  Hz), 106.3, 88.0, 30.6, 27.4. IR (KBr,  $\text{cm}^{-1}$ ) 3063, 2924, 1711, 1691, 1581, 1473, 1371, 1246, 1180, 1023,

959, 879, 763. HRMS (ESI) ( $[\text{M}+\text{Na}]^+$ ) Calcd. for  $[\text{C}_{20}\text{H}_{15}\text{FNaO}_2]^+$ : 329.0948, Found. 329.0944.

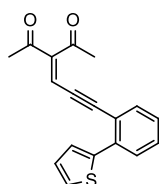

**3-(3-(2-(Thiophen-2-yl)phenyl)prop-2-yn-1-ylidene)pentane-2,4-dione (5k)** Yield: 66%, yellow oil,

$R_f = 0.3$  (petroleum ether/AcOEt = 10:1).  $^1\text{H NMR}$  (400 MHz,  $\text{CDCl}_3$ )  $\delta$  7.55 (d,  $J = 7.9$  Hz, 2H), 7.45 –

7.35 (m, 3H), 7.28 (t,  $J = 8.0$  Hz, 1H), 7.12 (t,  $J = 4.3$  Hz, 1H), 6.93 (s, 1H), 2.38 (s, 3H), 2.33 (s, 3H).

$^{13}\text{C NMR}$  (101 MHz,  $\text{CDCl}_3$ )  $\delta$  201.0, 195.6, 149.2, 141.2, 136.9, 134.3, 130.4, 129.5, 127.7, 127.4, 127.3,

126.5, 122.1, 119.4, 106.9, 89.0, 30.8, 27.4. IR (KBr,  $\text{cm}^{-1}$ ) 3026, 2954, 1710, 1667, 1574, 1476, 1369, 1243, 1175, 1022,

953, 851, 761. HRMS (ESI) ( $[\text{M}+\text{Na}]^+$ ) Calcd. for  $[\text{C}_{18}\text{H}_{14}\text{NaO}_2\text{S}]^+$ : 317.0607, Found. 317.0603.



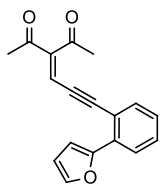

**3-(3-(2-(Furan-2-yl)phenyl)prop-2-yn-1-ylidene)pentane-2,4-dione (51)** Yield: 68%, yellow oil,  $R_f = 0.3$  (petroleum ether/AcOEt = 10:1).  $^1\text{H NMR}$  (400 MHz, Chloroform- $d$ )  $\delta$  7.81 (d,  $J = 8.0$  Hz, 1H), 7.53 – 7.50 (m, 2H), 7.43 (t,  $J = 7.7$  Hz, 1H), 7.24 (t,  $J = 7.5$  Hz, 1H), 7.11 (d,  $J = 3.4$  Hz, 1H), 6.99 (s, 1H), 6.53 (s, 1H), 2.50 (s, 3H), 2.37 (s, 3H).  $^{13}\text{C NMR}$  (101 MHz,  $\text{CDCl}_3$ )  $\delta$  201.0, 195.5, 151.4, 149.4, 142.6, 134.4, 132.5, 130.4, 126.9, 126.0, 121.9, 116.7, 111.9, 110.0, 106.9, 89.0, 31.0, 27.3. IR (KBr,  $\text{cm}^{-1}$ ) 3028, 2924, 1709, 1666, 1579, 1496, 1372, 1244, 1176, 1008, 956, 762. HRMS (ESI) ( $[\text{M}+\text{H}]^+$ ) Calcd. for  $[\text{C}_{18}\text{H}_{15}\text{O}_3]^+$ : 279.1016, Found. 279.1018.

## 5. General procedure for Büchner reaction.

Under N<sub>2</sub> atmosphere, to a solution of enynones **1** (0.2 mmol) in dry DCE (0.1 M) at -20 °C, Rh<sub>2</sub>(S-BTPCP)<sub>4</sub> (0.01 eq. the catalyst was dissolved in DCE) were added. The reaction mixture was then stirred for 30 hours at -20 °C. After the reaction was completed, the reaction mixture was filtered through short silica gel, and then the solvent was removed under reduced pressure. The crude aromatic substitution product was purified by flash column chromatography (silica gel, petroleum ether/AcOEt = 10:1) to yield **2a – 2p** (the products were stored in fridge and keep in dark place with aluminum foil).

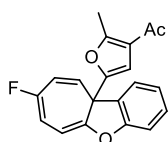

**1-(5-(8-Fluoro-10aH-cyclohepta[b]benzofuran-10a-yl)-2-methylfuran-3-yl)ethanone (2a)** Yield:

99%, yellow oil, R<sub>f</sub> = 0.3 (petroleum ether/AcOEt = 10:1). <sup>1</sup>H NMR (400 MHz, CDCl<sub>3</sub>) δ 7.36 (d, J = 7.6 Hz, 1H), 7.24 (t, J = 7.9 Hz, 1H), 7.03 (t, J = 7.7 Hz, 1H), 6.97 (d, J = 8.1 Hz, 1H), 6.32 (t, J = 9.6 Hz, 1H), 6.17 – 6.06 (m, 3H), 5.65 – 5.57 (m, 1H), 2.35 (s, 3H), 2.21 (s, 3H). <sup>19</sup>F NMR (376 MHz, CDCl<sub>3</sub>) δ -105.3. <sup>13</sup>C NMR (101 MHz, CDCl<sub>3</sub>) δ 194.0, 158.6, 157.8 (d, J = 238.2 Hz), 156.1, 149.3 (d, J = 3.2 Hz), 148.5, 130.9, 129.4, 124.0, 123.2, 121.9 (d, J = 12.7 Hz), 121.7, 121.4 (d, J = 19.4 Hz), 110.3, 107.6 (d, J = 29.9 Hz), 107.3, 97.4 (d, J = 11.4 Hz), 51.6, 29.0, 14.5. IR (KBr, cm<sup>-1</sup>) 3035, 2922, 1711, 1661, 1570, 1483, 1363 1244, 1017, 951, 847, 758. HRMS (ESI) ([M+H]<sup>+</sup>) Calcd. for [C<sub>20</sub>H<sub>16</sub>FO<sub>3</sub>]<sup>+</sup>: 323.1078, Found. 323.1080. HPLC: OD-H column, 95:5 hexane:isopropanol, 1.00 mL/min, t<sub>R</sub> = major: 7.2 min, minor: 6.8 min. 96% ee. [α]<sub>D</sub><sup>24</sup> -132.3° (c 0.83, CH<sub>2</sub>Cl<sub>2</sub>).

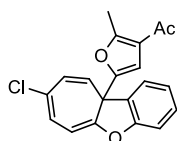

**1-(5-(8-Chloro-10aH-cyclohepta[b]benzofuran-10a-yl)-2-methylfuran-3-yl)ethanone (2b)** Yield:

97%, yellow oil, R<sub>f</sub> = 0.3 (petroleum ether/AcOEt = 10:1). <sup>1</sup>H NMR (500 MHz, CDCl<sub>3</sub>) δ 7.38 – 7.30 (m, 2H), 7.12 (t, J = 7.5 Hz, 1H), 7.08 (d, J = 8.1 Hz, 1H), 6.77 (d, J = 7.4 Hz, 1H), 6.53 (d, J = 10.0 Hz, 1H), 6.20 (s, 1H), 6.15 (d, J = 7.5 Hz, 1H), 5.45 (d, J = 10.0 Hz, 1H), 2.40 (s, 3H), 2.32 (s, 3H). <sup>13</sup>C NMR (126 MHz, CDCl<sub>3</sub>) δ 194.1, 158.7, 156.2, 153.4, 147.8, 130.7, 130.6, 129.5, 128.5, 124.0, 123.5, 121.4, 120.7, 118.5, 110.4, 107.7, 100.4, 51.8, 29.1, 14.5. IR (KBr, cm<sup>-1</sup>) 3058, 2926, 1762, 1715, 1672, 1584, 1486, 1450, 1334, 1241, 1093, 935, 839, 759. HRMS (ESI) ([M+H]<sup>+</sup>) Calcd. for [C<sub>20</sub>H<sub>16</sub>ClO<sub>3</sub>]<sup>+</sup>: 339.0782, Found. 339.0787. HPLC: OD-H column, 99:1 hexane:isopropanol, 1.00 mL/min, t<sub>R</sub> = major: 11.8 min, minor: 10.8 min. 98% ee. [α]<sub>D</sub><sup>24</sup> -128.2° (c 1.17, CH<sub>2</sub>Cl<sub>2</sub>).

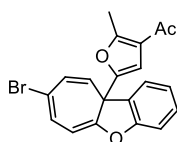

**1-(5-(8-Bromo-10aH-cyclohepta[b]benzofuran-10a-yl)-2-methylfuran-3-yl)ethanone (2c)** Yield:

99%, yellow oil, R<sub>f</sub> = 0.3 (petroleum ether/AcOEt = 10:1). <sup>1</sup>H NMR (500 MHz, CDCl<sub>3</sub>) δ 7.38 (d, J = 7.5 Hz, 1H), 7.33 (t, J = 7.9 Hz, 1H), 7.12 (t, J = 7.3 Hz, 1H), 7.07 (d, J = 8.1 Hz, 1H), 6.62 – 6.55 (m, 1H), 6.41 (d, J = 10.0 Hz, 1H), 6.27 – 6.17 (m, 2H), 5.55 (d, J = 10.0 Hz, 1H), 2.41 (s, 3H), 2.31 (s, 3H). <sup>13</sup>C NMR (126 MHz, CDCl<sub>3</sub>) δ 194.0, 158.6, 156.1, 152.7, 148.1, 130.8, 129.5, 129.4, 128.7, 125.0, 124.0, 123.4, 121.5, 120.8, 110.4, 107.5, 99.6, 51.7, 29.1, 14.5. IR (KBr, cm<sup>-1</sup>) 3035, 2931, 1772, 1714, 1581, 1484, 1449, 1334, 1241, 1148, 1009, 933, 837, 758. HRMS (ESI) ([M+H]<sup>+</sup>) Calcd. for [C<sub>20</sub>H<sub>16</sub>BrO<sub>3</sub>]<sup>+</sup>: 383.0277, Found. 383.0278. HPLC: OD-H column, 99:1 hexane:isopropanol, 1.00 mL/min, t<sub>R</sub> = major: 11.8 min, minor: 11.2 min. 98% ee. [α]<sub>D</sub><sup>24</sup> -114.3° (c 1.33, CH<sub>2</sub>Cl<sub>2</sub>).

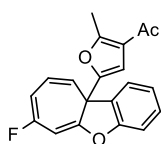

**1-(5-(7-Fluoro-10aH-cyclohepta[b]benzofuran-10a-yl)-2-methylfuran-3-yl)ethanone (2d)** Yield:

95%, yellow oil,  $R_f = 0.3$  (petroleum ether/AcOEt = 10:1).  $^1\text{H NMR}$  (400 MHz,  $\text{CDCl}_3$ )  $\delta$  7.43 (d,  $J = 7.6$  Hz, 1H), 7.33 (t,  $J = 7.7$  Hz, 1H), 7.16 – 7.07 (m, 2H), 6.38 – 6.26 (m, 2H), 6.19 (s, 1H), 6.10 (dd,  $J = 17.2, 7.0$  Hz, 1H), 5.42 (d,  $J = 9.8$  Hz, 1H), 2.42 (s, 3H), 2.30 (s, 3H).  $^{19}\text{F NMR}$  (376 MHz,  $\text{CDCl}_3$ )  $\delta$  -97.8.  $^{13}\text{C NMR}$  (101 MHz,  $\text{CDCl}_3$ )  $\delta$  194.0, 157.7, 157.2 (d,  $J = 265.8$  Hz), 154.0 (d,  $J = 19.0$  Hz), 148.2, 131.2, 129.3, 124.6 (d,  $J = 11.9$  Hz), 124.0, 123.7, 121.6, 119.4, 116.8 (d,  $J = 2.6$  Hz), 110.4, 107.4, 106.6 (d,  $J = 28.5$  Hz), 96.2 (d,  $J = 41.2$  Hz), 52.3, 29.1, 14.5. IR (KBr,  $\text{cm}^{-1}$ ) 3030, 2921, 1710, 1663, 1578, 1482, 1359 1241, 956, 855, 761. HRMS (ESI) ( $[\text{M}+\text{H}]^+$ ) Calcd. for  $[\text{C}_{20}\text{H}_{16}\text{FO}_3]^+$ : 323.1078, Found. 323.1077. HPLC: OD-H column, 99:1 hexane:isopropanol, 1.00 mL/min,  $t_R =$  major: 13.5 min, minor: 9.1 min. 90% ee.  $[\alpha]_D^{24} -95.6^\circ$  (c 1.5,  $\text{CH}_2\text{Cl}_2$ ).

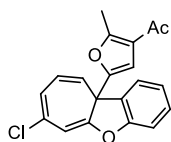

**1-(5-(7-Chloro-10aH-cyclohepta[b]benzofuran-10a-yl)-2-methylfuran-3-yl)ethanone (2e)** Yield:

92%, yellow oil,  $R_f = 0.3$  (petroleum ether/AcOEt = 10:1).  $^1\text{H NMR}$  (500 MHz,  $\text{CDCl}_3$ )  $\delta$  7.47 (dd,  $J = 7.6, 1.3$  Hz, 1H), 7.32 (td,  $J = 7.8, 1.4$  Hz, 1H), 7.13 (t,  $J = 7.6$  Hz, 1H), 7.08 (d,  $J = 8.2$  Hz, 1H), 6.50 (dd,  $J = 7.0, 1.4$  Hz, 1H), 6.37 (s, 1H), 6.29 (dd,  $J = 9.6, 7.0$  Hz, 1H), 6.15 (s, 1H), 5.56 (d,  $J = 9.7$  Hz, 1H), 2.44 (s, 3H), 2.30 (s, 3H).  $^{13}\text{C NMR}$  (126 MHz,  $\text{CDCl}_3$ )  $\delta$  194.0, 158.5, 155.9, 152.8, 148.1, 132.1, 131.0, 129.4, 125.8, 124.1, 124.0, 123.6, 121.5, 120.2, 110.5, 107.2, 103.8, 52.0, 29.1, 14.5. IR (KBr,  $\text{cm}^{-1}$ ) 2924, 2887, 1712, 1668, 1582, 1483, 1449, 1336, 1241, 1022, 955, 847, 758. HRMS (ESI) ( $[\text{M}+\text{Na}]^+$ ) Calcd. for  $[\text{C}_{20}\text{H}_{15}\text{ClNaO}_3]^+$ : 361.0602, Found. 361.0597. HPLC: OD-H column, 99:1 hexane:isopropanol, 1.00 mL/min,  $t_R =$  major: 12.85 min, minor: 9.0 min. 89% ee.  $[\alpha]_D^{24} -100.7^\circ$  (c 1.5,  $\text{CH}_2\text{Cl}_2$ ).

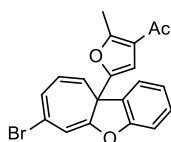

**1-(5-(7-Bromo-10aH-cyclohepta[b]benzofuran-10a-yl)-2-methylfuran-3-yl)ethanone (2f)** Yield:

97%, yellow oil,  $R_f = 0.3$  (petroleum ether/AcOEt = 10:1).  $^1\text{H NMR}$  (500 MHz,  $\text{CDCl}_3$ )  $\delta$  7.49 (d,  $J = 7.6$  Hz, 1H), 7.32 (td,  $J = 7.8, 1.3$  Hz, 1H), 7.14 (td,  $J = 7.5, 1.0$  Hz, 1H), 7.07 (d,  $J = 8.1$  Hz, 1H), 6.71 (d,  $J = 6.9$  Hz, 1H), 6.50 (s, 1H), 6.21 (dd,  $J = 9.6, 6.9$  Hz, 1H), 6.15 (s, 1H), 5.61 (d,  $J = 9.6$  Hz, 1H), 2.45 (s, 3H), 2.31 (s, 3H).  $^{13}\text{C NMR}$  (126 MHz,  $\text{CDCl}_3$ )  $\delta$  194.1, 158.5, 155.8, 152.5, 147.9, 130.9, 129.4, 127.7, 126.4, 124.1, 123.6, 121.4, 121.2, 121.0, 110.5, 107.3, 106.0, 52.1, 29.1, 14.5. IR (KBr,  $\text{cm}^{-1}$ ) 3031, 2928, 1710, 1579, 1480, 1446, 1332, 1237, 1145, 1022, 956, 848, 754. HRMS (ESI) ( $[\text{M}+\text{Na}]^+$ ) Calcd. for  $[\text{C}_{20}\text{H}_{15}\text{BrNaO}_3]^+$ : 405.0097, Found. 405.0093. HPLC: OD-H column, 99:1 hexane:isopropanol, 1.00 mL/min,  $t_R =$  major: 12.7 min, minor: 9.3 min. 90% ee.  $[\alpha]_D^{24} -91.5^\circ$  (c 1.2,  $\text{CH}_2\text{Cl}_2$ ).

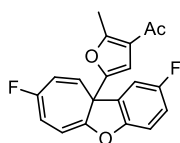

**1-(5-(2,8-Difluoro-10aH-cyclohepta[b]benzofuran-10a-yl)-2-methylfuran-3-yl)ethanone (2g)**

Yield: 99%, yellow oil,  $R_f = 0.3$  (petroleum ether/AcOEt = 10:1).  $^1\text{H NMR}$  (400 MHz,  $\text{CDCl}_3$ )  $\delta$  7.13 (d,  $J = 7.5$  Hz, 1H), 7.05 – 6.93 (m, 2H), 6.44 – 6.37 (m, 1H), 6.24 – 6.11 (m, 3H), 5.64 (dd,  $J = 10.3,$

4.6 Hz, 1H), 2.44 (s, 3H), 2.29 (s, 3H).  $^{19}\text{F}$  NMR (376 MHz,  $\text{CDCl}_3$ )  $\delta$  -105.1, -119.6.  $^{13}\text{C}$  NMR (101 MHz,  $\text{CDCl}_3$ )  $\delta$  193.6, 158.9 (d,  $J = 241.6$  Hz), 158.6, 157.7 (d,  $J = 238.9$  Hz), 152.1 (d,  $J = 1.5$  Hz), 149.5 (d,  $J = 3.4$  Hz), 147.9, 132.1 (d,  $J = 8.4$  Hz), 121.9, 121.6 (d,  $J = 9.8$  Hz), 121.1 (d,  $J = 13.1$  Hz), 116.1 (d,  $J = 24.7$  Hz), 111.2 (d,  $J = 25.4$  Hz), 110.9 (d,  $J = 8.5$  Hz), 107.62 (d,  $J = 30.0$  Hz), 107.6, 97.7 (d,  $J = 11.5$  Hz), 52.0, 28.9, 14.4. IR (KBr,  $\text{cm}^{-1}$ ) 2975, 2930, 1710, 1481, 1372, 1303, 1235, 1159, 952, 818. HRMS (ESI) ( $[\text{M}+\text{Na}]^+$ ) Calcd. for  $[\text{C}_{20}\text{H}_{14}\text{F}_2\text{NaO}_3]^+$ : 363.0803, Found. 363.0803. HPLC: OD-H column, 99:1 hexane:isopropanol, 1.00 mL/min,  $t_{\text{R}}$  = major: 12.3 min, minor: 10.5 min. 97% ee.  $[\alpha]_{\text{D}}^{24}$  -114.9° (c 0.8,  $\text{CH}_2\text{Cl}_2$ ).

**1-(5-(2-Chloro-8-fluoro-10a*H*-cyclohepta[*b*]benzofuran-10a-yl)-2-methylfuran-3-yl)ethanone**

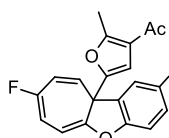

**(2h)** Yield: 92%, yellow oil,  $R_{\text{f}} = 0.3$  (petroleum ether/AcOEt = 10:1).  $^1\text{H}$  NMR (400 MHz,  $\text{CDCl}_3$ )  $\delta$

7.38 (s, 1H), 7.27 (d,  $J = 8.3$  Hz, 1H), 6.97 (d,  $J = 8.6$  Hz, 1H), 6.44 – 6.37 (m, 1H), 6.24 – 6.11 (m,

3H), 5.65 (dd,  $J = 10.4, 5.1$  Hz, 1H), 2.44 (s, 3H), 2.29 (s, 3H).  $^{19}\text{F}$  NMR (376 MHz,  $\text{CDCl}_3$ )  $\delta$  -104.7.  $^{13}\text{C}$  NMR (126 MHz,  $\text{CDCl}_3$ )  $\delta$  193.8, 158.8, 157.8 (d,  $J = 239.0$  Hz), 154.7, 149.1 (d,  $J = 3.3$  Hz), 147.8, 132.5, 129.5, 128.1, 124.3, 122.0, 121.6 (d,  $J = 12.0$  Hz), 121.2 (d,  $J = 12.8$  Hz), 111.4, 107.64, 107.6 (d,  $J = 30.0$  Hz), 97.9 (d,  $J = 11.5$  Hz), 51.7, 29.1, 14.6. IR (KBr,  $\text{cm}^{-1}$ ) 2973, 2933, 2887, 1466, 1376, 1306, 1160, 1130, 952, 817. HRMS (ESI) ( $[\text{M}+\text{Na}]^+$ ) Calcd. for  $[\text{C}_{20}\text{H}_{14}\text{ClFN}_3\text{O}_3]^+$ : 379.0508, Found. 379.0512. HPLC: OD-H column, 99:1 hexane:isopropanol, 1.00 mL/min,  $t_{\text{R}}$  = major: 10.7 min, minor: 9.8 min. 96% ee.  $[\alpha]_{\text{D}}^{24}$  -125.2° (c 0.5,  $\text{CH}_2\text{Cl}_2$ ).

**1-(5-(8-Fluoro-2-methyl-10a*H*-cyclohepta[*b*]benzofuran-10a-yl)-2-methylfuran-3-yl)ethanone**

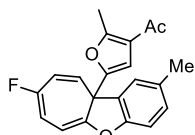

**(2i)** Yield: 99%, yellow oil,  $R_{\text{f}} = 0.3$  (petroleum ether/AcOEt = 10:1).  $^1\text{H}$  NMR (400 MHz,  $\text{CDCl}_3$ )  $\delta$

7.21 (s, 1H), 7.10 (d,  $J = 8.4$  Hz, 1H), 6.93 (d,  $J = 8.1$  Hz, 1H), 6.39 (t,  $J = 9.6$  Hz, 1H), 6.23 – 6.11

(m, 3H), 5.66 (dd,  $J = 10.7, 4.5$  Hz, 1H), 2.43 (s, 3H), 2.35 (s, 3H), 2.30 (s, 3H).  $^{19}\text{F}$  NMR (376 MHz,  $\text{CDCl}_3$ )  $\delta$  -105.7.  $^{13}\text{C}$  NMR (101 MHz,  $\text{CDCl}_3$ )  $\delta$  194.0, 158.5, 157.7 (d,  $J = 238.0$  Hz), 154.1, 149.7 (d,  $J = 3.8$  Hz), 148.7, 132.8, 130.8, 129.9, 124.3, 121.8 (d,  $J = 12.6$  Hz), 121.6 (d,  $J = 8.5$  Hz), 121.3, 109.9, 107.6 (d,  $J = 29.7$  Hz), 107.2, 97.2 (d,  $J = 11.6$  Hz), 51.7, 29.1, 21.0, 14.6. IR (KBr,  $\text{cm}^{-1}$ ) 2972, 2933, 2886, 1768, 1704, 1465, 1377, 1306, 1160, 1129, 951, 817. HRMS (ESI) ( $[\text{M}+\text{Na}]^+$ ) Calcd. for  $[\text{C}_{21}\text{H}_{17}\text{FN}_3\text{O}_3]^+$ : 359.1054, Found. 359.1060. HPLC: OD-H column, 99:1 hexane:isopropanol, 1.00 mL/min,  $t_{\text{R}}$  = major: 9.3 min, minor: 8.8 min. 97% ee.  $[\alpha]_{\text{D}}^{24}$  -127.2° (c 1.0,  $\text{CH}_2\text{Cl}_2$ ).

**1-(2-Ethyl-5-(8-fluoro-10a*H*-cyclohepta[*b*]benzofuran-10a-yl)furan-3-yl)propan-1-one (2j)** Yield:

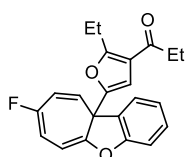

95%, yellow oil,  $R_{\text{f}} = 0.3$  (petroleum ether/AcOEt = 10:1).  $^1\text{H}$  NMR (500 MHz,  $\text{CDCl}_3$ )  $\delta$  7.46 (dd,  $J = 7.5, 1.2$  Hz, 1H), 7.31 (td,  $J = 7.8, 1.3$  Hz, 1H), 7.11 (t,  $J = 7.5$  Hz, 1H), 7.05 (d,  $J = 8.1$  Hz, 1H), 6.43 – 6.34 (m, 1H), 6.23 – 6.15 (m, 2H), 6.13 (s, 1H), 5.70 (dd,  $J = 10.3, 4.6$  Hz, 1H), 2.86 (ddq,  $J = 30.1,$

15.1, 7.5 Hz, 2H), 2.67 – 2.56 (m, 2H), 1.09 (dt,  $J = 11.8, 7.4$  Hz, 6H).  $^{19}\text{F}$  NMR (376 MHz,  $\text{CDCl}_3$ )  $\delta$  -105.3.  $^{13}\text{C}$  NMR (126 MHz,  $\text{CDCl}_3$ )  $\delta$  196.9, 163.3, 157.8 (d,  $J = 238.1$  Hz), 156.1, 149.2 (d,  $J = 3.3$  Hz), 148.4, 130.9, 129.4, 124.0, 123.2, 122.2 (d,  $J = 12.9$  Hz), 121.4 (d,  $J = 36.1$  Hz), 119.9, 110.3, 107.5 (d,  $J = 30.0$  Hz), 106.8, 97.4 (d,  $J = 11.6$  Hz), 51.6, 34.3, 21.7, 11.8, 7.7. IR (KBr,  $\text{cm}^{-1}$ ) 2975, 2888, 1706, 1552, 1464, 1376, 1305, 1242, 1159, 1130, 951, 817, 756. HRMS (ESI) ( $[\text{M}+\text{Na}]^+$ ) Calcd. for  $[\text{C}_{22}\text{H}_{19}\text{FNaO}_3]^+$ : 373.1210, Found. 373.1205. HPLC: OD-H column, 99:1 hexane:isopropanol, 1.00 mL/min,  $t_{\text{R}}$  = major: 7.2 min, minor: 6.6 min. 90% ee.  $[\alpha]_{\text{D}}^{24}$  -88.7° (c 0.8,  $\text{CH}_2\text{Cl}_2$ ).

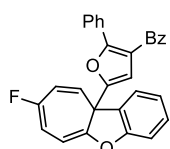

**(5-(8-Fluoro-10aH-cyclohepta[b]benzofuran-10a-yl)-2-phenylfuran-3-yl)(phenyl)methanone (2k)**

Yield: 98%, yellow oil,  $R_{\text{f}} = 0.3$  (petroleum ether/AcOEt = 10:1).  $^1\text{H}$  NMR (400 MHz,  $\text{CDCl}_3$ )  $\delta$  7.72 (d,  $J = 7.7$  Hz, 2H), 7.60 – 7.52 (m, 3H), 7.48 (t,  $J = 7.4$  Hz, 1H), 7.39 – 7.30 (m, 3H), 7.26 – 7.21 (m, 3H), 7.13 (t,  $J = 7.5$  Hz, 1H), 7.06 (d,  $J = 8.1$  Hz, 1H), 6.41 (t,  $J = 9.5$  Hz, 1H), 6.29 – 6.19 (m, 3H), 5.75 (dd,  $J = 10.4, 4.6$  Hz, 1H).  $^{19}\text{F}$  NMR (376 MHz,  $\text{CDCl}_3$ )  $\delta$  -105.1.  $^{13}\text{C}$  NMR (126 MHz,  $\text{CDCl}_3$ )  $\delta$  191.4, 157.9 (d,  $J = 238.4$  Hz), 156.2, 155.8, 149.5, 149.3 (d,  $J = 3.3$  Hz), 137.9, 132.9, 130.6, 129.7, 129.6, 129.5, 129.0, 128.3, 128.2, 127.3, 124.2, 123.3, 122.1 (d,  $J = 12.9$  Hz), 121.6 (d,  $J = 36.0$  Hz), 120.8, 111.0, 110.4, 107.8 (d,  $J = 29.9$  Hz), 97.6 (d,  $J = 11.6$  Hz), 51.8. IR (KBr,  $\text{cm}^{-1}$ ) 2923, 1712, 1543, 1486, 1452, 1268, 1158, 1136, 978, 838, 758. HRMS (ESI) ( $[\text{M}+\text{Na}]^+$ ) Calcd. for  $[\text{C}_{30}\text{H}_{19}\text{FNaO}_3]^+$ : 469.1210, Found. 469.1204. HPLC: OD-H column, 99:1 hexane:isopropanol, 1.00 mL/min,  $t_{\text{R}}$  = major: 11.8 min, minor: 8.4 min. 62% ee.  $[\alpha]_{\text{D}}^{24}$  -57.1° (c 1.1,  $\text{CH}_2\text{Cl}_2$ ).

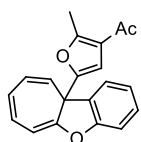

**1-(5-(10aH-cyclohepta[b]benzofuran-10a-yl)-2-methylfuran-3-yl)ethanone (2l)**

Yield: 91%, yellow oil,  $R_{\text{f}} = 0.3$  (petroleum ether/AcOEt = 10:1).  $^1\text{H}$  NMR (400 MHz,  $\text{CDCl}_3$ )  $\delta$  7.43 (d,  $J = 7.5$  Hz, 1H), 7.30 (t,  $J = 7.9$  Hz, 1H), 7.14 – 7.03 (m, 2H), 6.47 – 6.30 (m, 4H), 6.10 (s, 1H), 5.54 (d,  $J = 9.6$  Hz, 1H), 2.41 (s, 3H), 2.28 (s, 3H).  $^{13}\text{C}$  NMR (101 MHz,  $\text{CDCl}_3$ )  $\delta$  194.1, 158.2, 156.1, 151.8, 148.8, 131.7, 129.1, 127.2, 126.3, 125.3, 124.0, 123.1, 121.5, 119.3, 110.2, 107.1, 101.2, 51.9, 29.0, 14.6. IR (KBr,  $\text{cm}^{-1}$ ) 2978, 2885, 1711, 1576, 1482, 1373, 1244, 1160, 955, 818, 757. HRMS (ESI) ( $[\text{M}+\text{Na}]^+$ ) Calcd. for  $[\text{C}_{20}\text{H}_{16}\text{NaO}_3]^+$ : 327.0992, Found. 327.0986. HPLC: OD-H column, 99:1 hexane:isopropanol, 1.00 mL/min,  $t_{\text{R}}$  = major: 12.3 min, minor: 11.8 min. 94% ee.  $[\alpha]_{\text{D}}^{24}$  -64.5° (c 0.67,  $\text{CH}_2\text{Cl}_2$ ).

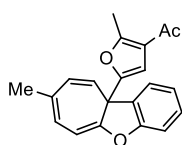

**1-(2-Methyl-5-(8-methyl-10aH-cyclohepta[b]benzofuran-10a-yl)furan-3-yl)ethanone (2m)**

Yield: 89%, yellow oil,  $R_{\text{f}} = 0.3$  (petroleum ether/AcOEt = 10:1).  $^1\text{H}$  NMR (500 MHz,  $\text{CDCl}_3$ )  $\delta$  7.38 (d,  $J = 7.5$  Hz, 1H), 7.29 (t,  $J = 7.8$  Hz, 1H), 7.11 – 7.02 (m, 2H), 6.22 (d,  $J = 9.9$  Hz, 1H), 6.20 – 6.14 (m, 2H), 6.10 (s, 1H), 5.51 (d,  $J = 9.8$  Hz, 1H), 2.40 (s, 3H), 2.29 (s, 3H), 2.01 (s, 3H).  $^{13}\text{C}$  NMR (126 MHz,  $\text{CDCl}_3$ )  $\delta$  194.1, 158.2, 156.3, 150.9, 149.6, 134.0, 131.6, 130.3, 129.1, 124.0, 123.1, 122.9, 121.5, 119.2, 110.1, 106.8, 100.5, 51.3, 29.0, 24.2, 14.5. IR (KBr,  $\text{cm}^{-1}$ ) 2975, 2934, 2888, 1710, 1467, 1376, 1247, 1160, 952, 817, 755. HRMS (ESI) ( $[\text{M}+\text{Na}]^+$ ) Calcd. for

$[C_{21}H_{18}NaO_3]^+$ : 341.1148, Found. 341.1144. HPLC: OD-H column, 99:1 hexane:isopropanol, 1.00 mL/min,  $t_R$  = major: 16.4 min, minor: 11.2 min. 75% ee.  $[\alpha]_D^{24}$  -69.0° (c 1.2,  $CH_2Cl_2$ ).

**1-(2-Methyl-5-(8-methyl-10aH-cyclohepta[b]benzofuran-10a-yl)furan-3-yl)ethanone (2o)** Yield: 94%, yellow oil,  $R_f$

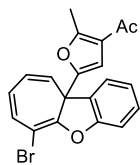

= 0.3 (petroleum ether/AcOEt = 10:1).  $^1H$  NMR (500 MHz, Chloroform-d)  $\delta$  7.38 (dd,  $J$  = 7.6, 1.3 Hz, 1H), 7.34 (td,  $J$  = 7.9, 1.4 Hz, 1H), 7.18 (d,  $J$  = 8.1 Hz, 1H), 7.14 (td,  $J$  = 7.5, 1.0 Hz, 1H), 6.53 (dd,  $J$  = 11.6, 0.9 Hz, 1H), 6.42 (dd,  $J$  = 9.8, 6.3 Hz, 1H), 6.28 (dd,  $J$  = 11.6, 6.3 Hz, 1H), 6.13 (s, 1H), 5.61 (d,  $J$  = 9.7 Hz,

1H), 2.41 (s, 3H), 2.29 (s, 3H).  $^{13}C$  NMR (126 MHz, Chloroform-d)  $\delta$  193.9, 158.5, 155.5, 148.6, 147.7, 131.8, 129.7, 129.4, 126.9, 125.7, 124.0, 123.8, 121.9, 121.6, 110.8, 107.6, 94.4, 51.8, 29.1, 14.6. HRMS (ESI) ( $[M+H]^+$ ) Calcd. for  $[C_{20}H_{16}BrO_3]^+$ : 383.0277, Found. 383.0269. HPLC: OD-H column, 99:1 hexane:isopropanol, 1.00 mL/min,  $t_R$  = major: 13.0 min, minor: 17.99 min. 70% ee.  $[\alpha]_D^{24}$  -61.0° (c 1.1,  $CH_2Cl_2$ ).

**2-(8-Bromo-10aH-cyclohepta[b]benzofuran-10a-yl)-6,6-dimethyl-6,7-dihydrobenzofuran-4(5H)-one (2p)** Yield:

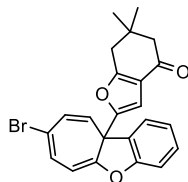

85%, yellow oil,  $R_f$  = 0.3 (petroleum ether/AcOEt = 10:1).  $^1H$  NMR (500 MHz, Chloroform-d)  $\delta$  7.42 (d,  $J$  = 7.6 Hz, 1H), 7.35 (t,  $J$  = 7.9 Hz, 1H), 7.15 (t,  $J$  = 7.6 Hz, 1H), 7.10 (d,  $J$  = 8.1 Hz, 1H), 6.80 (d,  $J$  = 7.5 Hz, 1H), 6.53 (d,  $J$  = 10.0 Hz, 1H), 6.28 (s, 1H), 6.19 (d,  $J$  = 7.6 Hz, 1H), 5.48 (d,  $J$  = 9.9 Hz, 1H), 2.61 (s, 2H), 2.30 (s, 2H), 1.09 (s, 3H), 1.06 (s, 3H).  $^{13}C$  NMR (126 MHz, Chloroform-d)  $\delta$  193.8,

166.4, 156.1, 152.9, 151.2, 130.7, 130.7, 129.5, 128.7, 124.0, 123.5, 120.6, 120.0, 118.4, 110.4, 103.4, 100.7, 51.94, 51.90, 37.3, 35.1, 28.8, 28.3. HRMS (ESI) ( $[M+Na]^+$ ) Calcd. for  $[C_{23}H_{19}BrNaO_3]^+$ : 445.0410, Found. 445.0401. HPLC: MD(2) column, 98:2 hexane:isopropanol, 0.80 mL/min,  $t_R$  = major: 18.2 min, minor: 17.4 min. 92% ee.

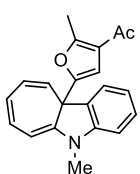

**1-(2-Methyl-5-(5-methyl-5,10a-dihydrocyclohepta[b]indol-10a-yl)furan-3-yl)ethanone (2q)** Yield: 25%

(81% yield catalyzed by  $Rh_2(TFA)_4$  and no C-H insertion product was detected), yellow oil,  $R_f$  = 0.3

(petroleum ether/AcOEt = 10:1).  $^1H$  NMR (400 MHz,  $CDCl_3$ )  $\delta$  7.46 (d,  $J$  = 7.4 Hz, 1H), 7.30 – 7.23 (m, 1H), 6.94 (t,  $J$  = 7.5 Hz, 1H), 6.74 (d,  $J$  = 7.9 Hz, 1H), 6.54 (dd,  $J$  = 11.0, 7.3 Hz, 1H), 6.36 (dd,  $J$  = 9.8, 6.5

Hz, 1H), 6.09 (dd,  $J$  = 11.0, 6.5 Hz, 1H), 6.03 (s, 1H), 5.75 (d,  $J$  = 7.4 Hz, 1H), 5.49 (d,  $J$  = 9.7 Hz, 1H), 3.26 (s, 3H), 2.41 (s, 3H), 2.26 (s, 3H).  $^{13}C$  NMR (101 MHz,  $CDCl_3$ )  $\delta$  194.2, 157.7, 149.7, 145.5, 143.6, 133.7, 128.6, 128.5, 126.7, 123.8, 121.4, 120.3, 120.2, 113.4, 107.0, 106.8, 95.2, 52.7, 30.3, 29.0, 14.6. IR (KBr,  $cm^{-1}$ ) 3032, 2974, 2887, 1708, 1483, 1377, 1245, 1160, 1130, 951, 817, 756. HRMS (ESI) ( $[M+Na]^+$ ) Calcd. for  $[C_{21}H_{19}NNaO_2]^+$ : 340.1308, Found. 340.1308. HPLC: OD-H column, 99:1 hexane:isopropanol, 1.00 mL/min,  $t_R$  = major: 19.5 min, minor: 30.0 min. 76% ee.  $[\alpha]_D^{24}$  -44.8° (c 0.5,  $CH_2Cl_2$ ).

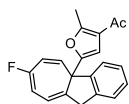

**1-(5-(7-Fluorobenzo[a]azulen-4b(10H)-yl)-2-methylfuran-3-yl)ethan-1-one (2r)** Yield: 60%, yellow oil,

$R_f = 0.4$  (petroleum ether/AcOEt = 5:1).  $^1\text{H NMR}$  (500 MHz, Chloroform- $d$ )  $\delta$  7.45 – 7.39 (m, 1H), 7.35 – 7.30 (m, 3H), 6.46 – 6.42 (m, 1H), 6.35 (ddd,  $J = 10.3, 8.2, 2.0$  Hz, 1H), 6.24 (ddd,  $J = 17.2, 7.4, 1.9$  Hz, 1H), 6.18 (s, 1H), 5.66 (dd,  $J = 10.4, 5.1$  Hz, 1H), 4.24 (d,  $J = 21.9$  Hz, 1H), 3.99 (d,  $J = 21.9$  Hz, 1H), 2.44 (s, 3H), 2.34 (s, 3H).  $^{19}\text{F NMR}$  (471 MHz, Chloroform- $d$ )  $\delta$  -102.88.  $^{13}\text{C NMR}$  (126 MHz, Chloroform- $d$ )  $\delta$  194.31, 160.50 (d,  $J_{\text{C-F}} = 242.8$  Hz), 157.9, 151.8, 147.0, 140.0, 137.8 (d,  $J_{\text{C-F}} = 3.3$  Hz), 129.5 (d,  $J_{\text{C-F}} = 13.4$  Hz), 127.8 (d,  $J_{\text{C-F}} = 21.9$  Hz), 124.6, 124.3, 121.5, 121.0, 120.7, 117.5 (d,  $J_{\text{C-F}} = 11.4$  Hz), 110.1 (d,  $J_{\text{C-F}} = 26.9$  Hz), 106.6, 55.5, 38.6, 29.0, 14.6. HRMS (ESI) ( $[\text{M}+\text{H}]^+$ ) Calcd. for  $[\text{C}_{21}\text{H}_{18}\text{FO}_2]^+$ : 321.1285, Found. 321.1287. HPLC: MD(2) column, 99:1 hexane:isopropanol, 1.00 mL/min,  $t_R =$  major: 10.8 min, minor: 10.0 min. 82% ee.

### 6. Table S3. racemization control experiments of 2c

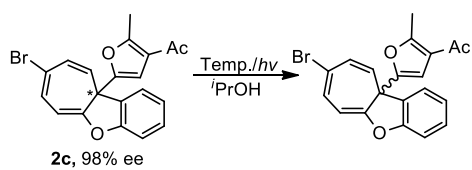

| Time | ee                 |                          |                  |               |
|------|--------------------|--------------------------|------------------|---------------|
|      | 4 °C, no <i>hν</i> | 4 °C, no <i>hν</i> (DCE) | RT, no <i>hν</i> | RT, <i>hν</i> |
| 0d   | 98%                | 98%                      | 98%              | 98%           |
| 1d   | 96%                | 96%                      | 86%              | 81%           |
| 2d   | 95.3%              | 95%                      | 75%              | 64%           |
| 3d   | 94%                | 93.5%                    | 61%              | 50%           |
| 1m   | -                  | -                        | 13%              | -             |

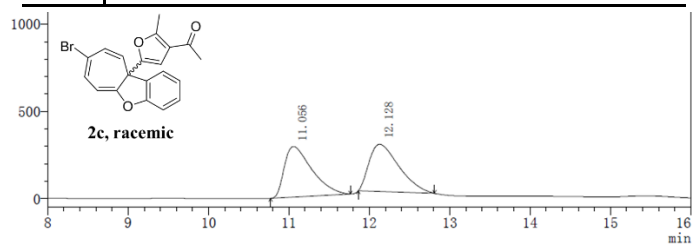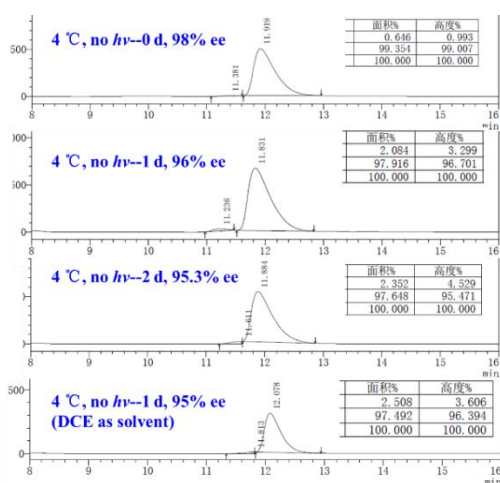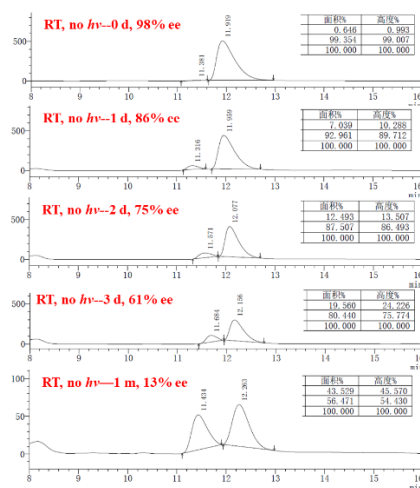



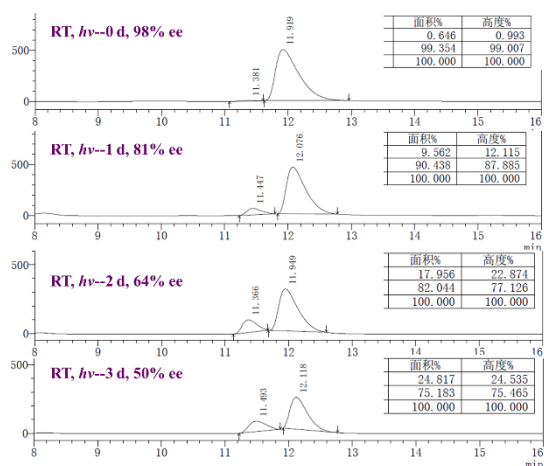

7. Table S4: the racemization of 7-substituted products with room temperature and dark condition.

**2d**

**2e**

| Time    | 2d                  | 2e                  |
|---------|---------------------|---------------------|
| 0 d     | 87% ee              | 88% ee              |
| 1 d     | 87% ee              | 88% ee              |
| 2 d     | 87% ee              | 88% ee              |
| 5 d     | 87% ee              | 88% ee              |
| 1 month | 87% ee <sup>a</sup> | 88% ee <sup>a</sup> |

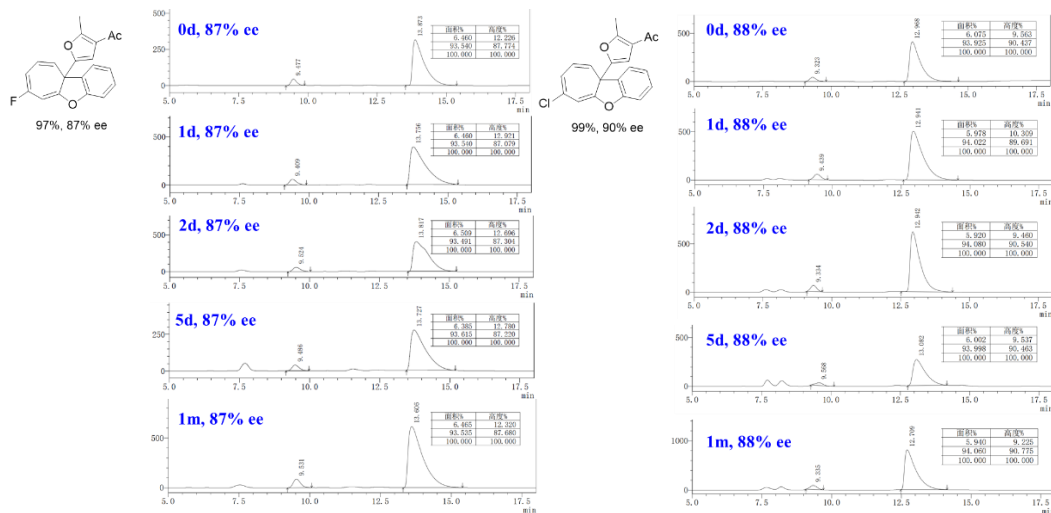

8. Scheme S3. the racemization of product 2o with room temperature and dark condition.

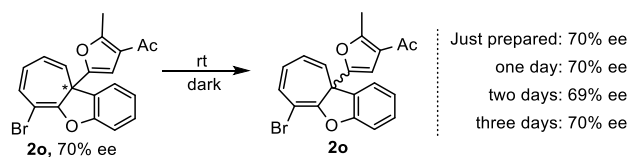

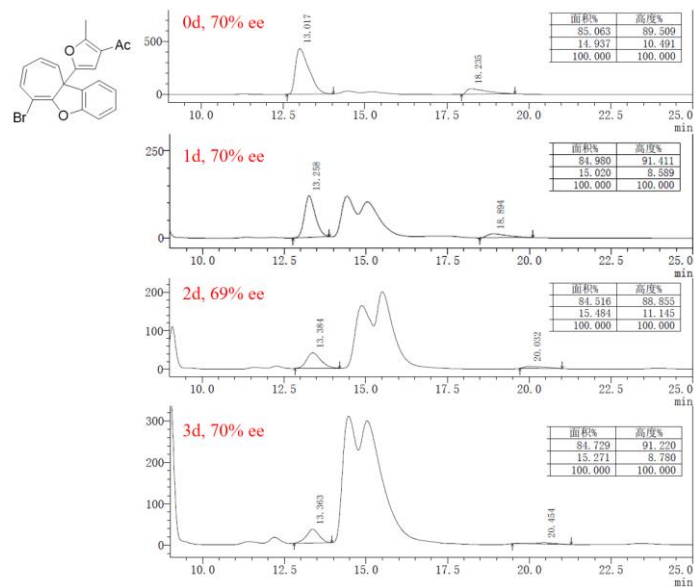

**9. Scheme S4. the decomposition of product 2o was monitored by <sup>1</sup>H NMR spectrum.**

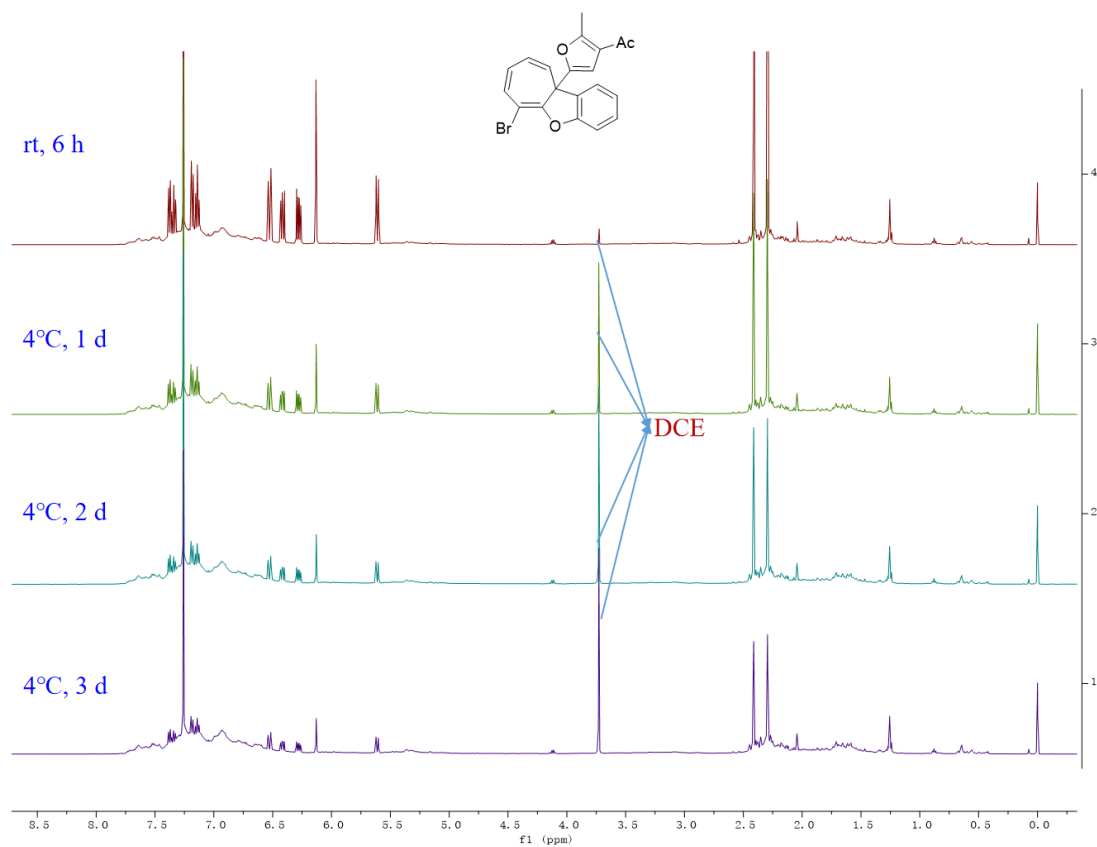

### 10. Trap of free carbene intermediate through cyclopropanation with **2c** and alkenes.

In a solution of extra dry DCM (2 mL), Büchner product **2c** (0.2 mmol) was dissolved and then the excess alkenes were added. The reaction mixture was stirred at room temperature for 10 days. The reaction was monitored by TLC and no cyclopropanation was detected.

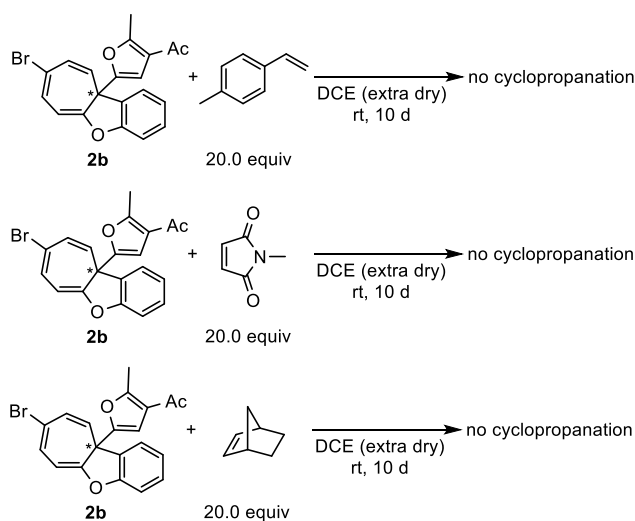

### 11. Trap of radical intermediate with **2o** and TEMPO.

In a solution of extra dry DCM (2 mL), Büchner product **2o** (0.2 mmol) was dissolved and then the TEMPO (4.0 equiv, 0.8 mmol) were added. The reaction mixture was stirred at room temperature for 36 h. The reaction was monitored by TLC, after the substrate **2o** was completely transformed, the reaction mixture was filtered through short silica gel, and then the solvent was removed under reduced pressure. The crude product was purified by flash column chromatography (silica gel, petroleum ether/AcOEt = 10:1) to yield **9** (52%).

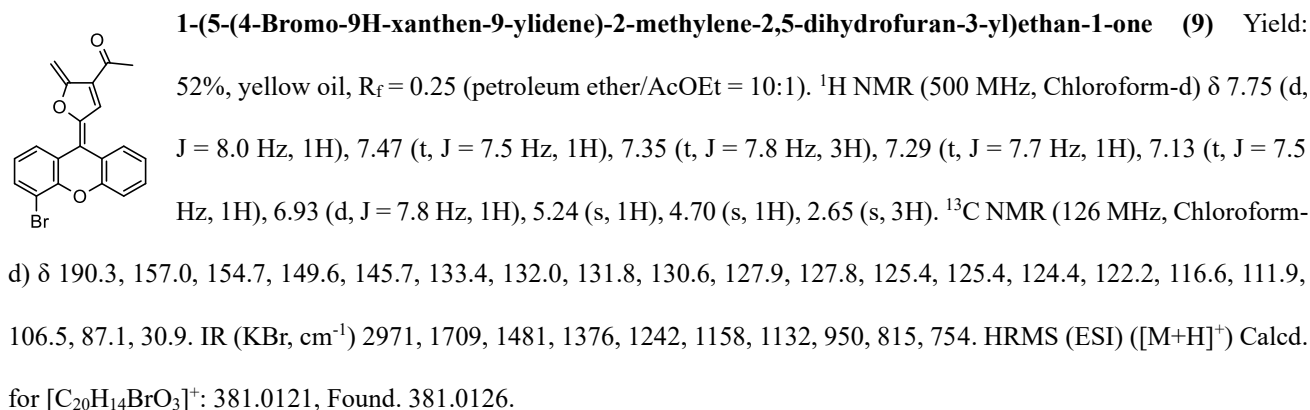

## 12. General procedure for Büchner reaction with donor-donor diazo compounds as carbene precursors.

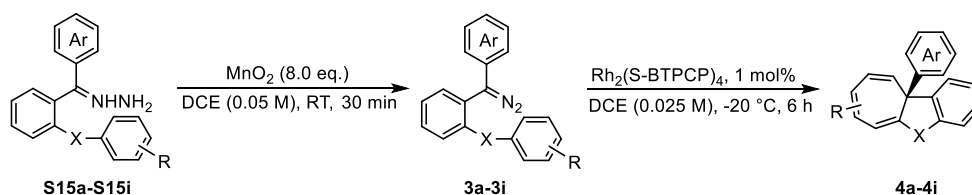

To a 25 mL oven-dried flask containing a magnetic stirring bar hydrazones **S15a-S15i** (0.2 mmol) in dry DCE (4.0 ml), was added  $\text{MnO}_2$  (141 mg, 8.0 eq) slowly, after consumption of the material in 30 minutes, the reaction mixture was filtered through alumina. The crude diazo compounds **3a-3i** were used for next step without purification. To a solution in dry DCE (4 mL, 0.05 M) at  $-20\text{ }^\circ\text{C}$ ,  $\text{Rh}_2(\text{S-BTPCP})_4$  (0.01 eq. the catalyst was dissolved in DCE) were added. Then the diazo compounds **3a-3i** in dry DCE (4 ml, 0.05 M) was added slowly for 1 hour under  $-20\text{ }^\circ\text{C}$ . The reaction mixture was then stirred for 6 hours at  $-20\text{ }^\circ\text{C}$ . After the reaction was completed, the reaction mixture was filtered through short silica gel, and then the solvent was removed under reduced pressure. The crude aromatic substitution product was purified by flash column chromatography (silica gel, petroleum ether/AcOEt = 50:1) to yield **4a – 4i**.

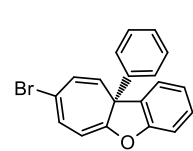

**8-Bromo-10a-phenyl-10aH-cyclohepta[b]benzofuran (4a)** Yield: 89%,  $R_f = 0.5$  (petroleum ether/AcOEt = 50:1).  $^1\text{H NMR}$  (500 MHz, Chloroform-d)  $\delta$  7.30 – 7.26 (m, 1H), 7.24 (dd,  $J = 7.6, 1.3$  Hz, 1H), 7.21 – 7.14 (m, 5H), 7.11 (d,  $J = 8.1$  Hz, 1H), 7.07 (td,  $J = 7.5, 1.0$  Hz, 1H), 6.70 (d,  $J = 7.4$

Hz, 1H), 6.62 (d,  $J = 9.9$  Hz, 1H), 6.22 (d,  $J = 7.4$  Hz, 1H), 5.66 (d,  $J = 10.0$  Hz, 1H).  $^{13}\text{C NMR}$  (126 MHz, Chloroform-d)  $\delta$  157.2, 155.5, 141.0, 134.8, 129.9, 128.9, 128.7, 127.9, 127.1, 125.8, 124.0, 123.5, 123.3, 118.5, 110.2, 99.7, 56.4. IR (KBr,  $\text{cm}^{-1}$ ) 2973, 2889, 1465, 1378, 1154, 952, 815, 704. HRMS (ESI) ( $[\text{M}+\text{H}]^+$ ) Calcd. for  $[\text{C}_{19}\text{H}_{14}\text{BrO}]^+$ : 337.0223, Found. 337.0222. HPLC: OD-H column, 99:1 hexane:isopropanol, 1.00 mL/min,  $t_R =$  major: 5.6 min, minor: 6.3 min. 99.3% ee.  $[\alpha]_D^{23} -77.3^\circ$  (c 0.9,  $\text{CH}_2\text{Cl}_2$ ).

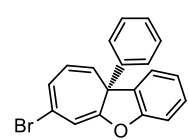

**7-Bromo-10a-phenyl-10aH-cyclohepta[b]benzofuran (4b)** Yield: 96%,  $R_f = 0.5$  (petroleum ether/AcOEt = 50:1).  $^1\text{H NMR}$  (500 MHz, Chloroform-d)  $\delta$  7.33 – 7.25 (m, 4H), 7.24 – 7.15 (m, 3H), 7.13 – 7.06 (m, 2H), 6.63 (dd,  $J = 6.7, 1.2$  Hz, 1H), 6.59 (s, 1H), 6.31 (dd,  $J = 9.6, 6.7$  Hz, 1H), 5.83 (d,

$J = 9.6$  Hz, 1H).  $^{13}\text{C NMR}$  (126 MHz, Chloroform-d)  $\delta$  156.3, 155.3, 141.1, 134.7, 128.7, 128.0, 127.1, 126.0, 125.7, 123.9, 123.7, 123.6, 121.4, 110.3, 105.2, 56.8. IR (KBr,  $\text{cm}^{-1}$ ) 2973, 2888, 1465, 1379, 1307, 1156, 952, 880, 817. HRMS (ESI) ( $[\text{M}+\text{H}]^+$ ) Calcd. for  $[\text{C}_{19}\text{H}_{14}\text{BrO}]^+$ : 337.0223, Found. 337.0222. HPLC: OD-H column, 99:1 hexane:isopropanol, 1.00 mL/min,  $t_R =$  major: 5.6 min, minor: 6.1 min. 98% ee.  $[\alpha]_D^{23} -70.1^\circ$  (c 0.8,  $\text{CH}_2\text{Cl}_2$ ).

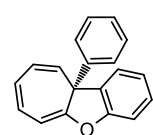

**10a-Phenyl-10aH-cyclohepta[b]benzofuran (4c)** Yield: 95%,  $R_f = 0.5$  (petroleum ether/AcOEt = 50:1).

$^1\text{H NMR}$  (500 MHz, Chloroform-d)  $\delta$  7.31 – 7.25 (m, 4H), 7.20 – 7.09 (m, 4H), 7.06 (t,  $J = 7.5$  Hz, 1H), 6.51 (dd,  $J = 9.7, 6.2$  Hz, 1H), 6.43 (d,  $J = 6.8$  Hz, 1H), 6.37 (dd,  $J = 10.9, 6.8$  Hz, 1H), 6.29 (dd,  $J = 10.9, 6.2$  Hz, 1H), 5.78 (d,  $J = 9.7$  Hz, 1H).  $^{13}\text{C NMR}$  (126 MHz, Chloroform-d)  $\delta$  155.6, 155.5, 141.9, 135.5, 128.4, 127.6, 126.7, 126.6, 126.5, 126.0, 125.5, 124.0, 123.1, 122.1, 110.1, 100.4, 56.4. IR (KBr,  $\text{cm}^{-1}$ ) 2975, 2890, 1465, 1379, 1249,

1153, 953, 818, 690. HRMS (ESI) ( $[M+H]^+$ ) Calcd. for  $[C_{19}H_{15}O]^+$ : 259.1117, Found. 259.1118. HPLC: OD-H column, 99:1 hexane:isopropanol, 1.00 mL/min,  $t_R$  = major: 5.6 min, minor: 6.2 min. 99% ee.  $[\alpha]_D^{23}$  -88.5° (c 1.0,  $CH_2Cl_2$ ).

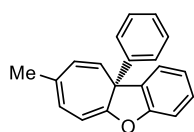

**8-Methyl-10a-phenyl-10aH-cyclohepta[b]benzofuran (4d)** Yield: 97%,  $R_f$  = 0.5 (petroleum

ether/AcOEt = 50:1).  $^1H$  NMR (500 MHz, Chloroform-d)  $\delta$  7.22 – 7.16 (m, 4H), 7.12 – 7.01 (m, 4H), 6.97 (t,  $J$  = 7.5 Hz, 1H), 6.27 (d,  $J$  = 9.9 Hz, 1H), 6.20 (d,  $J$  = 7.0 Hz, 1H), 6.04 (d,  $J$  = 7.0 Hz, 1H),

5.68 (d,  $J$  = 9.9 Hz, 1H), 1.87 (s, 3H).  $^{13}C$  NMR (126 MHz, Chloroform-d)  $\delta$  155.8, 154.9, 142.5, 135.6, 134.2, 129.7, 128.3, 127.6, 126.6, 125.9, 124.0, 123.4, 122.9, 121.9, 110.0, 99.8, 55.9, 24.0. IR (KBr,  $cm^{-1}$ ) 2975, 2889, 1466, 1377, 1309, 1157, 953, 818, 690. HRMS (ESI) ( $[M+H]^+$ ) Calcd. for  $[C_{20}H_{17}O]^+$ : 273.1274, Found. 273.1275. HPLC: OD-H column, 99:1 hexane:isopropanol, 1.00 mL/min,  $t_R$  = major: 4.7 min, minor: 7.1 min. 96% ee.  $[\alpha]_D^{23}$  -67.1° (c 0.8,  $CH_2Cl_2$ ).

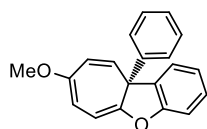

**8-Methoxy-10a-phenyl-10aH-cyclohepta[b]benzofuran (4e)** Yield: 91%,  $R_f$  = 0.5 (petroleum

ether/AcOEt = 50:1).  $^1H$  NMR (500 MHz, Chloroform-d)  $\delta$  7.26 – 7.22 (m, 4H), 7.19 – 7.14 (m, 2H), 7.14 – 7.10 (m, 1H), 7.07 – 6.99 (m, 2H), 6.36 (dd,  $J$  = 10.3, 1.8 Hz, 1H), 6.24 (d,  $J$  = 7.6 Hz, 1H),

5.92 (d,  $J$  = 10.3 Hz, 1H), 5.57 (dd,  $J$  = 7.7, 1.7 Hz, 1H), 3.48 (s, 3H).  $^{13}C$  NMR (126 MHz, Chloroform-d)  $\delta$  155.8, 155.7, 152.5, 142.3, 135.2, 128.4, 127.7, 126.7, 125.9, 125.3, 124.1, 124.0, 122.8, 109.9, 100.9, 97.9, 55.5, 55.2. IR (KBr,  $cm^{-1}$ ) 2976, 2888, 1465, 1379, 1154, 952, 819, 692. HRMS (ESI) ( $[M+H]^+$ ) Calcd. for  $[C_{20}H_{17}O_2]^+$ : 289.1223, Found. 289.1224. HPLC: OD-H column, 99:1 hexane:isopropanol, 1.00 mL/min,  $t_R$  = major: 6.6 min, minor: 7.7 min. 96% ee.  $[\alpha]_D^{23}$  -73.6° (c 1.0,  $CH_2Cl_2$ ).

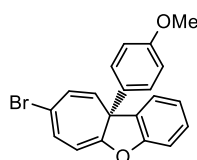

**8-Bromo-10a-(4-methoxyphenyl)-10aH-cyclohepta[b]benzofuran (4f)** Yield: 84%,  $R_f$  = 0.5

(petroleum ether/AcOEt = 50:1).  $^1H$  NMR (500 MHz, Chloroform-d)  $\delta$  7.24 – 7.21 (m, 1H), 7.18 (dd,  $J$  = 7.5, 1.3 Hz, 1H), 7.08 – 7.00 (m, 4H), 6.70 – 6.63 (m, 3H), 6.56 (d,  $J$  = 10.0 Hz, 1H), 6.15 (d,  $J$  = 7.4 Hz, 1H), 5.59 (d,  $J$  = 10.0 Hz, 1H), 3.70 (s, 3H).  $^{13}C$  NMR (126 MHz, Chloroform-d)  $\delta$  158.5,

157.4, 155.4, 135.0, 132.9, 129.9, 128.8, 128.6, 126.9, 123.9, 123.5, 123.4, 118.4, 113.3, 110.2, 99.6, 55.8, 55.1. IR (KBr,  $cm^{-1}$ ) 2974, 2889, 1465, 1380, 1308, 1155, 952, 817, 646. HRMS (ESI) ( $[M+H]^+$ ) Calcd. for  $[C_{20}H_{16}BrO_2]^+$ : 367.0328, Found. 367.0329. HPLC: OD-H column, 99:1 hexane:isopropanol, 1.00 mL/min,  $t_R$  = major: 7.8 min, minor: 8.8 min. 99.2% ee.  $[\alpha]_D^{23}$  -89.4° (c 0.8,  $CH_2Cl_2$ ).

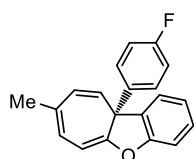

**10a-(4-Fluorophenyl)-8-methyl-10aH-cyclohepta[b]benzofuran (4g)** Yield: 99%,  $R_f$  = 0.5

(petroleum ether/AcOEt = 50:1).  $^1H$  NMR (500 MHz, Chloroform-d)  $\delta$  7.26 – 7.18 (m, 1H), 7.22 – 7.09 (m, 3H), 7.06 – 6.96 (m, 2H), 6.79 (td,  $J$  = 8.7, 2.1 Hz, 2H), 6.27 (dd,  $J$  = 9.9, 1.8 Hz, 1H), 6.20 (dd,  $J$  = 7.0, 1.9 Hz, 1H), 6.06 (d,  $J$  = 7.1 Hz, 1H), 5.66 (dd,  $J$  = 9.9, 1.9 Hz, 1H), 1.89 (s, 3H).  $^{19}F$

NMR (471 MHz, Chloroform-d)  $\delta$  -116.4.  $^{13}\text{C}$  NMR (126 MHz, Chloroform-d)  $\delta$  161.4 (d,  $J = 244.6$  Hz), 155.7, 154.8, 138.1 (d,  $J = 3.2$  Hz), 135.3, 134.2, 129.8, 128.5, 127.4 (d,  $J = 8.1$  Hz), 123.9, 123.4, 123.0, 121.7, 114.4 (d,  $J = 21.4$  Hz), 110.0, 99.8, 55.2, 24.0. IR (KBr,  $\text{cm}^{-1}$ ) 2976, 2888, 1465, 1377, 1310, 1154, 953, 817. HRMS (ESI) ( $[\text{M}+\text{H}]^+$ ) Calcd. for  $[\text{C}_{20}\text{H}_{16}\text{FO}]^+$ : 291.1180, Found. 291.1181. HPLC: OD-H column, 99:1 hexane:isopropanol, 1.00 mL/min,  $t_{\text{R}}$  = major: 4.7 min, minor: 6.3 min. 99.5% ee.  $[\alpha]_{\text{D}}^{23}$  -88.1° (c 0.7,  $\text{CH}_2\text{Cl}_2$ )

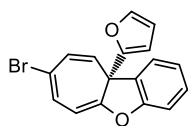

**8-Bromo-10a-(furan-2-yl)-10aH-cyclohepta[b]benzofuran (4h)** Yield: 24%,  $R_{\text{f}} = 0.5$  (petroleum

ether/AcOEt = 50:1).  $^1\text{H}$  NMR (500 MHz, Chloroform-d)  $\delta$  7.36 (dd,  $J = 7.6, 1.3$  Hz, 1H), 7.30 (td,  $J = 7.8, 1.4$  Hz, 1H), 7.18 (d,  $J = 1.6$  Hz, 1H), 7.13 – 7.04 (m, 2H), 6.75 (d,  $J = 7.6$  Hz, 1H), 6.51 (d,  $J =$

10.1 Hz, 1H), 6.18 – 6.11 (m, 2H), 5.99 (dd,  $J = 3.4, 0.9$  Hz, 1H), 5.48 (d,  $J = 10.0$  Hz, 1H).  $^{13}\text{C}$  NMR (126 MHz, Chloroform-d)  $\delta$  156.1, 153.8, 150.1, 142.6, 131.3, 130.3, 129.3, 128.5, 124.0, 123.4, 121.1, 118.4, 110.3, 109.7, 107.1, 100.2, 52.1. IR (KBr,  $\text{cm}^{-1}$ ) 2976, 2888, 1464, 1378, 1249, 1153, 954. HRMS (ESI) ( $[\text{M}+\text{H}]^+$ ) Calcd. for  $[\text{C}_{17}\text{H}_{12}\text{BrO}_2]^+$ : 327.0015, Found. 327.0016. HPLC: OD-H column, 99:1 hexane:isopropanol, 1.00 mL/min,  $t_{\text{R}}$  = major: 5.6 min, minor: 6.0 min. 22% ee.  $[\alpha]_{\text{D}}^{23}$  -27.4° (c 0.5,  $\text{CH}_2\text{Cl}_2$ ).

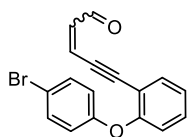

**5-(2-(4-Bromophenoxy)phenyl)pent-2-en-4-ynal (4h')** Yield: 55%,  $Z/E = 93:7$ .  $R_{\text{f}} = 0.5$  (petroleum

ether/AcOEt = 10:1).  $^1\text{H}$  NMR (500 MHz, Chloroform-d)  $\delta$  10.05 (d,  $J = 8.3$  Hz, 1H), 7.55 (dd,  $J = 7.7, 1.7$  Hz, 1H), 7.48 – 7.42 (m, 2H), 7.37 (ddd,  $J = 8.9, 7.5, 1.7$  Hz, 1H), 7.16 (td,  $J = 7.6, 1.1$  Hz, 1H),

6.94 (dd,  $J = 8.4, 1.1$  Hz, 1H), 6.91 – 6.84 (m, 2H), 6.78 (d,  $J = 10.8$  Hz, 1H), 6.26 (dd,  $J = 10.8, 8.3$  Hz, 1H).  $^{13}\text{C}$  NMR (126 MHz, Chloroform-d)  $\delta$  192.1, 157.5, 156.1, 137.5, 134.0, 132.8, 131.4, 128.4, 124.0, 120.0, 119.1, 116.1, 114.4, 96.7, 88.8. IR (KBr,  $\text{cm}^{-1}$ ) 3029, 1710, 1691, 1573, 1477, 1365, 1233, 1168, 1061, 953, 874, 761. HRMS (ESI) ( $[\text{M}+\text{H}]^+$ ) Calcd. for  $[\text{C}_{17}\text{H}_{12}\text{BrO}_2]^+$ : 327.0015, Found. 327.0016.

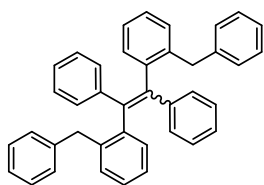

**1,2-bis(2-benzylphenyl)-1,2-diphenylethene (4i')** Yield: 87%,  $E/Z = 90:10$ .  $R_{\text{f}} = 0.7$

(petroleum ether).  $^1\text{H}$  NMR (500 MHz, Chloroform-d)  $\delta$  7.46 (dd,  $J = 5.4, 3.0$  Hz, 5H), 7.39 – 7.34 (m, 5H), 7.07 (dd,  $J = 8.0, 6.4$  Hz, 7H), 7.05 – 7.00 (m, 4H), 6.99 – 6.93 (m, 7H), 5.25 (s, 4H).  $^{13}\text{C}$  NMR (126 MHz, Chloroform-d)  $\delta$  145.8, 138.9, 128.6, 128.1, 127.6, 126.1, 124.1 54.9.

HRMS (ESI) ( $[\text{M}+\text{H}]^+$ ) Calcd. for  $[\text{C}_{40}\text{H}_{33}]^+$ : 437.2264, Found. 437.2274.

### 13. The racemization of product 4i at room temperature.

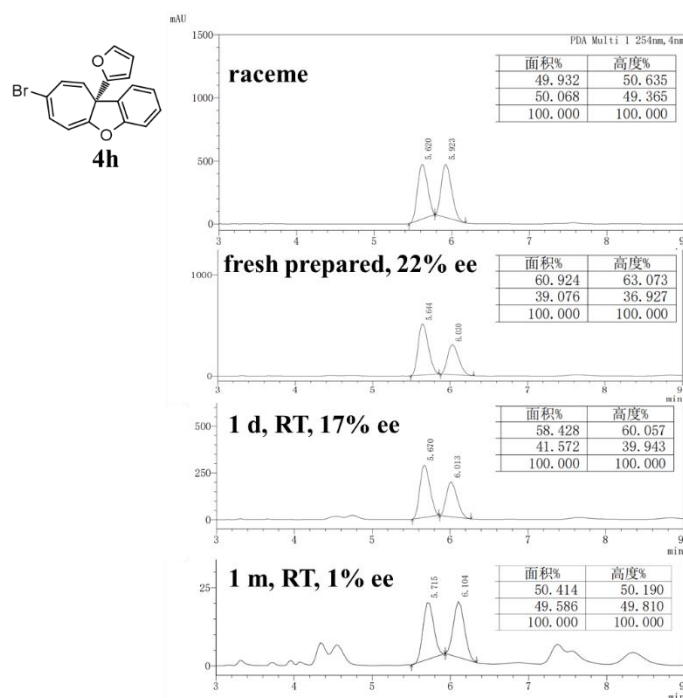

### 14. General procedure for aromatic substitution reaction.

Under nitrogen atmosphere, to a solution of enynones **5** (0.2 mmol) in dry DCM (0.1 M),  $\text{Rh}_2(\text{S-BTPCP})_4$  (0.01 eq, the catalyst was dissolved in DCM) were added. The reaction mixture was then stirred for 24 hours at room temperature. After the reaction was completed, the reaction mixture was filtered through short silica gel, and then the solvent was removed under reduced pressure. The crude aromatic substitution product was purified by flash column chromatography (silica gel, petroleum ether/AcOEt = 10:1) to yield **6a** – **6l**.

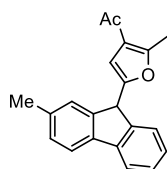

**1-(2-Methyl-5-(2-methyl-9H-fluoren-9-yl)furan-3-yl)ethanone (6a)** Yield: 95%, yellow oil,  $R_f = 0.3$

(petroleum ether/AcOEt = 10:1).  $^1\text{H NMR}$  (500 MHz,  $\text{CDCl}_3$ )  $\delta$  7.75 (d,  $J = 7.6$  Hz, 1H), 7.68 (d,  $J = 7.8$  Hz, 1H), 7.56 – 7.53 (m, 1H), 7.43 – 7.37 (m, 2H), 7.30 (td,  $J = 7.5, 1.1$  Hz, 1H), 7.24 (d,  $J = 7.9$  Hz, 1H), 6.23 (s, 1H), 5.10 (s, 1H), 2.58 (s, 3H), 2.43 (s, 3H), 2.32 (s, 3H).  $^{13}\text{C NMR}$  (126 MHz,  $\text{CDCl}_3$ )  $\delta$

193.2, 157.2, 151.1, 142.9, 142.5, 140.0, 137.2, 136.4, 127.7, 126.8, 125.9, 124.8, 124.1, 121.0, 118.9, 118.8, 105.3, 45.9, 28.1, 20.7, 13.5. IR (KBr,  $\text{cm}^{-1}$ ) 2976, 2931, 1716, 1561, 1448, 1373, 1232, 1134, 952, 863, 758. HRMS (ESI) ( $[\text{M}+\text{H}]^+$ ) Calcd. for  $[\text{C}_{21}\text{H}_{19}\text{O}_2]^+$ : 303.1380, Found. 303.1382. HPLC: OD-H column, 99:1 hexane:isopropanol, 1.00 mL/min,  $t_R =$  major: 11.9 min, minor: 15.3 min. 97% ee.  $[\alpha]_D^{24} -81.4^\circ$  (c 1.17,  $\text{CH}_2\text{Cl}_2$ ).

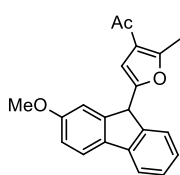

**1-(5-(2-Methoxy-9H-fluoren-9-yl)-2-methylfuran-3-yl)ethanone (6b)** Yield: 95%, yellow oil,  $R_f =$

0.3 (petroleum ether/AcOEt = 10:1).  $^1\text{H NMR}$  (400 MHz,  $\text{CDCl}_3$ )  $\delta$  7.60 (dd,  $J = 7.9, 3.0$  Hz, 2H), 7.44 (d,  $J = 7.5$  Hz, 1H), 7.30 (t,  $J = 7.5$  Hz, 1H), 7.20 – 7.13 (m, 1H), 7.07 – 7.00 (m, 1H), 6.88 (dd,  $J = 8.4, 2.3$  Hz, 1H), 6.15 (s, 1H), 5.00 (s, 1H), 3.77 (s, 3H), 2.49 (s, 3H), 2.22 (s, 3H).  $^{13}\text{C NMR}$  (101 MHz,  $\text{CDCl}_3$ )  $\delta$

194.2, 159.7, 158.3, 152.0, 145.5, 143.2, 140.9, 133.9, 128.0, 126.3, 125.1, 122.1, 120.9, 119.4, 113.8, 111.1,

106.4, 55.6, 47.1, 29.1, 14.5. IR (KBr,  $\text{cm}^{-1}$ ) 2973, 2932, 2888, 1711, 1672, 1564, 1463, 1376, 1305, 1160, 1130, 951, 817, 765. HRMS (ESI) ( $[\text{M}+\text{H}]^+$ ) Calcd. for  $[\text{C}_{21}\text{H}_{19}\text{O}_3]^+$ : 319.1329, Found. 319.1331. HPLC: OD-H column, 99:1 hexane:isopropanol, 1.00 mL/min,  $t_{\text{R}}$  = major: 20.9 min, minor: 22.9 min. 95% ee.  $[\alpha]_{\text{D}}^{24}$  -73.1° (c 0.67,  $\text{CH}_2\text{Cl}_2$ ).

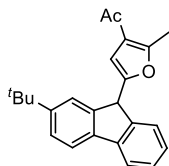

**1-(5-(2-(*tert*-Butyl)-9H-fluoren-9-yl)-2-methylfuran-3-yl)ethanone (6c)** Yield: 96%, yellow oil,  $R_{\text{f}}$  = 0.3 (petroleum ether/AcOEt = 10:1).  $^1\text{H}$  NMR (400 MHz,  $\text{CDCl}_3$ )  $\delta$  7.74 (d,  $J$  = 7.6 Hz, 1H), 7.70 (d,  $J$  = 8.0 Hz, 1H), 7.61 (s, 1H), 7.55 (d,  $J$  = 7.5 Hz, 1H), 7.46 (d,  $J$  = 8.0 Hz, 1H), 7.39 (t,  $J$  = 7.4 Hz, 1H), 7.29 (t,  $J$  = 7.5 Hz, 1H), 6.20 (s, 1H), 5.10 (s, 1H), 2.58 (s, 3H), 2.30 (s, 3H), 1.37 (s, 9H).  $^{13}\text{C}$  NMR (101 MHz,  $\text{CDCl}_3$ )  $\delta$  194.2, 158.2, 152.3, 150.9, 143.7, 143.6, 141.0, 138.3, 127.9, 126.9, 125.2, 125.1, 122.2, 122.1, 119.9, 119.7, 106.3, 47.1, 35.0, 31.6, 29.1, 14.5. IR (KBr,  $\text{cm}^{-1}$ ) 2974, 2889, 1709, 1561, 1465, 1375, 1305, 1159, 1130, 951, 818, 743. HRMS (ESI) ( $[\text{M}+\text{H}]^+$ ) Calcd. for  $[\text{C}_{24}\text{H}_{25}\text{O}_2]^+$ : 345.1849, Found. 345.1851. HPLC: OD-H column, 99:1 hexane:isopropanol, 1.00 mL/min,  $t_{\text{R}}$  = major: 7.46 min, minor: 6.95 min. 91% ee.  $[\alpha]_{\text{D}}^{24}$  -52.7° (c 0.33,  $\text{CH}_2\text{Cl}_2$ ).

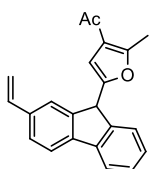

**1-(2-Methyl-5-(2-vinyl-9H-fluoren-9-yl)furan-3-yl)ethanone (6d)** Yield: 99%, yellow oil,  $R_{\text{f}}$  = 0.3 (petroleum ether/AcOEt = 10:1).  $^1\text{H}$  NMR (400 MHz,  $\text{CDCl}_3$ )  $\delta$  7.73 (dd,  $J$  = 14.5, 7.7 Hz, 2H), 7.59 (s, 1H), 7.54 (d,  $J$  = 7.5 Hz, 1H), 7.45 (d,  $J$  = 7.9 Hz, 1H), 7.40 (t,  $J$  = 7.4 Hz, 1H), 7.31 (t,  $J$  = 7.4 Hz, 1H), 6.77 (dd,  $J$  = 17.6, 10.9 Hz, 1H), 6.23 (s, 1H), 5.77 (d,  $J$  = 17.6 Hz, 1H), 5.25 (d,  $J$  = 10.9 Hz, 1H), 5.11 (s, 1H), 2.56 (s, 3H), 2.29 (s, 3H).  $^{13}\text{C}$  NMR (101 MHz,  $\text{CDCl}_3$ )  $\delta$  194.1, 158.3, 151.8, 144.1, 144.0, 140.7, 140.7, 137.1, 136.9, 128.0, 127.4, 126.4, 125.3, 122.9, 122.1, 120.2, 120.2, 113.8, 106.5, 47.0, 29.1, 14.5. IR (KBr,  $\text{cm}^{-1}$ ) 2973, 2933, 2887, 1708, 1571, 1465, 1417, 1377, 1306, 1160, 1130, 951, 817. HRMS (ESI) ( $[\text{M}+\text{Na}]^+$ ) Calcd. for  $[\text{C}_{22}\text{H}_{18}\text{NaO}_2]^+$ : 337.1199, Found. 337.1192. HPLC: OD-H column, 99:1 hexane:isopropanol, 1.00 mL/min,  $t_{\text{R}}$  = major: 12.6 min, minor: 13.4 min. 98% ee.  $[\alpha]_{\text{D}}^{24}$  -125.7° (c 1.5,  $\text{CH}_2\text{Cl}_2$ ).

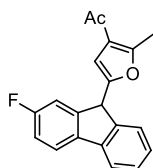

**1-(5-(2-Fluoro-9H-fluoren-9-yl)-2-methylfuran-3-yl)ethanone (6e)** Yield: 93%, yellow oil,  $R_{\text{f}}$  = 0.3 (petroleum ether/AcOEt = 10:1).  $^1\text{H}$  NMR (500 MHz,  $\text{CDCl}_3$ )  $\delta$  7.75 – 7.70 (m, 2H), 7.55 (d,  $J$  = 7.6 Hz, 1H), 7.42 (t,  $J$  = 7.5 Hz, 1H), 7.34 – 7.26 (m, 2H), 7.12 (td,  $J$  = 8.8, 2.5 Hz, 1H), 6.24 (s, 1H), 5.11 (s, 1H), 2.58 (s, 3H), 2.32 (s, 3H).  $^{19}\text{F}$  NMR (471 MHz,  $\text{CDCl}_3$ )  $\delta$  -114.2.  $^{13}\text{C}$  NMR (126 MHz,  $\text{CDCl}_3$ )  $\delta$  194.2, 162.6 (d,  $J$  = 246.0 Hz), 158.5, 151.2, 145.7 (d,  $J$  = 8.4 Hz), 143.4, 140.1, 136.9 (d,  $J$  = 2.4 Hz), 128.1, 127.1, 125.3, 122.1, 121.2 (d,  $J$  = 8.8 Hz), 119.9, 115.2 (d,  $J$  = 23.1 Hz), 112.7 (d,  $J$  = 23.4 Hz), 106.6, 47.0, 29.1, 14.5. IR (KBr,  $\text{cm}^{-1}$ ) 2973, 2934, 1710, 1571, 1466, 1374, 1307, 1164, 1092, 954, 853, 744. HRMS (ESI) ( $[\text{M}+\text{Na}]^+$ ) Calcd. for  $[\text{C}_{20}\text{H}_{15}\text{FNaO}_2]^+$ : 329.0948, Found. 329.0944. HPLC: OD-H column, 99:1 hexane:isopropanol, 1.00 mL/min,  $t_{\text{R}}$  = major: 13.2 min, minor: 10.3 min. 61% ee.  $[\alpha]_{\text{D}}^{24}$  -85.5° (c 1.5,  $\text{CH}_2\text{Cl}_2$ ).



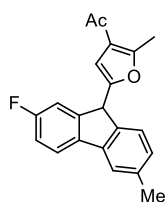

**1-(5-(2-Fluoro-6-methyl-9H-fluoren-9-yl)-2-methylfuran-3-yl)ethanone (6f)** Yield: 76%, yellow oil,

$R_f = 0.3$  (petroleum ether/AcOEt = 10:1).  $^1\text{H NMR}$  (400 MHz,  $\text{CDCl}_3$ )  $\delta$  7.67 (dd,  $J = 8.4, 5.0$  Hz, 1H),

7.53 (s, 1H), 7.42 (d,  $J = 7.7$  Hz, 1H), 7.24 (s, 1H), 7.15 – 7.05 (m, 2H), 6.22 (s, 1H), 5.05 (s, 1H), 2.56

(s, 3H), 2.44 (s, 3H), 2.31 (s, 3H).  $^{19}\text{F NMR}$  (471 MHz,  $\text{CDCl}_3$ )  $\delta$  -114.4.  $^{13}\text{C NMR}$  (101 MHz,  $\text{CDCl}_3$ )

$\delta$  194.1, 162.5 (d,  $J = 245.5$  Hz), 158.4, 151.6, 146.1 (d,  $J = 8.3$  Hz), 140.6 (d,  $J = 2.0$  Hz), 140.3, 138.0, 136.9 (d,  $J = 2.5$

Hz), 128.0, 124.9, 122.1, 121.0 (d,  $J = 8.9$  Hz), 120.5, 115.1 (d,  $J = 22.9$  Hz), 112.7 (d,  $J = 23.3$  Hz), 106.5, 46.7, 29.1, 21.6,

14.5. IR (KBr,  $\text{cm}^{-1}$ ) 2971, 2930, 2885, 1711, 1565, 1449, 1372, 1310, 1233, 1137, 957, 849, 741. HRMS (ESI) ( $[\text{M}+\text{Na}]^+$ )

Calcd. for  $[\text{C}_{21}\text{H}_{17}\text{FNaO}_2]^+$ : 343.1105, Found. 343.1100. HPLC: OD-H column, 99:1 hexane:isopropanol, 1.00 mL/min,  $t_R$

= major: 11.6 min, minor: 9.6 min. 87% ee.  $[\alpha]_D^{24}$  -88.0° (c 1.17,  $\text{CH}_2\text{Cl}_2$ ).

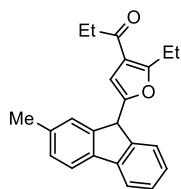

**1-(2-Ethyl-5-(2-methyl-9H-fluoren-9-yl)furan-3-yl)propan-1-one (6g)** Yield: 99%, yellow oil,  $R_f =$

0.3 (petroleum ether/AcOEt = 10:1).  $^1\text{H NMR}$  (400 MHz,  $\text{CDCl}_3$ )  $\delta$  7.61 (d,  $J = 7.5$  Hz, 1H), 7.54 (d,  $J$

= 7.7 Hz, 1H), 7.46 (d,  $J = 7.5$  Hz, 1H), 7.32 – 7.24 (m, 2H), 7.18 (t,  $J = 7.4$  Hz, 1H), 7.10 (d,  $J = 7.4$

Hz, 1H), 6.03 (s, 1H), 4.99 (s, 1H), 2.94 (q,  $J = 7.5$  Hz, 2H), 2.49 (q,  $J = 7.3$  Hz, 2H), 2.31 (s, 3H), 1.17

(t,  $J = 7.5$  Hz, 3H), 0.97 (t,  $J = 7.3$  Hz, 3H).  $^{13}\text{C NMR}$  (101 MHz,  $\text{CDCl}_3$ )  $\delta$  197.1, 163.0, 152.2, 144.0, 143.6, 141.1, 138.3,

137.4, 128.8, 127.9, 126.9, 126.0, 125.3, 120.6, 119.9, 119.9, 105.5, 47.0, 34.4, 21.8, 21.7, 12.1, 7.8. IR (KBr,  $\text{cm}^{-1}$ ) 2975,

2890, 1712, 1557, 1459, 1373, 1247, 1157, 1132, 952, 821, 766. HRMS (ESI) ( $[\text{M}+\text{H}]^+$ ) Calcd. for  $[\text{C}_{23}\text{H}_{23}\text{O}_2]^+$ : 331.1693,

Found. 331.1696. HPLC: OD-H column, 99:1 hexane:isopropanol, 1.00 mL/min,  $t_R$  = major: 7.2 min, minor: 8.2 min. 98%

ee.  $[\alpha]_D^{24}$  -102.1° (c 0.67,  $\text{CH}_2\text{Cl}_2$ ).

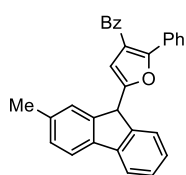

**(5-(2-Methyl-9H-fluoren-9-yl)-2-phenylfuran-3-yl)(phenyl)methanone (6h)** Yield: 95%, yellow oil,

$R_f = 0.3$  (petroleum ether/AcOEt = 10:1).  $^1\text{H NMR}$  (500 MHz,  $\text{CDCl}_3$ )  $\delta$  7.80 – 7.73 (m, 3H), 7.70 –

7.65 (m, 4H), 7.49 (s, 1H), 7.46 – 7.38 (m, 2H), 7.34 – 7.26 (m, 6H), 7.23 (t,  $J = 3.9$  Hz, 1H), 6.28 (s,

1H), 5.24 (s, 1H), 2.43 (s, 3H).  $^{13}\text{C NMR}$  (101 MHz,  $\text{CDCl}_3$ )  $\delta$  191.9, 155.6, 153.5, 143.6, 143.3, 141.2,

138.5, 138.0, 137.5, 132.8, 130.0, 129.8, 128.9, 128.9, 128.4, 128.3, 128.0, 127.5, 127.0, 126.1, 125.4, 121.7, 120.0, 119.9,

109.6, 47.1, 21.8. IR (KBr,  $\text{cm}^{-1}$ ) 2974, 2888, 1711, 1560, 1466, 1375, 1306, 1160, 1130, 951, 818, 693. HRMS (ESI)

( $[\text{M}+\text{H}]^+$ ) Calcd. for  $[\text{C}_{31}\text{H}_{23}\text{O}_2]^+$ : 427.1693, Found. 427.1694. HPLC: OD-H column, 99:1 hexane:isopropanol, 1.00

mL/min,  $t_R$  = major: 14.3 min, minor: 18.2 min. 98% ee.  $[\alpha]_D^{24}$  -146.7° (c 1.17,  $\text{CH}_2\text{Cl}_2$ ).

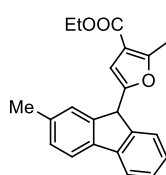

**Ethyl 2-methyl-5-(2-methyl-9H-fluoren-9-yl)furan-3-carboxylate (6i)** Yield: 97%, yellow oil,  $R_f =$

0.3 (petroleum ether/AcOEt = 10:1).  $^1\text{H NMR}$  (400 MHz,  $\text{CDCl}_3$ )  $\delta$  7.72 (d,  $J = 7.5$  Hz, 1H), 7.64 (d,  $J$

= 7.7 Hz, 1H), 7.52 (d,  $J = 7.5$  Hz, 1H), 7.40 – 7.33 (m, 2H), 7.27 (t,  $J = 7.4$  Hz, 1H), 7.23 – 7.17 (m,

1H), 6.29 (s, 1H), 5.06 (s, 1H), 4.22 (q, J = 7.1 Hz, 2H), 2.54 (s, 3H), 2.40 (s, 3H), 1.28 (t, J = 7.1 Hz, 3H). <sup>13</sup>C NMR (101 MHz, CDCl<sub>3</sub>) δ 164.2, 159.0, 152.1, 144.0, 143.7, 141.1, 138.3, 137.3, 128.7, 127.8, 126.9, 125.9, 125.2, 119.9, 119.8, 114.1, 106.7, 60.0, 47.0, 21.7, 14.4, 13.9. IR (KBr, cm<sup>-1</sup>) 2975, 2889, 1711, 1563, 1465, 1375, 1248, 1158, 1131, 1078, 951, 820. HRMS (ESI) ([M+H]<sup>+</sup>) Calcd. for [C<sub>22</sub>H<sub>21</sub>O<sub>3</sub>]<sup>+</sup>: 333.1485, Found. 333.1490. HPLC: OD-H column, 99:1 hexane:isopropanol, 1.00 mL/min, t<sub>R</sub> = major: 7.4 min, minor: 9.2 min. 97% ee. [α]<sub>D</sub><sup>24</sup> -94.4° (c 0.5, CH<sub>2</sub>Cl<sub>2</sub>).

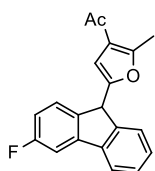

**1-(5-(3-Fluoro-9H-fluoren-9-yl)-2-methylfuran-3-yl)ethanone (6j)** Yield: 91%, yellow oil, R<sub>f</sub> = 0.3 (petroleum ether/AcOEt = 10:1). <sup>1</sup>H NMR (400 MHz, CDCl<sub>3</sub>) δ 7.74 (d, J = 7.6 Hz, 1H), 7.57 (d, J = 7.5 Hz, 1H), 7.51 (dd, J = 8.4, 5.1 Hz, 1H), 7.46 – 7.40 (m, 2H), 7.36 (t, J = 7.4 Hz, 1H), 7.02 (td, J = 8.7, 2.3 Hz, 1H), 6.21 (s, 1H), 5.09 (s, 1H), 2.57 (s, 3H), 2.30 (s, 4H). <sup>19</sup>F NMR (376 MHz, CDCl<sub>3</sub>) δ -114.5. <sup>13</sup>C NMR (101 MHz, CDCl<sub>3</sub>) δ 194.0, 163.2 (d, J = 244.9 Hz), 158.3, 151.6, 144.5, 143.0 (d, J = 9.0 Hz), 140.1, 139.0, 128.1 (d, J = 5.4 Hz), 126.3 (d, J = 9.0 Hz), 125.4, 122.1, 120.4, 114.3 (d, J = 23.1 Hz), 107.3 (d, J = 23.3 Hz), 106.4, 46.5, 29.1, 14.5. IR (KBr, cm<sup>-1</sup>) 2975, 2931, 1751, 1698, 1595, 1465, 1362, 1200, 1162, 1089, 949, 818, 766. HRMS (ESI) ([M+H]<sup>+</sup>) Calcd. for [C<sub>20</sub>H<sub>16</sub>FO<sub>2</sub>]<sup>+</sup>: 307.1129, Found. 307.1133. HPLC: OD-H column, 99:1 hexane:isopropanol, 1.00 mL/min, t<sub>R</sub> = major: 13.6 min, minor: 15.3 min. 95% ee. [α]<sub>D</sub><sup>24</sup> -102.2° (c 1.17, CH<sub>2</sub>Cl<sub>2</sub>).

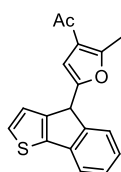

**1-(5-(4H-indeno[1,2-b]thiophen-4-yl)-2-methylfuran-3-yl)ethanone (6k)** Yield: 99%, yellow oil, R<sub>f</sub> = 0.25 (petroleum ether/AcOEt = 10:1). <sup>1</sup>H NMR (400 MHz, CDCl<sub>3</sub>) δ 7.55 (d, J = 7.5 Hz, 1H), 7.47 (d, J = 7.5 Hz, 1H), 7.37 – 7.31 (m, 2H), 7.25 – 7.19 (m, 1H), 7.15 (d, J = 4.9 Hz, 1H), 6.19 (s, 1H), 4.94 (s, 1H), 2.57 (s, 3H), 2.30 (s, 3H). <sup>13</sup>C NMR (101 MHz, CDCl<sub>3</sub>) δ 194.2, 158.3, 150.9, 147.4, 146.5, 143.4, 137.9, 128.0, 127.95, 125.6, 125.3, 122.6, 122.1, 119.2, 106.1, 44.4, 29.1, 14.5. IR (KBr, cm<sup>-1</sup>) 3027, 2924, 1710, 1666, 1574, 1476, 1423, 1370, 1243, 1175, 1023, 953, 851, 762. HRMS (ESI) ([M+H]<sup>+</sup>) Calcd. for [C<sub>18</sub>H<sub>15</sub>O<sub>2</sub>S]<sup>+</sup>: 295.0787, Found. 295.0785. HPLC: OD-H column, 95:5 hexane:isopropanol, 1.00 mL/min, t<sub>R</sub> = major: 8.8 min, minor: 12.5 min. 96% ee. [α]<sub>D</sub><sup>24</sup> -118.2° (c 1.17, CH<sub>2</sub>Cl<sub>2</sub>).

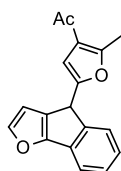

**1-(5-(4H-indeno[1,2-b]furan-4-yl)-2-methylfuran-3-yl)ethanone (6l)** Yield: 99%, yellow oil, R<sub>f</sub> = 0.3 (petroleum ether/AcOEt = 10:1). <sup>1</sup>H NMR (400 MHz, CDCl<sub>3</sub>) δ 7.48 (d, J = 7.9 Hz, 2H), 7.40 (d, J = 7.5 Hz, 1H), 7.26 (t, J = 7.5 Hz, 1H), 7.12 (t, J = 7.5 Hz, 1H), 6.55 (s, 1H), 6.15 (s, 1H), 4.69 (s, 1H), 2.50 (s, 3H), 2.23 (s, 3H). <sup>13</sup>C NMR (101 MHz, CDCl<sub>3</sub>) δ 194.1, 159.4, 158.2, 150.7, 147.1, 146.3, 132.5, 128.6, 127.8, 125.6, 125.3, 122.0, 116.9, 108.6, 106.0, 40.2, 29.1, 14.5. IR (KBr, cm<sup>-1</sup>) 3029, 2928, 1710, 1665, 1572, 1426, 1373, 1243, 1175, 1008, 956, 856, 761. HRMS (ESI) ([M+H]<sup>+</sup>) Calcd. for [C<sub>18</sub>H<sub>15</sub>O<sub>3</sub>]<sup>+</sup>: 279.1016, Found. 279.1019. HPLC: OD-H column, 99:1 hexane:isopropanol, 1.00 mL/min, t<sub>R</sub> = major: 11.9 min, minor: 19.8 min. 99% ee. [α]<sub>D</sub><sup>24</sup> -124.6° (c 1.17,

$\text{CH}_2\text{Cl}_2$ ).

### 15. [4+2] cycloaddition of cycloheptatriene 4 with PTAD.

To a solution of **4** (0.10 mmol, 1.0 equiv.) in ethyl acetate (1.0 mL) was added the PTAD (0.105 mmol, 18.4mg). The reaction mixture was stirred at room temperature and monitored by TLC. After the reaction was completed, the solvent was removed in vacuo and the crude product was directly purified by flash chromatography.

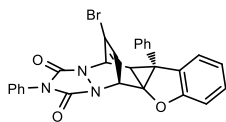

**(5bR)-14-Bromo-2,5b-diphenyl-5a,5b-dihydro-1H,5H,11H-5,11-**

**ethenobenzofuro[2',3':1,3]cyclopropa[1,2-d][1,2,4]triazolo[1,2-a]pyridazine-1,3(2H)-dione**

**(10a)** Yield: 68%, > 95:5 dr, white solid,  $R_f = 0.45$  (petroleum ether/AcOEt = 5:1).  $^1\text{H}$  NMR (500

MHz, Chloroform- $d$ )  $\delta$  7.49 – 7.44 (m, 6H), 7.42 – 7.37 (m, 1H), 7.33 (q,  $J = 3.1$  Hz, 2H), 7.24 (t,  $J = 7.7$  Hz, 1H), 6.96 – 6.89 (m, 2H), 6.83 (d,  $J = 7.6$  Hz, 1H), 6.14 (dd,  $J = 6.7, 2.3$  Hz, 1H), 5.77 (d,  $J = 6.7$  Hz, 1H), 5.59 (dd,  $J = 4.8, 2.4$  Hz, 1H), 1.52 (d,  $J = 4.8$  Hz, 1H).  $^{13}\text{C}$  NMR (126 MHz, Chloroform- $d$ )  $\delta$  156.8, 156.3, 156.2, 134.2, 132.9, 131.0, 130.7, 129.6, 129.2, 129.2, 129.1, 128.6, 128.6, 127.7, 127.1, 125.5, 124.7, 121.8, 117.7, 111.1, 72.8, 62.3, 57.8, 46.4, 20.6. HRMS (ESI) ( $[\text{M}+\text{Na}]^+$ ) Calcd. for  $[\text{C}_{27}\text{H}_{18}\text{BrN}_3\text{O}_3]^+$ : 534.0424, Found. 534.0424. HPLC: OD-H column, 90:10 hexane:isopropanol, 1.00 mL/min,  $t_R =$  major: 26.2 min, minor: 30.965 min. 99% ee.

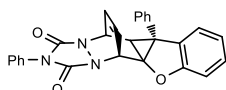

**(5bR)-2,5b-Diphenyl-5a,5b-dihydro-1H,5H,11H-5,11-**

**ethenobenzofuro[2',3':1,3]cyclopropa[1,2-d][1,2,4]triazolo[1,2-a]pyridazine-1,3(2H)-**

**dione (10b)** Yield: 36%, > 95:5 dr, red oil,  $R_f = 0.45$  (petroleum ether/AcOEt = 5:1).  $^1\text{H}$  NMR (500 MHz, Chloroform- $d$ )  $\delta$  7.50 – 7.36 (m, 6H), 7.31 (dd,  $J = 6.1, 2.9$  Hz, 2H), 7.26 – 7.21 (m, 2H), 7.06 (d,  $J = 8.1$  Hz, 1H), 6.96 (dt,  $J = 6.5, 2.0$  Hz, 1H), 6.91 (td,  $J = 7.5, 1.0$  Hz, 1H), 6.80 (dd,  $J = 7.6, 1.3$  Hz, 1H), 5.88 (ddd,  $J = 8.0, 6.1, 1.8$  Hz, 1H), 5.73 (dd,  $J = 6.3, 1.4$  Hz, 1H), 5.67 (ddd,  $J = 7.6, 5.7, 1.5$  Hz, 1H), 5.56 (ddd,  $J = 5.9, 4.6, 1.8$  Hz, 1H), 1.49 (d,  $J = 4.6$  Hz, 1H).  $^{13}\text{C}$  NMR (126 MHz, Chloroform- $d$ )  $\delta$  156.7, 156.6, 156.2, 135.6, 133.4, 131.2, 130.8, 129.4, 129.2, 128.9, 128.8, 128.4, 127.9, 127.6, 125.6, 125.3, 124.7, 121.6, 111.1, 73.4, 55.9, 53.9, 46.1, 19.8. HRMS (ESI) ( $[\text{M}+\text{H}]^+$ ) Calcd. for  $[\text{C}_{27}\text{H}_{20}\text{N}_3\text{O}_3]^+$ : 434.1499, Found. 434.1499. HPLC: MD(2) column, 80:20 hexane:isopropanol, 0.50 mL/min,  $t_R =$  major: 36.6 min, minor: 41.9 min. 99% ee.

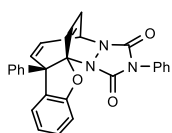

**(7aR)-2,7a-diphenyl-5,7a-dihydro-1H-5,12a-ethenobenzofuro[2,3-c][1,2,4]triazolo[1,2-**

**a][1,2]diazepine-1,3(2H)-dione (11a)** Yield: 57%, > 95:5 dr, white solid,  $R_f = 0.25$  (petroleum

ether/AcOEt = 5:1).  $^1\text{H}$  NMR (500 MHz, Chloroform- $d$ )  $\delta$  7.46 – 7.39 (m, 5H), 7.38 – 7.32 (m, 2H), 7.27 – 7.22 (m, 3H), 7.21 – 7.14 (m, 2H), 7.07 – 6.99 (m, 2H), 6.62 (dd,  $J = 9.4, 6.9$  Hz, 1H), 6.50 (dd,  $J = 10.8, 7.8$  Hz, 1H), 6.42 (d,  $J = 10.8$  Hz, 1H), 6.03 (d,  $J = 9.4$  Hz, 1H), 5.35 (t,  $J = 7.3$  Hz, 1H).  $^{13}\text{C}$  NMR (126 MHz, Chloroform- $d$ )  $\delta$  159.7, 150.3, 149.9, 136.1, 133.4, 131.4, 130.4, 130.1, 129.8, 129.5, 129.3, 129.0, 128.2, 128.0, 126.1, 123.9, 123.5, 123.4, 113.0, 104.8, 64.4, 47.8. HRMS (ESI) ( $[\text{M}+\text{H}]^+$ ) Calcd. for  $[\text{C}_{27}\text{H}_{20}\text{N}_3\text{O}_3]^+$ : 434.1499, Found. 434.1495. HPLC: MD(2) column, 80:20 hexane:isopropanol, 0.50 mL/min,  $t_R =$  major: 45.7 min, minor: 58.6 min. > 99% ee.

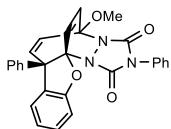

**(7aR)-5-Methoxy-2,7a-diphenyl-5,7a-dihydro-1H-5,12a-ethenobenzofuro[2,3-c][1,2,4]triazolo[1,2-a][1,2]diazepine-1,3(2H)-dione (11b)** Yield: 49%, > 95:5 dr, white solid,  $R_f =$

0.25 (petroleum ether/AcOEt = 4:1).  $^1\text{H NMR}$  (500 MHz, Chloroform-d)  $\delta$  7.45 (t,  $J = 7.8$  Hz, 2H), 7.38 (dd,  $J = 8.0, 6.0$  Hz, 3H), 7.31 – 7.20 (m, 7H), 7.13 (d,  $J = 8.1$  Hz, 1H), 7.02 (t,  $J = 7.5$  Hz, 1H), 6.70 (d,  $J = 11.8$  Hz, 1H), 5.76 (dd,  $J = 11.9, 2.0$  Hz, 1H), 5.66 (d,  $J = 7.3$  Hz, 1H), 5.33 (dd,  $J = 7.5, 1.9$  Hz, 1H), 3.46 (s, 3H).  $^{13}\text{C NMR}$  (126 MHz, Chloroform-d)  $\delta$  157.4, 156.3, 155.8, 150.2, 138.0, 132.7, 131.3, 129.8, 129.2, 128.98, 128.97, 128.5, 128.1, 127.5, 126.3, 125.7, 123.6, 123.5, 112.8, 101.3, 95.0, 64.8, 60.2, 55.0. HRMS (ESI) ( $[\text{M}+\text{H}]^+$ ) Calcd. for  $[\text{C}_{28}\text{H}_{22}\text{N}_3\text{O}_4]^+$ : 464.1605, Found. 464.1598. HPLC: MD(2) column, 80:20 hexane:isopropanol, 0.50 mL/min,  $t_R =$  major: 25.3 min, minor: 24.7 min. > 99% ee.

#### 16. Hydrogenation of cycloheptatriene 4c.

A suspension of Pd/C 10% (10 mg) and **4c** (25.8 mg, 0.1 mmol) in ethyl acetate (3.0 mL) was stirred at room temperature under 1 atm hydrogen atmosphere. After being stirred 3 hours, the mixture was filtrated through a pad of Celite and the filtration was concentrated in vacuo, the residue was purified by column chromatography on silica gel to afford the desired the product **12** in 94% yield (24.6 mg, 98% ee).

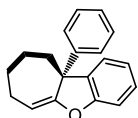

**(R)-10a-phenyl-8,9,10,10a-tetrahydro-7H-cyclohepta[b]benzofuran (12)** Yield: 94%, white solid,

$R_f = 0.7$  (petroleum ether).  $^1\text{H NMR}$  (500 MHz, Chloroform-d)  $\delta$  7.64 – 7.55 (m, 2H), 7.38 (t,  $J = 7.8$  Hz, 2H), 7.26 – 7.21 (m, 1H), 7.19 (dd,  $J = 7.5, 1.4$  Hz, 1H), 7.11 (td,  $J = 7.8, 1.4$  Hz, 1H), 6.92 – 6.81 (m, 2H), 5.82 (dd,  $J = 9.3, 4.8$  Hz, 1H), 2.80 (ddd,  $J = 14.1, 5.3, 2.3$  Hz, 1H), 2.14 – 1.90 (m, 4H), 1.71 (dddt,  $J = 18.7, 10.7, 5.3, 2.8$  Hz, 2H), 1.54 – 1.43 (m, 1H).  $^{13}\text{C NMR}$  (126 MHz, Chloroform-d)  $\delta$  163.8, 155.9, 141.7, 135.8, 129.0, 128.1, 126.4, 126.2, 123.1, 121.6, 109.3, 104.0, 56.2, 36.6, 28.0, 27.3, 23.9. HRMS (ESI) ( $[\text{M}+\text{Na}]^+$ ) Calcd. for  $[\text{C}_{19}\text{H}_{18}\text{NaO}]^+$ : 285.1250, Found. 285.1251. HPLC: MD(2) column, 99.2:0.8 hexane:isopropanol, 0.40 mL/min,  $t_R =$  major: 11.6 min, minor: 11.4 min. 98% ee.

## 17. Computational details

All of the calculations were performed with Gaussian 16 program.<sup>7</sup> The hybrid B3LYP functional in conjunction with the def2SVP basis sets,<sup>8-9</sup> was applied for the optimization of all stationary points in gas phase. Empirical dispersion was included using the D3 version of Grimme's dispersion with Becke-Johnson damping.<sup>10</sup> Frequency calculations were performed at the same level to confirm whether each stationary point was either a minimum or a transition structure. All the thermochemistry data were obtained at 253.15 K. Single point energy calculations were carried out with Truhlar's M06 functional with def2TZVP basis set for all atoms in dichloroethane with SMD solvent model.<sup>11-12</sup>  $\text{Rh}_2(\text{OAc})_4$  was used as the catalyst model during the investigation of reaction mechanism to reduce the computation cost. For each stationary point, the free energy corrections were calculated using Grimme's quasiharmonic approximation with GoodVibes.<sup>13</sup> Computed structures were illustrated using CYLView.<sup>14</sup>

1. DFT studies on Rh<sub>2</sub>(II)-catalyzed Büchner reaction of enynes.

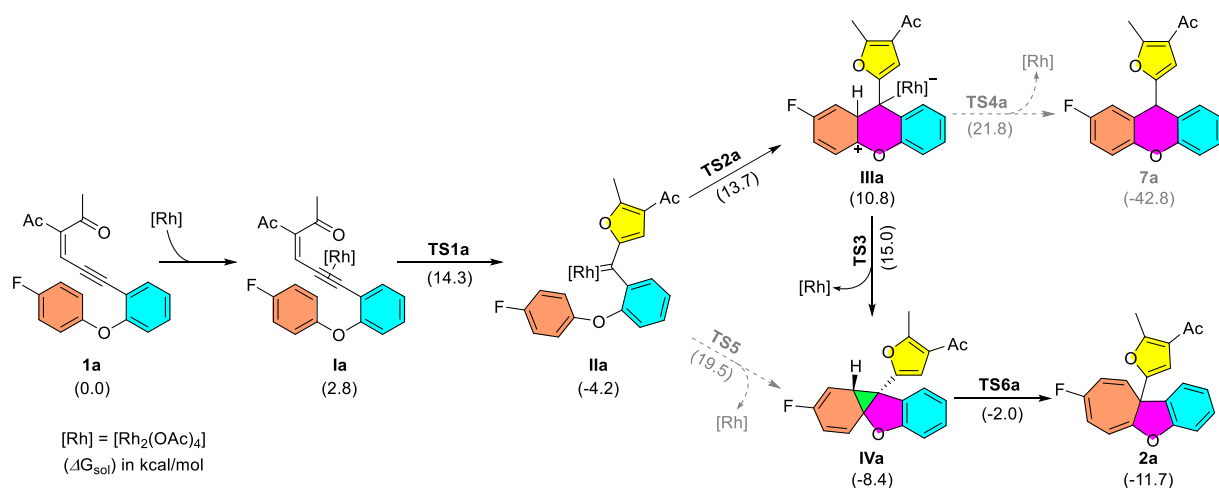

**Scheme S1.** Plausible reaction pathways of Rh<sub>2</sub>(II)-catalyzed Büchner reaction of enynone **1a**. If not otherwise noted, relative Gibbs free energies computed at 253.15 K with M06/def2TZVP-SMD(dichloroethane)//B3LYP-D3(BJ)/def2SVP theoretical level are reported in kcal/mol.

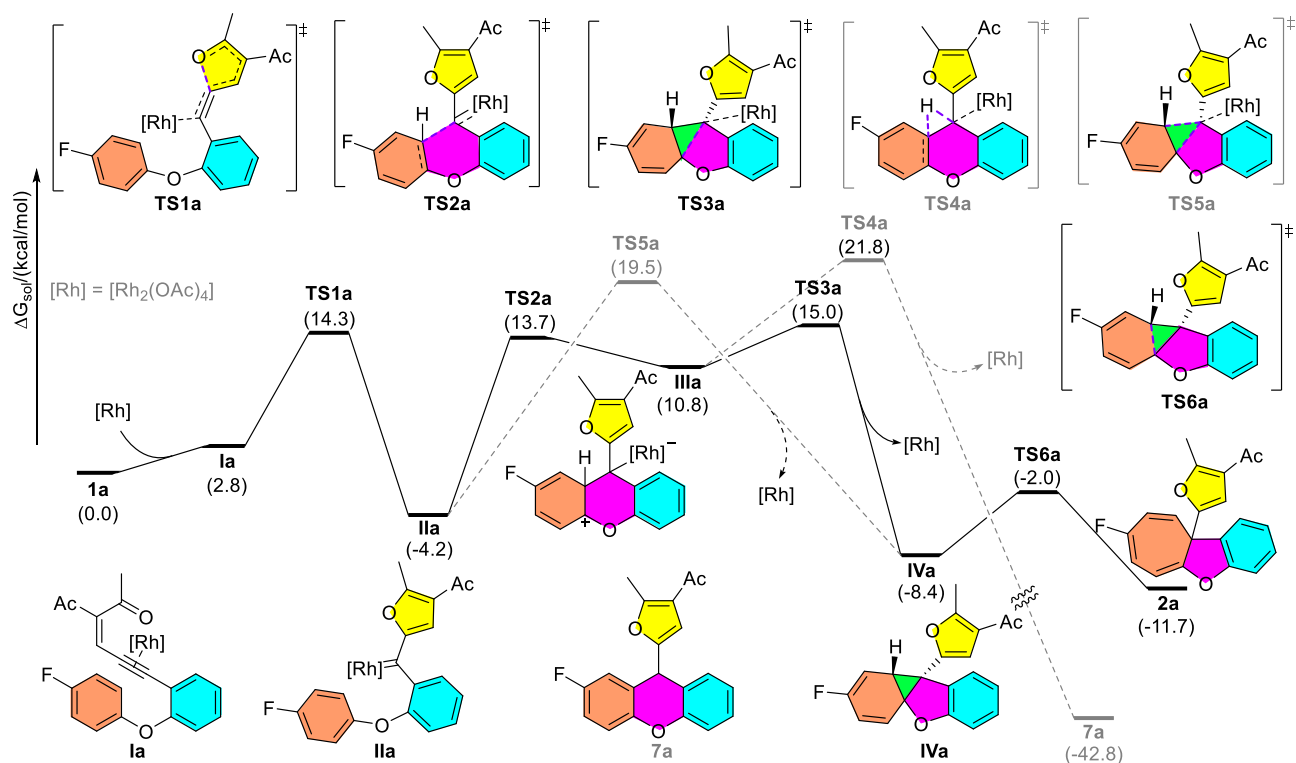

**Scheme S2.** Free energy profiles of Rh<sub>2</sub>(II)-catalyzed Büchner reaction pathways of enynone **1a**.

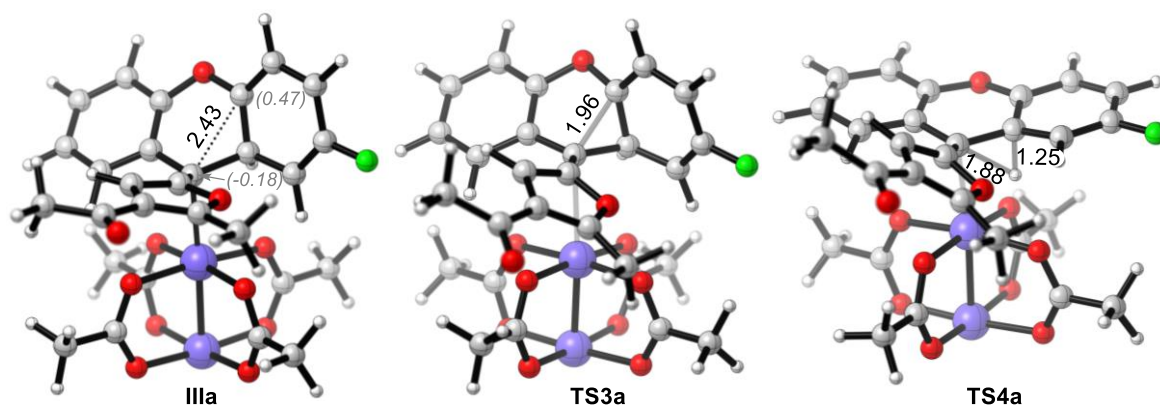

**Figure S1. Optimized structures of important stationary points. NBO charge is present in brackets. And distance is given at angstrom.**

Based on our experimental observations and DFT calculations, the plausible reaction mechanism was proposed. The reaction starts with the coordination of rhodium catalyst with alkyne moiety, followed by a 5-*exo-dig* cyclization to afford rhodium carbene intermediate **IIa**. Then, electrophilic addition of carbene to phenyl ring leads to the formation of intermediate **IIIa**. Due to the breaking of aromatic system, intermediate **IIIa** is highly unstable, and the free energy increased by 15.0 kcal/mol related to carbene **IIa**. From intermediate **IIIa**, there is a competition between ring closure and [1,2]-H shift. The ring-closure step is favored with a low free energy barrier of 4.2 kcal/mol, which could be possibly contributed to the close distance and attractive electrostatic interaction between two carbons of the forming bond in intermediate **IIIa**. Moreover, there is a smaller distortion energy penalty to overcome during the ring-closure step, as the structure of **TS3a** is closer to that of intermediate **IIIa** than the [1,2]-H shift transition state structure of **TS4a**. Moreover, a concerted cyclopropanation step *via* **TS5a** was also considered, but the free energy barrier, 23.7 kcal/mol is higher than the ring-closure step by 4.5 kcal/mol.

## 2. DFT studies on Rh<sub>2</sub>(II)-catalyzed aromatic substitution reaction of enynes.

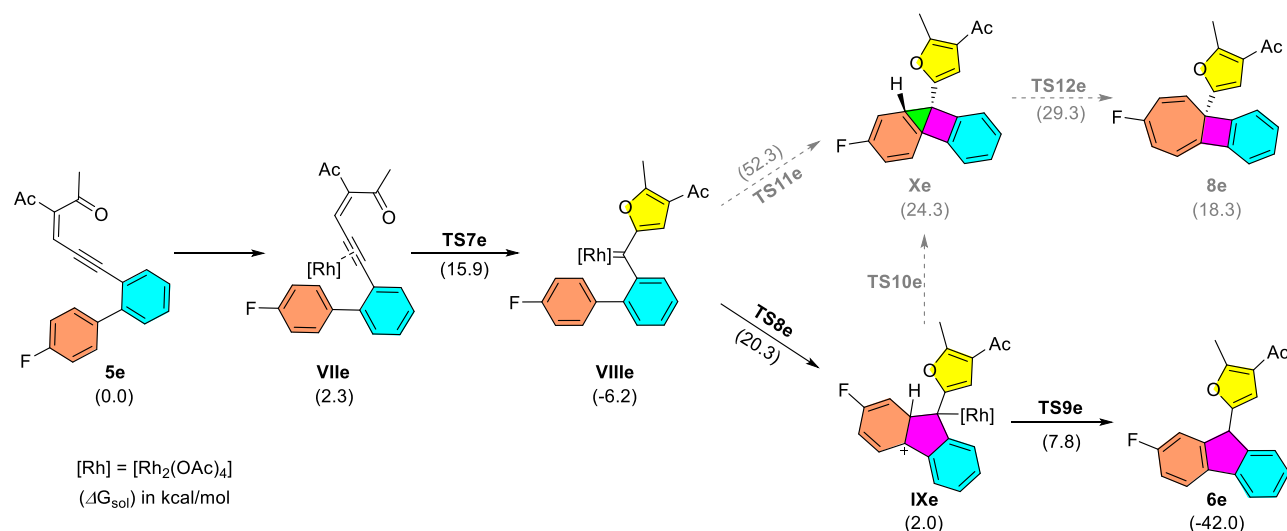



**Scheme S3. Plausible reaction pathways of Rh<sub>2</sub>(II)-catalyzed aromatic substitution reaction of enyne 5e. After extensive optimization, we ultimately found that TS10e could not be located.**

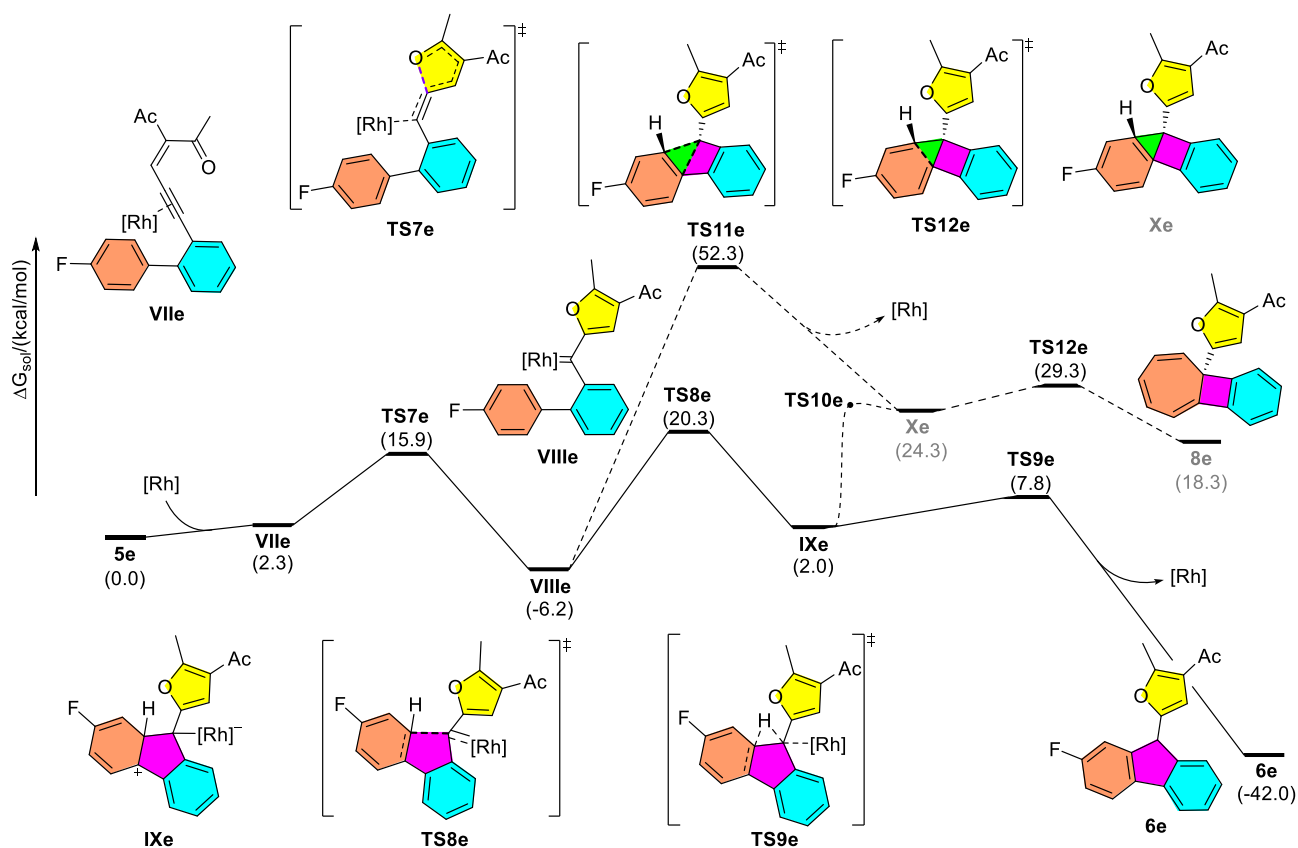

**Scheme S4. Free energy profiles of Rh<sub>2</sub>(II)-catalyzed aromatic substitution reaction of enyne 5e.**

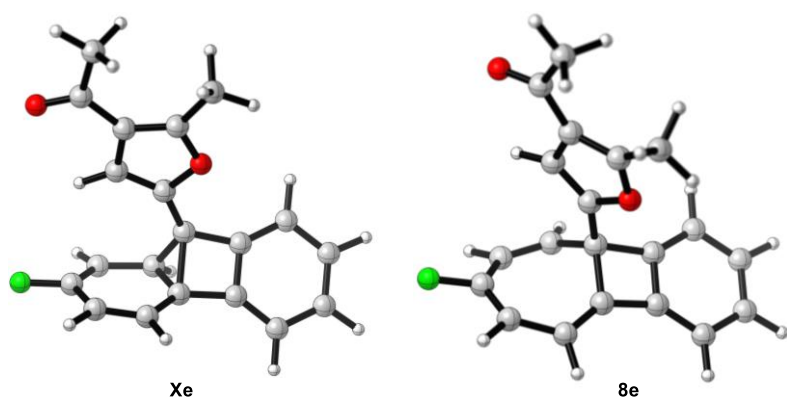

**Figure S1. Optimized structures of selected stationary points.**

For Rh(II)-catalyzed transformation of enyne 5e, the possible Büchner reaction is impossible, as the corresponding product 8e is even higher in free energy than reactant 5e by 18.3 kcal/mol. This could be contributed to the high ring strain

of the fused cyclobutene in structures **Xe** and **8e**. However, the aromatic substitution process *via* **TS9e** is more favorable due the release of this high ring strain.

### 3 Tables of energies and other thermodynamic parameters.

**Table S1**

| <b>Index</b>            | $E_{\text{ele}}$ | $E_{\text{ele}}(\text{SP})$ | ZPE     | H           | G(T)        | qh-G(T)     |
|-------------------------|------------------|-----------------------------|---------|-------------|-------------|-------------|
| <b>1a</b>               | -1095.87583      | -1096.29686                 | 0.29546 | -1095.56312 | -1095.62384 | -1095.61806 |
| <b>[Rh<sub>2</sub>]</b> | -1134.67797      | -1135.13924                 | 0.21028 | -1134.45046 | -1134.50769 | -1134.50398 |
| <b>Ia</b>               | -2230.60765      | -2231.45456                 | 0.50765 | -2230.06551 | -2230.16119 | -2230.15298 |
| <b>TS1a</b>             | -2230.58192      | -2231.43429                 | 0.50617 | -2230.04159 | -2230.13881 | -2230.12920 |
| <b>IIa</b>              | -2230.61504      | -2231.46800                 | 0.50965 | -2230.07166 | -2230.16703 | -2230.15812 |
| <b>TS2a</b>             | -2230.59493      | -2231.43922                 | 0.50844 | -2230.05323 | -2230.14605 | -2230.13822 |
| <b>IIIa</b>             | -2230.59969      | -2231.44415                 | 0.50904 | -2230.05716 | -2230.15048 | -2230.14261 |
| <b>TS3a</b>             | -2230.59295      | -2231.43823                 | 0.50924 | -2230.05065 | -2230.14283 | -2230.13514 |
| <b>IVa</b>              | -1095.89761      | -1096.31675                 | 0.29878 | -1095.58337 | -1095.63580 | -1095.63327 |
| <b>TS4a</b>             | -2230.57899      | -2231.42253                 | 0.50437 | -2230.04139 | -2230.13368 | -2230.12613 |
| <b>TS5a</b>             | -2230.58567      | -2231.43022                 | 0.50788 | -2230.04470 | -2230.13590 | -2230.12878 |
| <b>TS6a</b>             | -1095.88968      | -1096.30560                 | 0.29751 | -1095.57693 | -1095.62860 | -1095.62633 |
| <b>2a</b>               | -1095.91075      | -1096.32204                 | 0.29880 | -1095.59631 | -1095.64882 | -1095.64642 |
| <b>7a</b>               | -1095.96323      | -1096.37285                 | 0.30033 | -1095.64739 | -1095.70046 | -1095.69763 |

**Table S2**

| <b>Index</b> | $E_{\text{ele}}$ | $E_{\text{ele}}(\text{SP})$ | ZPE     | H           | G(T)        | qh-G(T)     |
|--------------|------------------|-----------------------------|---------|-------------|-------------|-------------|
| <b>5e</b>    | -1020.72428      | -1021.08524                 | 0.29160 | -1020.41629 | -1020.47294 | -1020.46869 |
| <b>VIIe</b>  | -2155.45219      | -2156.24324                 | 0.50368 | -2154.91493 | -2155.00748 | -2155.00021 |
| <b>TS7e</b>  | -2155.43685      | -2156.22220                 | 0.50331 | -2154.90085 | -2154.99123 | -2154.98419 |
| <b>VIIIe</b> | -2155.46761      | -2156.25844                 | 0.50560 | -2154.92897 | -2155.02244 | -2155.01393 |
| <b>TS8e</b>  | -2155.41961      | -2156.21431                 | 0.50294 | -2154.88406 | -2154.97582 | -2154.96785 |
| <b>IXe</b>   | -2155.45028      | -2156.24398                 | 0.50451 | -2154.91251 | -2155.00736 | -2154.99810 |
| <b>TS9e</b>  | -2155.44470      | -2156.23263                 | 0.50071 | -2154.91160 | -2155.00168 | -2154.99458 |
| <b>6e</b>    | -1020.80159      | -1021.15834                 | 0.29575 | -1020.49095 | -1020.54252 | -1020.53988 |
| <b>TS11e</b> | -2155.37720      | -2156.16366                 | 0.50277 | -2154.84184 | -2154.93229 | -2154.92506 |

|              |             |             |         |             |             |             |
|--------------|-------------|-------------|---------|-------------|-------------|-------------|
| <b>Xe</b>    | -1020.68359 | -1021.04999 | 0.29312 | -1020.37534 | -1020.42692 | -1020.42447 |
| <b>TS12e</b> | -1020.67645 | -1021.04099 | 0.29198 | -1020.36955 | -1020.42104 | -1020.41844 |
| <b>8e</b>    | -1020.70062 | -1021.05969 | 0.29331 | -1020.39205 | -1020.44398 | -1020.44144 |

Notes:  $E_{\text{ele}}$ , ZPE, H, G(T), and qh-G(T) were the electronic energies, zero-point energies, sum of electronic and thermal enthalpies, sum of electronic and thermal free energies, and sum of electronic and thermal free energies using Grimme's quasiharmonic approximation, respectively, which were given at the B3LYP-D3(BJ)/def2SVP level.  $E_{\text{ele}}(\text{SP})$  were electronic energies with solvent correction at the M06/def2TZVP-SMD(dichloroethane) level.

9.5 Coordinates of all stationary points.

|           |           |           |           |                         |           |           |           |
|-----------|-----------|-----------|-----------|-------------------------|-----------|-----------|-----------|
| <b>1a</b> |           |           |           | H                       | -1.058194 | 3.443094  | 0.001699  |
| C         | 0.223343  | 1.710976  | 0.001690  | H                       | 3.123754  | -0.677028 | -2.151326 |
| C         | 1.568811  | 1.257857  | 0.000681  | H                       | 5.422055  | -1.732902 | -2.159192 |
| C         | 2.622029  | 2.177551  | -0.002096 | H                       | 5.436532  | -1.736455 | 2.137371  |
| C         | 2.346144  | 3.546529  | -0.003460 | H                       | 3.138213  | -0.680420 | 2.146652  |
| C         | 1.027369  | 4.014327  | -0.002059 | H                       | -2.496494 | -1.980571 | 0.028643  |
| C         | -0.021846 | 3.100809  | 0.000263  | H                       | -3.558696 | 1.730850  | 1.148235  |
| C         | -0.846764 | 0.782426  | 0.004961  | H                       | -3.462023 | 2.030799  | -0.591457 |
| O         | 1.745658  | -0.089083 | 0.002965  | H                       | -4.896686 | 2.610295  | 0.312380  |
| C         | 3.021640  | -0.619638 | -0.001891 | H                       | -6.772620 | -3.173514 | 0.245484  |
| C         | 3.642284  | -0.907251 | -1.219175 | H                       | -6.820625 | -1.499687 | 0.930710  |
| C         | 4.910489  | -1.490538 | -1.226319 | H                       | -6.892275 | -1.707973 | -0.805748 |
| C         | 5.531664  | -1.773867 | -0.011276 |                         |           |           |           |
| C         | 4.918671  | -1.492586 | 1.208371  | <b>[Rh<sub>2</sub>]</b> |           |           |           |
| C         | 3.650454  | -0.909233 | 1.210686  | Rh                      | -0.003812 | -0.004932 | 1.188560  |
| F         | 6.748348  | -2.333626 | -0.015819 | Rh                      | -0.004708 | -0.003925 | -1.188152 |
| C         | -1.805851 | 0.023540  | 0.010309  | O                       | 1.437811  | 1.444398  | 1.126476  |
| C         | -2.829385 | -0.933247 | 0.021087  | O                       | 1.436394  | 1.445906  | -1.125220 |
| C         | -4.190441 | -0.791359 | 0.006628  | O                       | 1.443830  | -1.445610 | -1.127166 |
| C         | -4.908933 | 0.517312  | -0.065301 | O                       | -1.453814 | 1.436944  | -1.124141 |
| O         | -6.090122 | 0.567426  | -0.363636 | O                       | -1.445115 | -1.452729 | -1.125633 |
| C         | -4.158916 | 1.801978  | 0.229711  | O                       | -1.444644 | -1.453311 | 1.126103  |
| O         | -4.323068 | -3.156136 | 0.000604  | O                       | 1.444124  | -1.446924 | 1.124543  |
| C         | -4.947716 | -2.111175 | 0.026997  | O                       | -1.452576 | 1.436521  | 1.127576  |
| C         | -6.454491 | -2.131897 | 0.108781  | C                       | -1.861124 | 1.854429  | 0.002132  |
| H         | 3.651953  | 1.821437  | -0.003136 | C                       | 1.853811  | 1.854058  | 0.000739  |
| H         | 3.177196  | 4.255736  | -0.005783 | C                       | 1.859978  | -1.855916 | -0.001714 |
| H         | 0.821700  | 5.086225  | -0.003176 | C                       | -1.861803 | -1.861761 | 0.000276  |

|           |           |           |           |    |           |           |           |
|-----------|-----------|-----------|-----------|----|-----------|-----------|-----------|
| C         | -2.963394 | -2.889155 | -0.001065 | C  | -5.147415 | 0.843533  | -1.926805 |
| C         | -2.887559 | 2.957018  | 0.000745  | C  | -5.674090 | 1.431918  | -0.779390 |
| C         | 2.954291  | 2.882909  | -0.001442 | C  | -5.041398 | 1.216417  | 0.447307  |
| C         | 2.959410  | -2.885815 | -0.000695 | F  | -5.755263 | 1.045150  | -3.105165 |
| H         | 2.935787  | -3.472124 | -0.927911 | C  | 0.113575  | 1.109226  | 2.221520  |
| H         | 2.870688  | -3.535342 | 0.879817  | C  | 0.942235  | 2.249497  | 2.154904  |
| H         | 3.927947  | -2.362892 | 0.056380  | C  | 0.780666  | 3.383169  | 1.421266  |
| H         | 2.856771  | 3.541291  | -0.874526 | C  | -0.348878 | 3.621134  | 0.466517  |
| H         | 3.921412  | 2.359536  | -0.075602 | O  | -0.139672 | 4.245799  | -0.561284 |
| H         | 2.941764  | 3.459922  | 0.931742  | C  | -1.714005 | 3.064119  | 0.770106  |
| H         | -2.361627 | 3.922918  | -0.071147 | O  | 2.981587  | 4.035355  | 2.014473  |
| H         | -3.545313 | 2.862487  | -0.873132 | C  | 1.930198  | 4.366511  | 1.496006  |
| H         | -3.465481 | 2.944259  | 0.933369  | C  | 1.744750  | 5.763124  | 0.954312  |
| H         | -2.883961 | -3.530959 | -0.888035 | H  | -4.644511 | -1.945895 | 1.790139  |
| H         | -3.930898 | -2.362980 | -0.044214 | H  | -3.773749 | -4.125658 | 2.641955  |
| H         | -2.933393 | -3.483734 | 0.920743  | H  | -1.418116 | -4.303918 | 3.447657  |
| <b>Ia</b> |           |           |           | H  | 0.077601  | -2.302785 | 3.345870  |
| C         | -1.447898 | -1.002396 | 2.559714  | H  | -2.441324 | -0.730888 | -0.584825 |
| C         | -2.786488 | -0.914040 | 2.120619  | H  | -3.610317 | -0.380921 | -2.802372 |
| C         | -3.615940 | -2.036322 | 2.143179  | H  | -6.571919 | 2.047293  | -0.856602 |
| C         | -3.120139 | -3.250379 | 2.620082  | H  | -5.422966 | 1.663622  | 1.366385  |
| C         | -1.799268 | -3.350167 | 3.077464  | H  | 1.891835  | 2.179738  | 2.697702  |
| C         | -0.968731 | -2.235361 | 3.046782  | H  | -1.739042 | 2.028053  | 0.408357  |
| C         | -0.579554 | 0.108583  | 2.388154  | H  | -1.947941 | 3.046998  | 1.842644  |
| O         | -3.243193 | 0.308215  | 1.712892  | H  | -2.462698 | 3.641770  | 0.211984  |
| C         | -3.893223 | 0.425097  | 0.501547  | H  | 2.583530  | 6.384721  | 1.292060  |
| C         | -3.362183 | -0.153094 | -0.655670 | H  | 1.706905  | 5.727223  | -0.143689 |
| C         | -3.999690 | 0.053105  | -1.879424 | H  | 0.785628  | 6.195015  | 1.279716  |
|           |           |           |           | Rh | 0.927141  | -0.421227 | 0.279127  |

|    |           |           |           |             |          |           |           |
|----|-----------|-----------|-----------|-------------|----------|-----------|-----------|
| Rh | 1.969549  | -1.291492 | -1.694884 |             |          |           |           |
| O  | -0.595630 | -1.764433 | -0.077615 | <b>TS1a</b> |          |           |           |
| O  | 0.458712  | -2.668350 | -1.845117 | C           | 1.035464 | -1.905082 | -0.877354 |
| O  | 0.868955  | 0.062578  | -2.778470 | C           | 2.191289 | -2.352645 | -0.196856 |
| O  | 2.996473  | -2.582373 | -0.478378 | C           | 2.597569 | -3.686480 | -0.290779 |
| O  | 3.444143  | 0.101196  | -1.476223 | C           | 1.869250 | -4.580137 | -1.076748 |
| O  | 2.552050  | 0.808803  | 0.460055  | C           | 0.715253 | -4.155135 | -1.745302 |
| O  | -0.021411 | 0.935630  | -0.907101 | C           | 0.287797 | -2.836284 | -1.623961 |
| O  | 1.926688  | -1.846301 | 1.364511  | C           | 0.616310 | -0.528762 | -0.762707 |
| C  | 2.748464  | -2.605380 | 0.762342  | O           | 2.812806 | -1.472712 | 0.644517  |
| C  | -0.497379 | -2.608147 | -1.023198 | C           | 4.171050 | -1.306590 | 0.663199  |
| C  | 0.131810  | 0.891308  | -2.170567 | C           | 4.705202 | -0.723866 | 1.817309  |
| C  | 3.440441  | 0.836808  | -0.445474 | C           | 6.069980 | -0.442123 | 1.892511  |
| C  | 4.579848  | 1.802720  | -0.259909 | C           | 6.887663 | -0.755859 | 0.809525  |
| C  | 3.460114  | -3.643910 | 1.591849  | C           | 6.367689 | -1.337744 | -0.344484 |
| C  | -1.639739 | -3.578179 | -1.180837 | C           | 5.001331 | -1.610844 | -0.421888 |
| C  | -0.651063 | 1.895171  | -2.970998 | F           | 8.202789 | -0.488995 | 0.877156  |
| H  | -0.336679 | 1.887193  | -4.021288 | C           | 1.153759 | 0.637411  | -0.795801 |
| H  | -0.526070 | 2.892358  | -2.523296 | C           | 1.163461 | 2.011998  | -0.608377 |
| H  | -1.720524 | 1.639733  | -2.900526 | C           | 2.330460 | 2.734687  | -0.725016 |
| H  | -1.319371 | -4.464961 | -1.741548 | C           | 3.448047 | 1.863112  | -1.100269 |
| H  | -2.447906 | -3.081210 | -1.742261 | O           | 3.168925 | 0.667601  | -1.277640 |
| H  | -2.037414 | -3.850738 | -0.194034 | C           | 4.877988 | 2.299565  | -1.269535 |
| H  | 2.862180  | -4.569793 | 1.580038  | O           | 1.187629 | 4.730974  | -0.257575 |
| H  | 4.443250  | -3.867671 | 1.158149  | C           | 2.261687 | 4.205718  | -0.499302 |
| H  | 3.557165  | -3.305614 | 2.631369  | C           | 3.518563 | 5.049299  | -0.567301 |
| H  | 4.811785  | 2.289017  | -1.217746 | H           | 3.478957 | -4.015984 | 0.261504  |
| H  | 5.472949  | 1.235926  | 0.048616  | H           | 2.195568 | -5.620329 | -1.149571 |
| H  | 4.334347  | 2.544072  | 0.510774  | H           | 0.139222 | -4.860306 | -2.348098 |

|    |           |           |           |            |           |           |           |
|----|-----------|-----------|-----------|------------|-----------|-----------|-----------|
| H  | -0.626052 | -2.489499 | -2.105448 | C          | -1.136200 | 1.945636  | 3.623391  |
| H  | 4.032710  | -0.488083 | 2.643541  | H          | -1.936800 | 2.146033  | 4.345138  |
| H  | 6.508319  | 0.011985  | 2.782898  | H          | -0.673079 | 2.892662  | 3.305597  |
| H  | 7.035655  | -1.562336 | -1.178053 | H          | -0.347561 | 1.333247  | 4.084916  |
| H  | 4.577132  | -2.030660 | -1.333161 | H          | -3.372346 | -4.010219 | 2.369142  |
| H  | 0.216499  | 2.499492  | -0.375158 | H          | -1.812001 | -3.484883 | 3.073372  |
| H  | 4.972334  | 3.060864  | -2.057687 | H          | -1.811288 | -4.327731 | 1.510721  |
| H  | 5.257561  | 2.740381  | -0.335964 | H          | -3.929215 | -2.883475 | -3.022913 |
| H  | 5.485927  | 1.423506  | -1.525143 | H          | -5.108045 | -1.569495 | -3.313578 |
| H  | 3.248407  | 6.088673  | -0.344010 | H          | -3.452264 | -1.503204 | -4.036419 |
| H  | 4.272674  | 4.702595  | 0.155401  | H          | -3.651184 | 4.331814  | -1.259313 |
| H  | 3.975077  | 5.000094  | -1.567816 | H          | -2.603381 | 3.722762  | -2.590712 |
| Rh | -1.448965 | -0.090078 | -0.157458 | H          | -1.852480 | 4.362600  | -1.117850 |
| Rh | -3.721247 | 0.192189  | 0.647923  |            |           |           |           |
| O  | -1.425636 | -1.878805 | 0.848998  | <b>IIa</b> |           |           |           |
| O  | -3.573202 | -1.666589 | 1.499611  | C          | 0.914586  | -1.881747 | -0.797157 |
| O  | -2.924047 | 1.043287  | 2.337140  | C          | 2.034151  | -2.354636 | -0.070714 |
| O  | -4.374414 | -0.667526 | -1.094869 | C          | 2.390176  | -3.704547 | -0.095161 |
| O  | -3.727537 | 2.047147  | -0.237035 | C          | 1.665244  | -4.598840 | -0.883991 |
| O  | -1.669988 | 1.727325  | -1.090950 | C          | 0.558107  | -4.153271 | -1.615001 |
| O  | -0.825322 | 0.888779  | 1.531124  | C          | 0.167552  | -2.820081 | -1.541873 |
| O  | -2.264810 | -1.016749 | -1.808347 | C          | 0.465089  | -0.498177 | -0.691712 |
| C  | -3.528692 | -1.097269 | -1.926332 | O          | 2.672322  | -1.473055 | 0.767132  |
| C  | -2.474549 | -2.287008 | 1.436824  | C          | 4.025314  | -1.280849 | 0.746311  |
| C  | -1.679156 | 1.235552  | 2.408542  | C          | 4.541080  | -0.484403 | 1.777297  |
| C  | -2.720091 | 2.421914  | -0.895155 | C          | 5.902955  | -0.188526 | 1.821306  |
| C  | -2.721181 | 3.803141  | -1.499401 | C          | 6.742600  | -0.698576 | 0.831901  |
| C  | -4.046038 | -1.796192 | -3.159655 | C          | 6.242413  | -1.485105 | -0.201351 |
| C  | -2.374088 | -3.620410 | 2.135513  | C          | 4.875911  | -1.773349 | -0.251039 |



|    |           |           |           |             |           |           |           |
|----|-----------|-----------|-----------|-------------|-----------|-----------|-----------|
| F  | 8.055901  | -0.420645 | 0.874355  | O           | -2.870170 | 1.313408  | 2.252283  |
| C  | 1.373573  | 0.556506  | -0.816139 | O           | -4.414375 | -0.539952 | -1.071183 |
| C  | 1.289540  | 1.902493  | -0.474565 | O           | -3.577261 | 2.179505  | -0.411684 |
| C  | 2.545390  | 2.497461  | -0.737937 | O           | -1.511475 | 1.690746  | -1.175082 |
| C  | 3.348149  | 1.481905  | -1.271468 | O           | -0.781878 | 0.910134  | 1.503065  |
| O  | 2.665208  | 0.339560  | -1.320827 | O           | -2.326941 | -1.020285 | -1.776990 |
| C  | 4.752442  | 1.426834  | -1.750973 | C           | -3.597214 | -1.045721 | -1.882228 |
| O  | 1.940953  | 4.643205  | -0.032057 | C           | -2.626721 | -2.124840 | 1.534952  |
| C  | 2.829976  | 3.926753  | -0.450563 | C           | -1.618059 | 1.392943  | 2.336669  |
| C  | 4.230343  | 4.458206  | -0.675438 | C           | -2.532874 | 2.446803  | -1.060159 |
| H  | 3.229681  | -4.046887 | 0.511975  | C           | -2.443264 | 3.778779  | -1.764741 |
| H  | 1.954001  | -5.652309 | -0.907397 | C           | -4.146362 | -1.772082 | -3.086754 |
| H  | -0.018161 | -4.856198 | -2.220311 | C           | -2.616701 | -3.430789 | 2.292914  |
| H  | -0.722820 | -2.465075 | -2.059758 | C           | -1.022225 | 2.129577  | 3.511582  |
| H  | 3.854078  | -0.101438 | 2.533441  | H           | -1.810106 | 2.462878  | 4.197347  |
| H  | 6.324015  | 0.426920  | 2.618264  | H           | -0.455478 | 2.998147  | 3.141577  |
| H  | 6.924456  | -1.860792 | -0.966269 | H           | -0.311581 | 1.473138  | 4.035332  |
| H  | 4.474758  | -2.367542 | -1.071074 | H           | -3.626845 | -3.686403 | 2.634875  |
| H  | 0.420944  | 2.387596  | -0.049758 | H           | -1.950010 | -3.330335 | 3.163969  |
| H  | 5.024891  | 2.324608  | -2.319913 | H           | -2.206837 | -4.227269 | 1.655660  |
| H  | 5.442589  | 1.340449  | -0.895069 | H           | -3.983486 | -2.853664 | -2.954573 |
| H  | 4.892216  | 0.538144  | -2.378766 | H           | -5.220128 | -1.578252 | -3.196175 |
| H  | 4.281496  | 5.490287  | -0.306927 | H           | -3.602126 | -1.462929 | -3.990466 |
| H  | 4.980783  | 3.838749  | -0.160071 | H           | -3.369234 | 4.350459  | -1.631111 |
| H  | 4.476091  | 4.448590  | -1.750035 | H           | -2.248116 | 3.615265  | -2.835180 |
| Rh | -1.437604 | -0.094600 | -0.163160 | H           | -1.588854 | 4.343281  | -1.359418 |
| Rh | -3.718175 | 0.399348  | 0.617559  |             |           |           |           |
| O  | -1.557222 | -1.841367 | 0.904605  | <b>TS2a</b> |           |           |           |
| O  | -3.664949 | -1.413595 | 1.590596  | C           | -1.215547 | 2.286948  | -0.220850 |

|   |           |           |           |    |           |           |           |
|---|-----------|-----------|-----------|----|-----------|-----------|-----------|
| C | -1.679926 | 3.359324  | 0.561532  | H  | -2.306522 | -3.947959 | -0.476940 |
| C | -1.666647 | 4.679834  | 0.106584  | H  | -0.161124 | 1.610853  | 2.249159  |
| C | -1.242745 | 4.947149  | -1.192056 | H  | -0.244701 | -0.811240 | 2.855988  |
| C | -0.856463 | 3.890839  | -2.027670 | H  | -4.476612 | -0.444230 | 3.501598  |
| C | -0.843470 | 2.584853  | -1.547407 | H  | -4.422872 | 1.938210  | 2.663991  |
| C | -1.095973 | 0.896287  | 0.292315  | H  | -6.301985 | -0.640680 | -3.636887 |
| C | -2.310487 | 1.868495  | 2.253808  | H  | -5.850166 | 0.534410  | -2.353414 |
| O | -2.317702 | 3.123831  | 1.765675  | H  | -4.703511 | 0.183935  | -3.658711 |
| C | -2.132034 | 0.020446  | -0.192223 | F  | -2.425885 | -1.993370 | 3.676472  |
| C | -3.163090 | 0.203954  | -1.091304 | Rh | 0.925954  | 0.045566  | 0.040521  |
| C | -3.769938 | -1.073791 | -1.311301 | Rh | 3.105357  | -0.928646 | -0.497211 |
| C | -3.078803 | -1.962181 | -0.491852 | O  | 1.656856  | 1.790495  | -0.763492 |
| O | -2.112333 | -1.310239 | 0.162534  | O  | 3.628468  | 0.865026  | -1.341557 |
| C | -3.226961 | -3.406969 | -0.201014 | O  | 3.744412  | -0.239955 | 1.336110  |
| C | -1.115914 | 1.083517  | 2.196700  | O  | 2.297206  | -1.540643 | -2.284527 |
| C | -1.154536 | -0.218064 | 2.812555  | O  | 2.467983  | -2.674473 | 0.380723  |
| C | -2.352248 | -0.734812 | 3.215033  | O  | 0.464300  | -1.774164 | 0.880731  |
| C | -3.546451 | 0.020939  | 3.169430  | O  | 1.725268  | 0.625379  | 1.840797  |
| C | -3.520268 | 1.327836  | 2.707490  | O  | 0.299999  | -0.604412 | -1.809567 |
| O | -5.353886 | -2.534933 | -2.287471 | C  | 1.097358  | -1.262034 | -2.552414 |
| C | -4.901614 | -1.405774 | -2.202931 | C  | 2.818255  | 1.830482  | -1.274457 |
| C | -5.479199 | -0.263925 | -3.016632 | C  | 2.951431  | 0.378505  | 2.092607  |
| H | -2.030086 | 5.466482  | 0.769690  | C  | 1.307325  | -2.723562 | 0.871668  |
| H | -1.235364 | 5.975614  | -1.559543 | C  | 0.852259  | -4.029019 | 1.479923  |
| H | -0.543500 | 4.089492  | -3.055094 | C  | 0.529591  | -1.779778 | -3.852068 |
| H | -0.506336 | 1.763404  | -2.178608 | C  | 3.266720  | 3.165965  | -1.816595 |
| H | -3.428127 | 1.152747  | -1.548403 | C  | 3.485968  | 0.905870  | 3.401558  |
| H | -3.377291 | -3.556690 | 0.881279  | H  | 2.729905  | 0.800091  | 4.191715  |
| H | -4.077020 | -3.809287 | -0.762226 | H  | 3.701583  | 1.980392  | 3.285629  |

|             |           |           |           |    |           |           |           |
|-------------|-----------|-----------|-----------|----|-----------|-----------|-----------|
| H           | 4.412328  | 0.386422  | 3.675609  | C  | -2.653075 | 1.220132  | 3.191089  |
| H           | 3.735749  | 3.736217  | -0.998329 | C  | -3.725613 | 2.104020  | 2.865273  |
| H           | 2.402400  | 3.738670  | -2.177871 | C  | -3.650203 | 2.906848  | 1.741841  |
| H           | 4.011666  | 3.025940  | -2.610364 | O  | -4.401053 | -4.024276 | -1.345092 |
| H           | 0.022528  | -2.738326 | -3.654790 | C  | -3.902608 | -3.022406 | -1.831485 |
| H           | -0.217079 | -1.079668 | -4.249676 | C  | -3.890300 | -2.803103 | -3.332810 |
| H           | 1.332490  | -1.953823 | -4.579344 | H  | -1.858643 | 5.257840  | -2.039067 |
| H           | 0.497210  | -4.687021 | 0.669959  | H  | -0.808946 | 4.583794  | -4.222221 |
| H           | 0.023768  | -3.858073 | 2.179566  | H  | -0.130371 | 2.201280  | -4.568760 |
| H           | 1.692525  | -4.532282 | 1.976608  | H  | -0.355777 | 0.557528  | -2.724297 |
|             |           |           |           | H  | -2.600638 | -0.383487 | -2.479306 |
| <b>IIIa</b> |           |           |           | H  | -4.158214 | -2.431816 | 2.182692  |
| C           | -1.216659 | 1.952381  | -1.333025 | H  | -4.075665 | -3.769226 | 0.979648  |
| C           | -1.655317 | 3.285848  | -1.203759 | H  | -2.636699 | -3.315918 | 1.957381  |
| C           | -1.500927 | 4.241609  | -2.212248 | H  | -0.443846 | 2.445607  | 1.210369  |
| C           | -0.938341 | 3.852288  | -3.421766 | H  | -0.757282 | 0.396543  | 2.676394  |
| C           | -0.562208 | 2.512570  | -3.614885 | H  | -4.600531 | 2.123241  | 3.517853  |
| C           | -0.702879 | 1.581309  | -2.593211 | H  | -4.453466 | 3.593142  | 1.470277  |
| C           | -1.310148 | 1.043371  | -0.173245 | H  | -4.378841 | -3.651541 | -3.828022 |
| C           | -2.507967 | 2.839626  | 0.934364  | H  | -4.414016 | -1.868793 | -3.592329 |
| O           | -2.440452 | 3.641335  | -0.124761 | H  | -2.854618 | -2.703790 | -3.696920 |
| C           | -2.173763 | -0.106604 | -0.344322 | F  | -2.798061 | 0.481083  | 4.303029  |
| C           | -2.677956 | -0.741883 | -1.458907 | Rh | 0.828782  | 0.062046  | 0.063105  |
| C           | -3.270538 | -1.970139 | -1.010431 | Rh | 3.021798  | -0.993635 | 0.215034  |
| C           | -3.124152 | -1.984873 | 0.369066  | O  | 1.708828  | 1.432208  | -1.189622 |
| O           | -2.478990 | -0.868531 | 0.758406  | O  | 3.703020  | 0.382894  | -1.144769 |
| C           | -3.527490 | -2.934802 | 1.430545  | O  | 3.440541  | 0.315449  | 1.744942  |
| C           | -1.400470 | 1.892939  | 1.175221  | O  | 2.444007  | -2.232162 | -1.319234 |
| C           | -1.547848 | 1.099440  | 2.421955  | O  | 2.214600  | -2.313603 | 1.563800  |

|             |           |           |           |   |           |           |           |
|-------------|-----------|-----------|-----------|---|-----------|-----------|-----------|
| O           | 0.173623  | -1.372085 | 1.389952  | C | -1.431924 | 3.101576  | -3.005329 |
| O           | 1.392736  | 1.252305  | 1.642479  | C | -1.394479 | 2.001216  | -2.150348 |
| O           | 0.446905  | -1.203590 | -1.514043 | C | -1.831798 | 1.088453  | 0.217685  |
| C           | 1.309648  | -2.076357 | -1.848321 | C | -2.860525 | 2.191302  | 1.477049  |
| C           | 2.923767  | 1.299511  | -1.530942 | O | -3.036139 | 3.351290  | 0.778796  |
| C           | 2.566060  | 1.138991  | 2.125621  | C | -2.320880 | -0.230265 | -0.094372 |
| C           | 0.987465  | -2.234256 | 1.846974  | C | -2.924283 | -0.731876 | -1.223955 |
| C           | 0.415759  | -3.269168 | 2.785967  | C | -2.912879 | -2.163146 | -1.101219 |
| C           | 0.924677  | -2.989647 | -2.987198 | C | -2.341886 | -2.435181 | 0.133175  |
| C           | 3.480751  | 2.353038  | -2.457078 | O | -2.014183 | -1.280822 | 0.735814  |
| C           | 2.934914  | 2.100289  | 3.228843  | C | -2.036443 | -3.683068 | 0.869504  |
| H           | 2.074511  | 2.264227  | 3.892110  | C | -1.502060 | 1.632627  | 1.646645  |
| H           | 3.200231  | 3.069608  | 2.776459  | C | -1.376102 | 0.677030  | 2.773343  |
| H           | 3.797632  | 1.725990  | 3.793424  | C | -2.481314 | 0.168180  | 3.349943  |
| H           | 3.818331  | 3.209723  | -1.851434 | C | -3.815226 | 0.598449  | 3.019894  |
| H           | 2.696373  | 2.709029  | -3.138380 | C | -3.989619 | 1.621918  | 2.130959  |
| H           | 4.341441  | 1.959797  | -3.012758 | O | -3.153164 | -4.359042 | -1.943310 |
| H           | -0.066490 | -3.423560 | -2.789047 | C | -3.350088 | -3.162360 | -2.092307 |
| H           | 0.847642  | -2.397814 | -3.912850 | C | -4.035808 | -2.631439 | -3.336352 |
| H           | 1.670639  | -3.782113 | -3.120161 | H | -2.849111 | 5.412862  | -0.903246 |
| H           | -0.035145 | -4.074883 | 2.183973  | H | -1.935644 | 5.196923  | -3.236240 |
| H           | -0.375268 | -2.825430 | 3.405417  | H | -1.059066 | 3.001451  | -4.027206 |
| H           | 1.206560  | -3.702614 | 3.410827  | H | -0.974718 | 1.051672  | -2.479991 |
|             |           |           |           | H | -3.278383 | -0.143143 | -2.064175 |
| <b>TS3a</b> |           |           |           | H | -2.439043 | -3.634290 | 1.894148  |
| C           | -1.851836 | 2.123212  | -0.828476 | H | -2.451816 | -4.541307 | 0.330533  |
| C           | -2.401099 | 3.356940  | -0.435827 | H | -0.943698 | -3.806810 | 0.956605  |
| C           | -2.418320 | 4.477383  | -1.263238 | H | -0.682855 | 2.358818  | 1.598884  |
| C           | -1.922062 | 4.338975  | -2.560278 | H | -0.384192 | 0.352234  | 3.077529  |

|    |           |           |           |            |           |           |           |
|----|-----------|-----------|-----------|------------|-----------|-----------|-----------|
| H  | -4.657502 | 0.121058  | 3.522673  | H          | 3.226801  | 2.137347  | -3.844599 |
| H  | -4.975379 | 2.027230  | 1.898323  | H          | -0.311659 | -3.573714 | -2.227066 |
| H  | -4.343628 | -3.472857 | -3.969639 | H          | 0.072873  | -2.527696 | -3.601227 |
| H  | -4.912171 | -2.019369 | -3.069698 | H          | 1.288270  | -3.731664 | -3.043449 |
| H  | -3.346929 | -1.980018 | -3.899037 | H          | 1.245287  | -3.975392 | 2.521132  |
| F  | -2.379710 | -0.771898 | 4.305637  | H          | 0.433932  | -2.730495 | 3.522113  |
| Rh | 0.852844  | 0.196917  | 0.085832  | H          | 2.217163  | -3.011958 | 3.650828  |
| Rh | 3.072371  | -0.654516 | -0.200973 |            |           |           |           |
| O  | 1.298526  | 1.591586  | -1.338334 | <b>IVa</b> |           |           |           |
| O  | 3.311280  | 0.670540  | -1.742004 | C          | -2.113671 | -0.689693 | -0.484451 |
| O  | 3.699066  | 0.780912  | 1.124106  | C          | -3.187671 | -0.152104 | 0.239225  |
| O  | 2.294536  | -2.051750 | -1.485873 | C          | -4.431502 | -0.770284 | 0.289807  |
| O  | 2.748774  | -1.940078 | 1.354698  | C          | -4.573484 | -1.982525 | -0.399631 |
| O  | 0.618278  | -1.241470 | 1.535905  | C          | -3.505272 | -2.545422 | -1.109610 |
| O  | 1.590186  | 1.473379  | 1.510517  | C          | -2.262288 | -1.898788 | -1.156511 |
| O  | 0.248199  | -1.125684 | -1.349031 | C          | -0.941595 | 0.224754  | -0.342450 |
| C  | 1.066212  | -1.994698 | -1.785129 | C          | -1.529108 | 1.330491  | 0.559001  |
| C  | 2.403508  | 1.527155  | -1.956422 | O          | -2.861199 | 1.009493  | 0.883577  |
| C  | 2.846962  | 1.516621  | 1.700203  | C          | 0.405830  | -0.322133 | -0.154645 |
| C  | 1.595458  | -1.972277 | 1.876562  | C          | 1.593873  | -0.195740 | -0.809746 |
| C  | 1.352162  | -2.976688 | 2.974290  | C          | 2.548385  | -1.019580 | -0.106387 |
| C  | 0.507227  | -3.031698 | -2.724543 | C          | 1.852588  | -1.594669 | 0.942447  |
| C  | 2.663866  | 2.573850  | -3.008682 | O          | 0.569063  | -1.173554 | 0.913863  |
| C  | 3.357062  | 2.554070  | 2.666989  | C          | 2.240288  | -2.530112 | 2.025465  |
| H  | 2.636115  | 2.700553  | 3.482222  | C          | -1.187059 | 1.624532  | -0.920531 |
| H  | 3.459955  | 3.510918  | 2.129785  | C          | -0.101661 | 2.589224  | -1.144784 |
| H  | 4.340122  | 2.264854  | 3.058734  | C          | 0.634610  | 3.040150  | -0.107689 |
| H  | 3.283220  | 3.369885  | -2.564731 | C          | 0.315865  | 2.764852  | 1.275382  |
| H  | 1.718907  | 3.013535  | -3.351486 | C          | -0.763800 | 2.014385  | 1.594710  |

|             |           |           |           |   |           |           |           |
|-------------|-----------|-----------|-----------|---|-----------|-----------|-----------|
| O           | 4.702101  | -1.942641 | 0.238153  | O | 0.689068  | 3.722521  | -0.410228 |
| C           | 3.980635  | -1.209909 | -0.417615 | C | -2.347829 | 0.746634  | 0.066901  |
| C           | 4.521661  | -0.436839 | -1.605704 | C | -3.506090 | 0.626071  | -0.660956 |
| H           | -5.251694 | -0.328005 | 0.857039  | C | -4.337115 | -0.338494 | 0.014625  |
| H           | -5.536239 | -2.498393 | -0.375429 | C | -3.627474 | -0.736826 | 1.131601  |
| H           | -3.643010 | -3.493748 | -1.633186 | O | -2.453246 | -0.074513 | 1.168481  |
| H           | -1.423585 | -2.330227 | -1.707427 | C | -3.893053 | -1.699588 | 2.226068  |
| H           | 1.774058  | 0.423146  | -1.683257 | C | -0.455920 | 2.152516  | 1.061347  |
| H           | 3.303067  | -2.774847 | 1.920603  | C | -0.817464 | 1.898258  | 2.438050  |
| H           | 2.058940  | -2.077334 | 3.014388  | C | -0.193608 | 2.588278  | 3.454219  |
| H           | 1.641067  | -3.454331 | 1.973096  | C | 0.707917  | 3.627364  | 3.209329  |
| H           | -2.024395 | 1.664662  | -1.623013 | C | 0.984797  | 3.983321  | 1.888194  |
| H           | 0.084966  | 2.970044  | -2.150373 | O | -6.273596 | -1.682468 | 0.236319  |
| H           | 0.926159  | 3.245989  | 2.041663  | C | -5.668814 | -0.830132 | -0.393593 |
| H           | -1.099658 | 1.891179  | 2.625758  | C | -6.256621 | -0.224350 | -1.654125 |
| H           | 5.589463  | -0.658361 | -1.725846 | H | 1.030945  | 4.672004  | -2.715253 |
| H           | 3.980177  | -0.712217 | -2.525380 | H | 0.029350  | 3.818423  | -4.863513 |
| H           | 4.380566  | 0.646312  | -1.458413 | H | -1.471718 | 1.812804  | -4.785454 |
| F           | 1.664519  | 3.877356  | -0.314742 | H | -1.945790 | 0.712920  | -2.627966 |
|             |           |           |           | H | -3.752301 | 1.171056  | -1.564858 |
| <b>TS4a</b> |           |           |           | H | -3.901957 | -1.190590 | 3.204790  |
| C           | -0.841355 | 2.113037  | -1.427043 | H | -4.863838 | -2.177620 | 2.054218  |
| C           | 0.037365  | 3.207640  | -1.518938 | H | -3.100441 | -2.465921 | 2.261958  |
| C           | 0.347073  | 3.821867  | -2.726141 | H | 0.412463  | 1.253422  | 0.981208  |
| C           | -0.210113 | 3.337498  | -3.912876 | H | -1.488081 | 1.079377  | 2.673032  |
| C           | -1.053736 | 2.227307  | -3.865410 | H | 1.177450  | 4.143182  | 4.048055  |
| C           | -1.350003 | 1.622626  | -2.643085 | H | 1.650875  | 4.814444  | 1.653241  |
| C           | -1.089833 | 1.462406  | -0.124280 | H | -7.242520 | -0.666828 | -1.843770 |
| C           | 0.390790  | 3.304420  | 0.829517  | H | -6.352440 | 0.868610  | -1.550020 |

|    |           |           |           |             |           |           |           |
|----|-----------|-----------|-----------|-------------|-----------|-----------|-----------|
| H  | -5.594441 | -0.409975 | -2.515431 | H           | -0.093147 | -2.518906 | 4.004261  |
| F  | -0.464680 | 2.251690  | 4.725802  | H           | 0.591672  | -0.931443 | 4.423839  |
| Rh | 0.626877  | -0.221360 | -0.082935 | H           | 1.651063  | -2.399125 | 4.368431  |
| Rh | 2.182084  | -2.116250 | -0.173015 |             |           |           |           |
| O  | 1.020382  | 0.054645  | -2.068873 | <b>TS5a</b> |           |           |           |
| O  | 2.376844  | -1.742884 | -2.184489 | Rh          | 0.840524  | -0.103760 | 0.055130  |
| O  | 3.711265  | -0.793101 | 0.202825  | Rh          | 2.674720  | -1.669949 | -0.267182 |
| O  | 0.552675  | -3.317673 | -0.534183 | O           | 1.991294  | 1.257413  | -0.952082 |
| O  | 1.892714  | -2.363040 | 1.850241  | O           | 3.649035  | -0.220086 | -1.332788 |
| O  | 0.376975  | -0.697317 | 1.910208  | O           | -0.131526 | -1.610886 | 1.084866  |
| O  | 2.291815  | 0.954169  | 0.322295  | O           | 1.592621  | -3.038303 | 0.824830  |
| O  | -0.842687 | -1.548515 | -0.582562 | O           | 3.507342  | -0.933591 | 1.458051  |
| C  | -0.584995 | -2.791414 | -0.670882 | O           | 1.763325  | 0.450109  | 1.808680  |
| C  | 1.793470  | -0.743087 | -2.687291 | O           | 0.094257  | -0.781256 | -1.740380 |
| C  | 3.453504  | 0.426633  | 0.362571  | O           | 1.737951  | -2.305282 | -1.976813 |
| C  | 1.058607  | -1.631538 | 2.444726  | C           | 3.120462  | 0.925959  | -1.422151 |
| C  | 0.800059  | -1.880023 | 3.910226  | C           | 0.682491  | -1.723512 | -2.355363 |
| C  | -1.750726 | -3.690680 | -0.999270 | C           | 2.885563  | -0.058651 | 2.121367  |
| C  | 2.047586  | -0.433904 | -4.141396 | C           | 0.442614  | -2.736053 | 1.240007  |
| C  | 4.597705  | 1.378560  | 0.606146  | C           | 3.500748  | 0.404390  | 3.419484  |
| H  | 4.369951  | 2.014726  | 1.473630  | H           | 3.134288  | -0.242827 | 4.233230  |
| H  | 4.701709  | 2.040286  | -0.267953 | H           | 4.593654  | 0.313100  | 3.377039  |
| H  | 5.532155  | 0.827636  | 0.765476  | H           | 3.199585  | 1.437308  | 3.637364  |
| H  | 2.989052  | 0.133929  | -4.217189 | C           | 3.906585  | 2.007304  | -2.120230 |
| H  | 1.235853  | 0.182021  | -4.548804 | H           | 3.240497  | 2.822212  | -2.430210 |
| H  | 2.167751  | -1.365036 | -4.710969 | H           | 4.651173  | 2.408639  | -1.413922 |
| H  | -2.690334 | -3.245968 | -0.645333 | H           | 4.449350  | 1.586759  | -2.977572 |
| H  | -1.810983 | -3.800139 | -2.094282 | C           | -0.350919 | -3.803247 | 1.955887  |
| H  | -1.595849 | -4.687065 | -0.565509 | H           | -0.944499 | -3.359045 | 2.766710  |

|   |           |           |           |             |           |           |           |
|---|-----------|-----------|-----------|-------------|-----------|-----------|-----------|
| H | -1.050585 | -4.261449 | 1.237675  | C           | -2.645739 | -0.573413 | -0.117605 |
| H | 0.313712  | -4.585317 | 2.343050  | O           | -2.775808 | 1.167128  | -1.523071 |
| C | 0.069082  | -2.159800 | -3.663533 | C           | -3.768882 | -0.763188 | -0.984929 |
| H | 0.431768  | -3.155647 | -3.946566 | H           | -2.237405 | -1.257498 | 0.615700  |
| H | -1.026970 | -2.147936 | -3.588367 | C           | -3.784538 | 0.330607  | -1.839087 |
| H | 0.360899  | -1.440603 | -4.445808 | C           | -4.655587 | 0.705351  | -2.977092 |
| C | -0.984373 | 1.366139  | 0.101874  | H           | -5.461888 | -0.031003 | -3.068480 |
| C | -0.440155 | 2.601765  | -0.458379 | H           | -5.075378 | 1.714165  | -2.831858 |
| C | 0.944763  | 4.464052  | 0.325347  | H           | -4.073887 | 0.725495  | -3.914362 |
| C | -1.109809 | 1.889554  | 1.766042  | C           | -4.732656 | -1.883929 | -0.962555 |
| C | -2.444425 | 2.489571  | 1.607621  | C           | -4.552214 | -2.889093 | 0.158970  |
| C | -1.030730 | 0.805483  | 2.739106  | H           | -3.554602 | -3.354550 | 0.103995  |
| C | -3.576148 | 1.769513  | 1.926605  | H           | -4.619133 | -2.379912 | 1.133986  |
| H | -2.509897 | 3.445422  | 1.087866  | H           | -5.326863 | -3.662302 | 0.085022  |
| C | -2.155876 | 0.101433  | 3.052701  | O           | -5.632318 | -1.992838 | -1.778081 |
| H | -0.041379 | 0.523871  | 3.092984  | F           | -4.482361 | -0.217334 | 2.813662  |
| C | -3.411186 | 0.534068  | 2.555498  |             |           |           |           |
| H | -4.578884 | 2.122666  | 1.682255  | <b>TS6a</b> |           |           |           |
| H | -2.119806 | -0.789574 | 3.681055  | C           | -2.107787 | -0.763650 | -0.194273 |
| O | -0.063695 | 2.830873  | 1.819653  | C           | -3.103752 | -0.250830 | 0.642284  |
| C | 1.084610  | 4.872598  | -1.010334 | C           | -4.283053 | -0.936418 | 0.903579  |
| C | 0.464000  | 4.168053  | -2.048824 | C           | -4.435948 | -2.190725 | 0.295175  |
| C | -0.304632 | 3.029543  | -1.781552 | C           | -3.444144 | -2.723796 | -0.537907 |
| H | -0.765357 | 2.457102  | -2.586134 | C           | -2.264247 | -2.008415 | -0.791342 |
| H | 0.583679  | 4.508117  | -3.079938 | C           | -0.992650 | 0.248762  | -0.252033 |
| H | 1.677833  | 5.761671  | -1.236807 | C           | -1.512512 | 1.315494  | 0.662845  |
| H | 1.410956  | 5.007268  | 1.148514  | O           | -2.769625 | 0.978325  | 1.150207  |
| C | 0.174159  | 3.339723  | 0.571027  | C           | 0.395421  | -0.253112 | -0.139967 |
| C | -2.054779 | 0.622540  | -0.471563 | C           | 1.306501  | -0.332259 | 0.865943  |



|   |           |           |           |           |           |           |           |
|---|-----------|-----------|-----------|-----------|-----------|-----------|-----------|
| C | 2.477643  | -0.972751 | 0.311919  | <b>2a</b> |           |           |           |
| C | 2.177718  | -1.236893 | -1.011949 | C         | -2.067101 | -0.465884 | -0.593907 |
| O | 0.923484  | -0.803292 | -1.281739 | C         | -2.987532 | -0.375352 | 0.449966  |
| C | 2.935977  | -1.865156 | -2.120087 | C         | -4.125936 | -1.168325 | 0.516564  |
| C | -1.280346 | 1.397677  | -1.189951 | C         | -4.320246 | -2.086564 | -0.524446 |
| C | -0.317943 | 2.375870  | -1.535838 | C         | -3.405316 | -2.196244 | -1.579625 |
| C | 0.548760  | 2.931157  | -0.620089 | C         | -2.263122 | -1.383103 | -1.618461 |
| C | 0.314032  | 2.944321  | 0.771462  | C         | -0.945349 | 0.530211  | -0.328316 |
| C | -0.761385 | 2.299407  | 1.344271  | C         | -1.462826 | 1.165739  | 0.968617  |
| O | 4.680246  | -1.834441 | 0.438954  | O         | -2.637550 | 0.581248  | 1.370094  |
| C | 3.750980  | -1.277208 | 0.998467  | C         | -0.850785 | 1.615841  | -1.380179 |
| C | 3.850915  | -0.856370 | 2.452583  | C         | -0.080426 | 2.719362  | -1.247113 |
| H | -5.045752 | -0.513647 | 1.558823  | C         | 0.610072  | 3.138242  | -0.055537 |
| H | -5.348294 | -2.762588 | 0.479783  | C         | 0.253654  | 2.919630  | 1.240242  |
| H | -3.591935 | -3.704274 | -0.995168 | C         | -0.871946 | 2.147090  | 1.686319  |
| H | -1.483929 | -2.412552 | -1.439170 | C         | 0.374930  | -0.165053 | -0.124657 |
| H | 1.167272  | 0.037358  | 1.877106  | C         | 1.591279  | -0.109573 | -0.731582 |
| H | 3.927849  | -2.151375 | -1.752977 | C         | 2.431051  | -1.076737 | -0.059598 |
| H | 2.410759  | -2.759422 | -2.495315 | C         | 1.642011  | -1.651975 | 0.919260  |
| H | 3.040536  | -1.165334 | -2.965666 | O         | 0.405333  | -1.102167 | 0.874950  |
| H | -2.170154 | 1.282844  | -1.813777 | F         | 1.646733  | 3.973586  | -0.290272 |
| H | -0.321238 | 2.787103  | -2.548744 | C         | 1.889042  | -2.692786 | 1.945402  |
| H | 0.924790  | 3.625986  | 1.367246  | O         | 4.468026  | -2.234625 | 0.286530  |
| H | -1.106828 | 2.575509  | 2.342781  | C         | 3.848525  | -1.389407 | -0.337504 |
| H | 4.838103  | -1.133698 | 2.842757  | C         | 4.509038  | -0.596444 | -1.449639 |
| H | 3.704625  | 0.231680  | 2.549923  | H         | -4.829310 | -1.073110 | 1.344712  |
| H | 3.064555  | -1.344191 | 3.051271  | H         | -5.203332 | -2.729475 | -0.508248 |
| F | 1.532412  | 3.734583  | -1.072089 | H         | -3.581015 | -2.923679 | -2.374737 |
|   |           |           |           | H         | -1.537459 | -1.473207 | -2.430373 |

|           |           |           |           |           |           |           |           |
|-----------|-----------|-----------|-----------|-----------|-----------|-----------|-----------|
| H         | -1.431668 | 1.471860  | -2.294418 | C         | -1.769748 | 2.041257  | -0.728251 |
| H         | 0.021150  | 3.399073  | -2.099325 | C         | -2.598294 | 2.881429  | 0.005775  |
| H         | 0.829427  | 3.466998  | 1.991447  | C         | -3.287719 | 2.427426  | 1.129685  |
| H         | -1.298856 | 2.379820  | 2.664962  | C         | -3.146585 | 1.095611  | 1.512138  |
| H         | 1.864004  | 0.550121  | -1.548857 | O         | 5.063954  | 0.817233  | 0.831215  |
| H         | 2.925312  | -3.037839 | 1.858380  | C         | 4.141390  | 0.019570  | 0.837211  |
| H         | 1.715846  | -2.290165 | 2.957243  | C         | 4.257866  | -1.306656 | 1.564672  |
| H         | 1.202390  | -3.544720 | 1.808726  | H         | -2.526981 | -3.557788 | 1.610710  |
| H         | 5.552848  | -0.918154 | -1.553042 | H         | -1.636636 | -5.401464 | 0.161856  |
| H         | 3.977172  | -0.750188 | -2.402683 | H         | -0.344215 | -4.836464 | -1.904220 |
| H         | 4.472310  | 0.482720  | -1.228766 | H         | 0.083253  | -2.449216 | -2.473427 |
|           |           |           |           | H         | 1.574674  | -1.563448 | 0.524588  |
| <b>7a</b> |           |           |           | H         | 2.724101  | 3.544136  | -0.504969 |
| C         | -0.977381 | -1.669594 | -0.773054 | H         | 4.261992  | 2.618708  | -0.430307 |
| C         | -1.711854 | -2.005668 | 0.371223  | H         | 3.370026  | 2.791421  | -1.979632 |
| C         | -1.948012 | -3.343237 | 0.710998  | H         | -0.731964 | -0.037044 | -2.148787 |
| C         | -1.451414 | -4.357999 | -0.103035 | H         | -1.226492 | 2.437525  | -1.587234 |
| C         | -0.728143 | -4.042608 | -1.260431 | H         | -3.928878 | 3.115341  | 1.682922  |
| C         | -0.496598 | -2.706291 | -1.583094 | H         | -3.677839 | 0.694382  | 2.376474  |
| C         | -0.648908 | -0.221177 | -1.063272 | H         | 5.249696  | -1.379589 | 2.028006  |
| C         | -2.316768 | 0.241543  | 0.778454  | H         | 3.478625  | -1.391478 | 2.339513  |
| O         | -2.237069 | -1.058145 | 1.205203  | H         | 4.111167  | -2.145888 | 0.865488  |
| C         | 0.769394  | 0.078861  | -0.662363 | F         | -2.734499 | 4.161820  | -0.373245 |
| C         | 1.699840  | -0.580418 | 0.080335  |           |           |           |           |
| C         | 2.860081  | 0.281199  | 0.147785  | <b>5e</b> |           |           |           |
| C         | 2.535266  | 1.416183  | -0.570522 | C         | 1.169742  | 1.789044  | -0.046546 |
| O         | 1.275900  | 1.289793  | -1.058833 | C         | 2.487541  | 1.248674  | -0.045000 |
| C         | 3.267922  | 2.664949  | -0.888850 | C         | 3.568292  | 2.143512  | -0.022298 |
| C         | -1.615721 | 0.704525  | -0.342481 | C         | 3.374241  | 3.525016  | -0.013603 |

|   |           |           |           |             |           |           |           |
|---|-----------|-----------|-----------|-------------|-----------|-----------|-----------|
| C | 2.078616  | 4.052697  | -0.028306 | H           | -2.501829 | 2.399751  | -0.623580 |
| C | 0.988278  | 3.190382  | -0.044197 | H           | -3.892446 | 3.110553  | 0.253148  |
| C | 0.019577  | 0.955565  | -0.004696 | H           | -6.199040 | -2.499034 | 0.450070  |
| C | 2.740636  | -0.212651 | -0.053248 | H           | -6.099436 | -0.796582 | 1.054220  |
| C | 2.079551  | -1.068621 | -0.952440 | H           | -6.222789 | -1.080466 | -0.669318 |
| C | 2.337586  | -2.438422 | -0.964393 |             |           |           |           |
| C | 3.265760  | -2.958410 | -0.064952 | <b>VIIe</b> |           |           |           |
| C | 3.942358  | -2.141154 | 0.837001  | C           | 1.775685  | 0.767711  | 2.489534  |
| C | 3.677173  | -0.771931 | 0.834241  | C           | 3.014445  | 1.095027  | 1.872156  |
| F | 3.515086  | -4.273882 | -0.069398 | C           | 4.190785  | 0.612010  | 2.460263  |
| C | -1.004281 | 0.288805  | 0.044776  | C           | 4.157821  | -0.172006 | 3.615171  |
| C | -2.096833 | -0.587731 | 0.098902  | C           | 2.934570  | -0.500754 | 4.209264  |
| C | -3.441976 | -0.342943 | 0.073673  | C           | 1.750468  | -0.036020 | 3.645633  |
| C | -4.056987 | 1.013350  | -0.061508 | C           | 0.550022  | 1.182410  | 1.900312  |
| O | -5.225054 | 1.138906  | -0.386515 | C           | 3.060332  | 1.842898  | 0.592859  |
| C | -3.216160 | 2.247764  | 0.200520  | C           | 2.343926  | 3.035690  | 0.400638  |
| O | -3.759780 | -2.688481 | 0.145782  | C           | 2.325365  | 3.673394  | -0.838624 |
| C | -4.300430 | -1.597737 | 0.148362  | C           | 3.036883  | 3.110450  | -1.893023 |
| C | -5.801744 | -1.494103 | 0.257723  | C           | 3.787128  | 1.949611  | -1.731786 |
| H | 4.582985  | 1.740608  | -0.035539 | C           | 3.793556  | 1.323525  | -0.486763 |
| H | 4.238561  | 4.193071  | -0.005407 | F           | 2.989094  | 3.693613  | -3.101712 |
| H | 1.921453  | 5.133322  | -0.026016 | C           | -0.492687 | 1.646115  | 1.440380  |
| H | -0.029473 | 3.584636  | -0.042257 | C           | -1.542116 | 2.435785  | 0.931393  |
| H | 1.365328  | -0.655969 | -1.665547 | C           | -2.885627 | 2.319741  | 1.108064  |
| H | 1.834821  | -3.108470 | -1.663743 | C           | -3.533534 | 1.217963  | 1.886903  |
| H | 4.658007  | -2.584944 | 1.531034  | O           | -4.669840 | 0.863109  | 1.618173  |
| H | 4.189873  | -0.127157 | 1.551000  | C           | -2.771327 | 0.538863  | 3.000673  |
| H | -1.842381 | -1.655556 | 0.153873  | O           | -3.153807 | 4.141154  | -0.379617 |
| H | -2.626389 | 2.161152  | 1.124431  | C           | -3.712701 | 3.340518  | 0.347213  |

|    |           |           |           |             |           |           |           |
|----|-----------|-----------|-----------|-------------|-----------|-----------|-----------|
| C  | -5.212644 | 3.379442  | 0.513776  | C           | -2.818665 | -0.782011 | -1.197040 |
| H  | 5.149545  | 0.865654  | 2.003083  | C           | -4.248001 | -0.387415 | -1.450926 |
| H  | 5.092670  | -0.528251 | 4.054414  | C           | -1.553740 | -3.838806 | 2.325804  |
| H  | 2.906331  | -1.120963 | 5.107608  | C           | 3.649066  | -2.426003 | -0.071348 |
| H  | 0.783772  | -0.302596 | 4.075183  | C           | 0.878090  | 1.165454  | -3.793511 |
| H  | 1.791560  | 3.474068  | 1.232100  | H           | 0.731668  | 2.216687  | -3.521508 |
| H  | 1.761800  | 4.593633  | -1.000257 | H           | 0.335699  | 0.916872  | -4.715676 |
| H  | 4.339714  | 1.543173  | -2.580606 | H           | 1.950865  | 1.000811  | -3.977771 |
| H  | 4.346419  | 0.392838  | -0.358143 | H           | 4.016175  | -1.944620 | 0.843489  |
| H  | -1.231501 | 3.229528  | 0.239243  | H           | 4.256359  | -2.091899 | -0.927835 |
| H  | -2.106903 | -0.228763 | 2.572954  | H           | 3.745039  | -3.518230 | -0.004656 |
| H  | -2.148752 | 1.237952  | 3.575842  | H           | -1.006449 | -3.629035 | 3.254680  |
| H  | -3.500075 | 0.042247  | 3.655113  | H           | -2.616816 | -3.606302 | 2.500763  |
| H  | -5.585192 | 4.301863  | 0.050082  | H           | -1.464553 | -4.896142 | 2.047995  |
| H  | -5.665353 | 2.500451  | 0.033353  | H           | -4.251410 | 0.557391  | -2.018354 |
| H  | -5.506208 | 3.326127  | 1.572087  | H           | -4.754962 | -0.198004 | -0.494290 |
| Rh | -0.386413 | -2.266261 | -1.519522 | H           | -4.764267 | -1.160177 | -2.032900 |
| Rh | -0.198588 | -0.451553 | 0.043926  |             |           |           |           |
| O  | 1.554434  | -2.769281 | -1.133446 | <b>TS7e</b> |           |           |           |
| O  | 1.762858  | -1.031009 | 0.275906  | C           | 0.772512  | -2.397788 | -0.970970 |
| O  | 0.323397  | 0.756913  | -1.519947 | C           | 1.793982  | -2.961913 | -0.155150 |
| O  | -0.739463 | -1.760746 | 1.528841  | C           | 1.856550  | -4.358125 | -0.042568 |
| O  | -2.187180 | -0.105896 | -0.325391 | C           | 0.951167  | -5.185608 | -0.708146 |
| O  | -2.324603 | -1.734337 | -1.864670 | C           | -0.059321 | -4.623165 | -1.492818 |
| O  | 0.228274  | -0.962373 | -2.973309 | C           | -0.160416 | -3.238967 | -1.604775 |
| O  | -0.997143 | -3.441580 | 0.050137  | C           | 0.653787  | -0.964451 | -1.142122 |
| C  | -1.050194 | -2.954211 | 1.214267  | C           | 2.778561  | -2.109515 | 0.555526  |
| C  | 2.210378  | -2.052316 | -0.325222 | C           | 2.367435  | -0.975197 | 1.276545  |
| C  | 0.436486  | 0.252462  | -2.679755 | C           | 3.301713  | -0.073140 | 1.785118  |

|    |           |           |           |    |           |           |           |
|----|-----------|-----------|-----------|----|-----------|-----------|-----------|
| C  | 4.655548  | -0.336247 | 1.602764  | Rh | -3.113107 | 0.867302  | 0.812261  |
| C  | 5.099890  | -1.493810 | 0.972198  | O  | -1.126753 | -1.490554 | 1.127247  |
| C  | 4.153370  | -2.373582 | 0.445701  | O  | -2.869073 | -0.589274 | 2.237337  |
| F  | 5.564214  | 0.577465  | 2.009324  | O  | -1.858355 | 2.127967  | 1.845119  |
| C  | 1.399839  | 0.039988  | -1.441139 | O  | -4.244366 | -0.422618 | -0.307634 |
| C  | 1.705163  | 1.387680  | -1.268276 | O  | -3.221751 | 2.273092  | -0.679761 |
| C  | 3.020638  | 1.785741  | -1.210894 | O  | -1.316539 | 1.539721  | -1.633245 |
| C  | 3.913088  | 0.672570  | -1.546953 | O  | -0.037800 | 1.175534  | 0.929675  |
| O  | 3.361174  | -0.408566 | -1.807451 | O  | -2.444210 | -1.128791 | -1.466151 |
| C  | 5.411629  | 0.759351  | -1.625456 | C  | -3.687762 | -1.119327 | -1.200621 |
| O  | 2.393695  | 3.939272  | -0.521821 | C  | -1.960854 | -1.452911 | 2.086308  |
| C  | 3.312680  | 3.161191  | -0.723995 | C  | -0.613378 | 2.032096  | 1.678574  |
| C  | 4.735800  | 3.561640  | -0.395860 | C  | -2.305942 | 2.336985  | -1.544642 |
| H  | 2.624520  | -4.797952 | 0.597697  | C  | -2.351614 | 3.463919  | -2.545200 |
| H  | 1.025473  | -6.270235 | -0.599383 | C  | -4.555037 | -2.038544 | -2.024866 |
| H  | -0.779758 | -5.263823 | -2.006502 | C  | -1.862349 | -2.561040 | 3.104573  |
| H  | -0.964337 | -2.780011 | -2.179068 | C  | 0.294332  | 3.001121  | 2.391285  |
| H  | 1.306542  | -0.774758 | 1.416858  | H  | -0.285628 | 3.692371  | 3.013868  |
| H  | 2.987570  | 0.834844  | 2.301592  | H  | 0.878174  | 3.556613  | 1.640159  |
| H  | 6.170994  | -1.669992 | 0.859743  | H  | 1.007151  | 2.441565  | 3.016244  |
| H  | 4.489067  | -3.247021 | -0.116505 | H  | -2.340594 | -2.262369 | 4.045654  |
| H  | 0.889815  | 2.089197  | -1.097797 | H  | -0.811156 | -2.835813 | 3.264383  |
| H  | 5.720534  | 1.562344  | -2.311053 | H  | -2.384707 | -3.446541 | 2.707747  |
| H  | 5.837335  | 0.980765  | -0.637021 | H  | -4.291459 | -3.082038 | -1.791278 |
| H  | 5.802751  | -0.201632 | -1.979061 | H  | -5.616210 | -1.868419 | -1.807812 |
| H  | 4.723767  | 4.584724  | -0.000485 | H  | -4.350751 | -1.878714 | -3.093555 |
| H  | 5.159634  | 2.880832  | 0.359571  | H  | -3.343324 | 3.932045  | -2.553317 |
| H  | 5.385275  | 3.521216  | -1.282682 | H  | -2.085167 | 3.092578  | -3.544381 |
| Rh | -1.154619 | -0.022056 | -0.309174 | H  | -1.600030 | 4.216988  | -2.257815 |

|              |           |           |           |    |           |           |           |
|--------------|-----------|-----------|-----------|----|-----------|-----------|-----------|
|              |           |           |           | H  | -1.167881 | 0.983615  | 1.564423  |
| <b>VIIIe</b> |           |           |           | H  | -2.648230 | -0.404904 | 3.013678  |
| C            | -0.875706 | 2.160776  | -1.056201 | H  | -6.112872 | 1.538219  | 1.375330  |
| C            | -1.933686 | 2.787359  | -0.335943 | H  | -4.640988 | 2.889975  | -0.137669 |
| C            | -2.123108 | 4.168361  | -0.489699 | H  | -0.943811 | -2.204639 | -0.727457 |
| C            | -1.305486 | 4.927349  | -1.327618 | H  | -5.636760 | -1.211651 | -2.606712 |
| C            | -0.250123 | 4.315094  | -2.009750 | H  | -5.767278 | -0.356207 | -1.049243 |
| C            | -0.021450 | 2.950912  | -1.852560 | H  | -5.217885 | 0.527932  | -2.492065 |
| C            | -0.619437 | 0.721916  | -1.002997 | H  | -5.249974 | -4.660430 | -0.956199 |
| C            | -2.800034 | 2.025539  | 0.596306  | H  | -5.696567 | -2.952293 | -0.625178 |
| C            | -2.249140 | 1.100790  | 1.500836  | H  | -5.330629 | -3.461018 | -2.287717 |
| C            | -3.068496 | 0.327224  | 2.322980  | Rh | 1.133788  | 0.036948  | -0.275150 |
| C            | -4.448437 | 0.495790  | 2.255165  | Rh | 3.191811  | -0.785318 | 0.794555  |
| C            | -5.027084 | 1.426591  | 1.393918  | O  | 0.120213  | -1.069654 | 1.130337  |
| C            | -4.196436 | 2.185226  | 0.568198  | O  | 2.001157  | -1.894150 | 2.056836  |
| F            | -5.242991 | -0.253181 | 3.036244  | O  | 3.145719  | -2.338506 | -0.557321 |
| C            | -1.647930 | -0.186998 | -1.263385 | O  | 3.056209  | 0.833061  | 2.062063  |
| C            | -1.751565 | -1.557599 | -1.042956 | O  | 4.242862  | 0.361380  | -0.544821 |
| C            | -3.097837 | -1.930998 | -1.254299 | O  | 2.361212  | 1.036361  | -1.588729 |
| C            | -3.763624 | -0.760925 | -1.644941 | O  | 1.218021  | -1.619978 | -1.485373 |
| O            | -2.913421 | 0.260825  | -1.670648 | O  | 1.206059  | 1.617369  | 1.034561  |
| C            | -5.175169 | -0.440536 | -1.976777 | C  | 2.131201  | 1.673115  | 1.910494  |
| O            | -2.820604 | -4.162052 | -0.612937 | C  | 0.751918  | -1.814676 | 1.952562  |
| C            | -3.593480 | -3.309318 | -1.005826 | C  | 2.189836  | -2.439061 | -1.369297 |
| C            | -5.059041 | -3.615664 | -1.230850 | C  | 3.625800  | 1.004067  | -1.432953 |
| H            | -2.914377 | 4.657009  | 0.083385  | C  | 4.431772  | 1.824635  | -2.410917 |
| H            | -1.477621 | 6.001725  | -1.427307 | C  | 2.108552  | 2.879204  | 2.817751  |
| H            | 0.407237  | 4.905407  | -2.652327 | C  | -0.108307 | -2.656403 | 2.863258  |
| H            | 0.818202  | 2.464387  | -2.347492 | C  | 2.151930  | -3.639636 | -2.283321 |

|             |           |           |           |    |           |           |           |
|-------------|-----------|-----------|-----------|----|-----------|-----------|-----------|
| H           | 3.093625  | -4.198305 | -2.224722 | C  | 1.936360  | 1.710007  | -0.598759 |
| H           | 1.955785  | -3.317132 | -3.315896 | C  | 3.261489  | 2.205862  | -0.836827 |
| H           | 1.318458  | -4.292267 | -1.977992 | C  | 4.072465  | 1.089844  | -0.976361 |
| H           | 0.510507  | -3.339238 | 3.457201  | O  | 3.321832  | -0.023852 | -0.846260 |
| H           | -0.835887 | -3.220612 | 2.260493  | C  | 5.520474  | 0.869142  | -1.246234 |
| H           | -0.677495 | -1.996018 | 3.536079  | O  | 2.698579  | 4.478439  | -0.780566 |
| H           | 1.074928  | 3.117356  | 3.104059  | C  | 3.578849  | 3.647000  | -0.914964 |
| H           | 2.731772  | 2.705710  | 3.703525  | C  | 5.015864  | 4.065115  | -1.166727 |
| H           | 2.507169  | 3.743420  | 2.262454  | H  | 2.853340  | -4.962701 | -0.857407 |
| H           | 5.505514  | 1.687478  | -2.236661 | H  | 1.987417  | -5.230746 | -3.183262 |
| H           | 4.166267  | 2.886883  | -2.295487 | H  | 0.672609  | -3.407757 | -4.241948 |
| H           | 4.171717  | 1.530789  | -3.438704 | H  | 0.131875  | -1.326371 | -2.983090 |
|             |           |           |           | H  | 0.548266  | -1.749890 | 1.345940  |
| <b>TS8e</b> |           |           |           | H  | 1.516193  | 0.179908  | 2.597694  |
| C           | 1.207126  | -1.950009 | -1.218372 | H  | 4.961764  | -2.383603 | 2.943368  |
| C           | 1.973834  | -2.987993 | -0.626802 | H  | 4.208385  | -3.761453 | 0.995785  |
| C           | 2.265616  | -4.170186 | -1.326892 | H  | 1.049961  | 2.308311  | -0.441062 |
| C           | 1.781340  | -4.316826 | -2.621835 | H  | 5.810703  | 1.235586  | -2.244355 |
| C           | 1.025973  | -3.286945 | -3.214807 | H  | 6.155645  | 1.385650  | -0.510589 |
| C           | 0.723824  | -2.114993 | -2.522989 | H  | 5.735974  | -0.206813 | -1.199810 |
| C           | 1.035515  | -0.729257 | -0.381524 | H  | 5.066073  | 5.160527  | -1.204810 |
| C           | 2.421785  | -2.564703 | 0.680302  | H  | 5.676776  | 3.695389  | -0.366403 |
| C           | 1.615328  | -1.470571 | 1.165273  | H  | 5.386669  | 3.646462  | -2.115794 |
| C           | 2.107503  | -0.668714 | 2.251326  | Rh | -0.960661 | -0.054718 | -0.102968 |
| C           | 3.294798  | -1.018860 | 2.837926  | Rh | -3.240717 | 0.711178  | 0.426004  |
| C           | 4.029244  | -2.156225 | 2.421818  | O  | -1.241330 | -1.539680 | 1.289924  |
| C           | 3.597152  | -2.930255 | 1.352772  | O  | -3.319640 | -0.842581 | 1.793759  |
| F           | 3.787863  | -0.305751 | 3.859421  | O  | -2.392698 | 1.938046  | 1.850085  |
| C           | 1.997780  | 0.345023  | -0.619953 | O  | -3.912459 | -0.560519 | -1.041389 |

|            |           |           |           |   |           |           |           |
|------------|-----------|-----------|-----------|---|-----------|-----------|-----------|
| O          | -2.956964 | 2.195488  | -0.965558 | C | -0.425103 | -1.658595 | 3.977418  |
| O          | -0.879508 | 1.470500  | -1.467447 | C | 0.770251  | -2.360212 | 3.600788  |
| O          | -0.309909 | 1.194506  | 1.406641  | C | 1.681029  | -1.814977 | 2.733760  |
| O          | -1.821184 | -1.250164 | -1.537125 | C | 2.207648  | 0.308747  | 1.367648  |
| C          | -3.082808 | -1.243601 | -1.699138 | C | 0.146322  | 1.412377  | 1.874686  |
| C          | -2.343206 | -1.613766 | 1.940521  | C | 1.409128  | 1.546963  | 1.053728  |
| C          | -1.148688 | 1.926150  | 2.030475  | C | 1.943432  | 2.943316  | 0.962960  |
| C          | -1.863922 | 2.270161  | -1.588078 | C | 1.105048  | 3.962325  | 1.242951  |
| C          | -1.669228 | 3.408667  | -2.559943 | C | -0.227560 | 3.795266  | 1.777449  |
| C          | -3.619302 | -2.115610 | -2.810348 | C | -0.677918 | 2.553357  | 2.119071  |
| C          | -2.441784 | -2.730498 | 2.950230  | F | 1.503254  | 5.234494  | 1.060640  |
| C          | -0.568076 | 2.845680  | 3.078844  | C | 3.418115  | -0.003833 | 0.683199  |
| H          | -1.343045 | 3.505453  | 3.486615  | C | 4.157912  | 0.664652  | -0.267766 |
| H          | 0.245838  | 3.438261  | 2.635322  | C | 5.242568  | -0.193486 | -0.640433 |
| H          | -0.132956 | 2.243463  | 3.892201  | C | 5.106450  | -1.343865 | 0.119661  |
| H          | -3.411329 | -2.703128 | 3.461156  | O | 4.012936  | -1.229415 | 0.907730  |
| H          | -1.626357 | -2.635573 | 3.683614  | C | 5.874358  | -2.612360 | 0.252159  |
| H          | -2.312329 | -3.696412 | 2.438594  | O | 6.176984  | 1.249313  | -2.227928 |
| H          | -2.961049 | -2.978866 | -2.973576 | C | 6.253692  | 0.177365  | -1.656663 |
| H          | -4.642801 | -2.438577 | -2.580054 | C | 7.370789  | -0.799998 | -1.965726 |
| H          | -3.647815 | -1.521290 | -3.738267 | H | -1.648037 | 0.087846  | 3.716774  |
| H          | -2.572383 | 4.027612  | -2.618404 | H | -1.113335 | -2.131176 | 4.682131  |
| H          | -1.418429 | 3.006050  | -3.552725 | H | 0.953503  | -3.350111 | 4.026007  |
| H          | -0.813304 | 4.018278  | -2.230296 | H | 2.589527  | -2.349350 | 2.461644  |
|            |           |           |           | H | 1.103927  | 1.311483  | 0.007064  |
| <b>IXe</b> |           |           |           | H | 2.937789  | 3.145380  | 0.565557  |
| C          | 1.439828  | -0.507222 | 2.202779  | H | -0.824386 | 4.693073  | 1.945727  |
| C          | 0.186996  | 0.167344  | 2.532345  | H | -1.648557 | 2.421567  | 2.599384  |
| C          | -0.721382 | -0.427065 | 3.458932  | H | 3.970556  | 1.644710  | -0.694021 |



|    |           |           |           |             |           |           |           |
|----|-----------|-----------|-----------|-------------|-----------|-----------|-----------|
| H  | 5.949486  | -3.144944 | -0.708518 | H           | -0.438058 | 3.705661  | -2.409650 |
| H  | 6.901275  | -2.432385 | 0.608113  | H           | -5.289158 | 1.807891  | 1.659675  |
| H  | 5.370768  | -3.269946 | 0.973192  | H           | -6.224110 | 1.187753  | 0.240691  |
| H  | 8.028057  | -0.359358 | -2.725664 | H           | -5.850605 | 0.116763  | 1.615359  |
| H  | 7.955573  | -1.028432 | -1.060599 | H           | -2.718910 | -4.804192 | 0.320435  |
| H  | 6.964306  | -1.752769 | -2.341053 | H           | -3.335173 | -3.932345 | 1.754279  |
| Rh | -1.343659 | 0.043389  | 0.182733  | H           | -1.594319 | -4.274361 | 1.636626  |
| Rh | -2.583390 | -0.738306 | -1.724383 |             |           |           |           |
| O  | -1.093911 | 1.815066  | -0.828624 | <b>TS9e</b> |           |           |           |
| O  | -2.308554 | 1.100851  | -2.583454 | C           | -0.490628 | 2.360887  | 1.640880  |
| O  | -0.807632 | -1.373383 | -2.542475 | C           | -1.784628 | 2.861470  | 1.284224  |
| O  | -4.272398 | -0.050788 | -0.786941 | C           | -2.765971 | 3.047027  | 2.276698  |
| O  | -2.789435 | -2.545360 | -0.788661 | C           | -2.452261 | 2.758788  | 3.596313  |
| O  | -1.662163 | -1.805161 | 1.014592  | C           | -1.172485 | 2.268093  | 3.947566  |
| O  | 0.340568  | -0.665820 | -0.741595 | C           | -0.196746 | 2.057760  | 2.986789  |
| O  | -3.109205 | 0.705868  | 0.990506  | C           | 0.302819  | 2.186695  | 0.446140  |
| C  | -4.184890 | 0.508495  | 0.344143  | C           | -1.843367 | 3.040734  | -0.138604 |
| C  | -1.624592 | 1.970246  | -1.971781 | C           | -0.579697 | 2.596400  | -0.698621 |
| C  | 0.259805  | -1.208369 | -1.888034 | C           | -0.294457 | 2.842604  | -2.078539 |
| C  | -2.293726 | -2.692009 | 0.366679  | C           | -1.324818 | 3.322396  | -2.856030 |
| C  | -2.489607 | -4.020592 | 1.053162  | C           | -2.599431 | 3.651827  | -2.347895 |
| C  | -5.469511 | 0.948641  | 1.000853  | C           | -2.848750 | 3.519316  | -0.987615 |
| C  | -1.441943 | 3.315908  | -2.625694 | F           | -1.110981 | 3.508619  | -4.168603 |
| C  | 1.552310  | -1.710354 | -2.480200 | C           | 1.707927  | 1.910618  | 0.337952  |
| H  | 1.813146  | -2.662475 | -1.990634 | C           | 2.527541  | 1.583274  | -0.713049 |
| H  | 2.361401  | -0.996526 | -2.269450 | C           | 3.796657  | 1.225943  | -0.155299 |
| H  | 1.446553  | -1.879198 | -3.558739 | C           | 3.681746  | 1.397296  | 1.215627  |
| H  | -2.173517 | 4.017058  | -2.192622 | O           | 2.429133  | 1.804897  | 1.507232  |
| H  | -1.614035 | 3.247461  | -3.706867 | C           | 4.597755  | 1.227789  | 2.376238  |

|    |           |           |           |           |           |           |           |
|----|-----------|-----------|-----------|-----------|-----------|-----------|-----------|
| O  | 4.733993  | 0.415818  | -2.142127 | C         | -2.744921 | -1.266477 | -1.594095 |
| C  | 4.905846  | 0.682370  | -0.963935 | C         | 0.952524  | -1.596214 | -2.244108 |
| C  | 6.246287  | 0.439346  | -0.298670 | C         | 1.550172  | -2.020394 | 1.338808  |
| H  | -3.758925 | 3.415023  | 2.008626  | C         | 2.832016  | -2.221549 | 2.108043  |
| H  | -3.202060 | 2.907702  | 4.377186  | C         | -2.937599 | -1.645348 | 3.289678  |
| H  | -0.955634 | 2.044064  | 4.994798  | C         | -3.997725 | -1.042944 | -2.401660 |
| H  | 0.779365  | 1.657158  | 3.253101  | C         | 1.900975  | -1.546595 | -3.412412 |
| H  | -0.652917 | 1.306441  | -0.574609 | H         | 2.123107  | -2.556565 | -3.776636 |
| H  | 0.663138  | 2.603098  | -2.533756 | H         | 2.825544  | -1.031520 | -3.105997 |
| H  | -3.356629 | 4.024643  | -3.038910 | H         | 1.447719  | -0.949221 | -4.218412 |
| H  | -3.816633 | 3.816958  | -0.578323 | H         | -4.074822 | -1.796459 | -3.196455 |
| H  | 2.265082  | 1.498549  | -1.759432 | H         | -4.008981 | -0.027430 | -2.817112 |
| H  | 4.886307  | 0.173253  | 2.514026  | H         | -4.867722 | -1.160462 | -1.735398 |
| H  | 5.524133  | 1.809539  | 2.256874  | H         | -3.231830 | -0.623636 | 3.559890  |
| H  | 4.091195  | 1.564906  | 3.290468  | H         | -3.818137 | -2.287714 | 3.151430  |
| H  | 6.959793  | 0.084270  | -1.052651 | H         | -2.336064 | -2.074903 | 4.106766  |
| H  | 6.627630  | 1.359060  | 0.172196  | H         | 2.917068  | -3.256855 | 2.459108  |
| H  | 6.151725  | -0.318393 | 0.495907  | H         | 2.875565  | -1.518331 | 2.951191  |
| Rh | -0.464819 | -0.430670 | 0.000533  | H         | 3.676359  | -1.995697 | 1.437156  |
| Rh | -0.734786 | -2.811841 | -0.234528 |           |           |           |           |
| O  | -2.181887 | -0.235242 | -1.112608 | <b>6e</b> |           |           |           |
| O  | -2.358268 | -2.458744 | -1.427790 | C         | -1.233436 | -1.541361 | -0.594003 |
| O  | 0.520116  | -2.720534 | -1.858582 | C         | -2.451860 | -1.217381 | 0.038569  |
| O  | -1.943451 | -2.736208 | 1.427473  | C         | -3.282253 | -2.230484 | 0.525401  |
| O  | 0.918081  | -3.045646 | 0.959377  | C         | -2.878472 | -3.561925 | 0.379412  |
| O  | 1.213105  | -0.818732 | 1.107135  | C         | -1.663106 | -3.878205 | -0.241324 |
| O  | 0.655795  | -0.478686 | -1.712272 | C         | -0.830337 | -2.863797 | -0.733356 |
| O  | -1.603861 | -0.522442 | 1.687094  | C         | -0.521101 | -0.272226 | -1.050746 |
| C  | -2.104507 | -1.635766 | 2.033355  | C         | -2.592824 | 0.245321  | 0.065420  |

|   |           |           |           |              |           |           |           |
|---|-----------|-----------|-----------|--------------|-----------|-----------|-----------|
| C | -1.460825 | 0.819139  | -0.550808 | H            | 5.429783  | -0.623248 | 1.347720  |
| C | -1.309427 | 2.197011  | -0.643403 |              |           |           |           |
| C | -2.325256 | 2.994033  | -0.111922 | <b>TS11e</b> |           |           |           |
| C | -3.460667 | 2.454059  | 0.495219  | C            | -0.269106 | 2.685077  | -1.373355 |
| C | -3.597287 | 1.066001  | 0.586627  | C            | -0.248816 | 3.557310  | -0.263562 |
| F | -2.205417 | 4.328433  | -0.185961 | C            | 0.530711  | 4.693887  | -0.218158 |
| C | 0.886036  | -0.142464 | -0.574962 | C            | 1.359575  | 4.914834  | -1.340958 |
| C | 2.086880  | -0.022203 | -1.202727 | C            | 1.341913  | 4.051678  | -2.448098 |
| C | 3.089597  | 0.060828  | -0.168502 | C            | 0.512367  | 2.917998  | -2.502603 |
| C | 2.408382  | -0.016255 | 1.032102  | C            | -1.200704 | 1.754716  | -0.739586 |
| O | 1.082207  | -0.138721 | 0.782771  | C            | -1.357959 | 2.788024  | 0.463002  |
| C | 2.796219  | 0.005419  | 2.470231  | C            | -1.335943 | 2.338747  | 1.875902  |
| O | 4.933925  | 0.246834  | -1.598128 | C            | -2.479641 | 1.884918  | 2.442404  |
| C | 4.533991  | 0.199158  | -0.448696 | C            | -3.720989 | 1.979776  | 1.723038  |
| C | 5.497895  | 0.279514  | 0.720064  | C            | -3.852019 | 2.720128  | 0.563778  |
| H | -4.228733 | -1.990445 | 1.015597  | C            | -2.695197 | 3.216493  | -0.038190 |
| H | -3.516482 | -4.364513 | 0.757121  | F            | -4.800079 | 1.441814  | 2.302676  |
| H | -1.362113 | -4.923615 | -0.341643 | C            | -1.907379 | 0.567186  | -1.013348 |
| H | 0.121355  | -3.106934 | -1.212777 | C            | -2.612670 | -0.295632 | -0.182791 |
| H | -0.481154 | -0.245887 | -2.153595 | C            | -3.125624 | -1.337882 | -1.014026 |
| H | -0.434869 | 2.660623  | -1.103768 | C            | -2.697636 | -1.057437 | -2.303703 |
| H | -4.219204 | 3.131382  | 0.891175  | O            | -2.004394 | 0.101201  | -2.314577 |
| H | -4.479909 | 0.636054  | 1.065230  | C            | -2.795294 | -1.803704 | -3.577209 |
| H | 2.281678  | 0.007818  | -2.271276 | O            | -4.067199 | -3.491264 | -1.308235 |
| H | 3.474217  | -0.824629 | 2.723104  | C            | -3.812402 | -2.559692 | -0.559662 |
| H | 3.307196  | 0.942383  | 2.741518  | C            | -4.146849 | -2.621215 | 0.918612  |
| H | 1.892467  | -0.086463 | 3.087354  | H            | 0.539718  | 5.377097  | 0.634288  |
| H | 6.519176  | 0.379243  | 0.331624  | H            | 2.030753  | 5.777138  | -1.350885 |
| H | 5.263393  | 1.142350  | 1.363552  | H            | 1.996892  | 4.271875  | -3.295314 |

|    |           |           |           |           |           |           |           |
|----|-----------|-----------|-----------|-----------|-----------|-----------|-----------|
| H  | 0.513867  | 2.247851  | -3.361709 | C         | -0.121733 | -4.210279 | -1.406551 |
| H  | -0.380075 | 2.299780  | 2.394939  | H         | 0.230789  | -4.249648 | -2.450234 |
| H  | -2.500807 | 1.455743  | 3.446045  | H         | -1.217536 | -4.134248 | -1.419948 |
| H  | -4.843686 | 2.891410  | 0.141496  | H         | 0.204226  | -5.127213 | -0.899391 |
| H  | -2.736605 | 3.846607  | -0.925062 | H         | -1.091529 | -1.033607 | 4.191246  |
| H  | -2.602737 | -0.262949 | 0.897491  | H         | 0.350759  | -1.995969 | 4.708041  |
| H  | -3.486291 | -2.644751 | -3.452691 | H         | -0.933035 | -2.745890 | 3.725181  |
| H  | -3.126243 | -1.146539 | -4.397182 | H         | 2.708521  | 2.759964  | 2.980350  |
| H  | -1.801987 | -2.200703 | -3.851028 | H         | 4.287509  | 2.397853  | 2.215834  |
| H  | -4.723367 | -3.531017 | 1.127191  | H         | 3.040998  | 3.384326  | 1.350934  |
| H  | -3.212111 | -2.634070 | 1.504114  | H         | 4.378515  | -0.434608 | -3.292811 |
| H  | -4.709462 | -1.729070 | 1.236134  | H         | 3.570722  | 1.172653  | -3.218089 |
| Rh | 0.574720  | -0.202856 | 0.015501  | H         | 2.761671  | -0.170454 | -4.045742 |
| Rh | 2.478357  | -1.492736 | 0.693210  |           |           |           |           |
| O  | -0.314052 | -0.726525 | 1.797499  | <b>Xe</b> |           |           |           |
| O  | 1.514146  | -1.859882 | 2.464855  | C         | -2.124363 | -0.898493 | -0.495395 |
| O  | 1.578744  | -3.142712 | -0.123975 | C         | -2.898466 | -0.067508 | 0.329184  |
| O  | 3.290118  | 0.221920  | 1.467603  | C         | -4.156678 | -0.428204 | 0.773258  |
| O  | 3.345220  | -1.049019 | -1.104850 | C         | -4.616913 | -1.698838 | 0.357993  |
| O  | 1.580979  | 0.210185  | -1.714898 | C         | -3.840744 | -2.530650 | -0.454472 |
| O  | -0.139667 | -1.903184 | -0.877146 | C         | -2.557816 | -2.144904 | -0.905429 |
| O  | 1.444826  | 1.401171  | 0.949793  | C         | -0.958461 | 0.061111  | -0.592792 |
| C  | 2.612384  | 1.289345  | 1.434078  | C         | -1.865671 | 1.026547  | 0.378802  |
| C  | 0.336742  | -1.430369 | 2.630032  | C         | -1.455931 | 1.409480  | -1.068167 |
| C  | 0.484145  | -2.998886 | -0.744732 | C         | -0.547495 | 2.569235  | -1.158960 |
| C  | 2.732048  | -0.286192 | -1.907595 | C         | -0.031507 | 3.125939  | -0.041846 |
| C  | 3.416514  | 0.082761  | -3.198891 | C         | -0.395319 | 2.737766  | 1.298738  |
| C  | 3.215985  | 2.536296  | 2.028267  | C         | -1.341987 | 1.778767  | 1.488956  |
| C  | -0.373590 | -1.813118 | 3.904263  | F         | 0.824283  | 4.154816  | -0.139491 |

|              |           |           |           |   |           |           |           |
|--------------|-----------|-----------|-----------|---|-----------|-----------|-----------|
| C            | 0.425654  | -0.317159 | -0.389540 | C | -4.633700 | -1.762759 | 0.085297  |
| C            | 1.645720  | 0.299948  | -0.460849 | C | -3.864003 | -2.450785 | -0.861893 |
| C            | 2.630444  | -0.681833 | -0.090905 | C | -2.579345 | -2.004217 | -1.242950 |
| C            | 1.936589  | -1.844120 | 0.190858  | C | -0.981189 | 0.145945  | -0.530129 |
| O            | 0.612781  | -1.621814 | 0.016908  | C | -1.838919 | 0.854263  | 0.545033  |
| C            | 2.309565  | -3.222213 | 0.616345  | C | -1.341491 | 1.448280  | -1.148085 |
| O            | 4.496409  | 0.711851  | -0.338940 | C | -0.541420 | 2.620419  | -1.046973 |
| C            | 4.080372  | -0.395533 | -0.050433 | C | 0.046928  | 3.017550  | 0.132891  |
| C            | 5.030764  | -1.506637 | 0.356020  | C | -0.354436 | 2.586049  | 1.419139  |
| H            | -4.761014 | 0.203862  | 1.427875  | C | -1.379014 | 1.675843  | 1.591407  |
| H            | -5.598940 | -2.045416 | 0.689005  | F | 0.889145  | 4.066364  | 0.098272  |
| H            | -4.234098 | -3.509291 | -0.740522 | C | 0.411772  | -0.268682 | -0.324494 |
| H            | -1.946276 | -2.813614 | -1.514051 | C | 1.612880  | 0.090612  | -0.855538 |
| H            | -2.237221 | 1.364473  | -1.837055 | C | 2.611619  | -0.725176 | -0.213879 |
| H            | -0.333051 | 3.013671  | -2.131949 | C | 1.932108  | -1.532915 | 0.680739  |
| H            | 0.048910  | 3.287923  | 2.129368  | O | 0.609583  | -1.255737 | 0.612911  |
| H            | -1.706340 | 1.544353  | 2.491482  | C | 2.322474  | -2.590180 | 1.654987  |
| H            | 1.865389  | 1.325090  | -0.733614 | O | 4.453365  | 0.150123  | -1.365428 |
| H            | 2.957032  | -3.719301 | -0.123345 | C | 4.054249  | -0.633158 | -0.522945 |
| H            | 2.849017  | -3.221452 | 1.576286  | C | 5.018392  | -1.531756 | 0.229149  |
| H            | 1.396950  | -3.821741 | 0.734819  | H | -4.777858 | -0.070387 | 1.458970  |
| H            | 6.058201  | -1.122680 | 0.327287  | H | -5.620017 | -2.153509 | 0.347761  |
| H            | 4.801582  | -1.866828 | 1.371603  | H | -4.270148 | -3.358463 | -1.315033 |
| H            | 4.941236  | -2.368897 | -0.323703 | H | -1.983740 | -2.553024 | -1.975654 |
|              |           |           |           | H | -2.115853 | 1.418290  | -1.920751 |
|              |           |           |           | H | -0.487505 | 3.306360  | -1.896135 |
| <b>TS12e</b> |           |           |           | H | 0.043908  | 3.142201  | 2.270012  |
| C            | -2.135586 | -0.857050 | -0.615179 | H | -1.877484 | 1.603956  | 2.561601  |
| C            | -2.900470 | -0.169987 | 0.344679  | H | 1.808088  | 0.851738  | -1.604233 |
| C            | -4.170039 | -0.588723 | 0.714220  |   |           |           |           |

|           |           |           |           |   |           |           |           |
|-----------|-----------|-----------|-----------|---|-----------|-----------|-----------|
| H         | 2.836519  | -3.430635 | 1.163227  | C | 4.011998  | -0.666499 | -0.406112 |
| H         | 2.999286  | -2.199924 | 2.431264  | C | 4.903323  | -1.672442 | 0.298805  |
| H         | 1.419895  | -2.976762 | 2.147002  | H | -4.357970 | -0.835433 | 1.879082  |
| H         | 6.038654  | -1.326951 | -0.118672 | H | -5.167671 | -2.706251 | 0.428491  |
| H         | 4.956733  | -1.353182 | 1.314414  | H | -4.036110 | -3.286071 | -1.675238 |
| H         | 4.778772  | -2.593510 | 0.059056  | H | -2.005131 | -2.034509 | -2.455386 |
|           |           |           |           | H | -1.378100 | 1.390571  | -2.496143 |
| <b>8e</b> |           |           |           | H | -0.454518 | 3.542392  | -1.880696 |
| C         | -2.079255 | -0.726582 | -0.711900 | H | -0.259448 | 3.352119  | 2.277330  |
| C         | -2.722815 | -0.385963 | 0.493719  | H | -2.143671 | 1.758354  | 2.566248  |
| C         | -3.845943 | -1.077070 | 0.945296  | H | 1.876537  | 1.008615  | -1.439761 |
| C         | -4.291720 | -2.127204 | 0.125350  | H | 2.583636  | -3.557260 | 0.957329  |
| C         | -3.644596 | -2.460234 | -1.076056 | H | 2.778554  | -2.453050 | 2.332945  |
| C         | -2.506315 | -1.760231 | -1.524342 | H | 1.166312  | -3.106484 | 1.940873  |
| C         | -1.002240 | 0.369958  | -0.539077 | H | 5.945203  | -1.487508 | 0.008651  |
| C         | -1.787479 | 0.714675  | 0.762573  | H | 4.805188  | -1.584881 | 1.392559  |
| C         | -1.007437 | 1.542554  | -1.478560 | H | 4.623745  | -2.702925 | 0.027695  |
| C         | -0.535086 | 2.756595  | -1.122557 |   |           |           |           |
| C         | -0.140497 | 3.178238  | 0.206240  |   |           |           |           |
| C         | -0.592689 | 2.759970  | 1.420736  |   |           |           |           |
| C         | -1.555863 | 1.709994  | 1.644126  |   |           |           |           |
| F         | 0.686880  | 4.244625  | 0.192107  |   |           |           |           |
| C         | 0.382414  | -0.156479 | -0.321692 |   |           |           |           |
| C         | 1.618890  | 0.195855  | -0.768790 |   |           |           |           |
| C         | 2.555096  | -0.719396 | -0.164650 |   |           |           |           |
| C         | 1.804358  | -1.574297 | 0.621563  |   |           |           |           |
| O         | 0.497556  | -1.233768 | 0.522400  |   |           |           |           |
| C         | 2.104325  | -2.733045 | 1.508581  |   |           |           |           |
| O         | 4.481283  | 0.170059  | -1.156457 |   |           |           |           |

## 18. Reference.

1. a) D. M. T. Chan, K. L. Monaco, R.-P. Wang, M. P. Winters, *Tetrahedron Lett.*, **1998**, 39, 2933; b) J. W. Lockner, D. D. Dixon, R. Risgaard, P. S. Baran, *Org. Lett.*, **2011**, 13, 5628.
2. a) D. Zhu, J. Ma, K. Luo, H. Fu, L. Zhang, S. Zhu, *Angew. Chem. Int. Ed.*, **2016**, 55, 8452; b) D. Zhu, L. Chen, H. Zhang, Z. Ma, H. Jiang, S. Zhu, *Angew. Chem. Int. Ed.*, **2018**, 57, 12405.
3. G. Shi, D. Chen, H. Jiang, Y. Zhang, Y. Zhang, *Org. Lett.*, **2016**, 18, 2958.
4. Z. Liu, H. Tan, L. Wang, T. Fu, Y. Xia, Y. Zhang, J. Wang, *Angew. Chem. Int. Ed.*, **2015**, 54, 3056.
5. C. Soldi, K. N. Lamb, R. A. Squitieri, M. G.-Lopez, M. J. D. Maso, J. T. Shaw, *J. Am. Chem. Soc.*, **2014**, 136, 15142.
6. T. Fujita, I. Takahashi, M. Hayashi, J. Wang, K. Fuchibe, J. Ichikawa, *Eur. J. Org. Chem.*, **2017**, 262.
7. Gaussian 16, Revision C.01, M. J. Frisch, G. W. Trucks, H. B. Schlegel, G. E. Scuseria, M. A. Robb, J. R. Cheeseman, G. Scalmani, V. Barone, G. A. Petersson, H. Nakatsuji, X. Li, M. Caricato, A. V. Marenich, J. Bloino, B. G. Janesko, R. Gomperts, B. Mennucci, H. P. Hratchian, J. V. Ortiz, A. F. Izmaylov, J. L. Sonnenberg, D. Williams-Young, F. Ding, F. Lipparini, F. Egidi, J. Goings, B. Peng, A. Petrone, T. Henderson, D. Ranasinghe, V. G. Zakrzewski, J. Gao, N. Rega, G. Zheng, W. Liang, M. Hada, M. Ehara, K. Toyota, R. Fukuda, J. Hasegawa, M. Ishida, T. Nakajima, Y. Honda, O. Kitao, H. Nakai, T. Vreven, K. Throssell, J. A. Montgomery, Jr., J. E. Peralta, F. Ogliaro, M. J. Bearpark, J. J. Heyd, E. N. Brothers, K. N. Kudin, V. N. Staroverov, T. A. Keith, R. Kobayashi, J. Normand, K. Raghavachari, A. P. Rendell, J. C. Burant, S. S. Iyengar, J. Tomasi, M. Cossi, J. M. Millam, M. Klene, C. Adamo, R. Cammi, J. W. Ochterski, R. L. Martin, K. Morokuma, O. Farkas, J. B. Foresman, and D. J. Fox, Gaussian, Inc., Wallingford CT, 2016.
8. (a) A. D. Becke, *J. Chem. Phys.*, **1993**, 98, 5648-5652; (b) C. Lee, W. Yang, R. G. Parr, *Phys. Rev. B*, **1988**, 37, 785-789.
9. (a) F. Weigend and R. Ahlrichs, *Phys. Chem. Chem. Phys.*, **2005**, 7, 3297-3305. (b) F. Weigend, *Phys. Chem. Chem. Phys.*, **2006**, 8, 1057-1065.
10. S. Grimme, S. Ehrlich, L. Goerigk, *J. Comp. Chem.*, **2011**, 32, 1456-1465.
11. Y. Zhao and D. G. Truhlar, *Theor. Chem. Acc.*, **2008**, 120, 215-241.
12. A. V. Marenich, C. J. Cramer, D. G. Truhlar, *J. Phys. Chem. B*, **2009**, 113, 6378-6396.
13. G. Luchini, J. V. Alegre-Requena, I. Funes-Ardoiz, R. S. Paton, *F1000Research*, **2020**, 9, 291.
14. CYLview20, C. Y. Legault, Université de Sherbrooke, 2020 (<http://www.cylview.org>).

## 19. Spectra of NMR

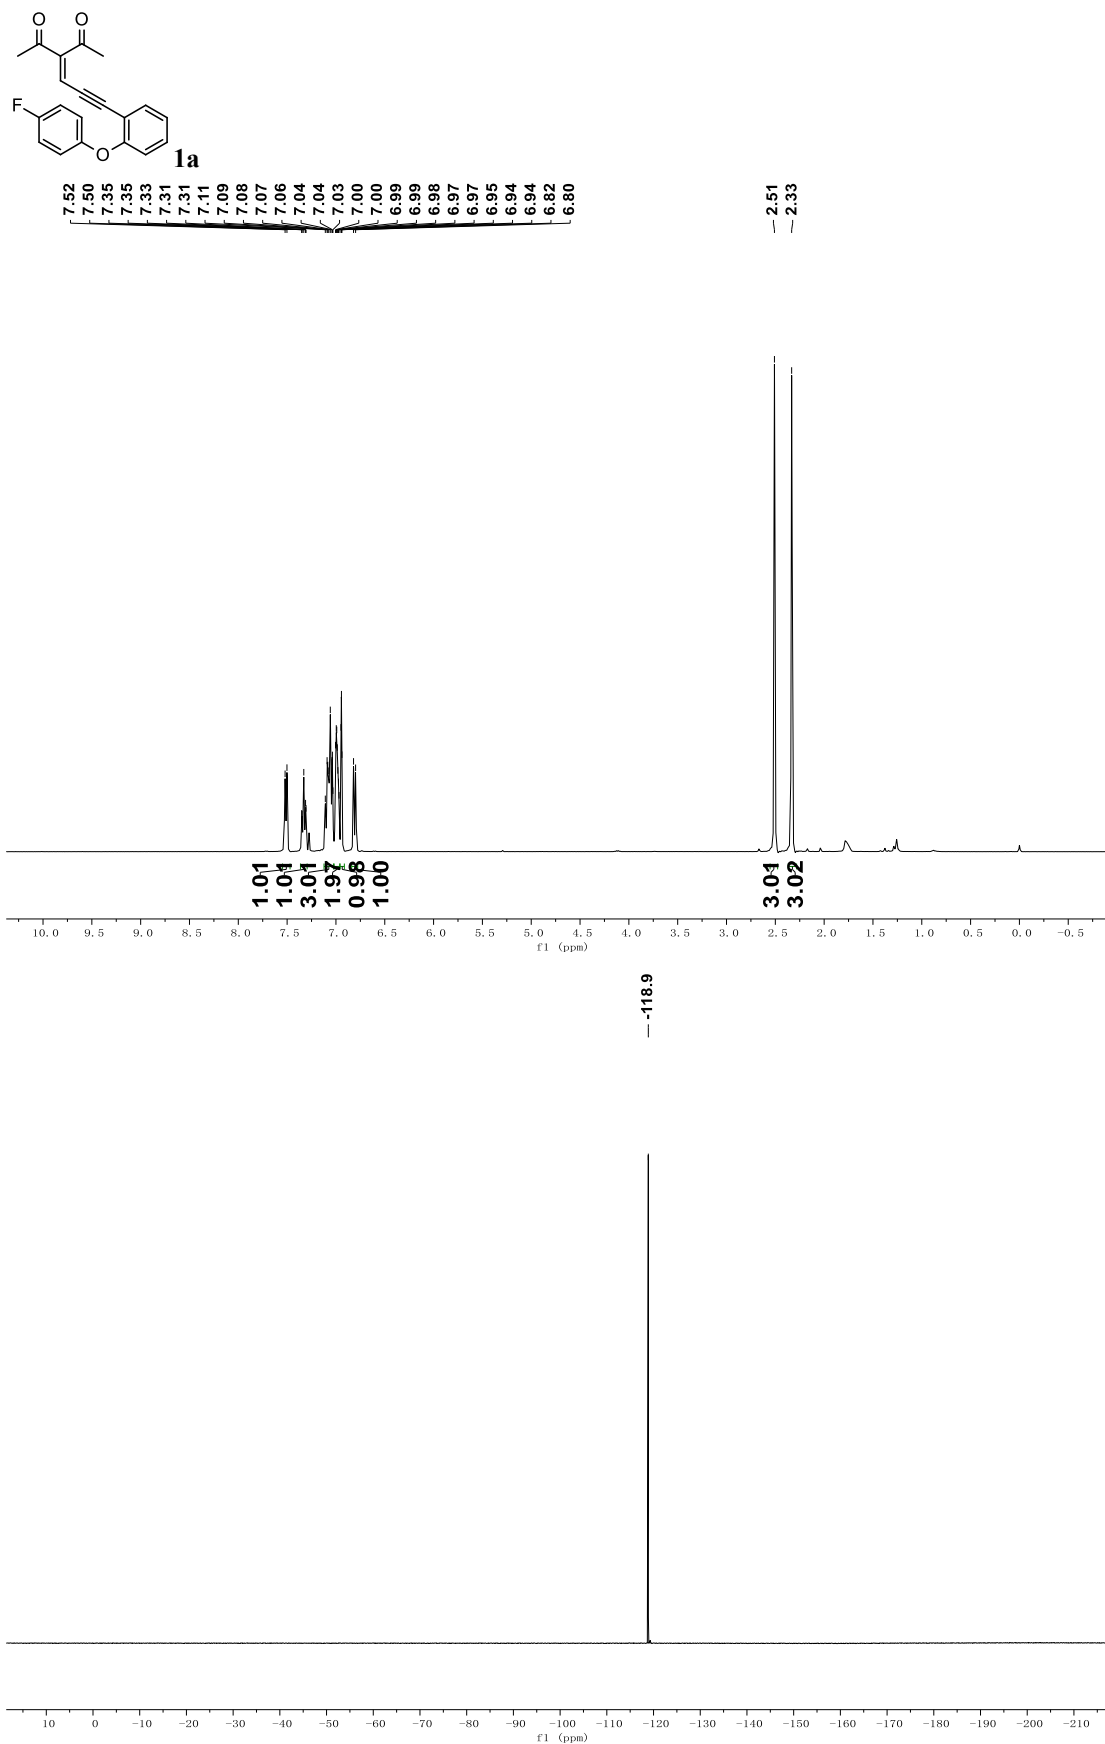



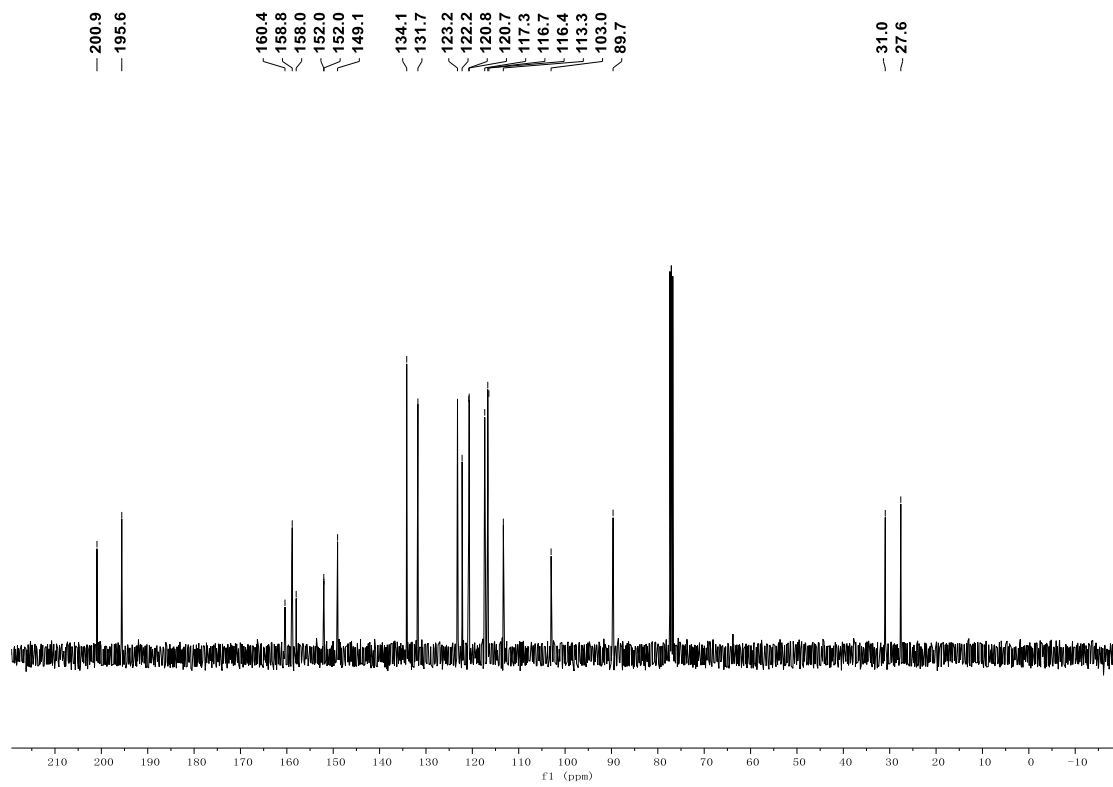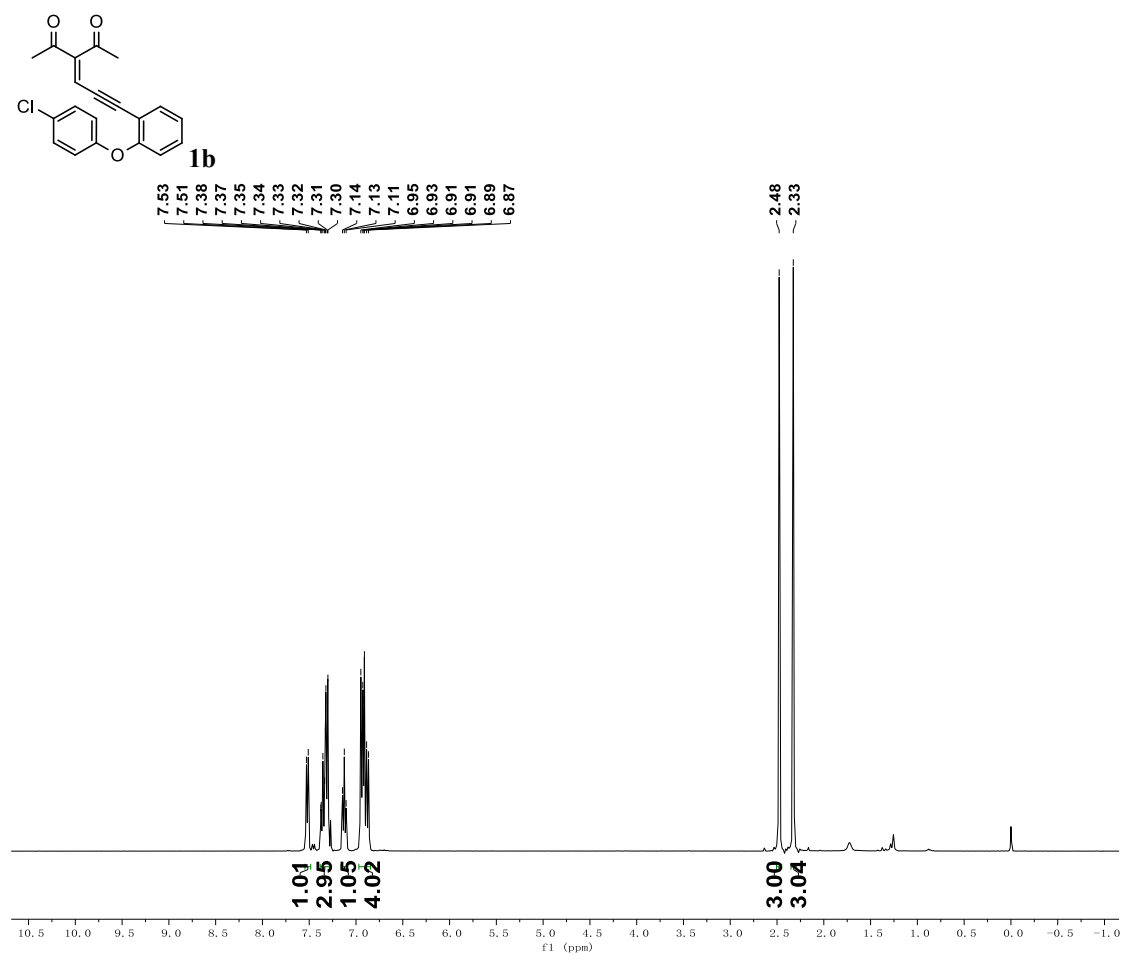

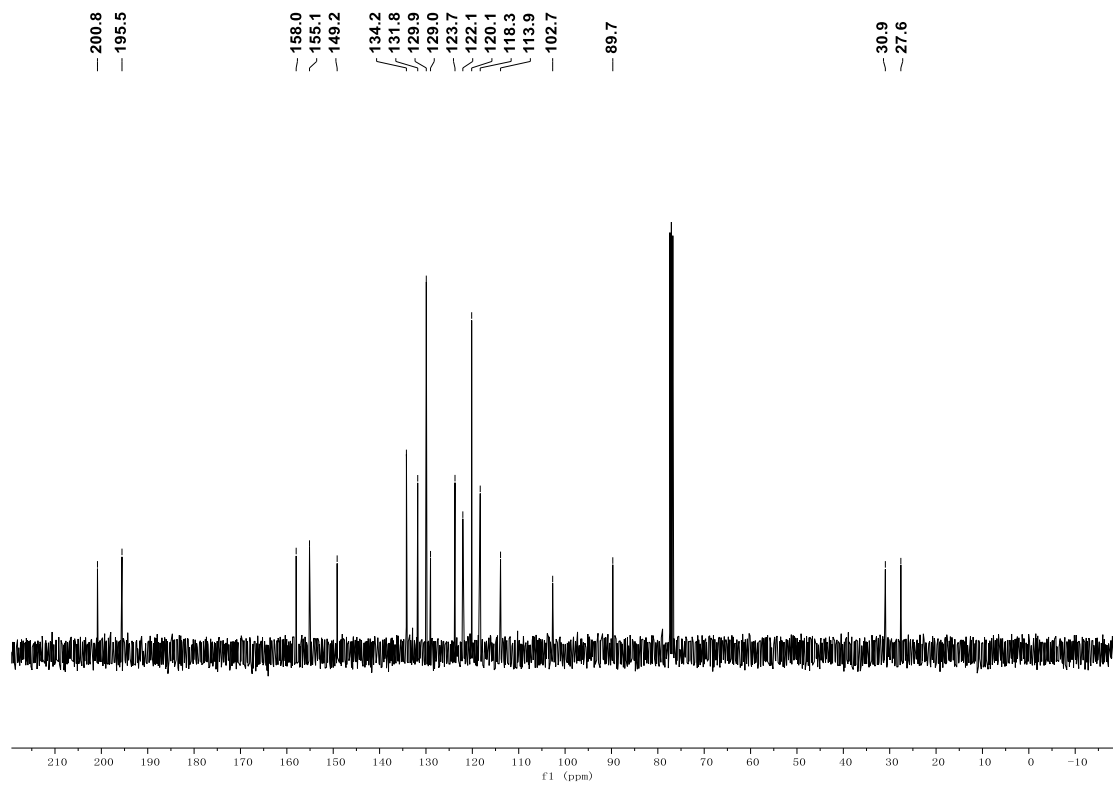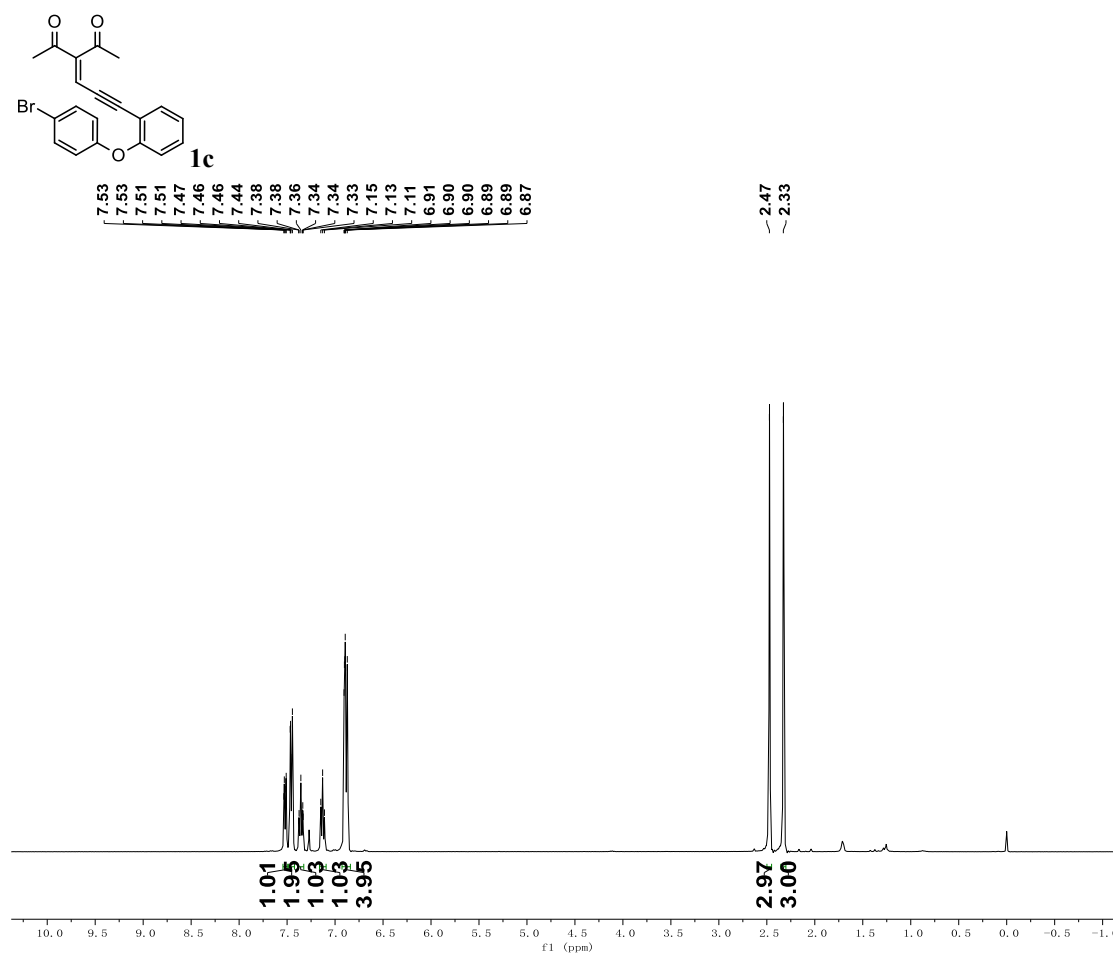

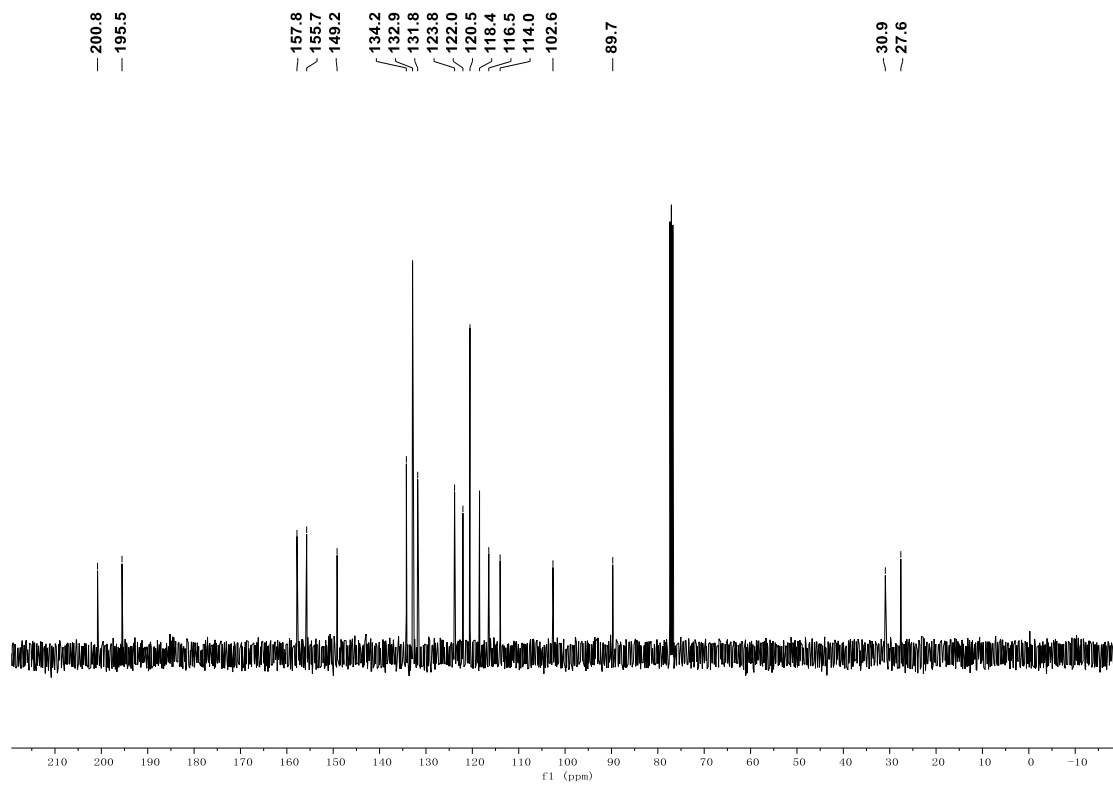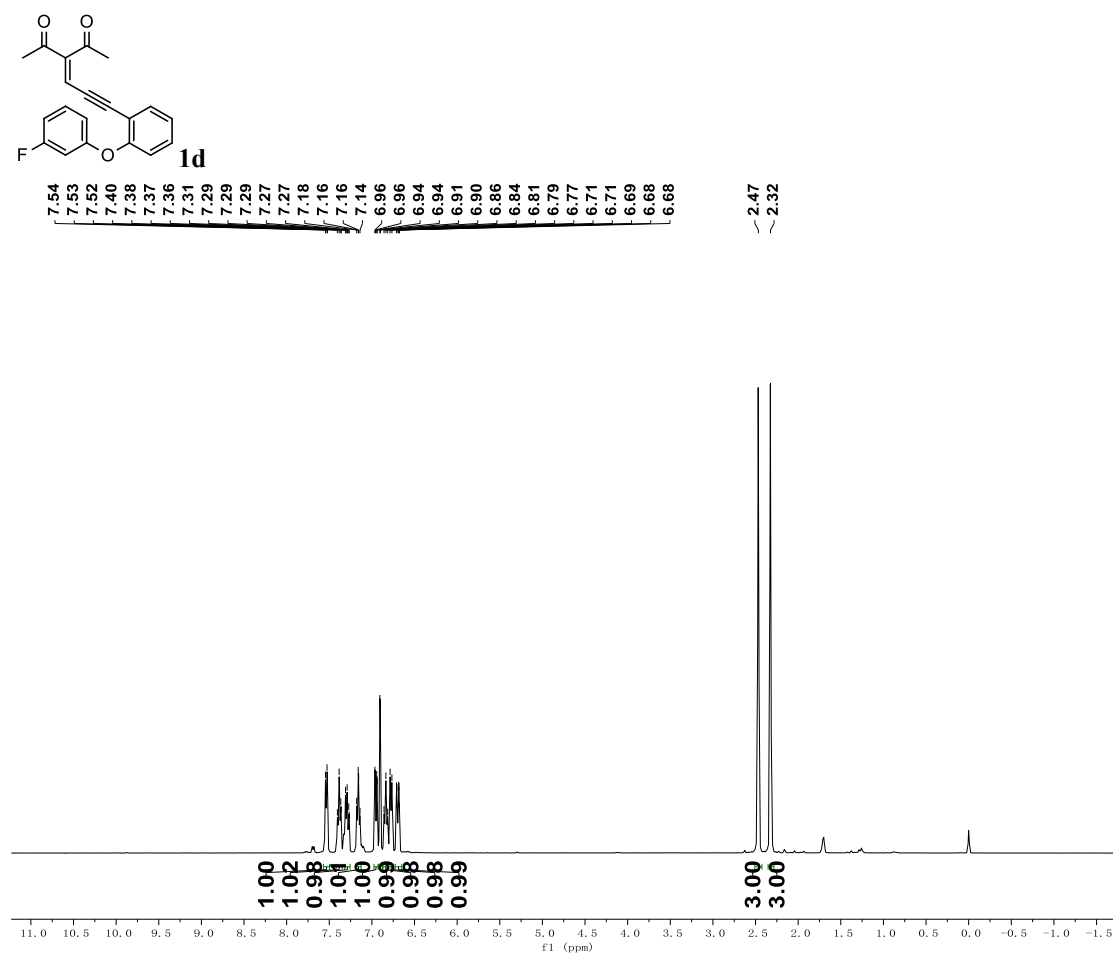

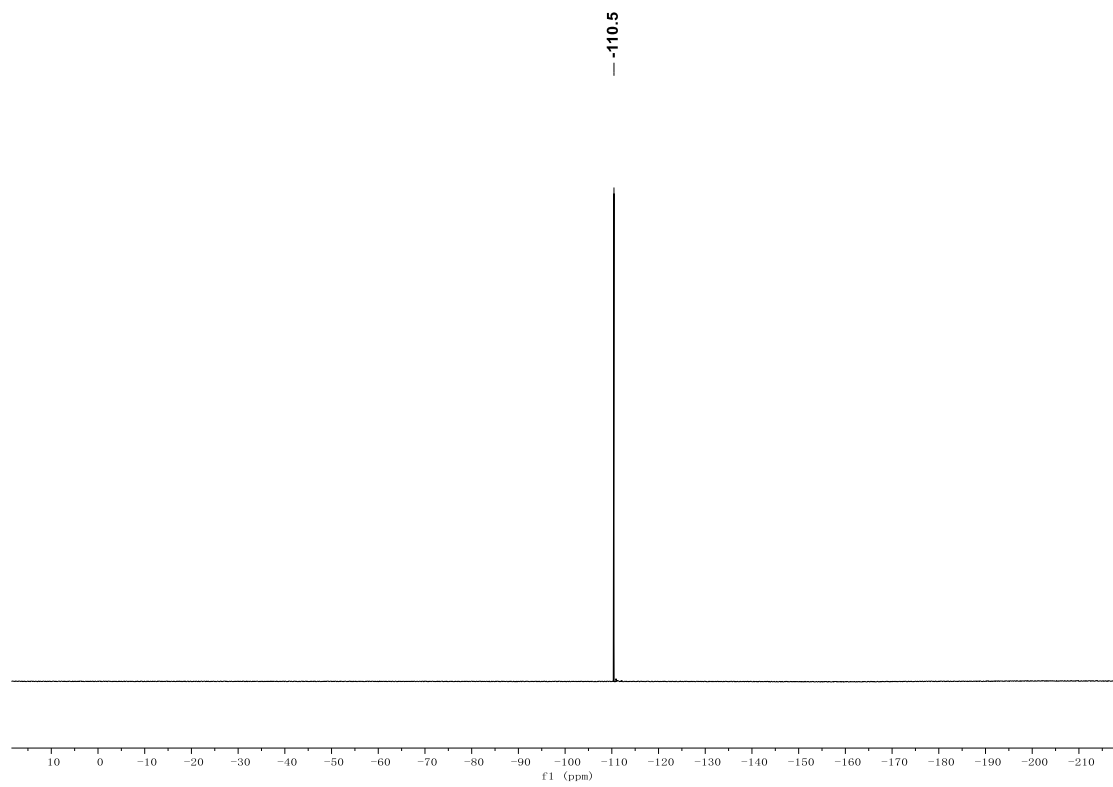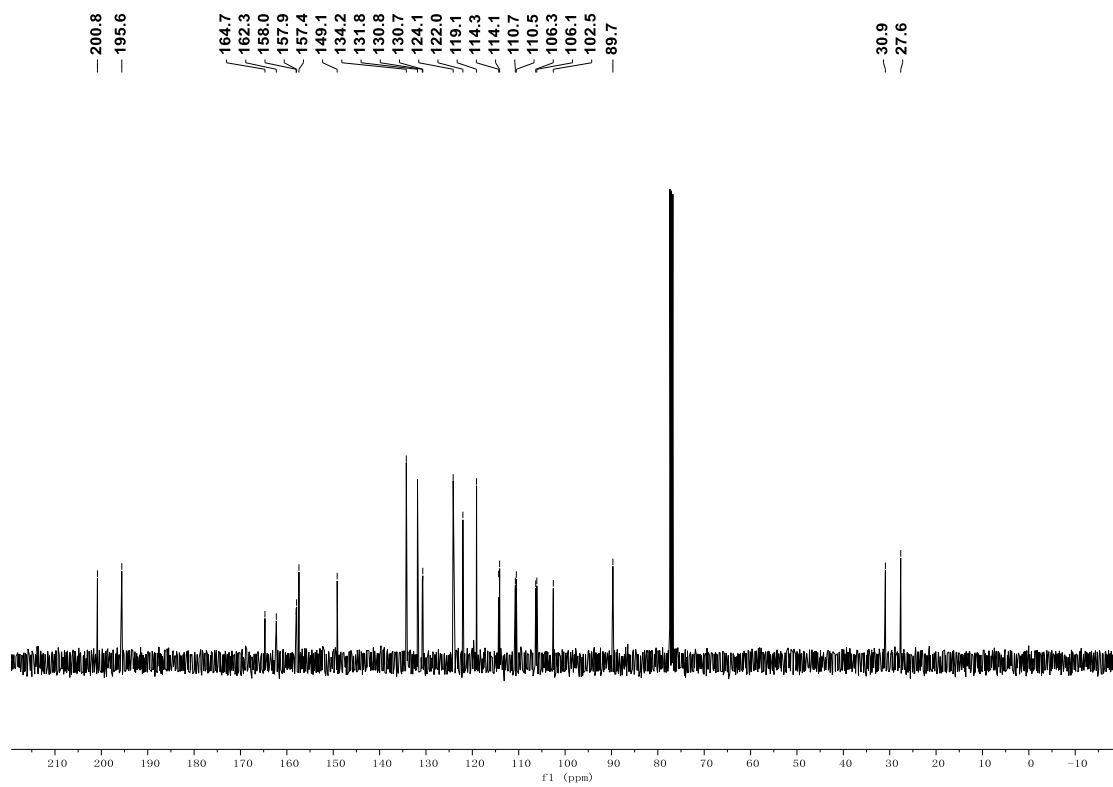

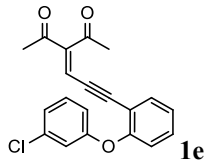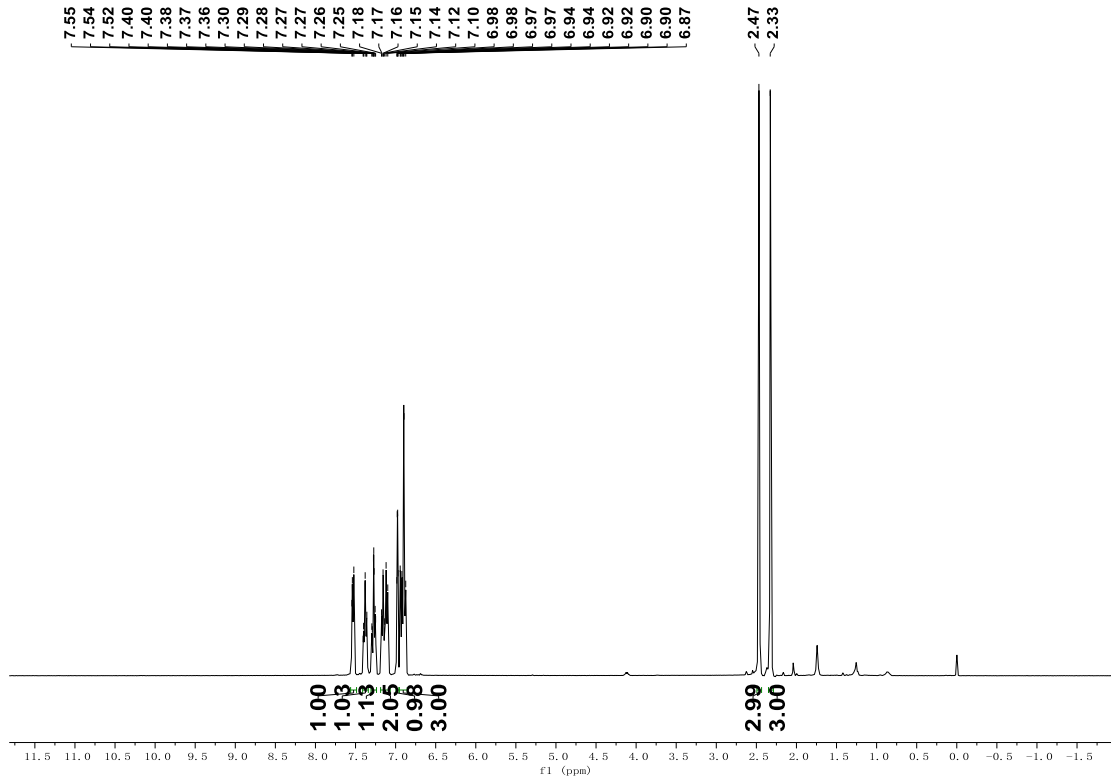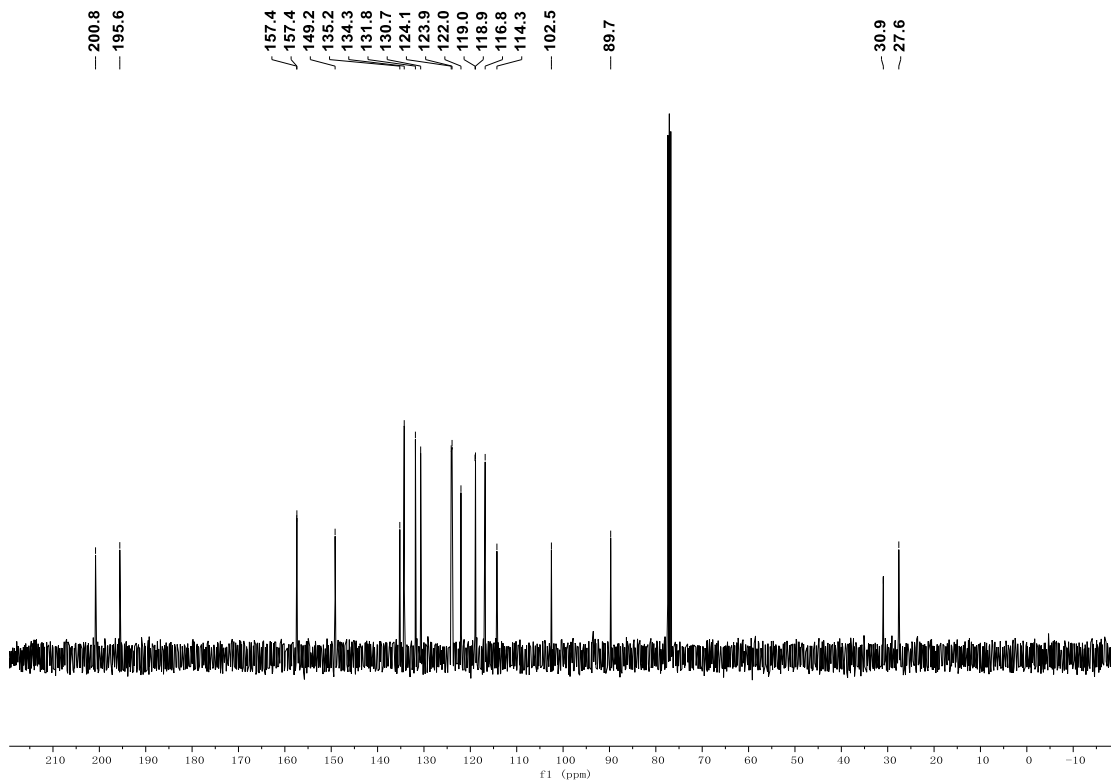

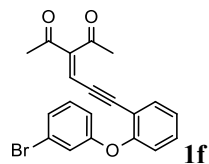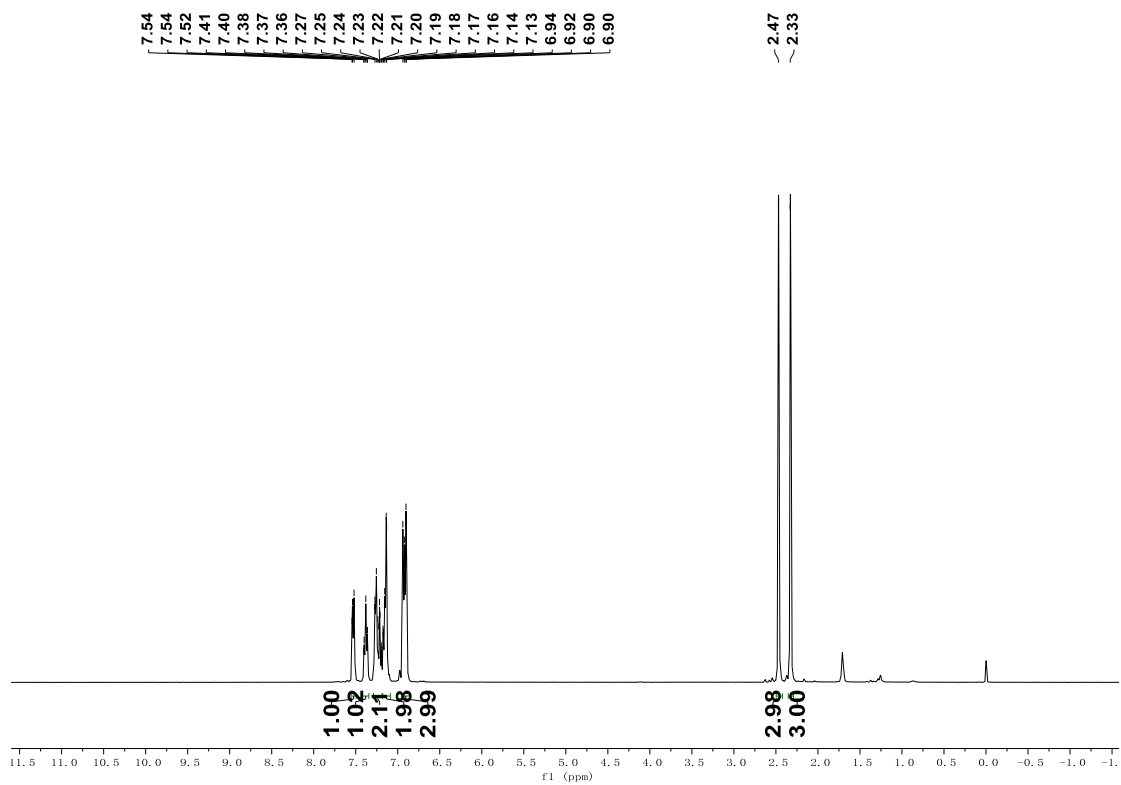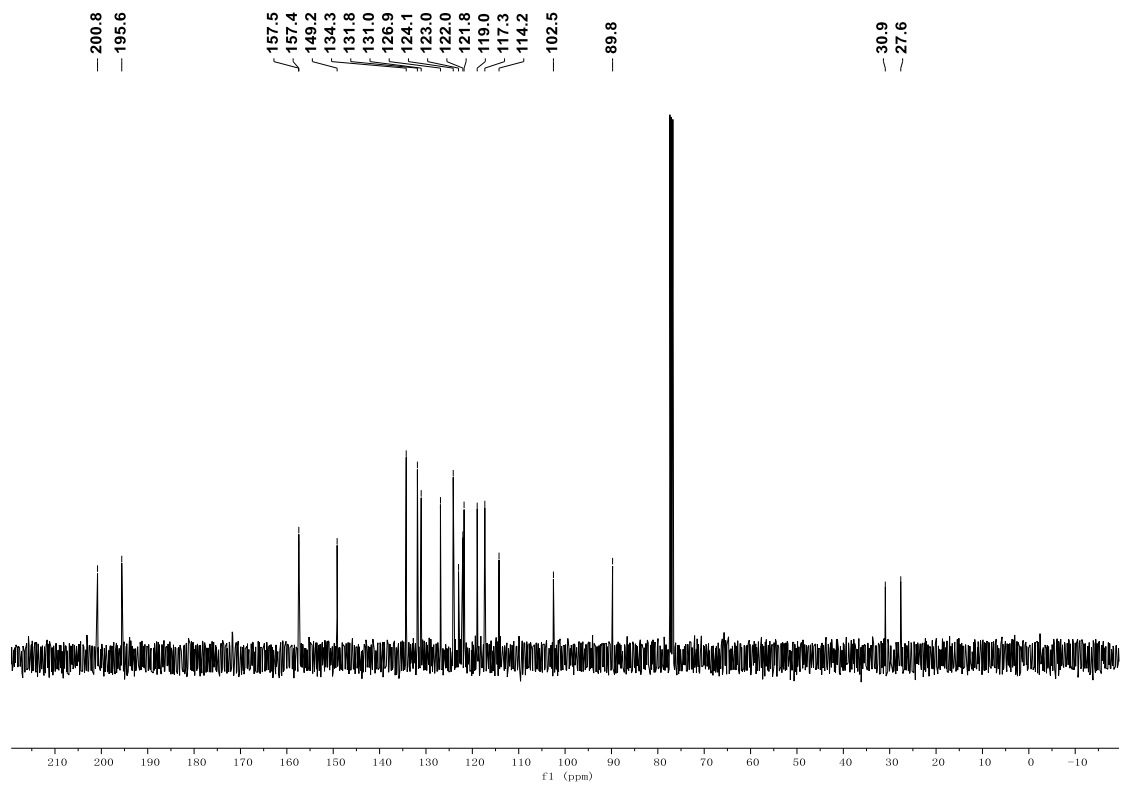

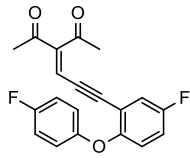

**1g**  
 7.22  
 7.21  
 7.20  
 7.19  
 7.07  
 7.06  
 7.05  
 7.04  
 7.04  
 6.96  
 6.95  
 6.95  
 6.94  
 6.94  
 6.89  
 6.83  
 6.82  
 6.81  
 6.80

2.47  
 2.34

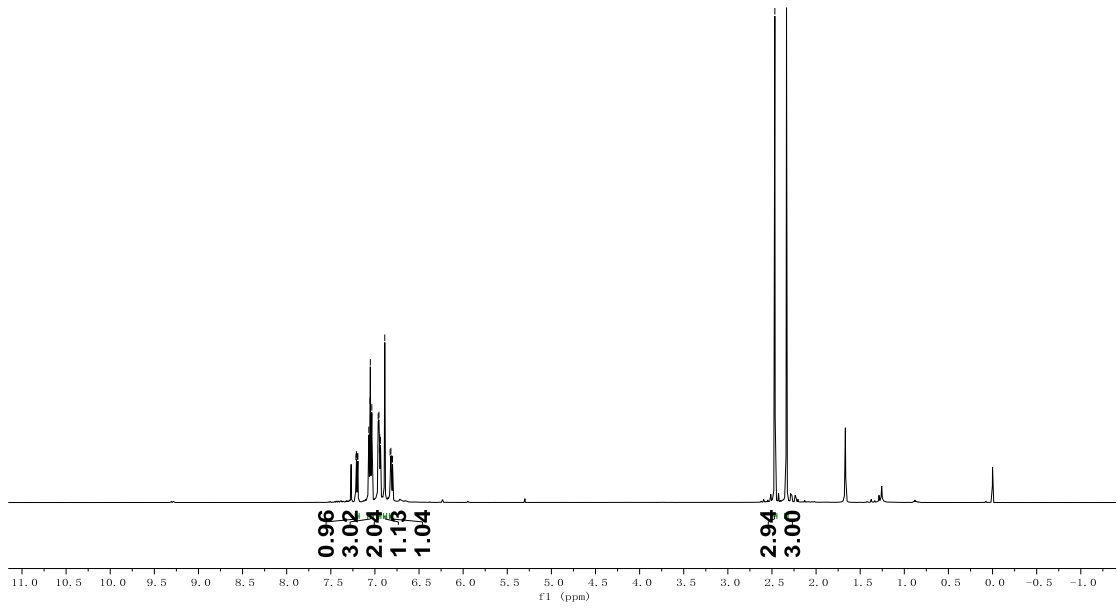

-119.0  
 -119.1

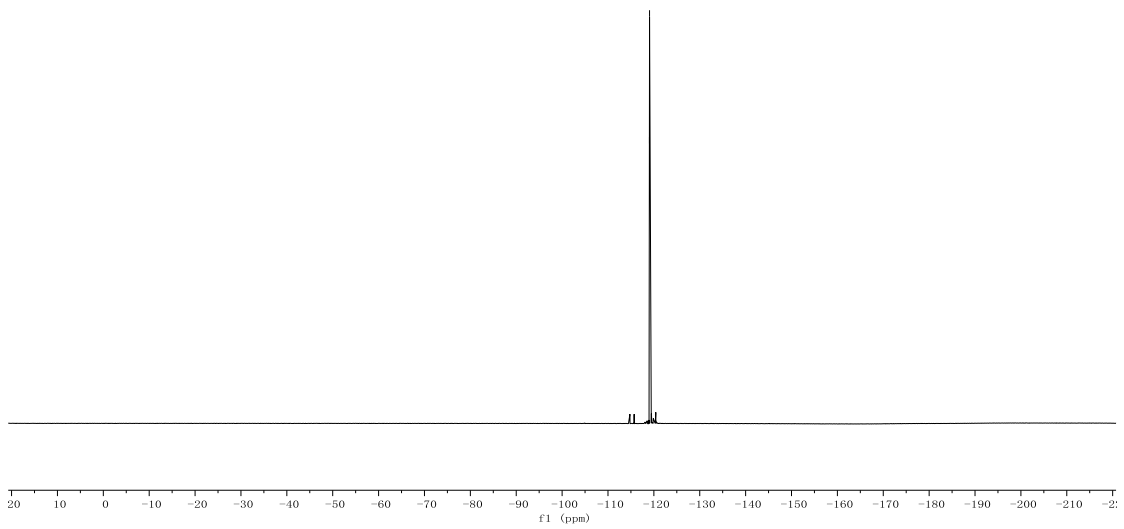

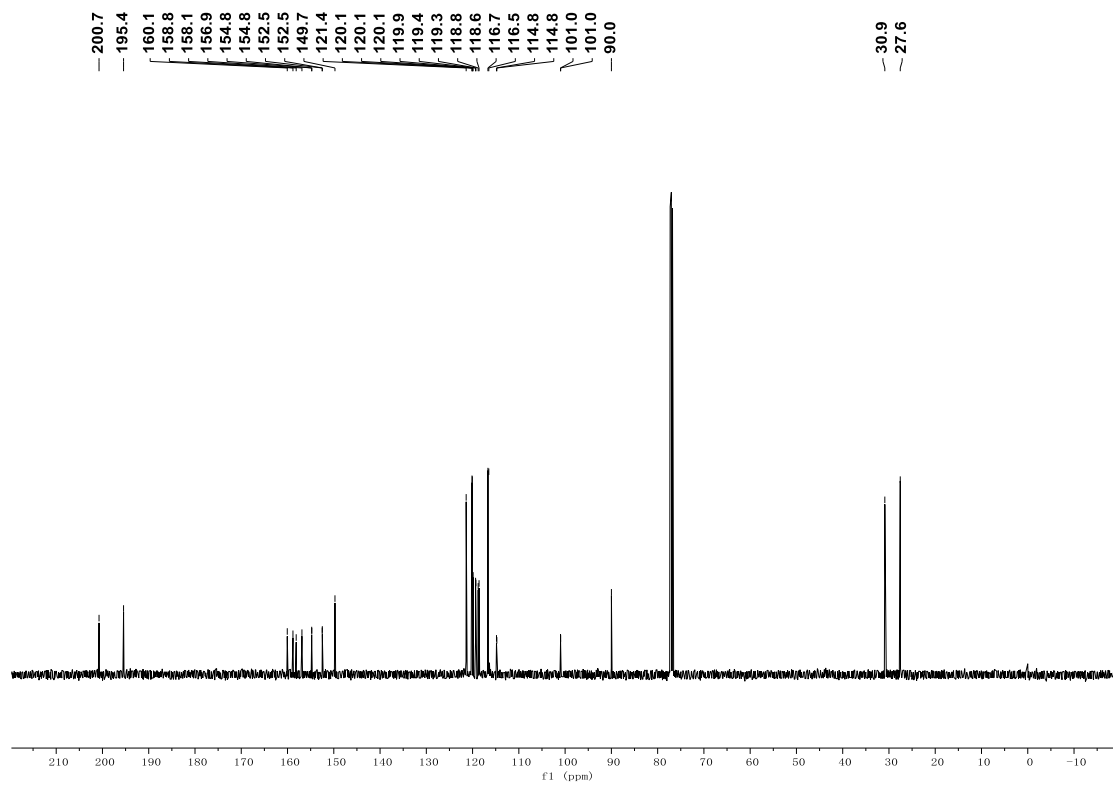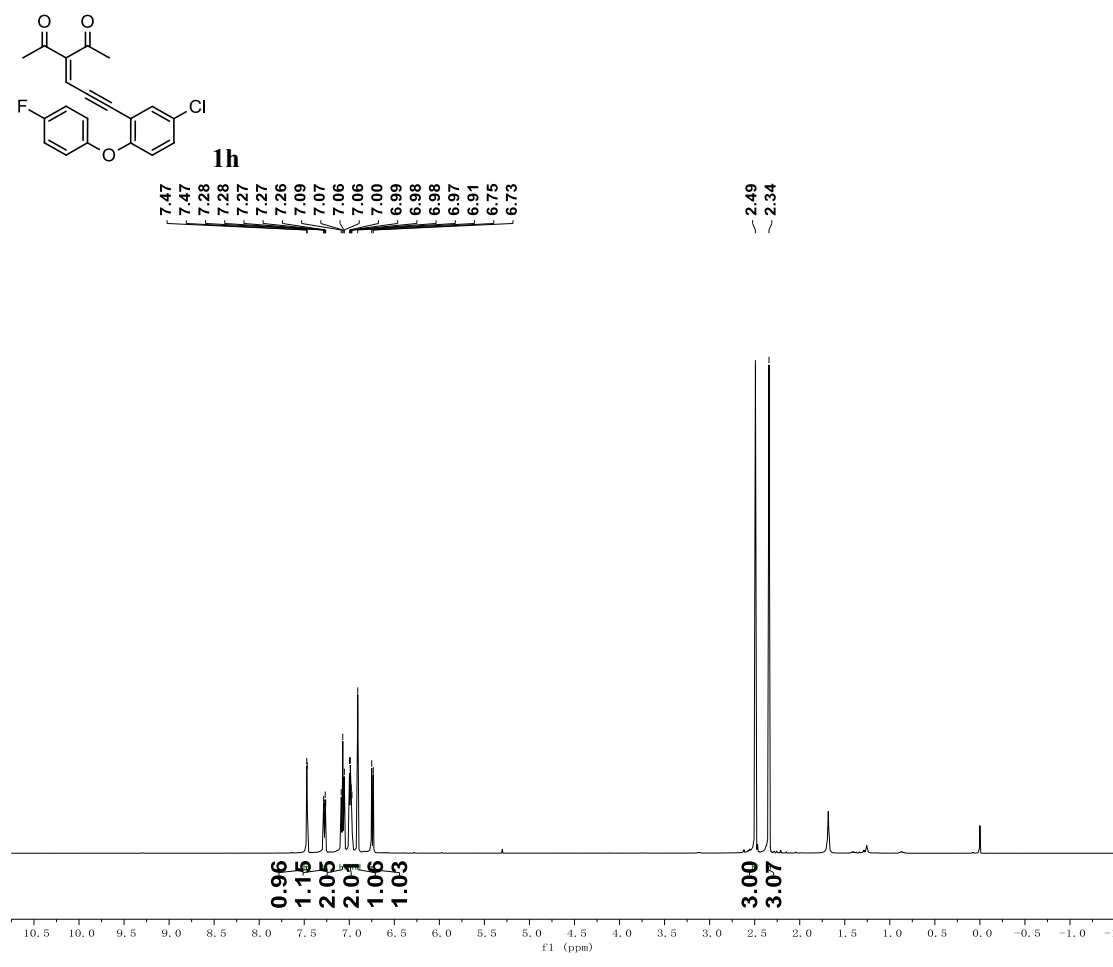



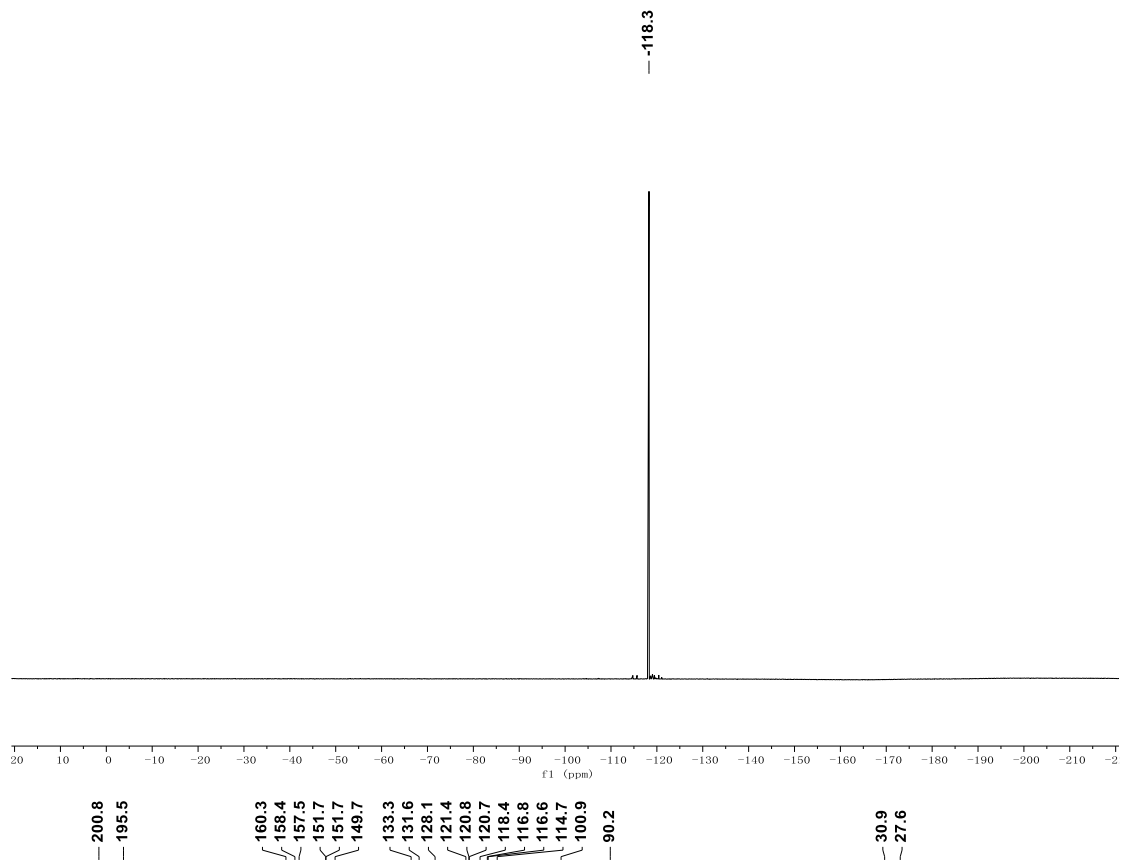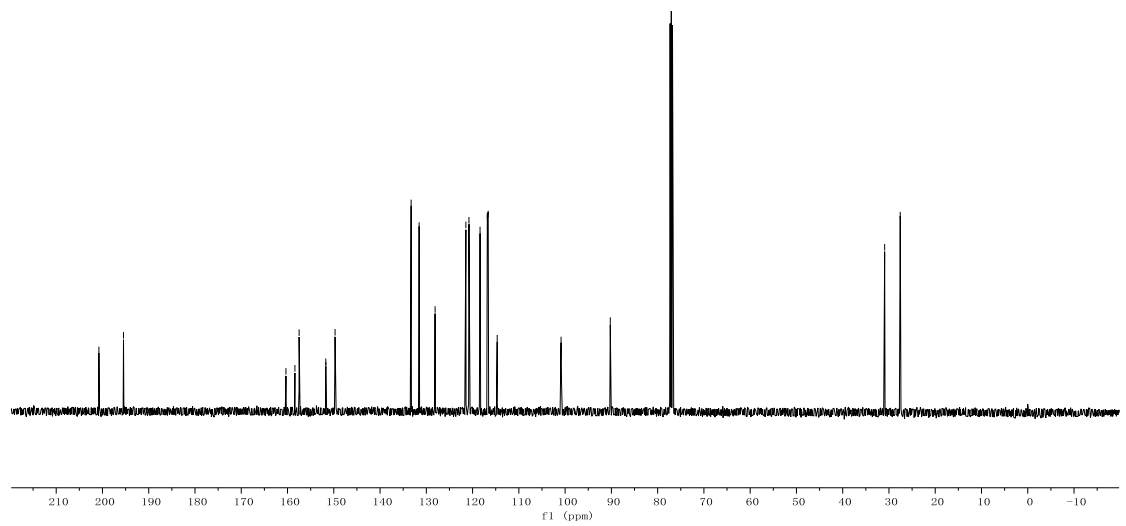

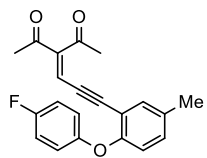

**1i**

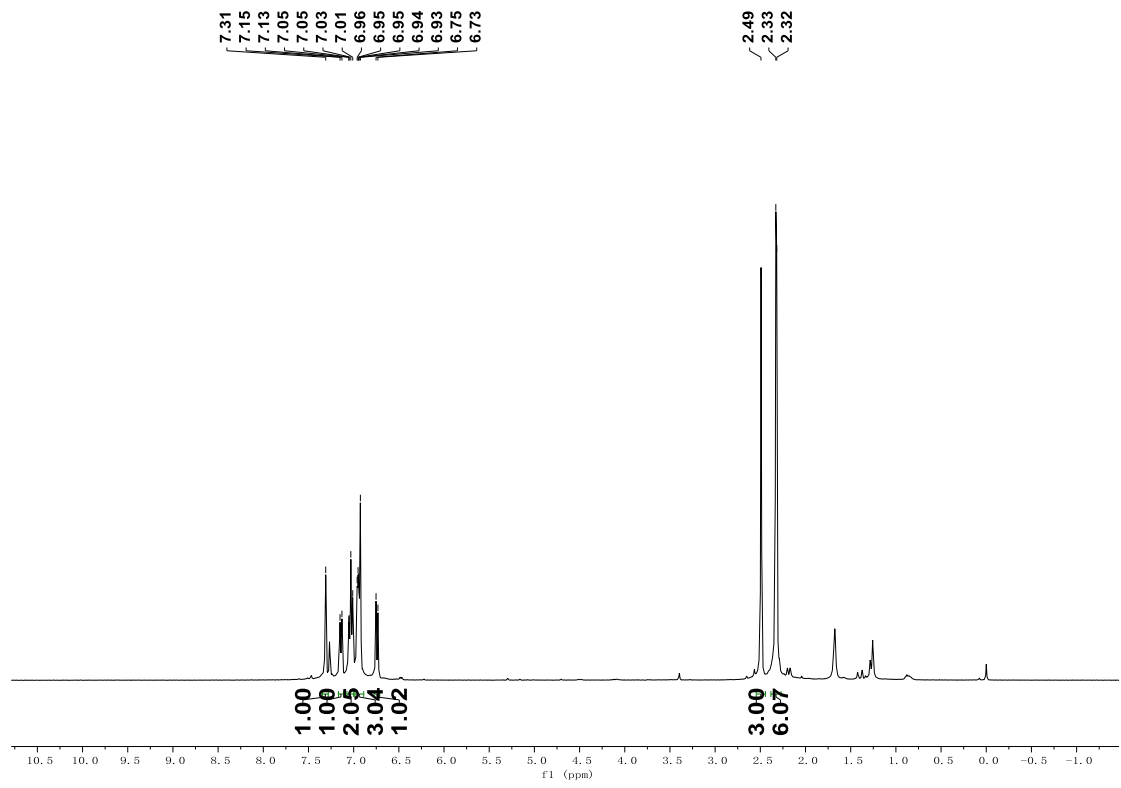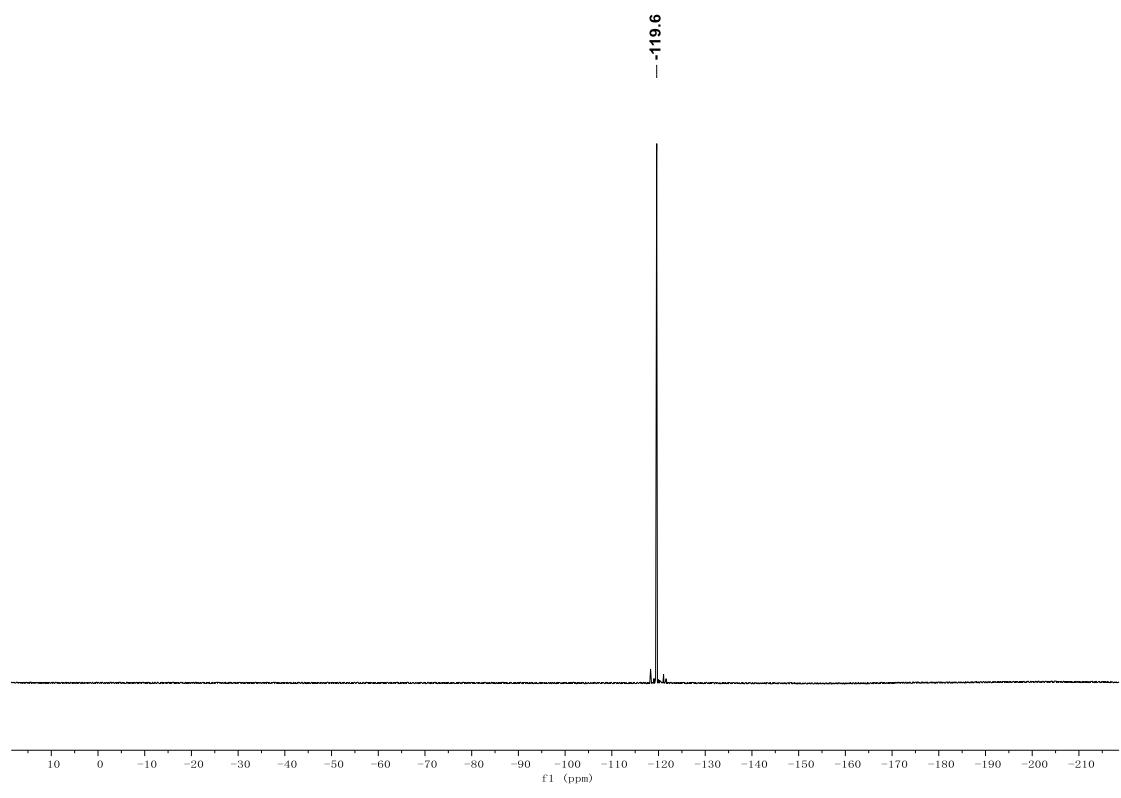

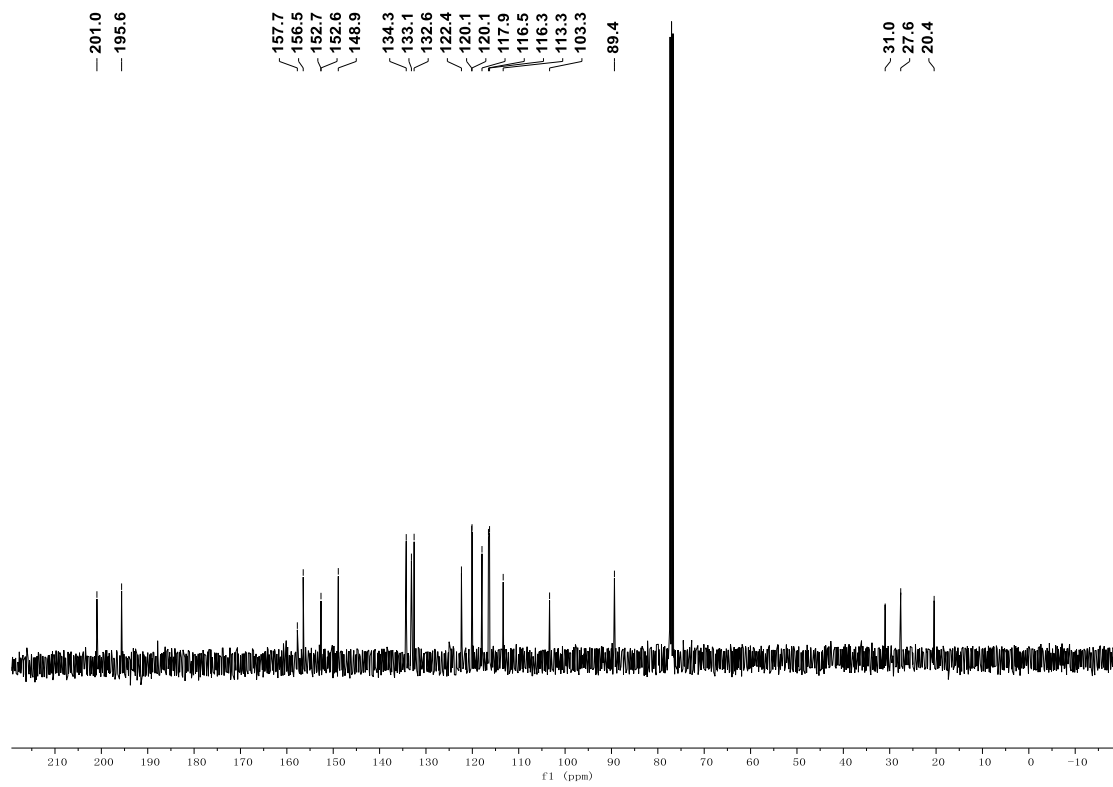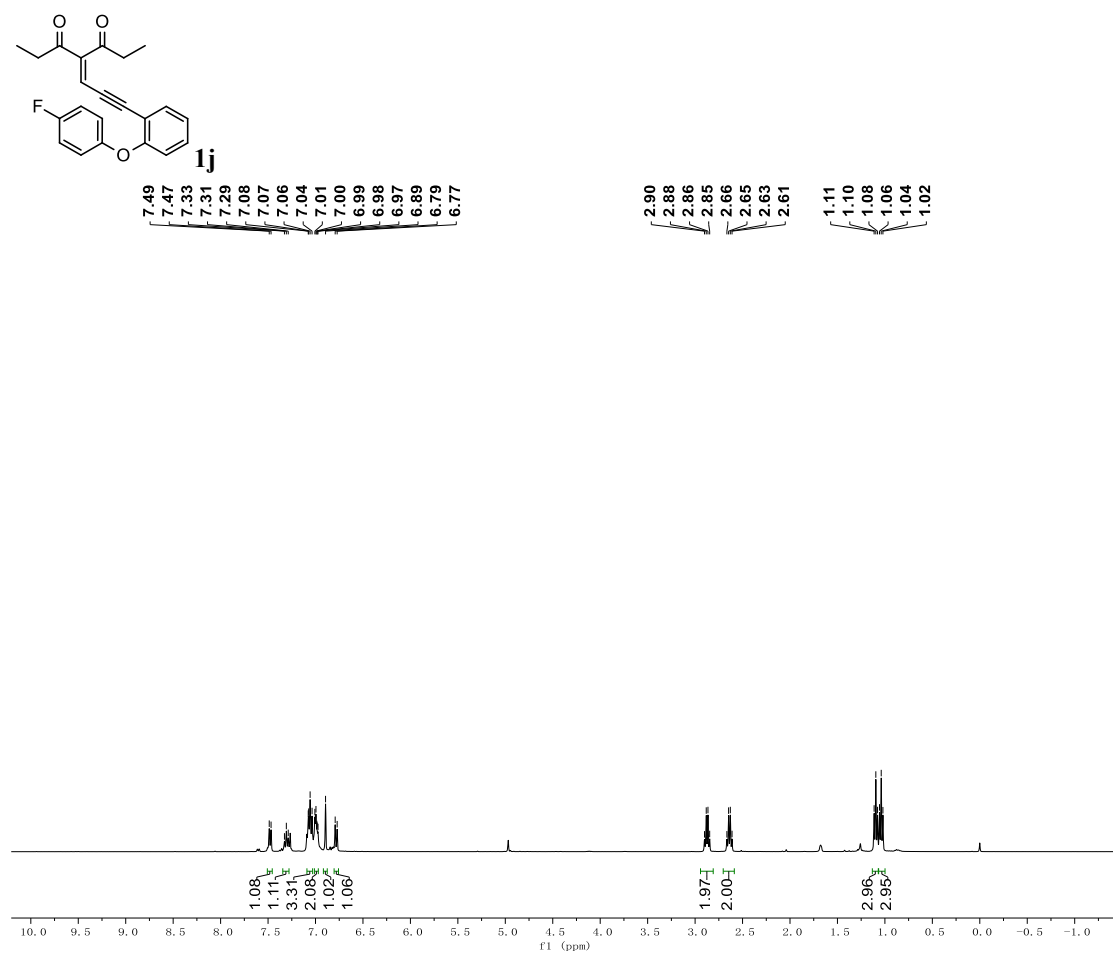

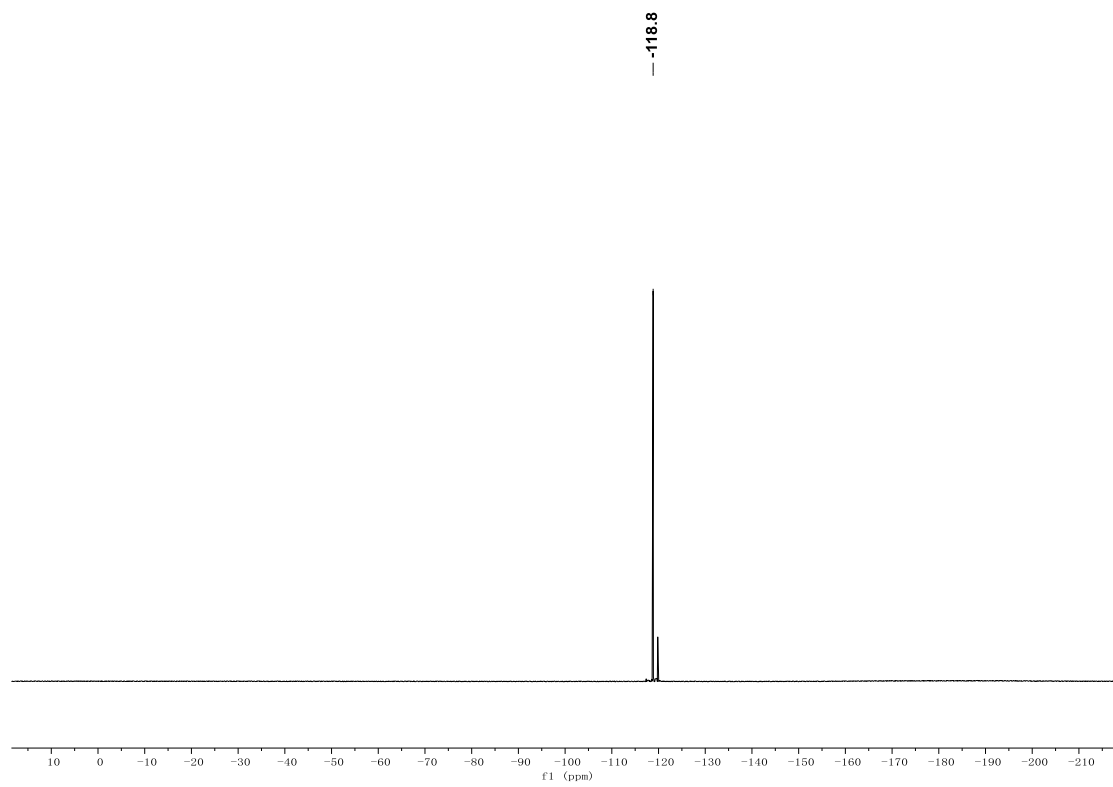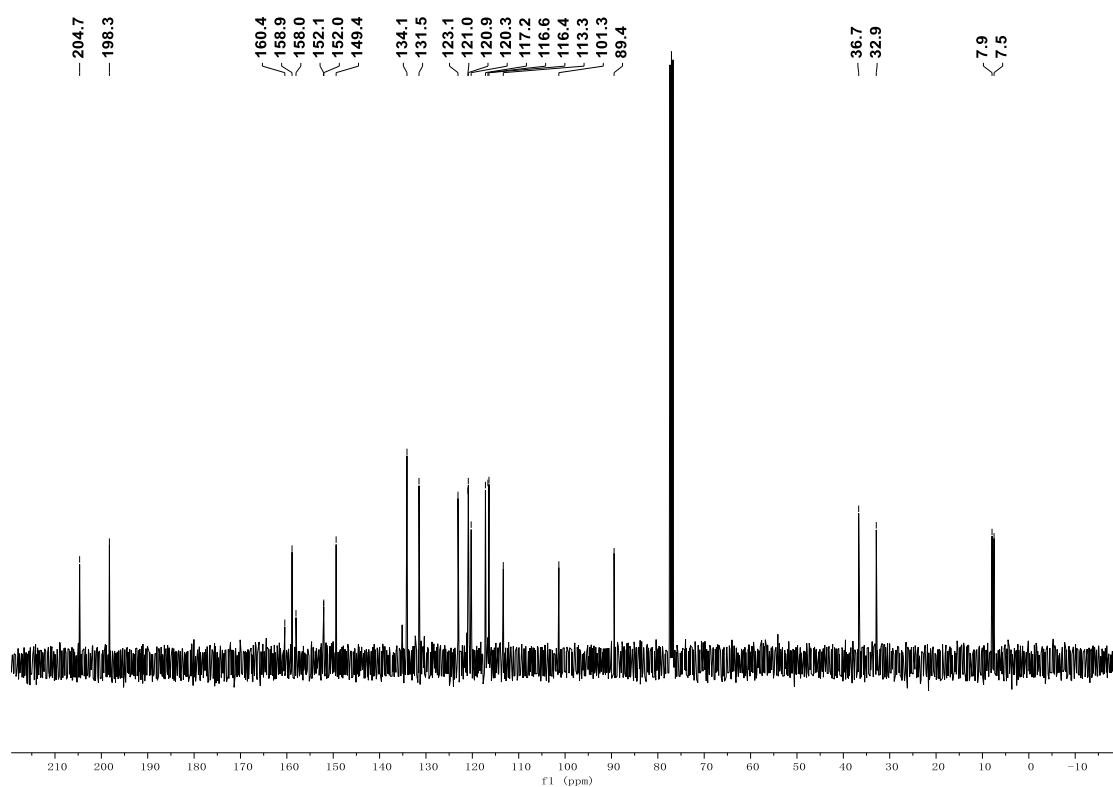

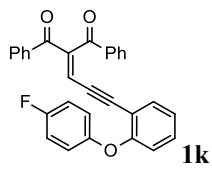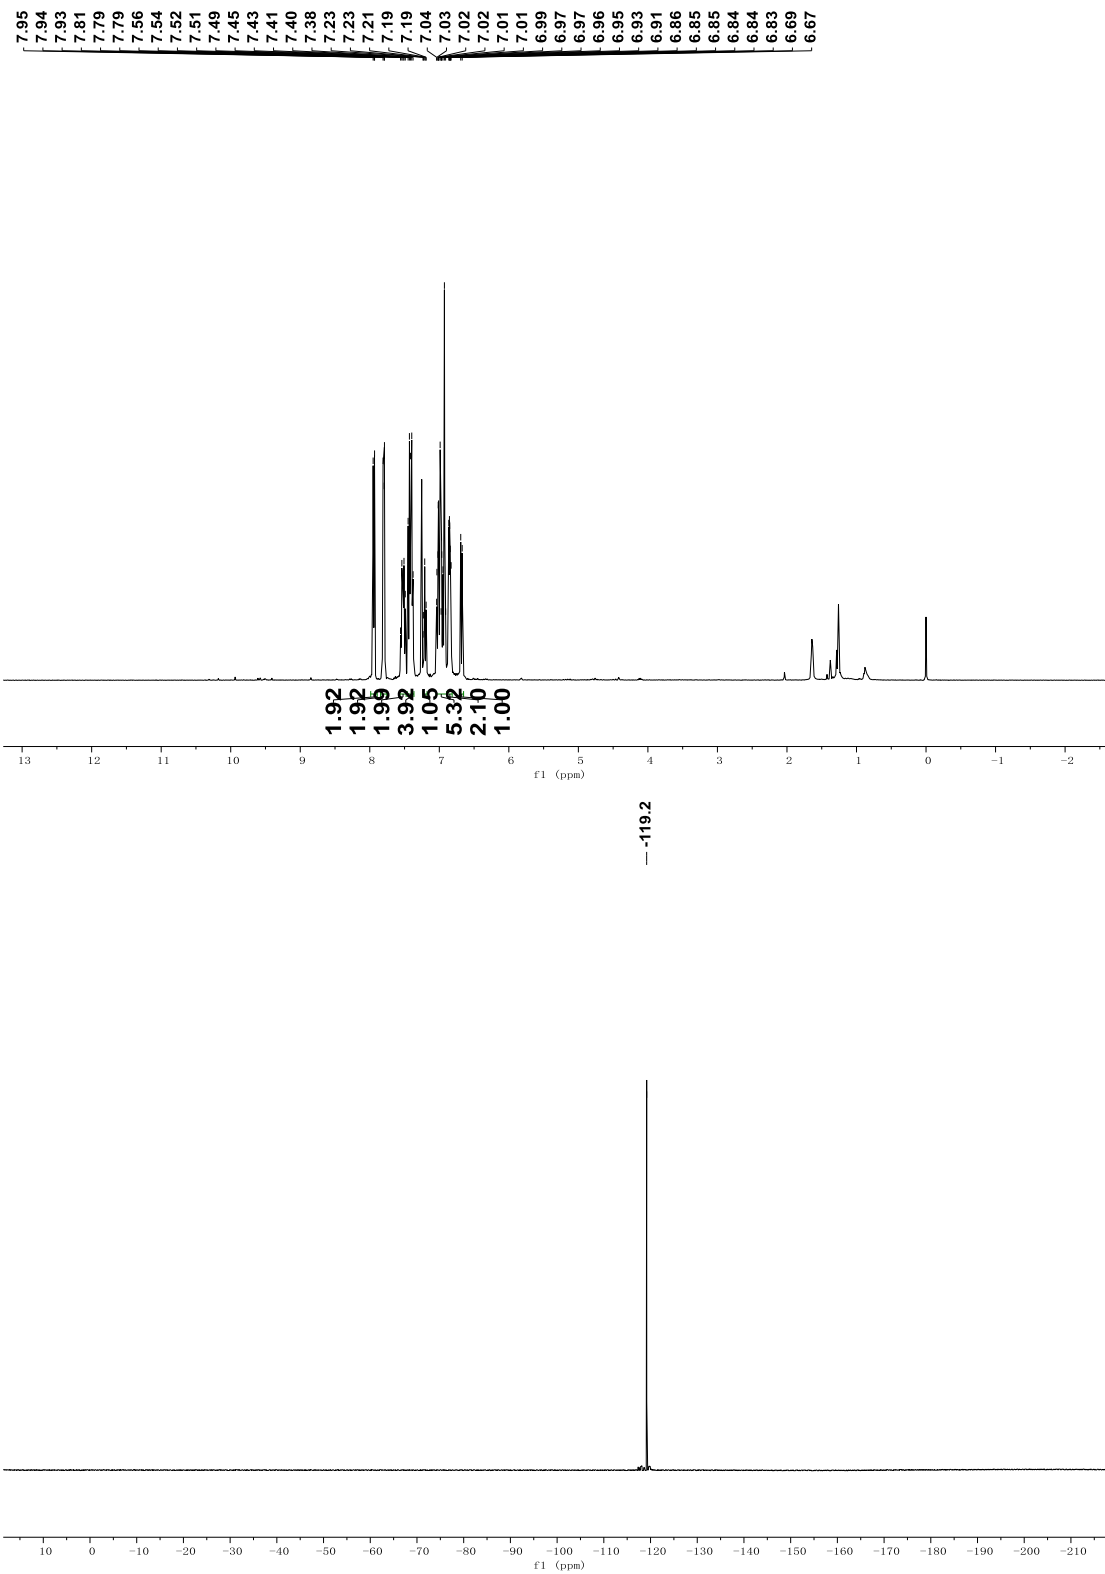

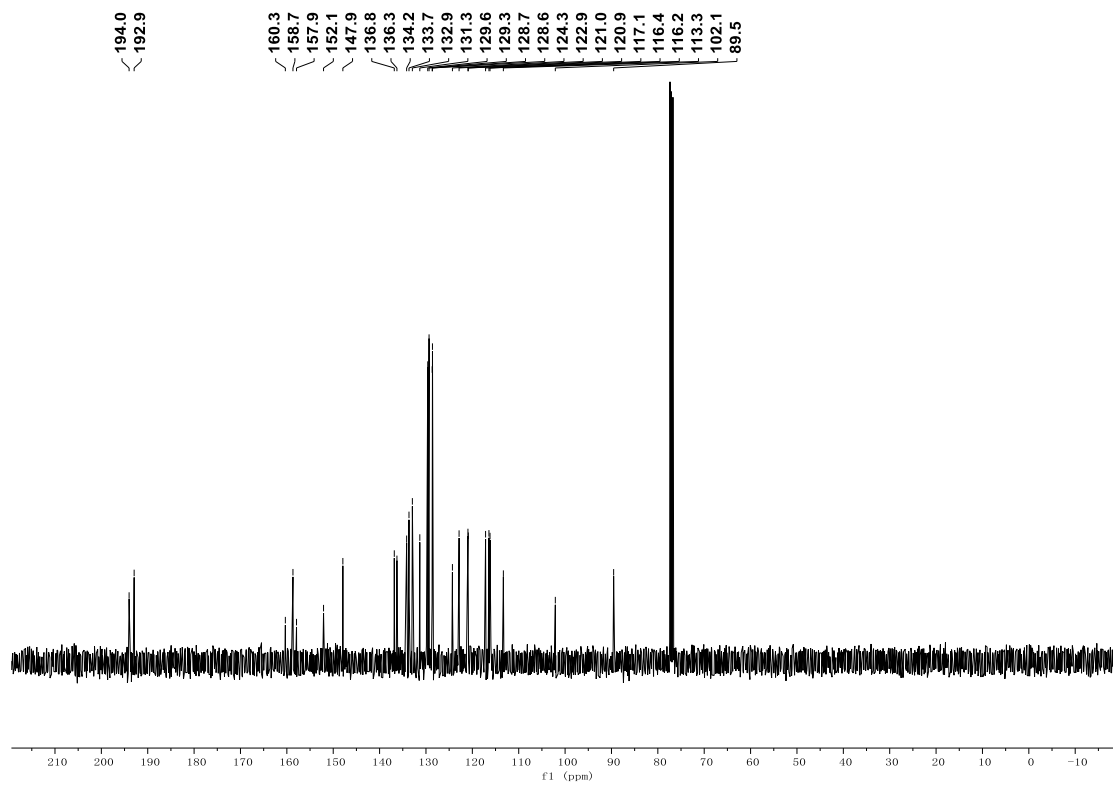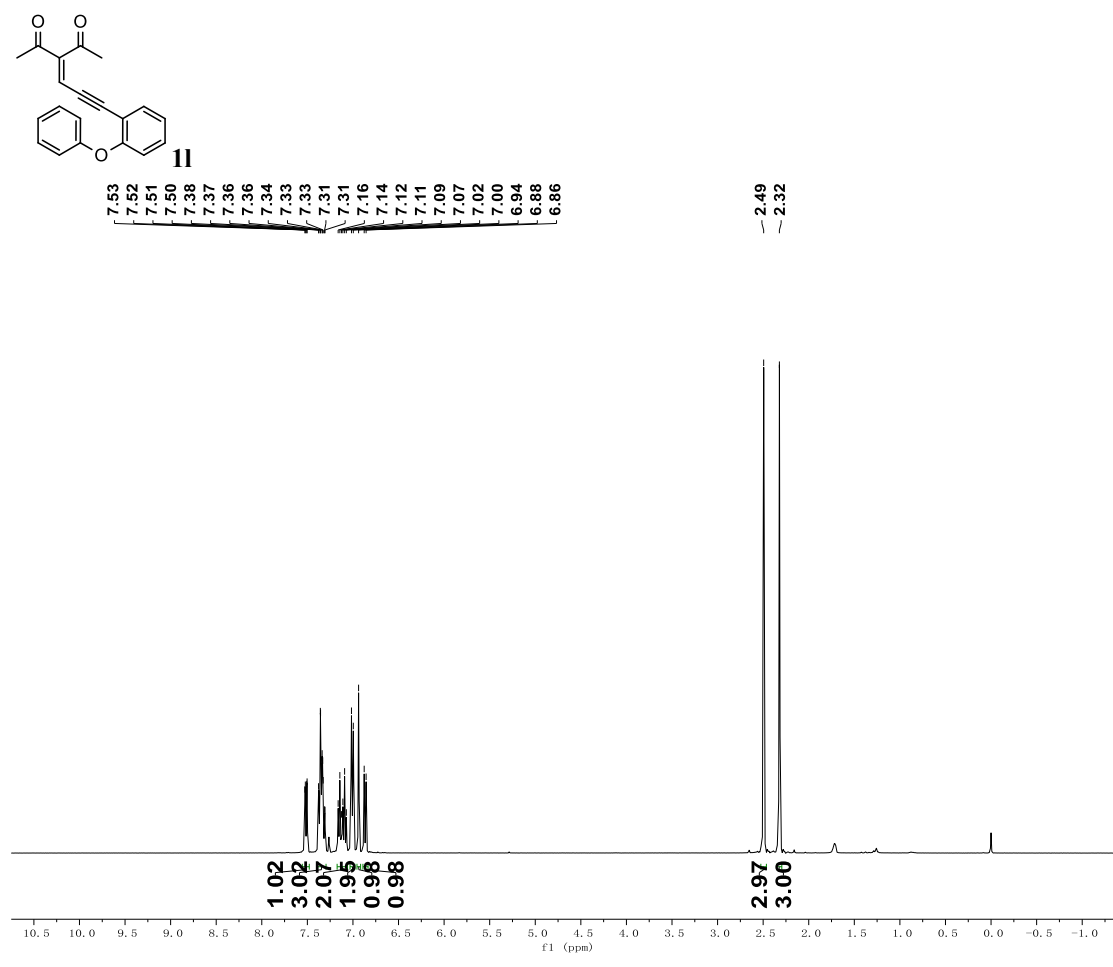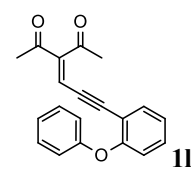

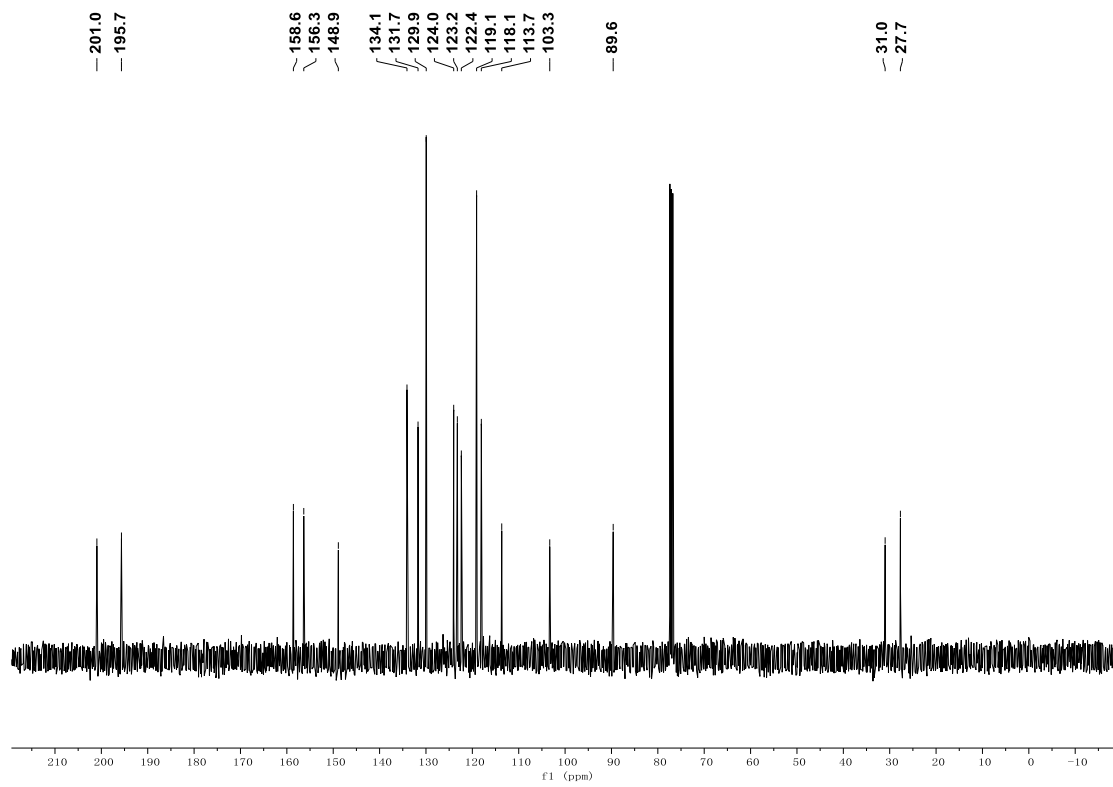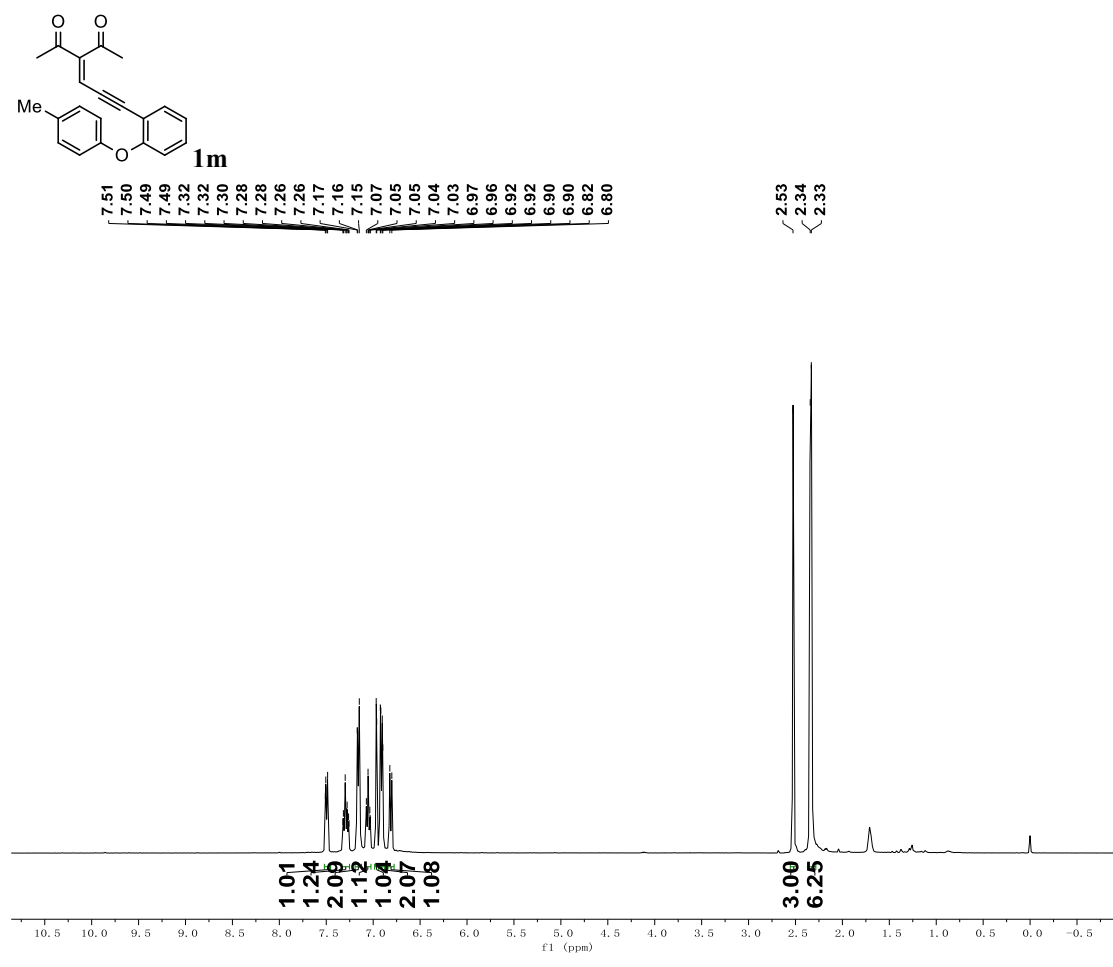

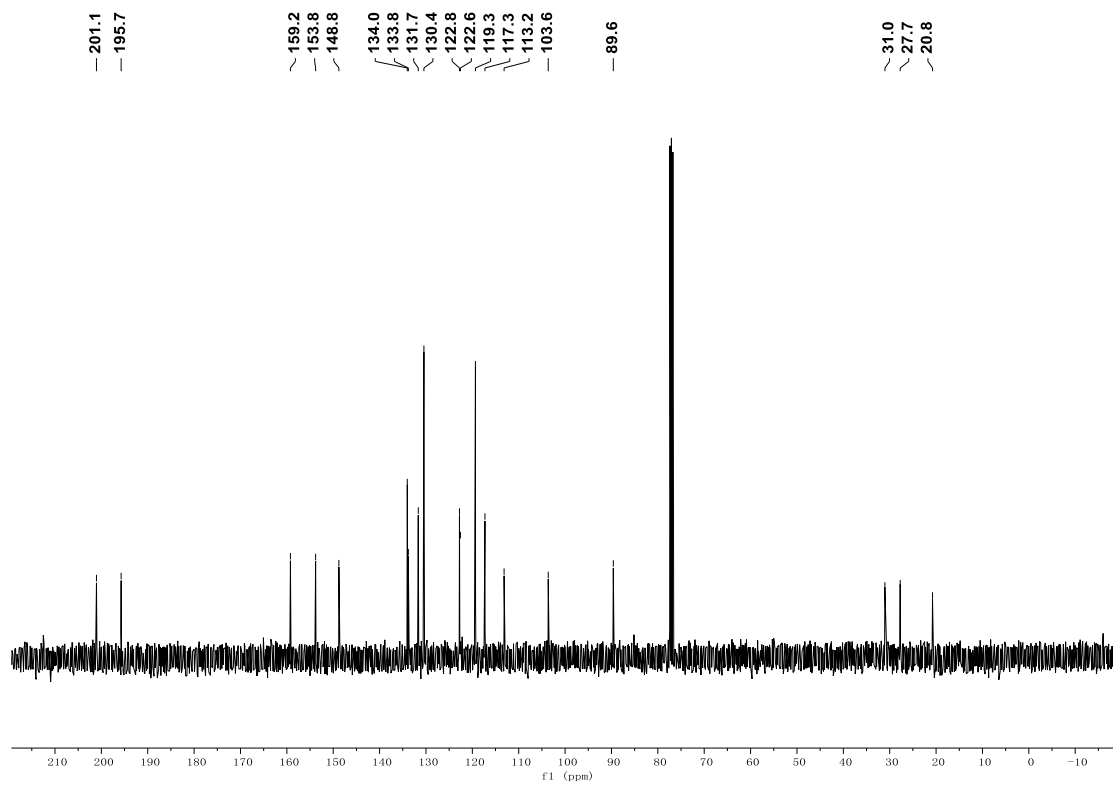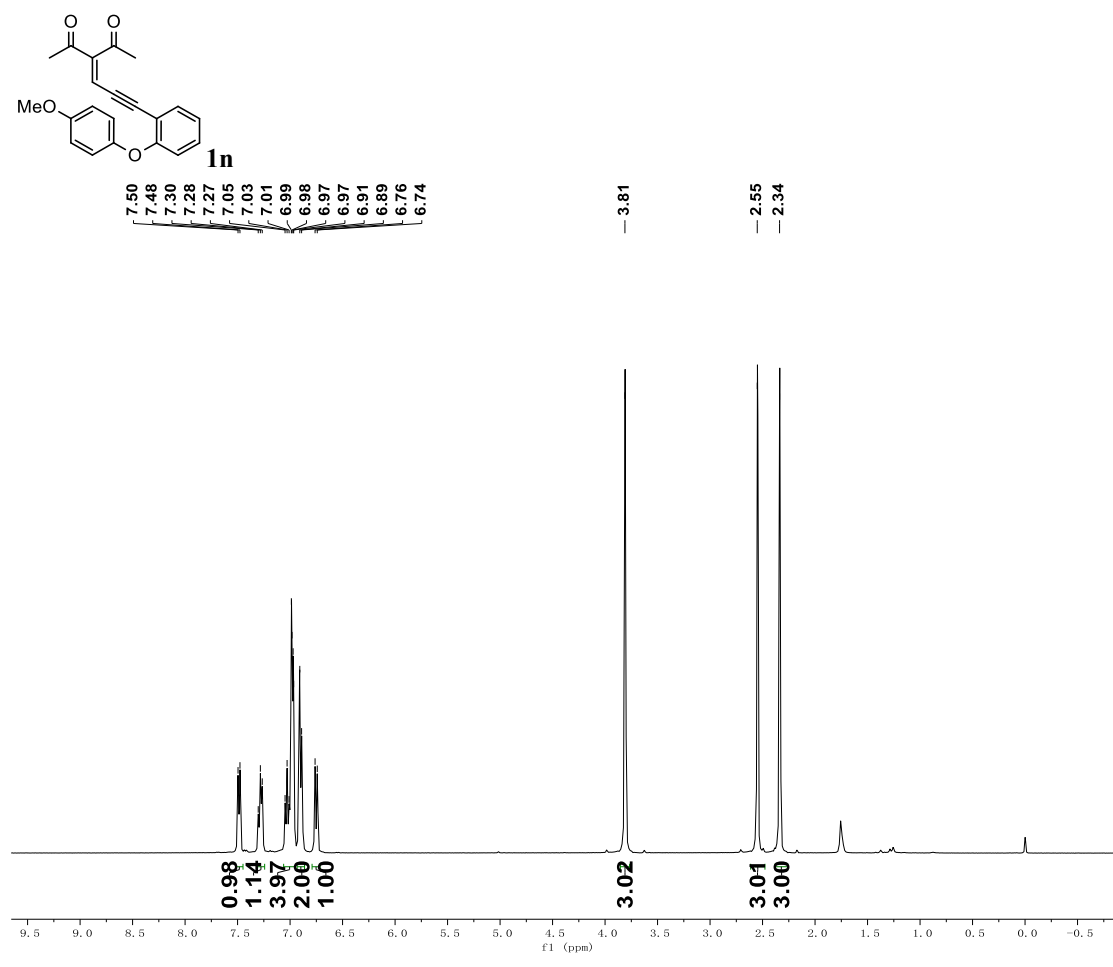



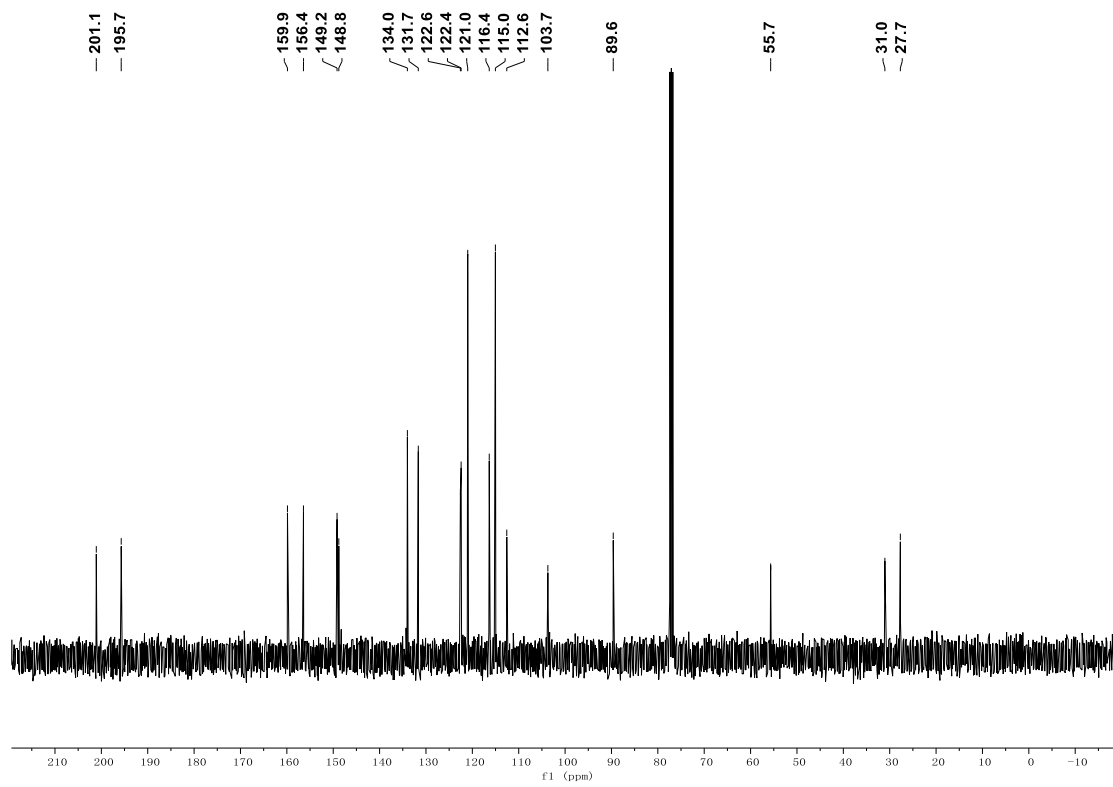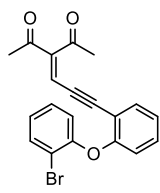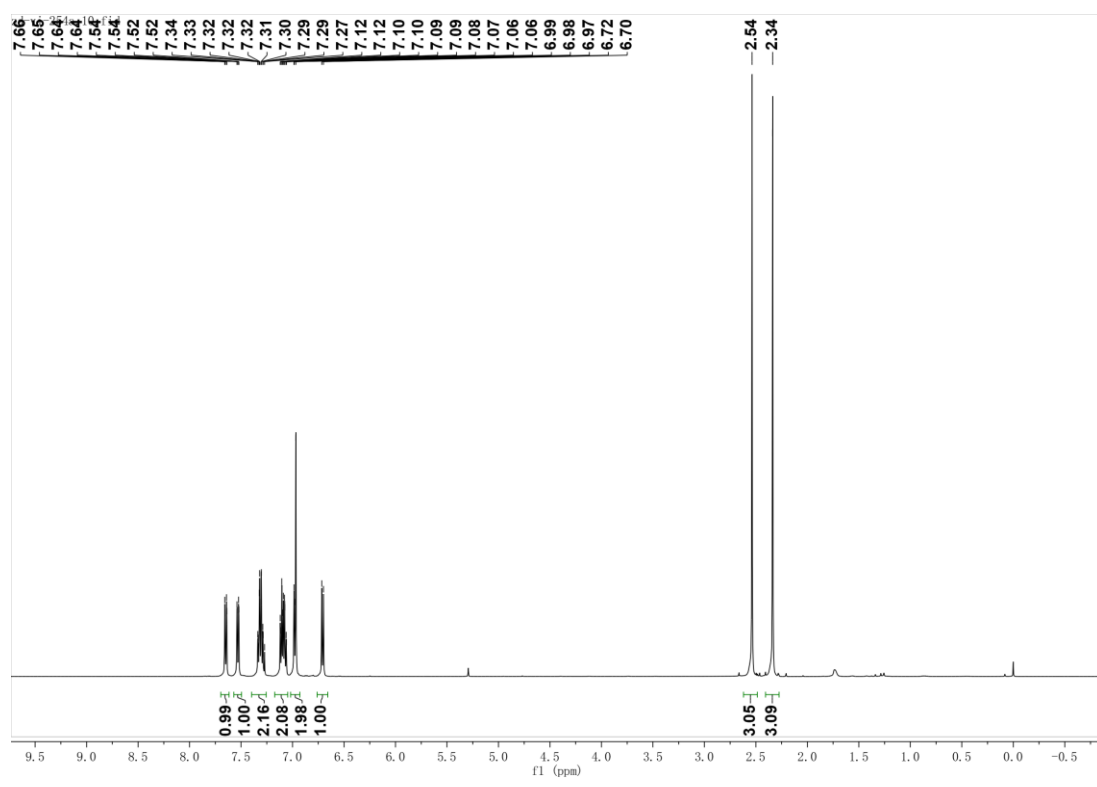

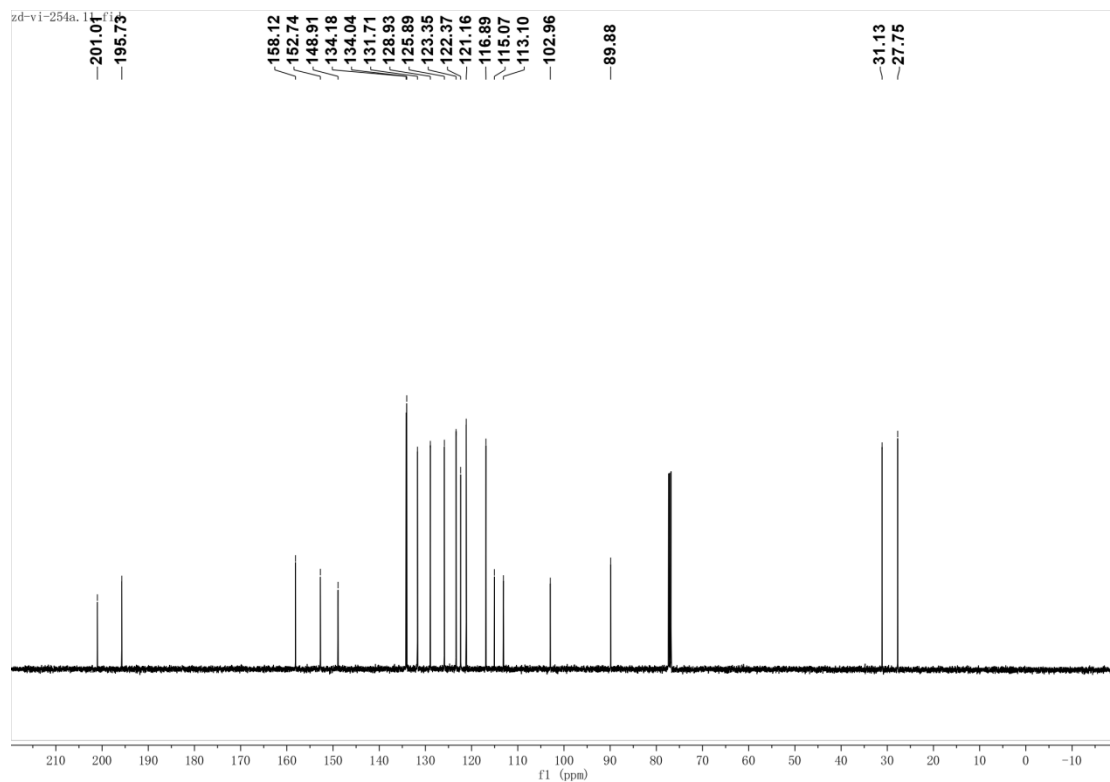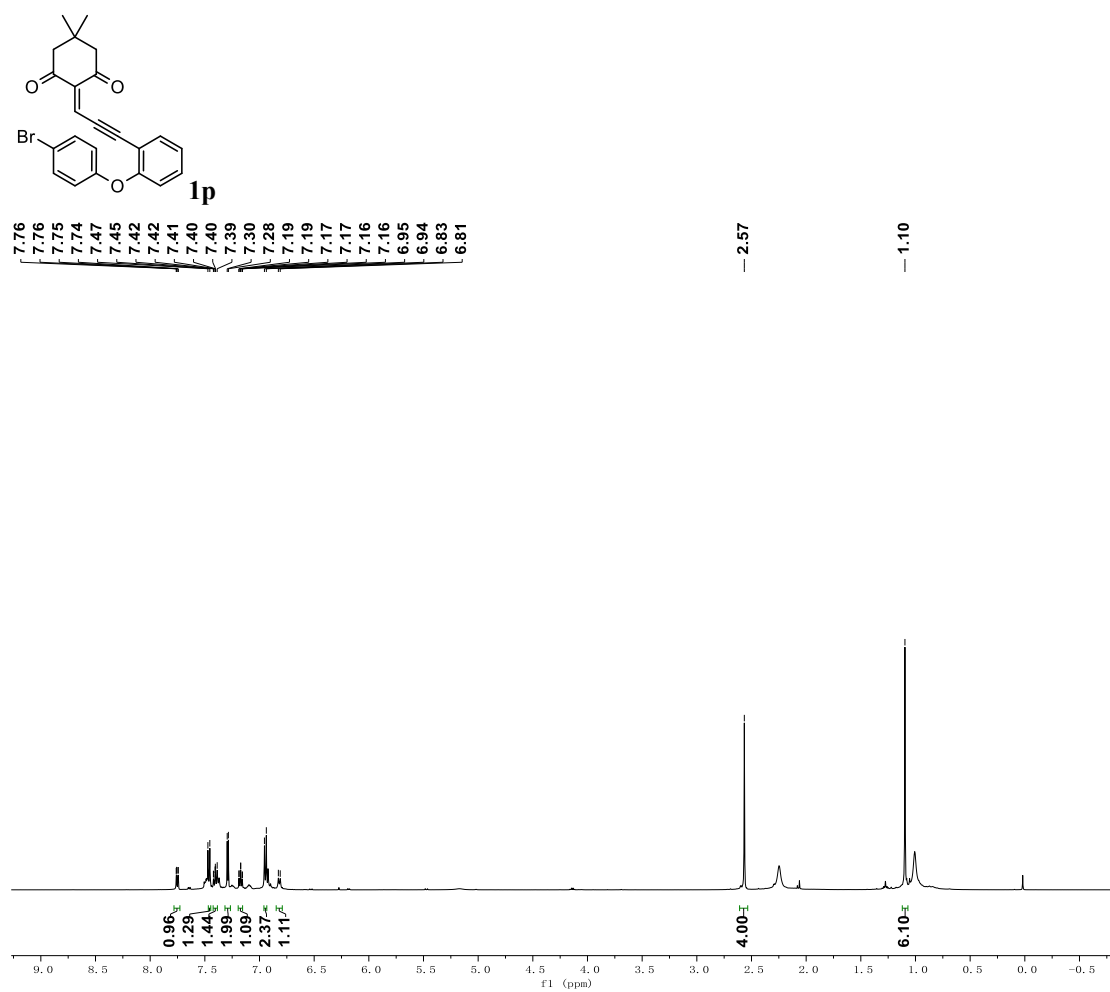

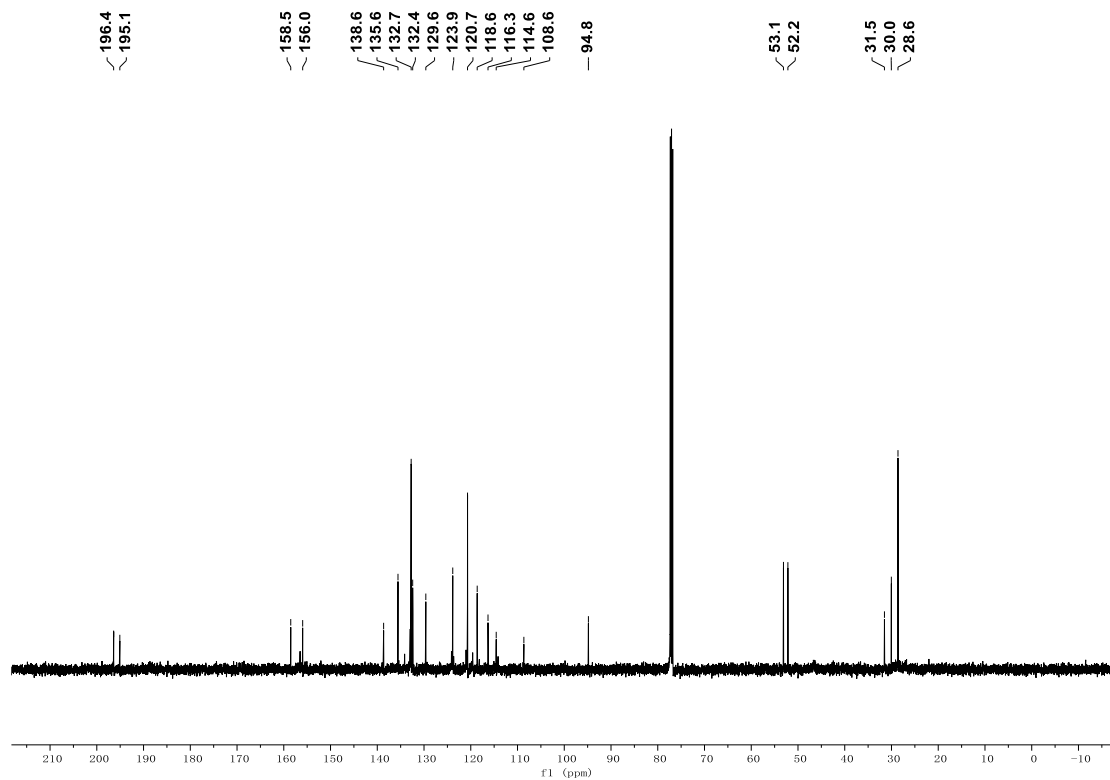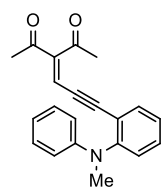

**1q**

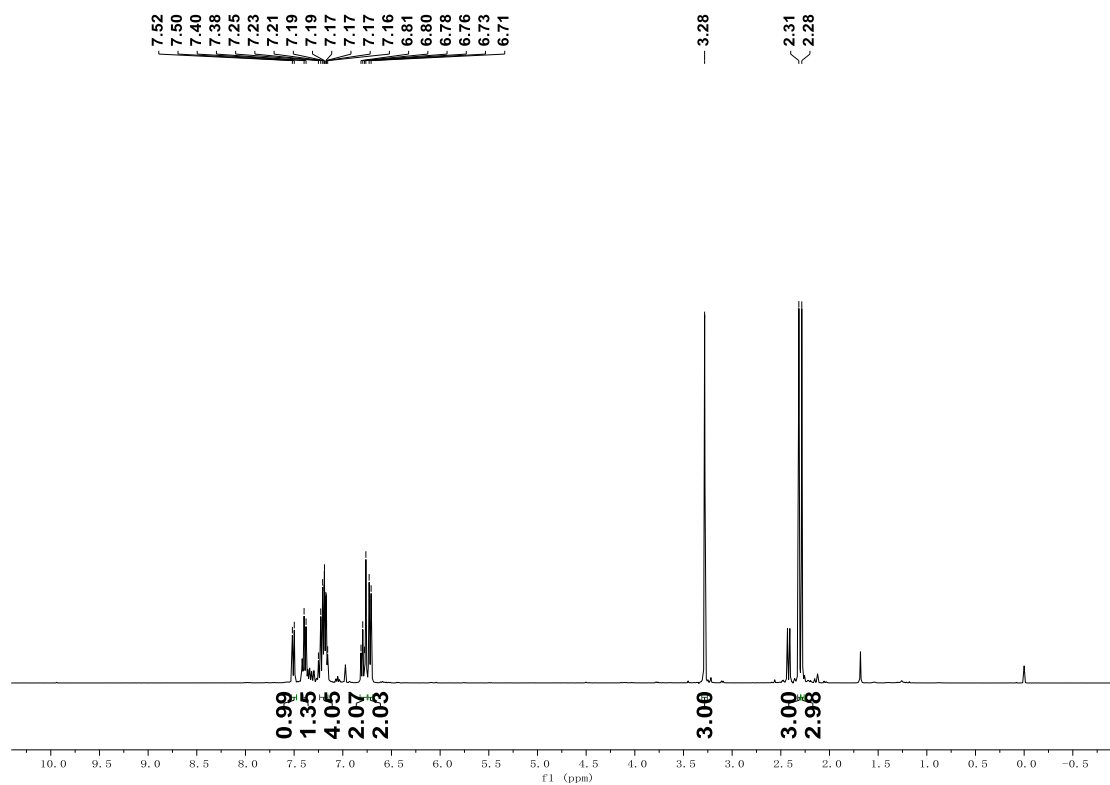

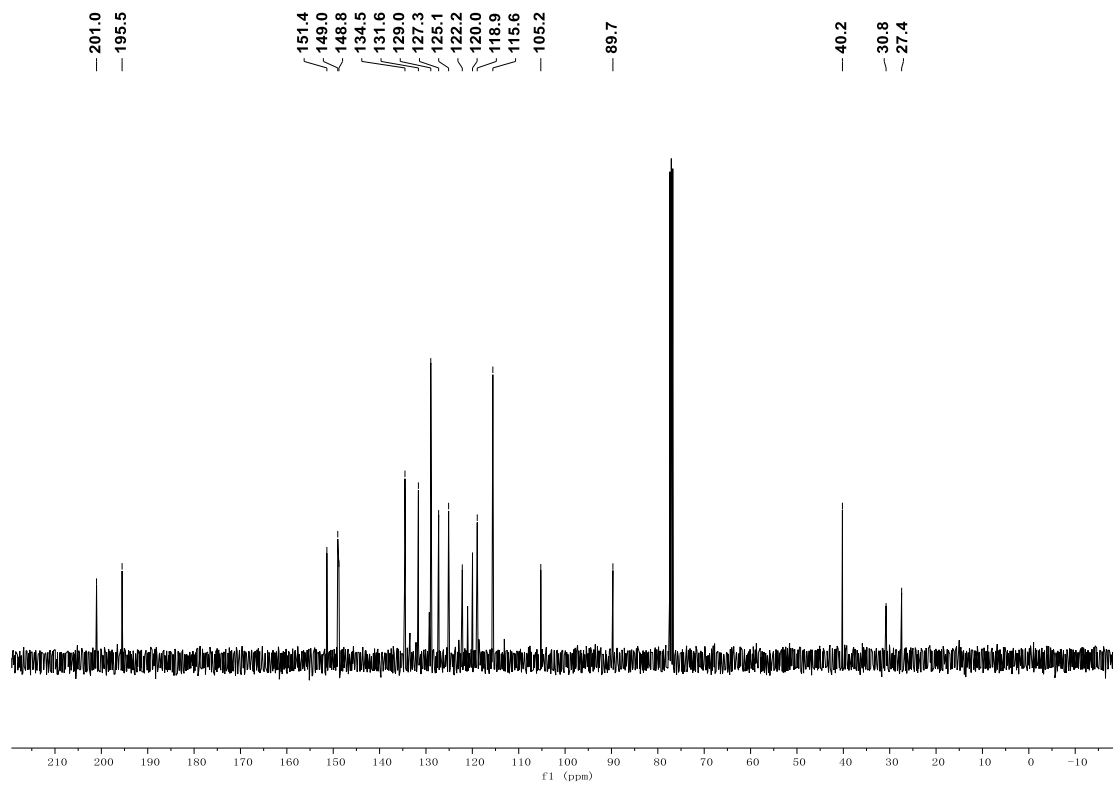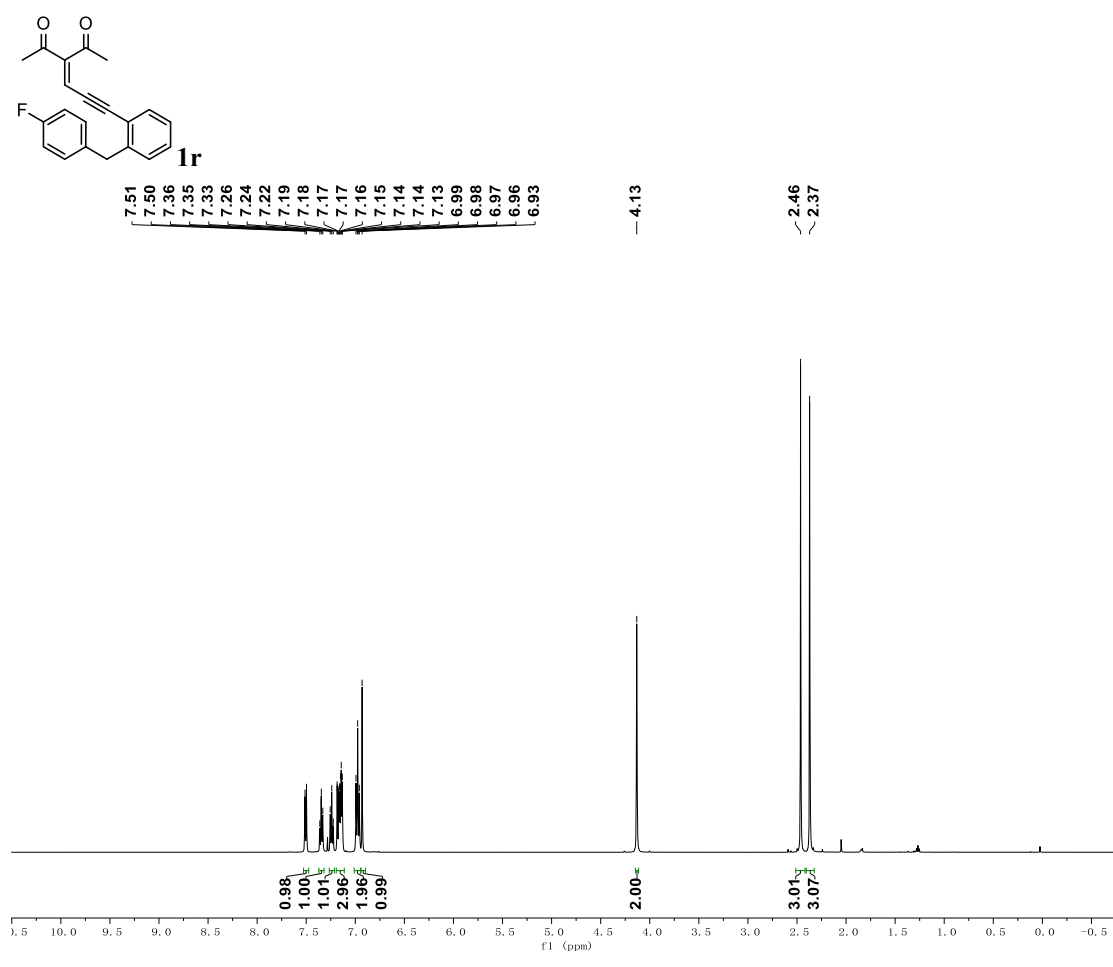

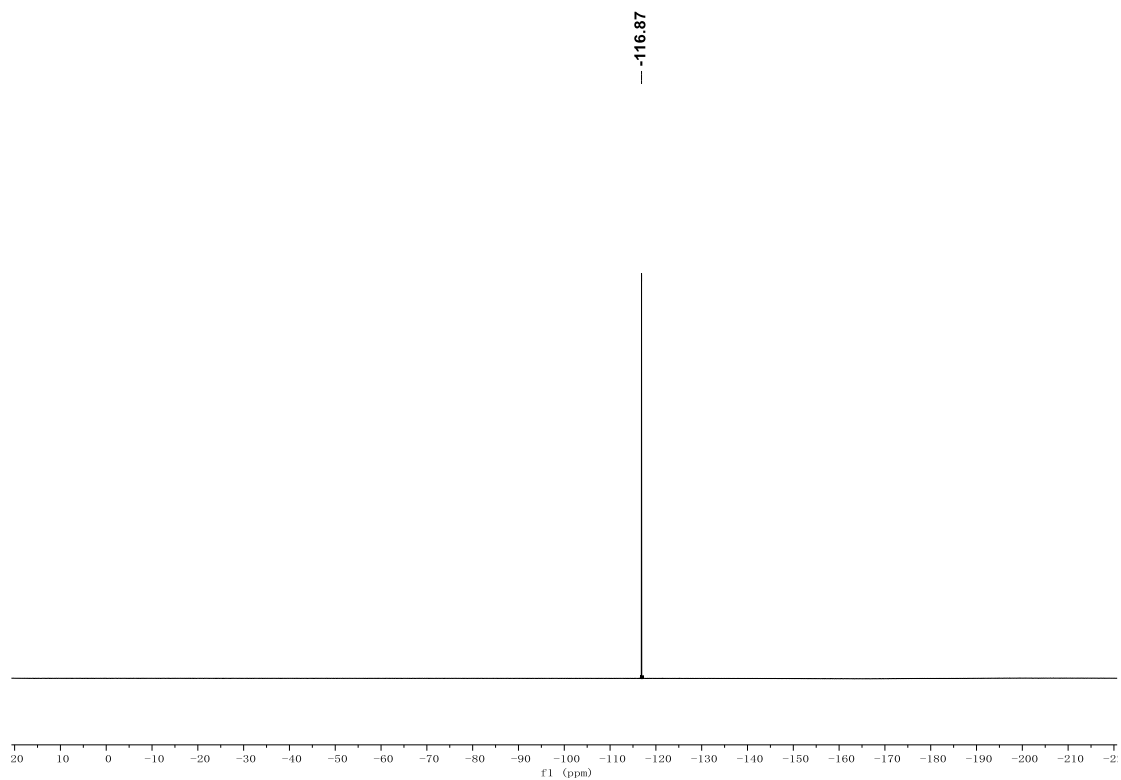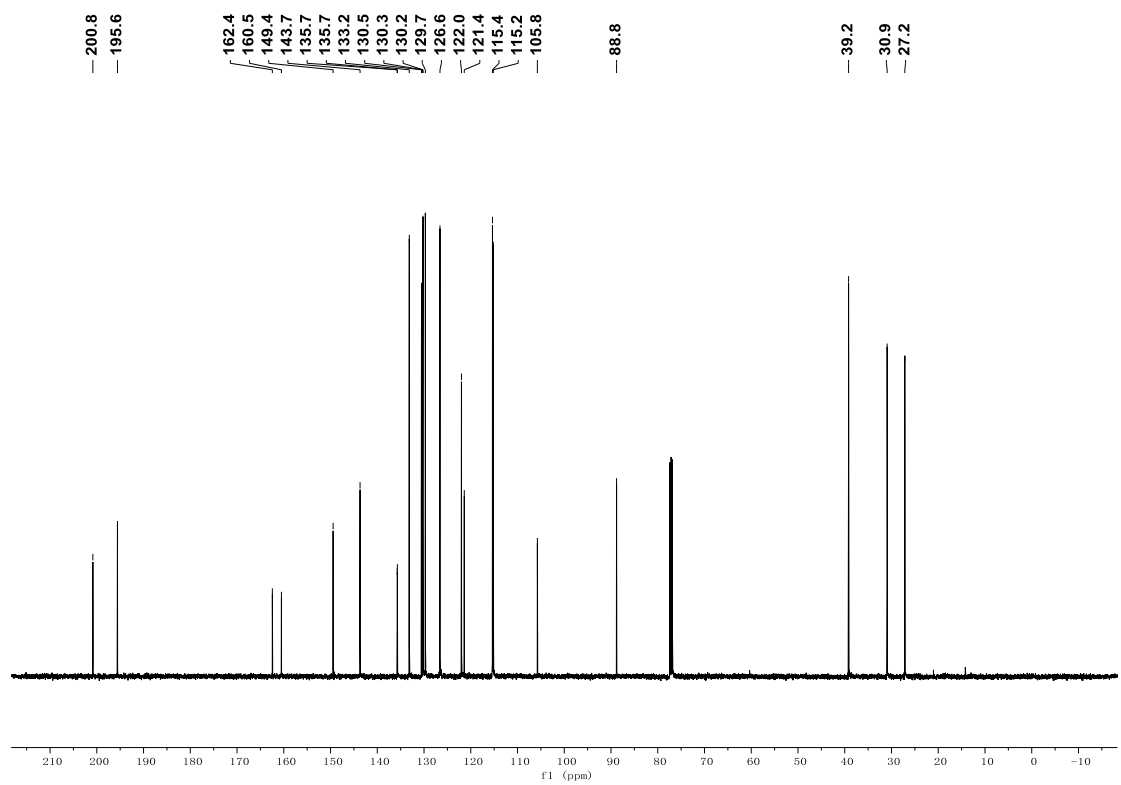

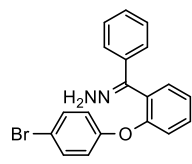

S15a

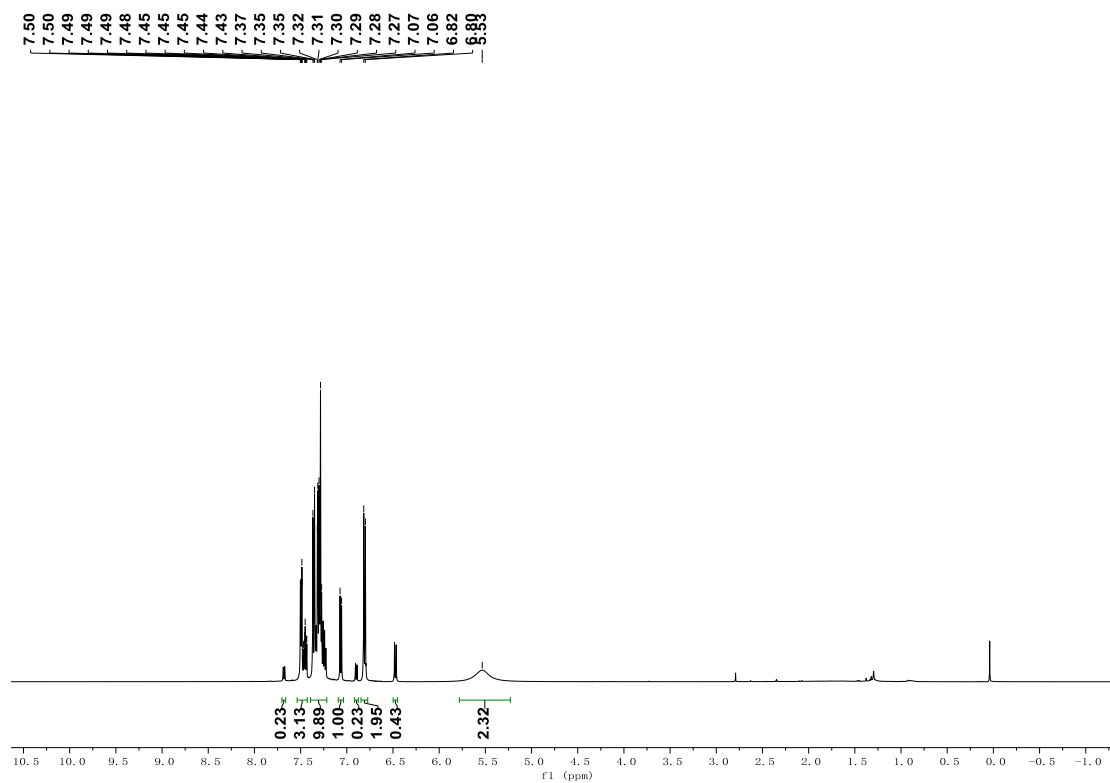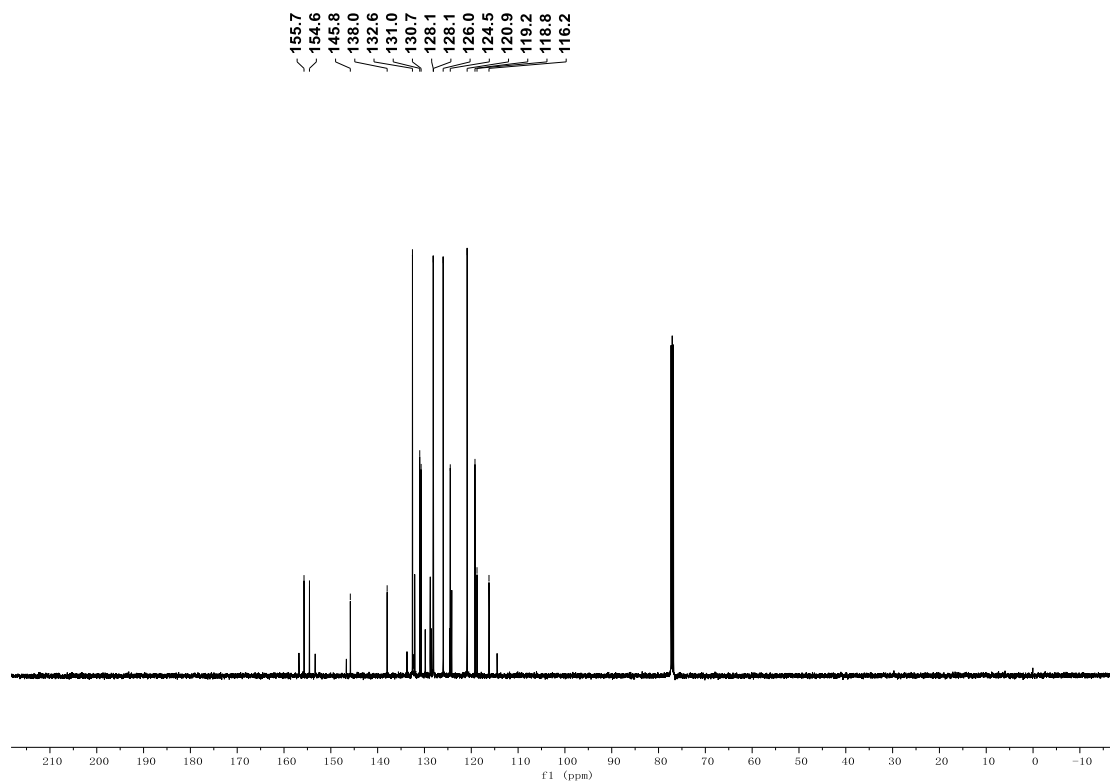

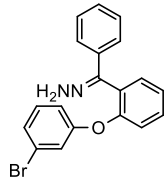

**S15b**

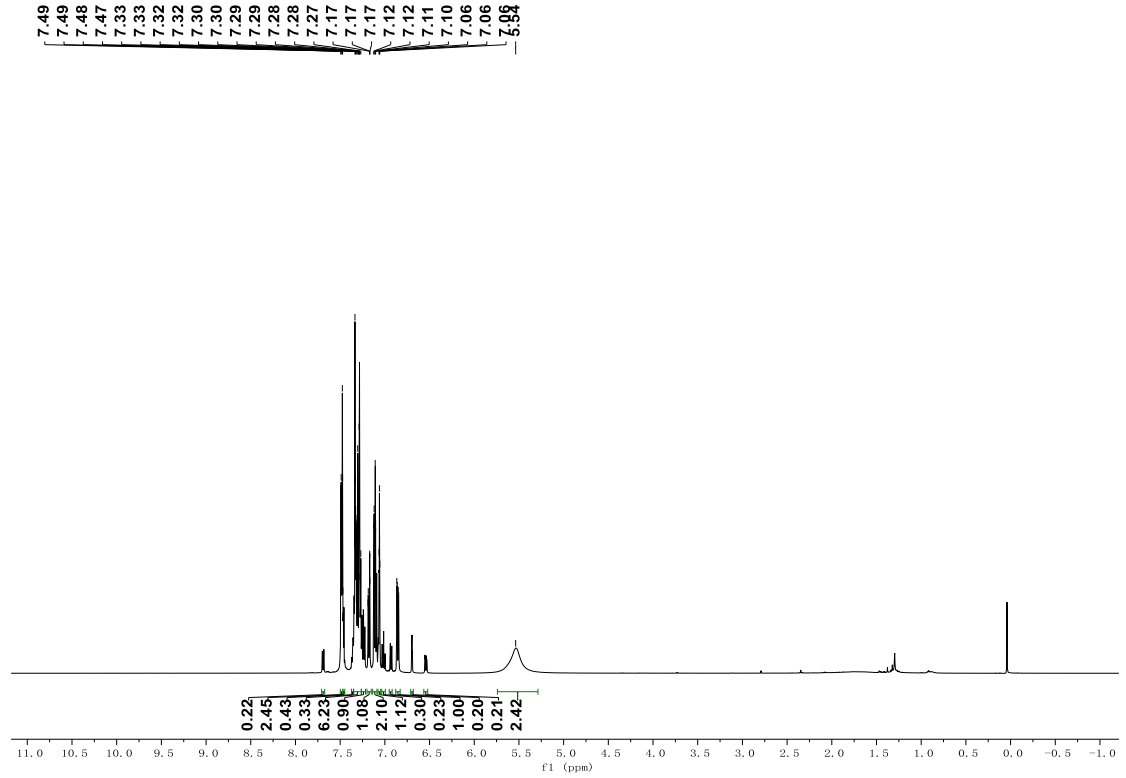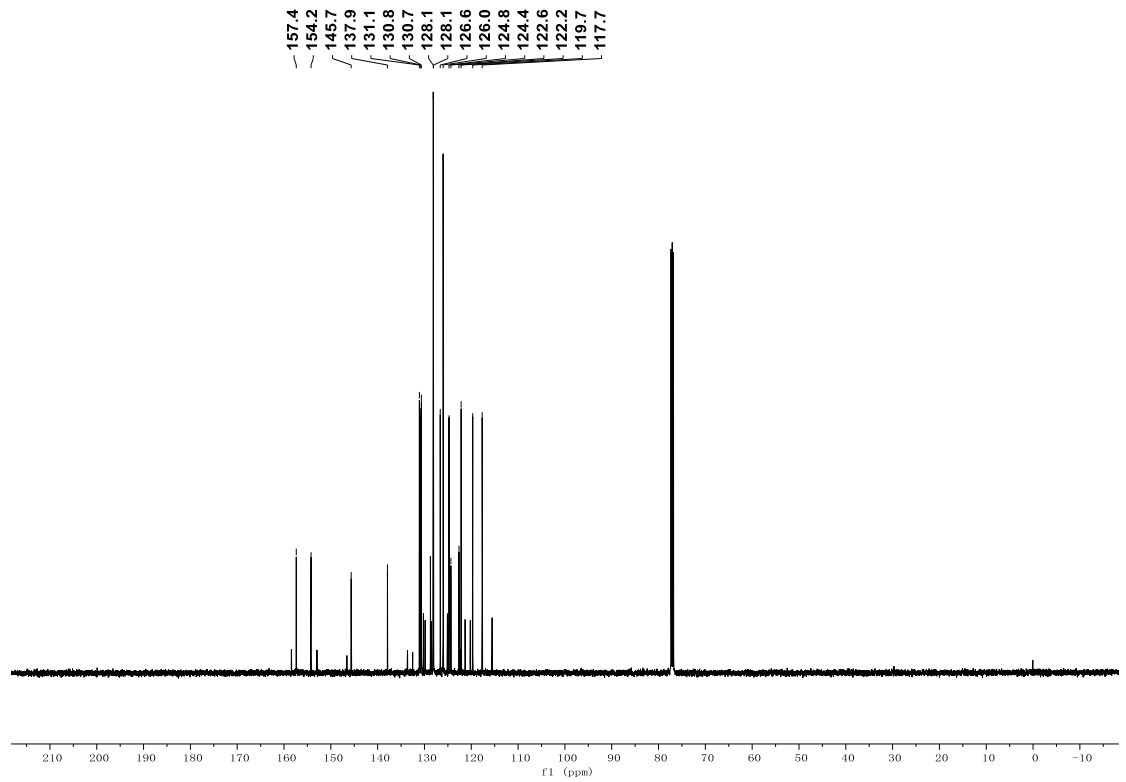

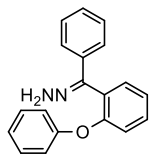

**S15c**

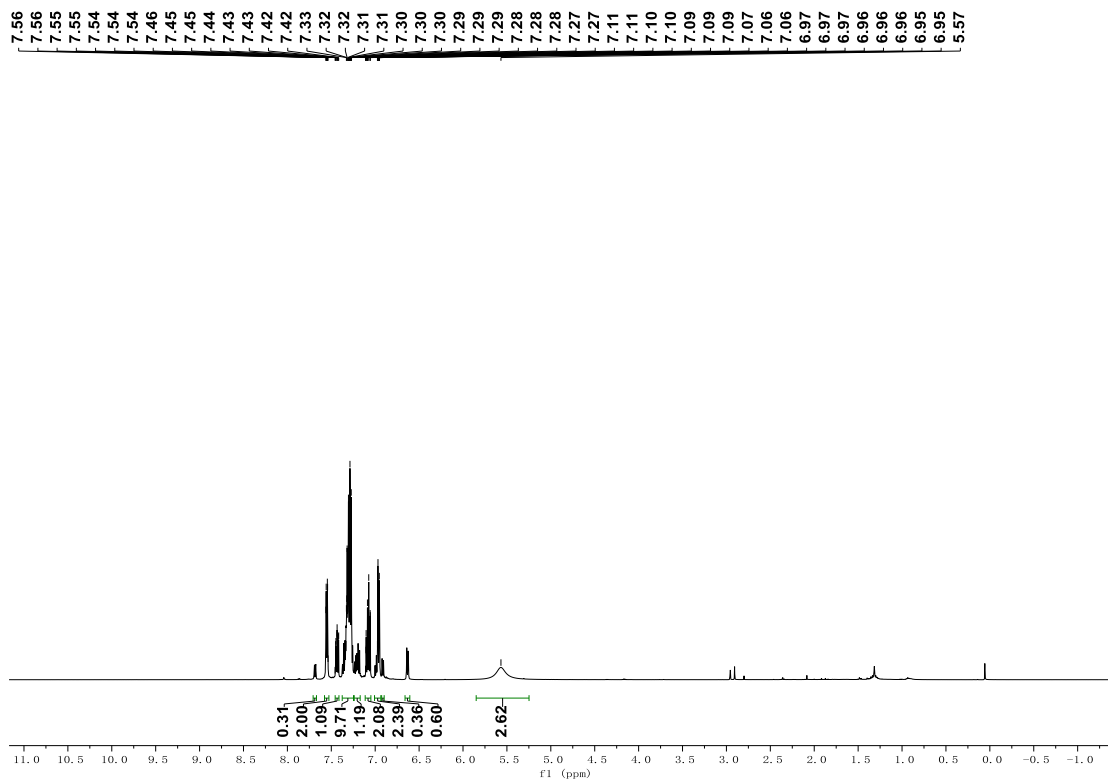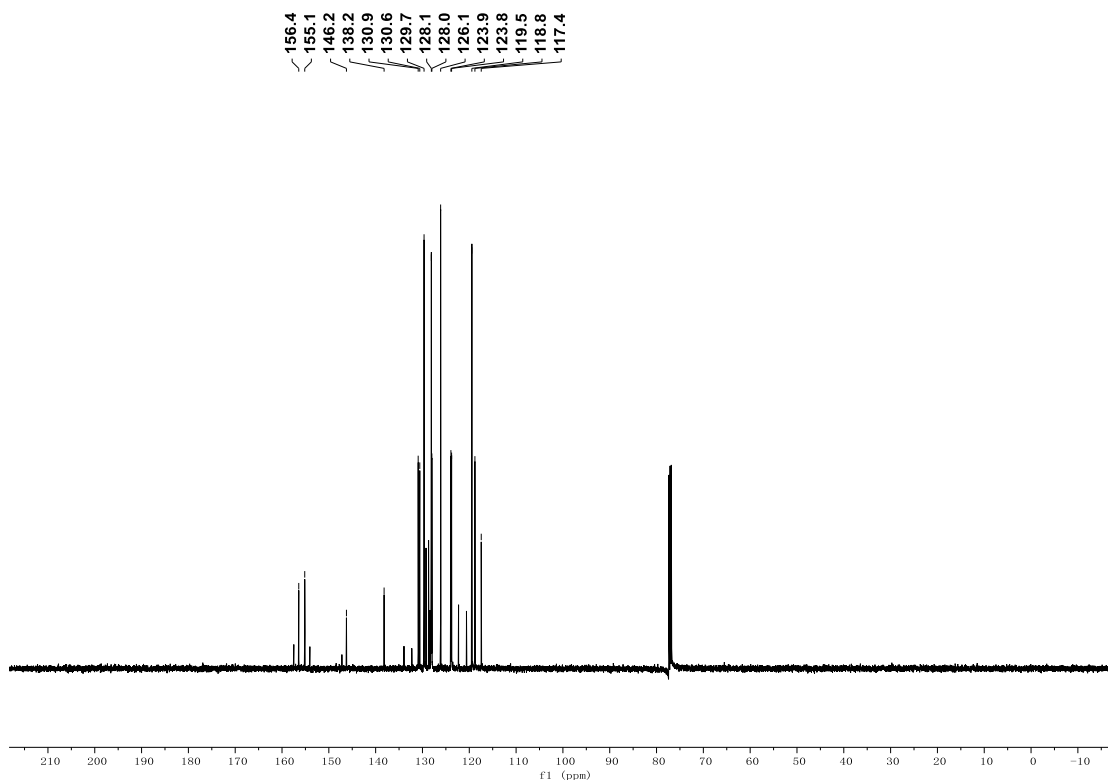



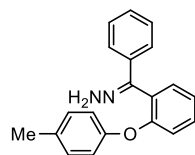

**S15d**

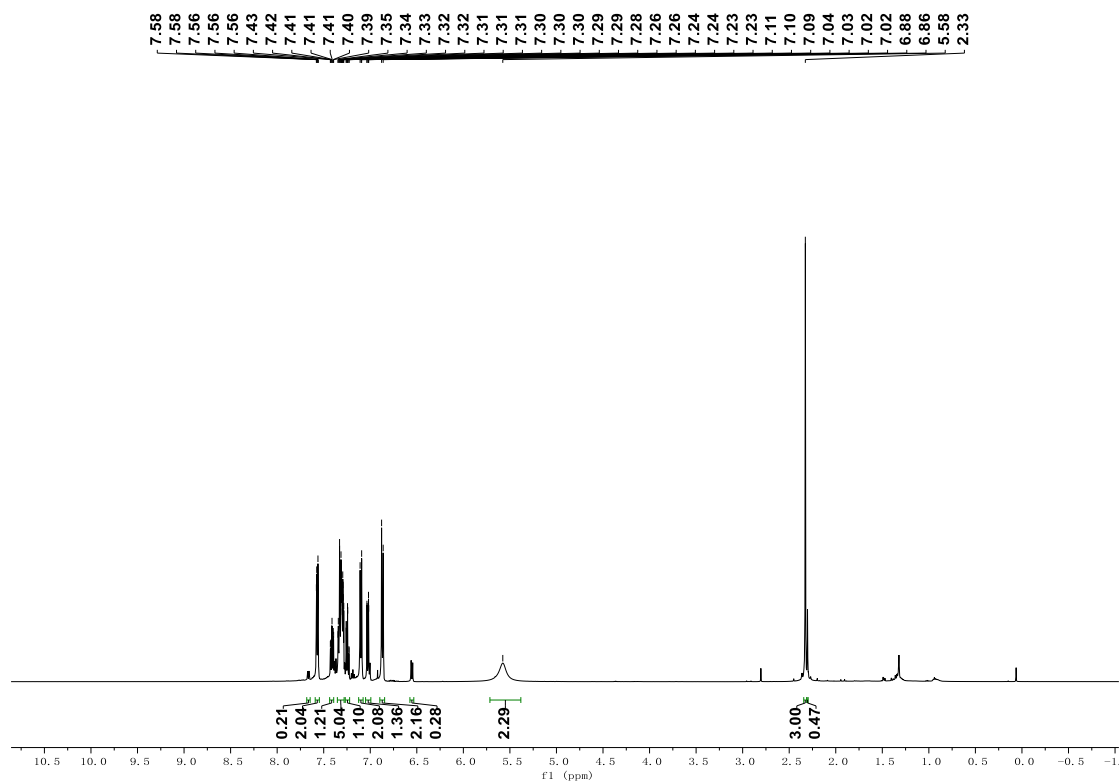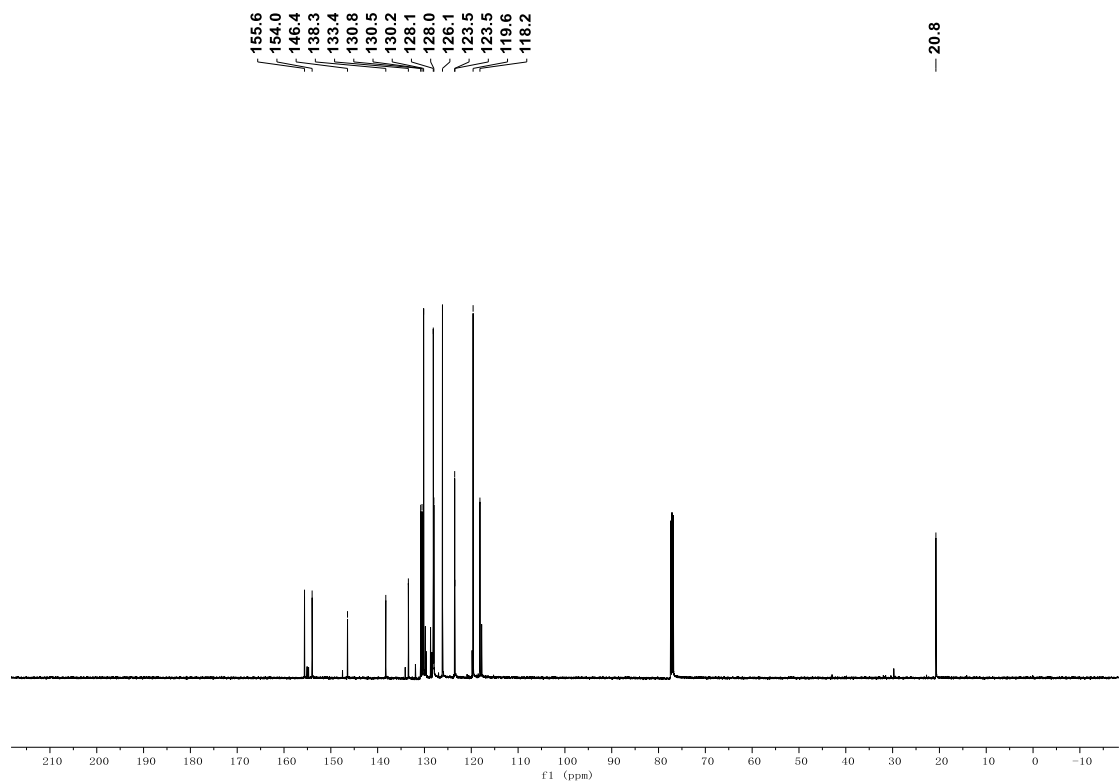

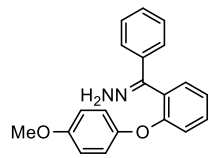

S15e

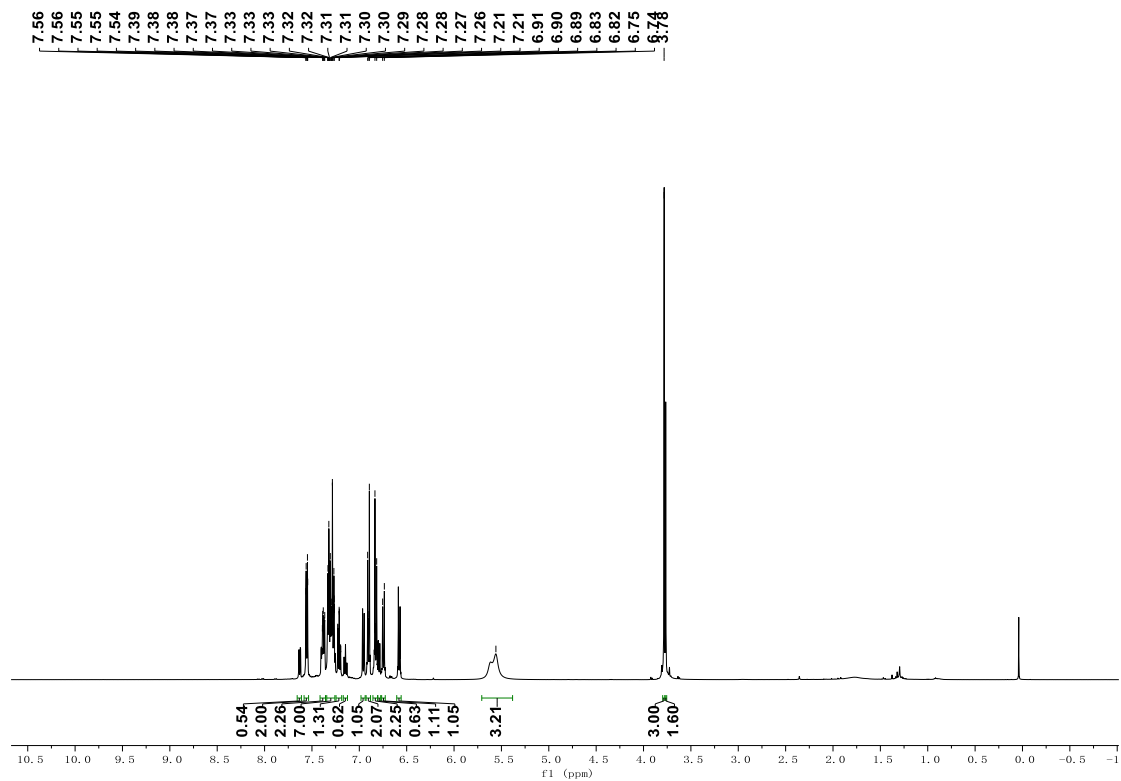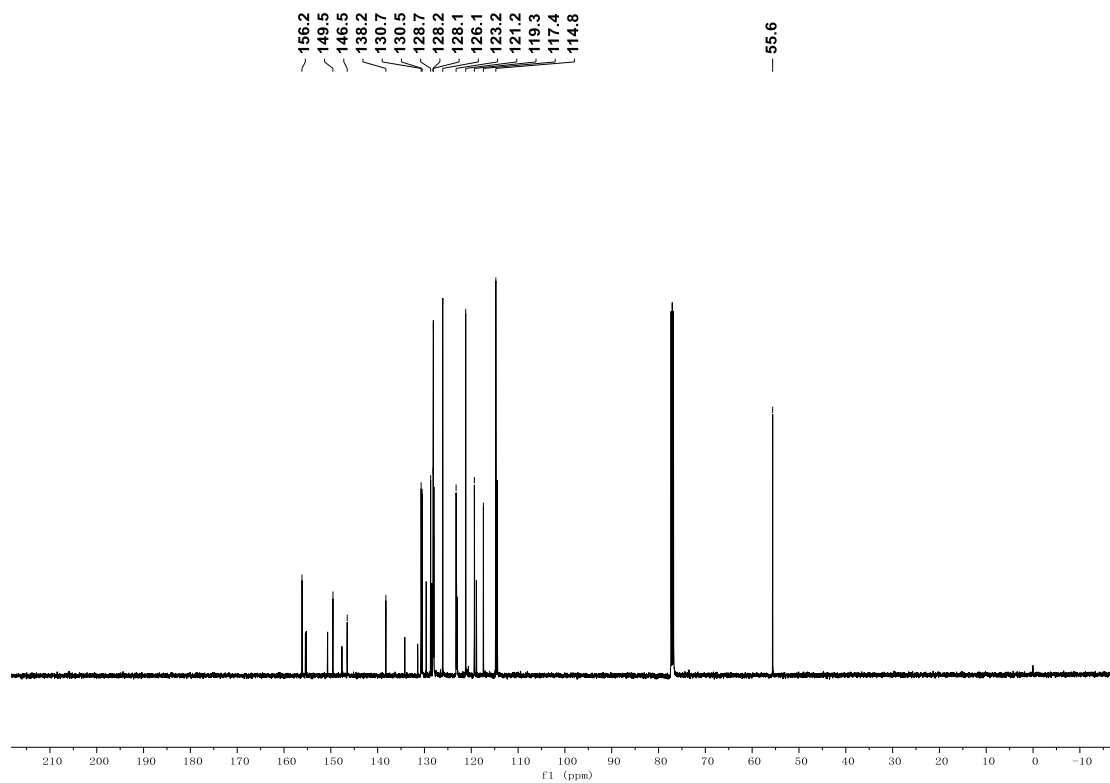

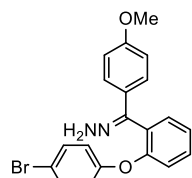

S15f

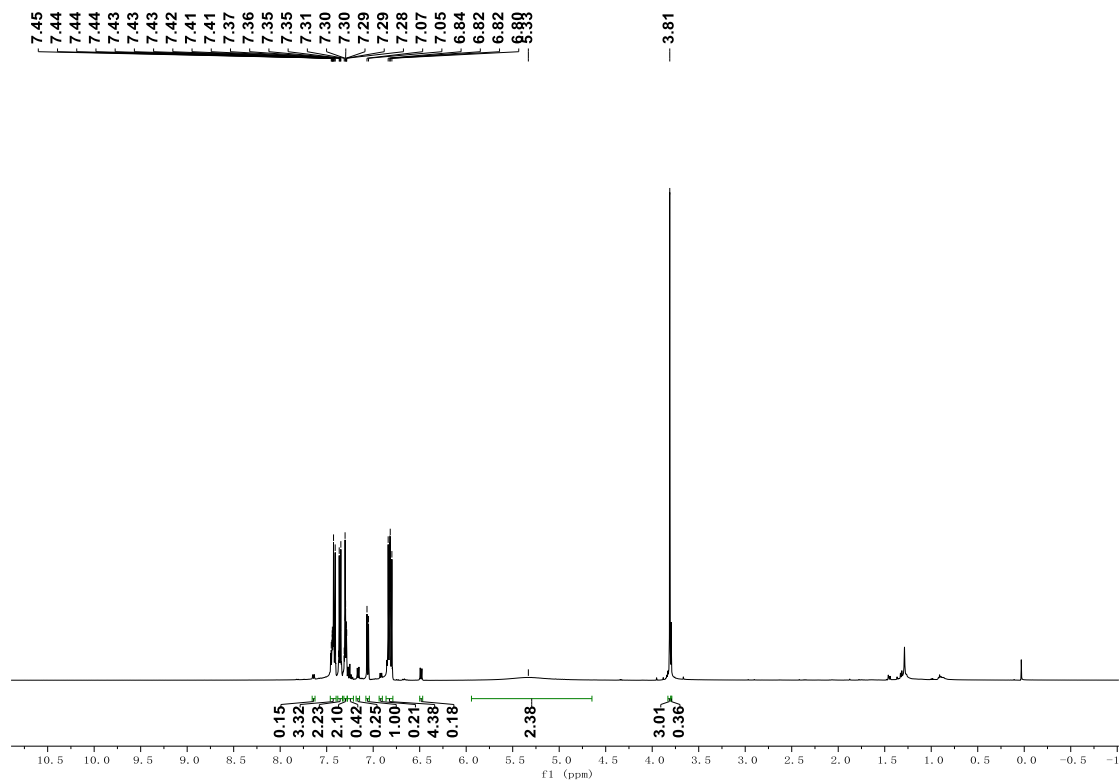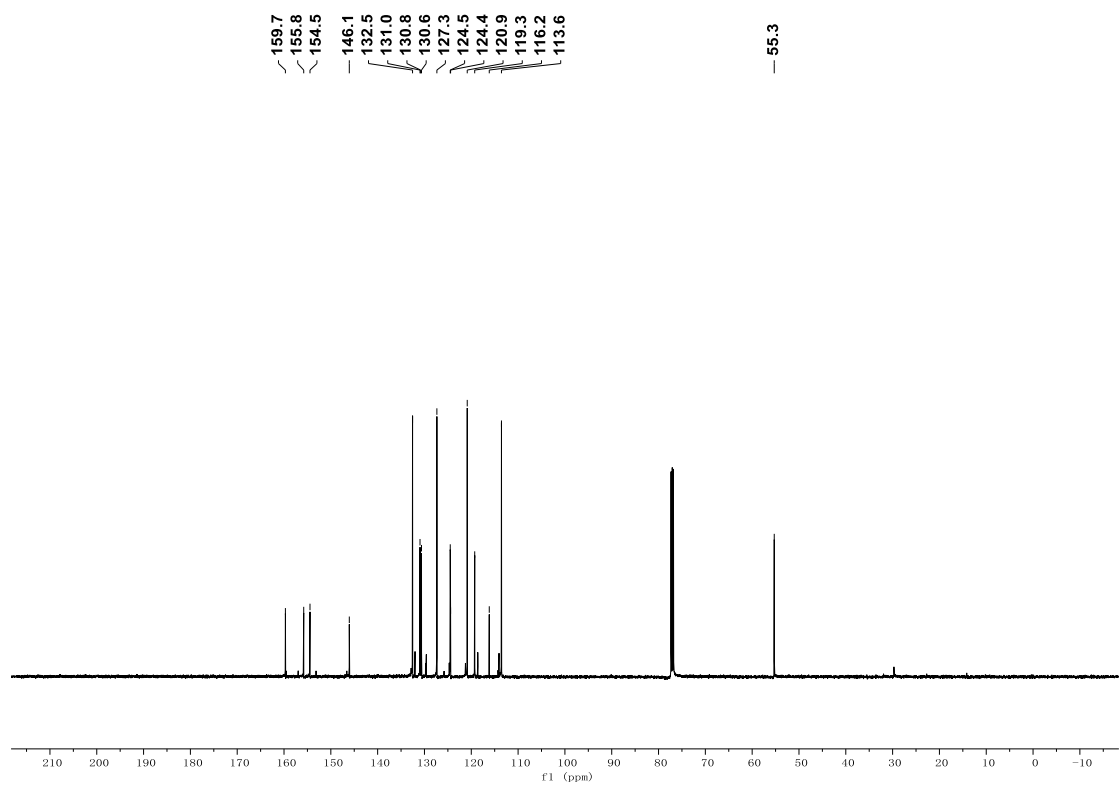

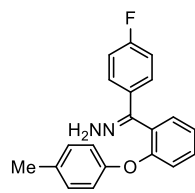

**S15g**

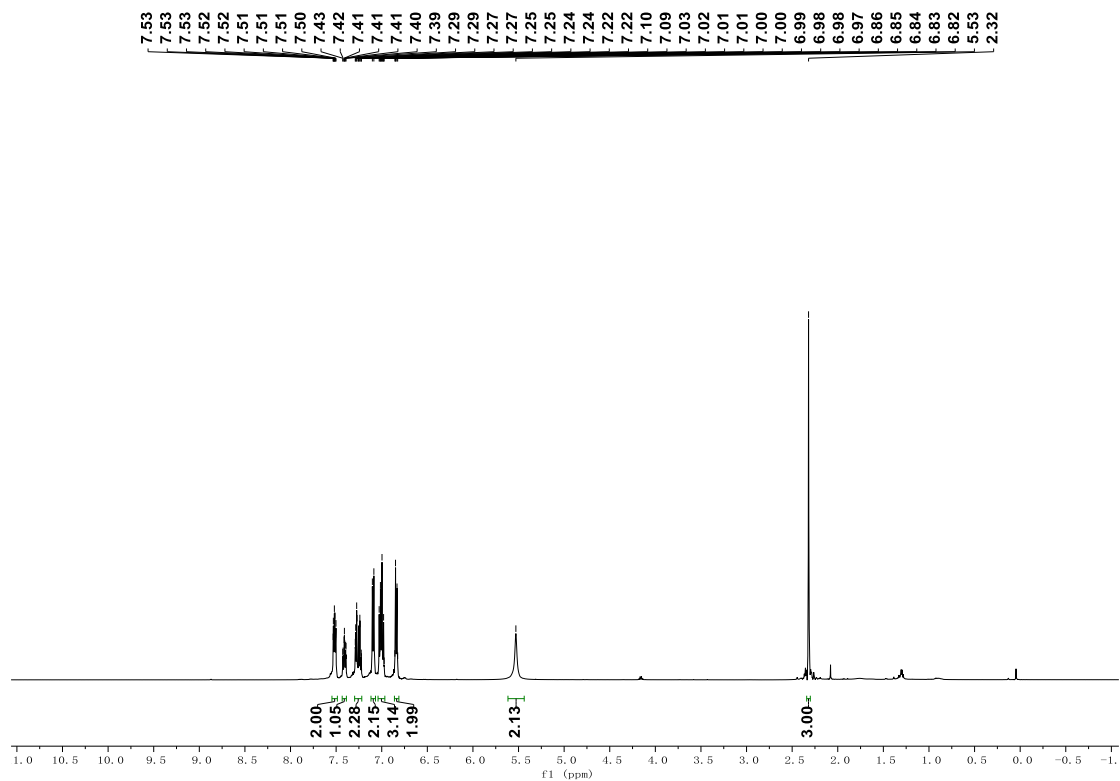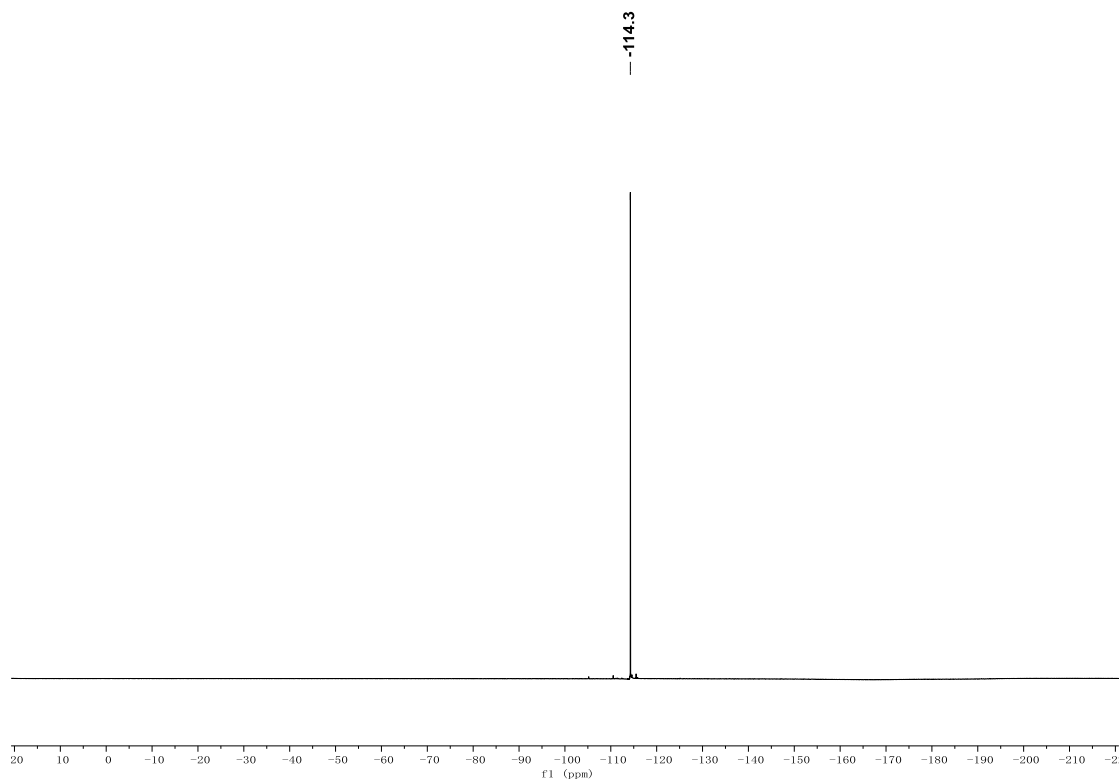

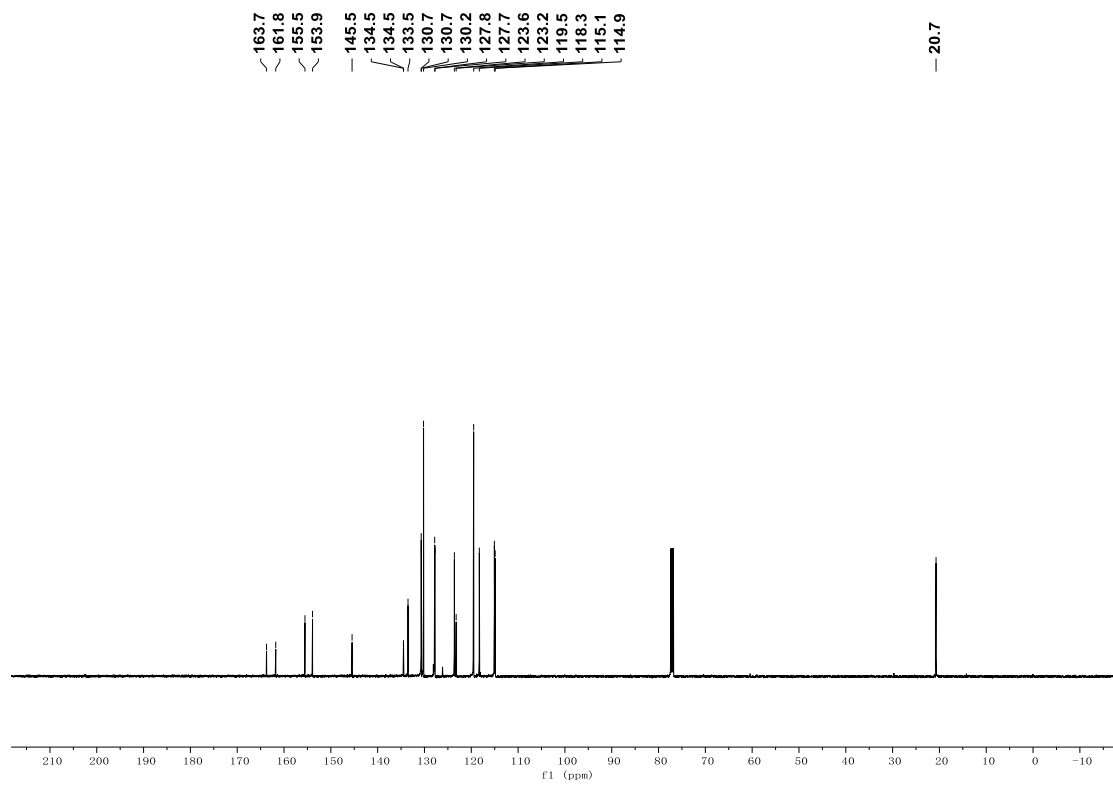

— 20.7

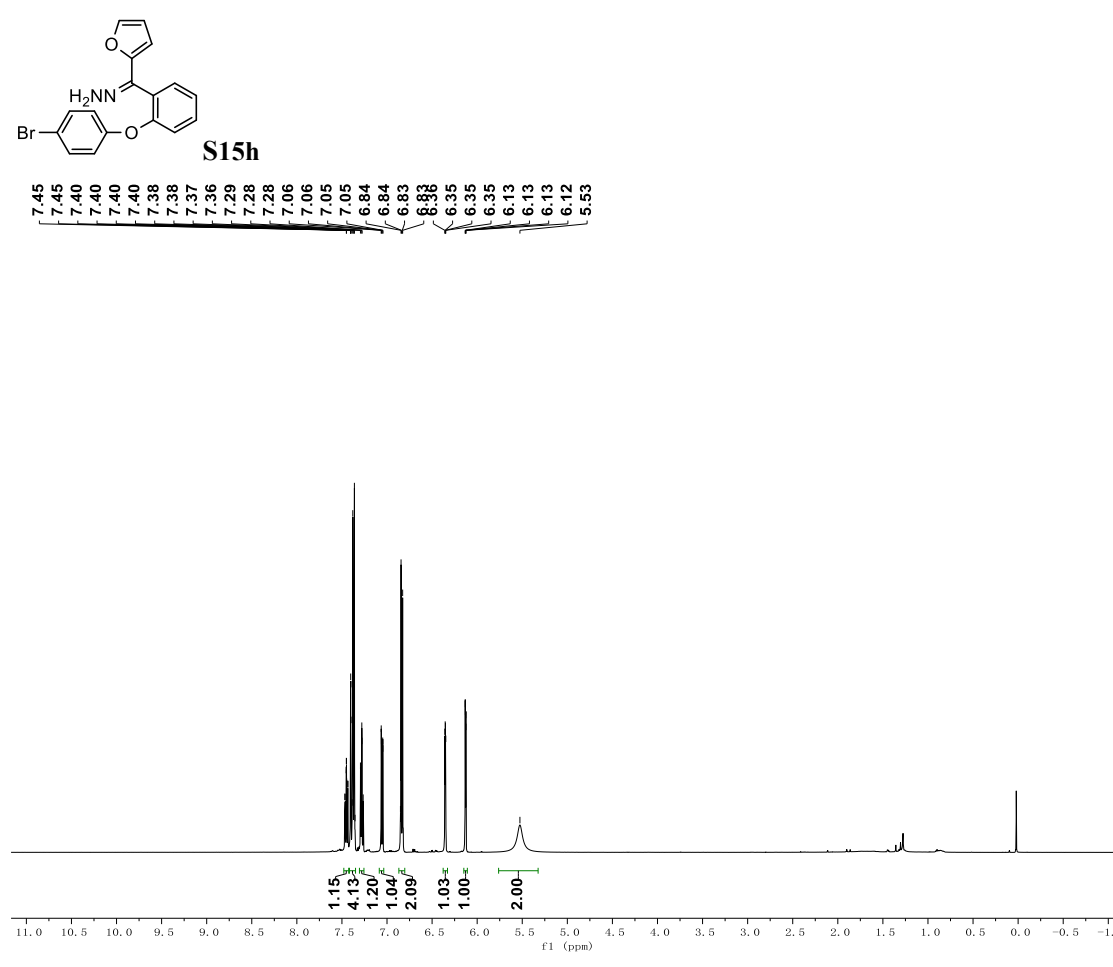

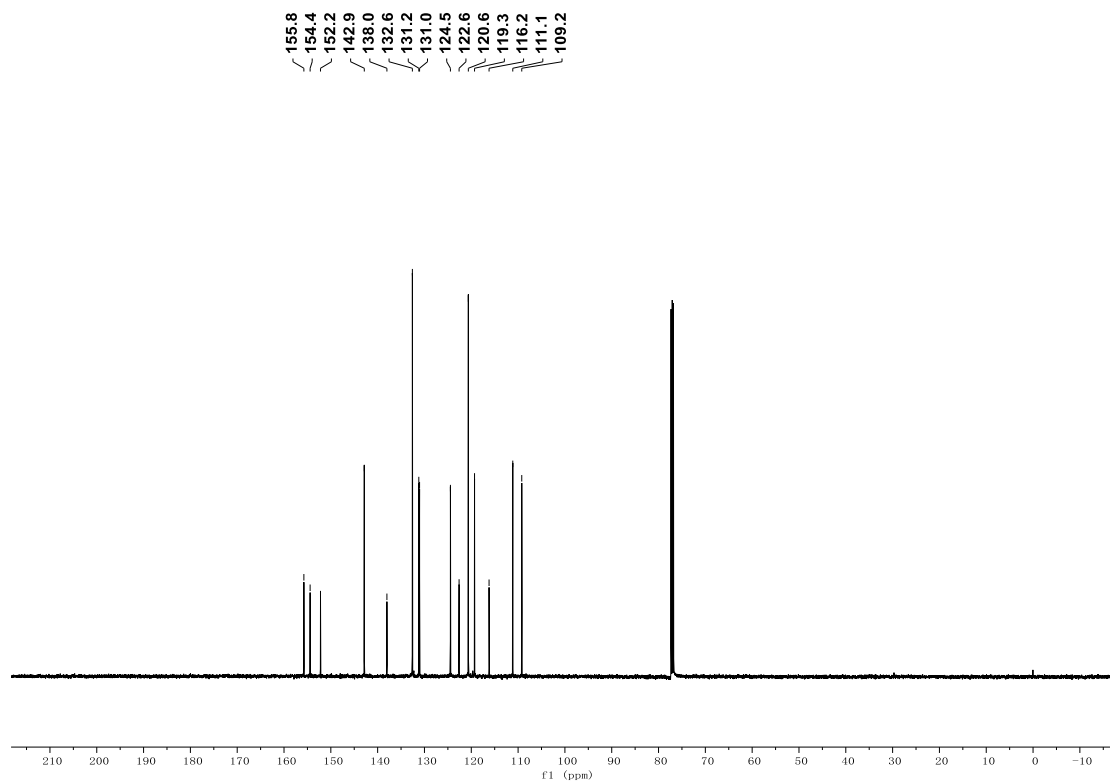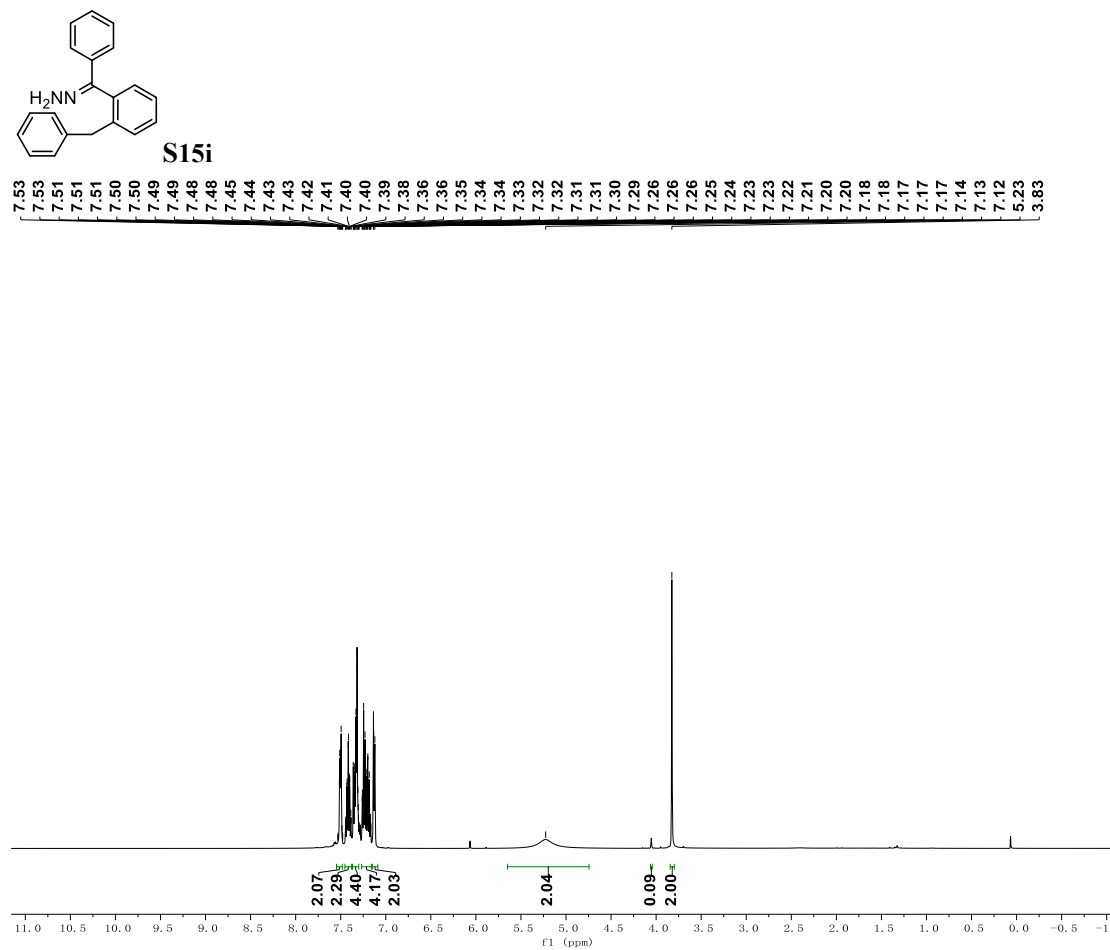

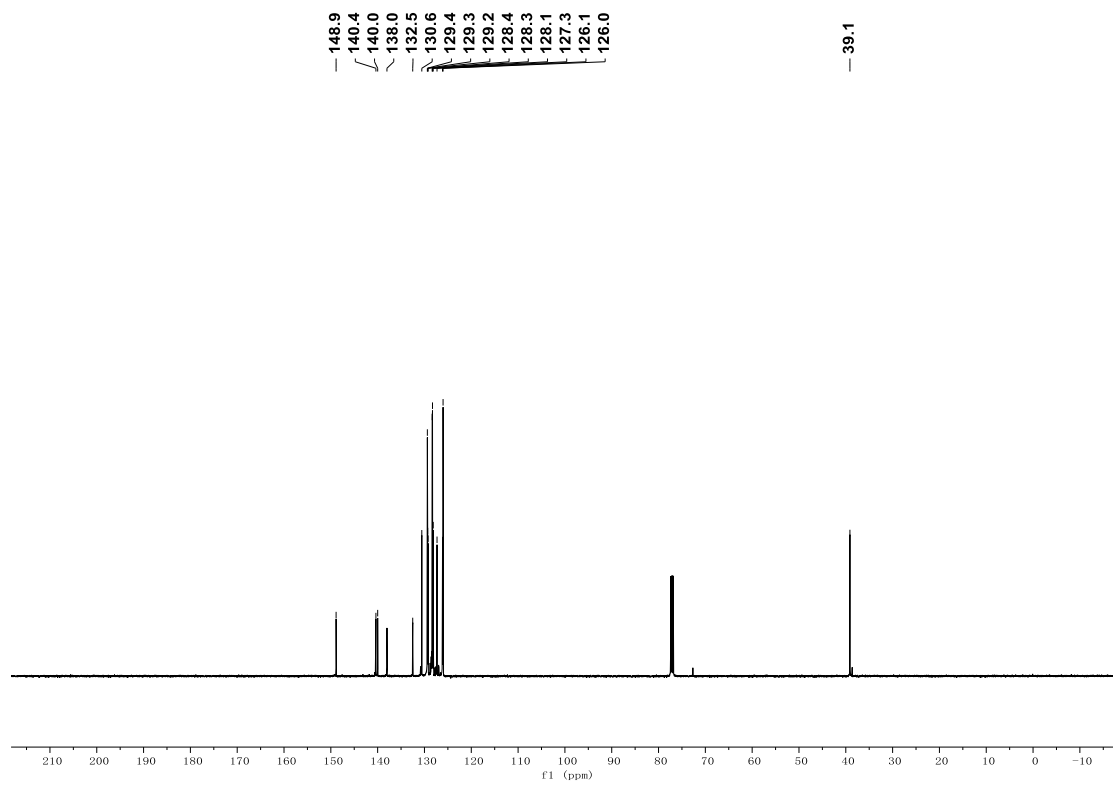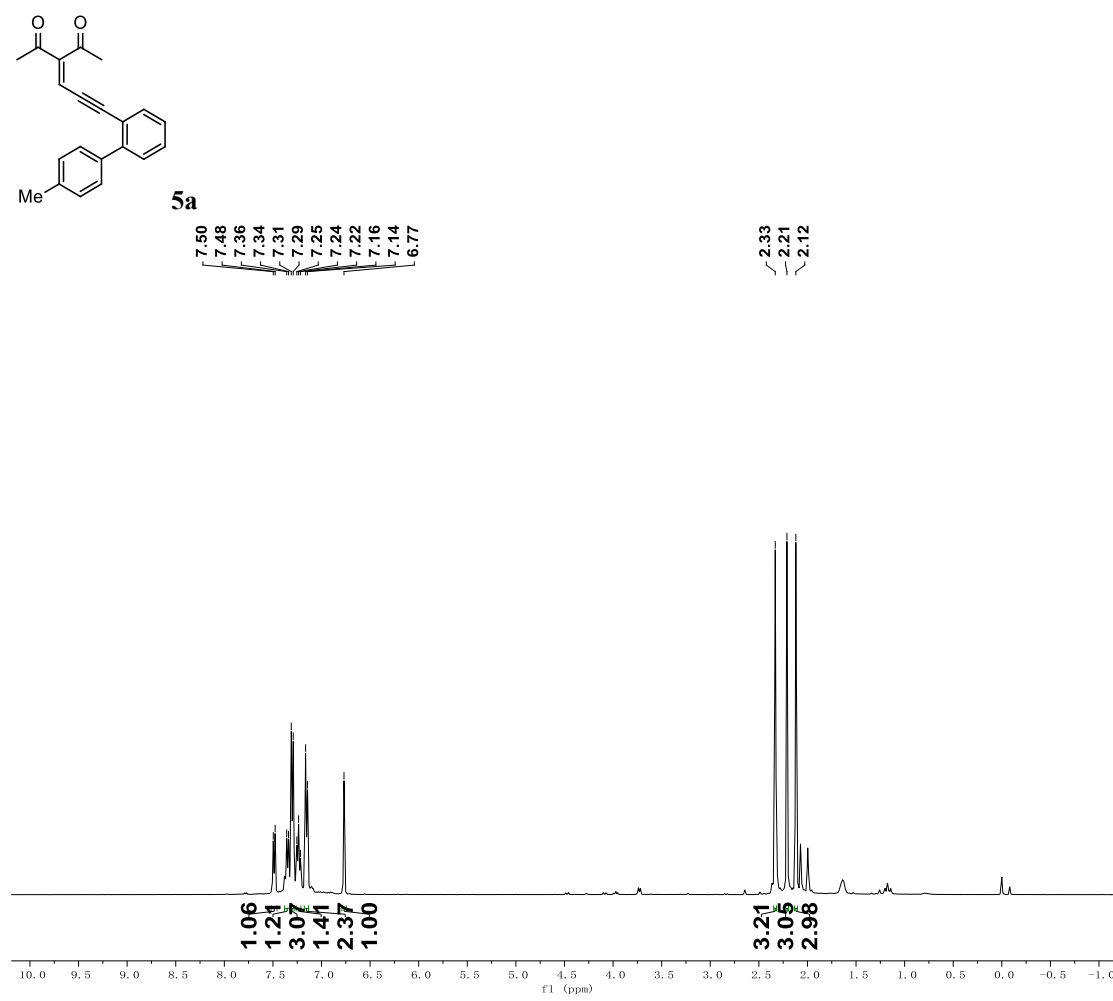

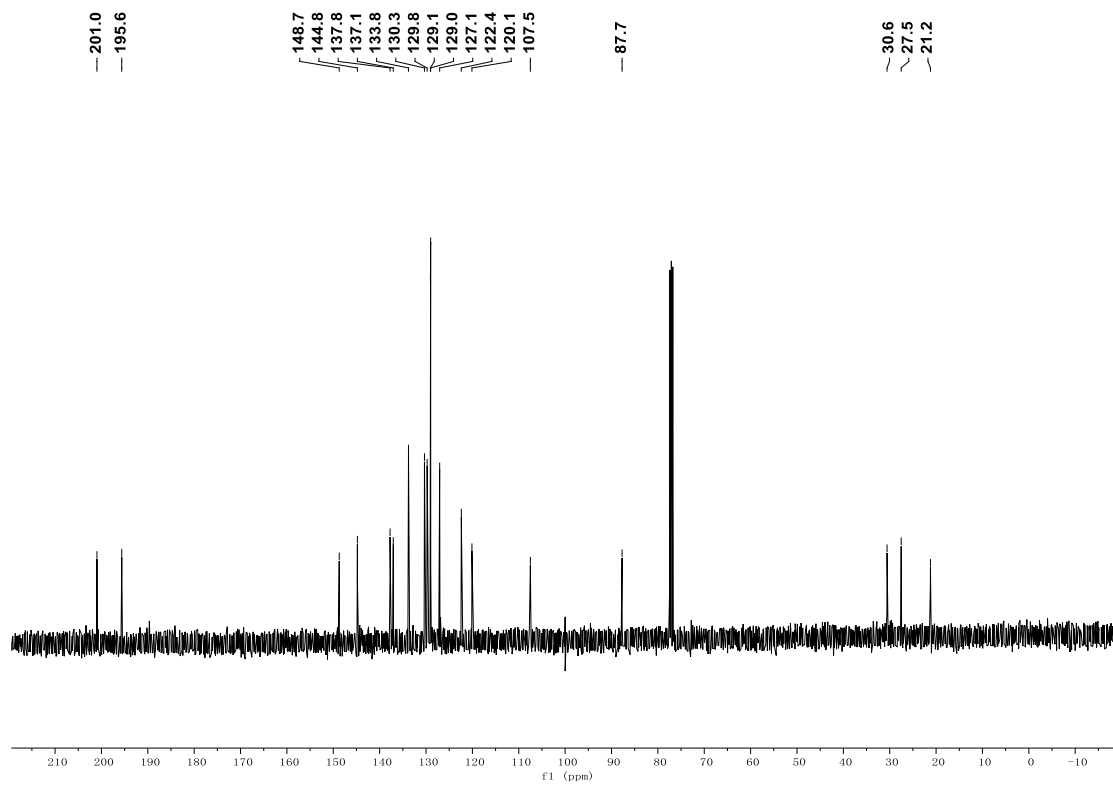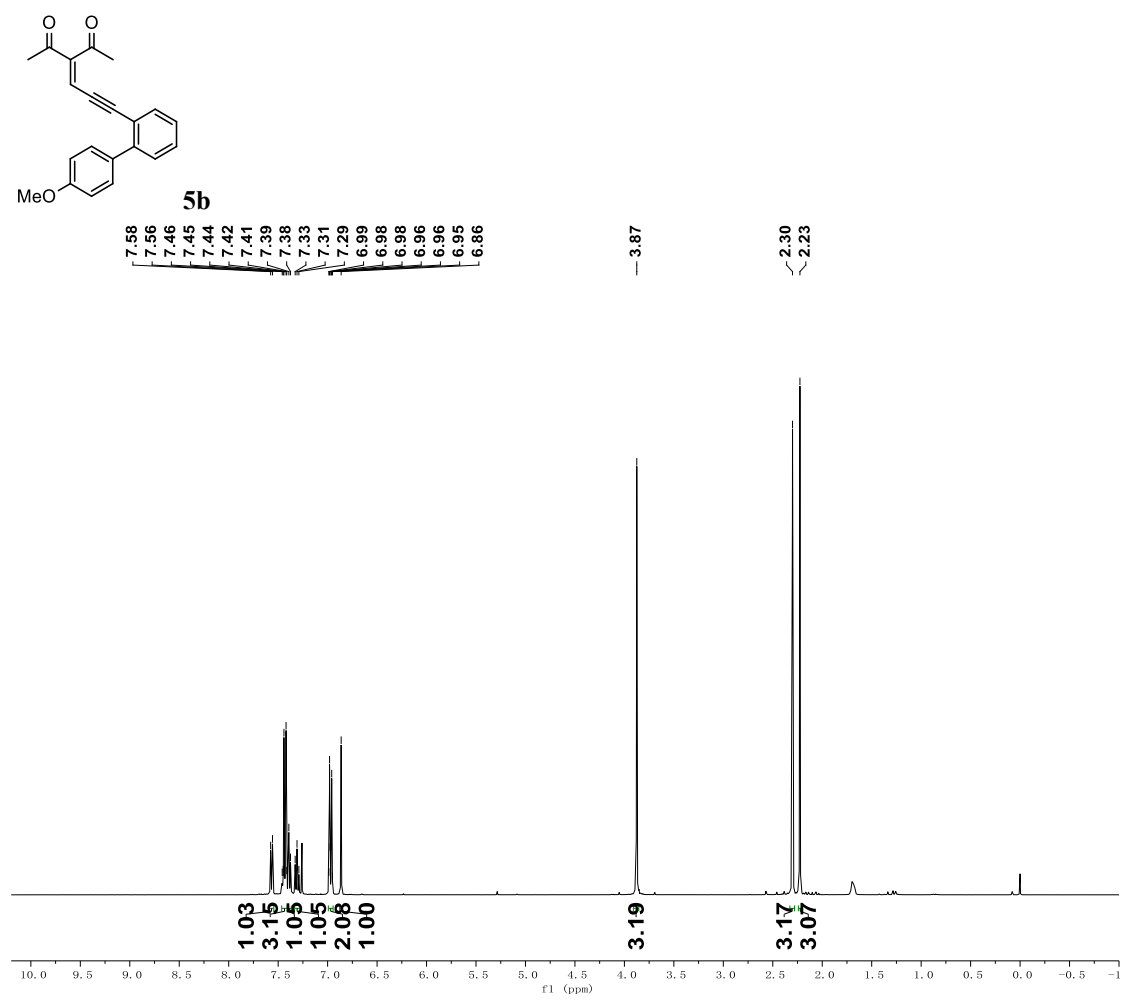



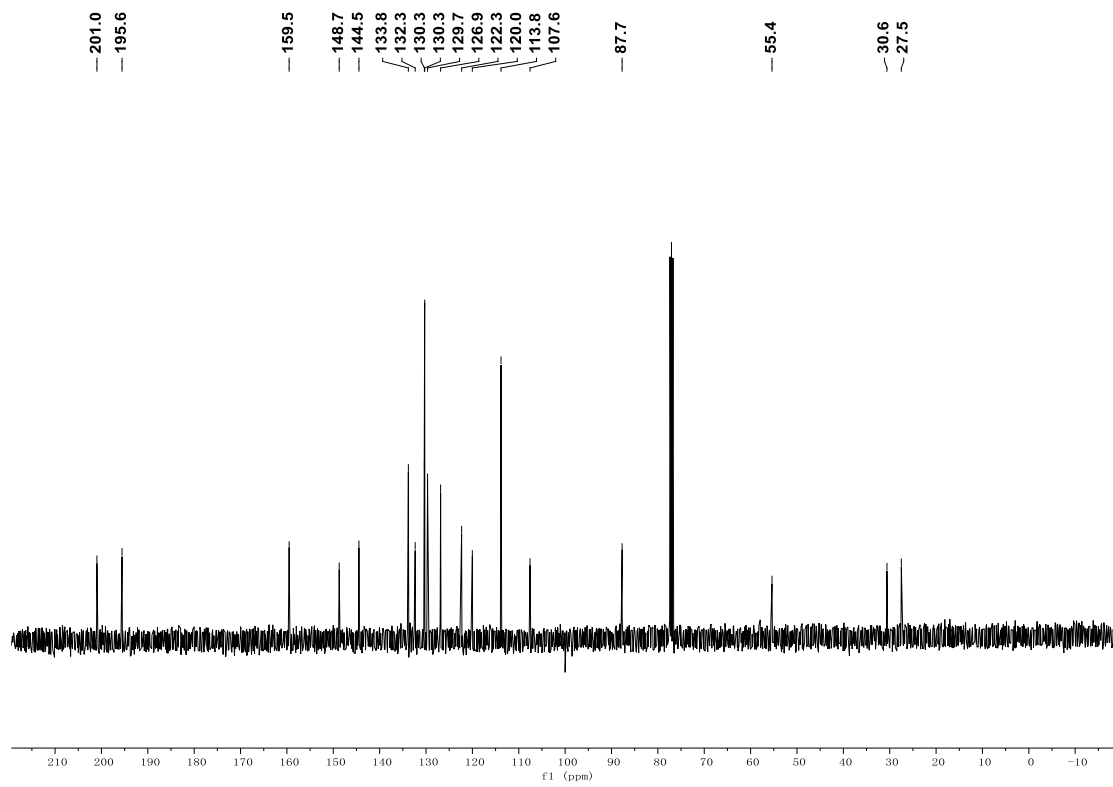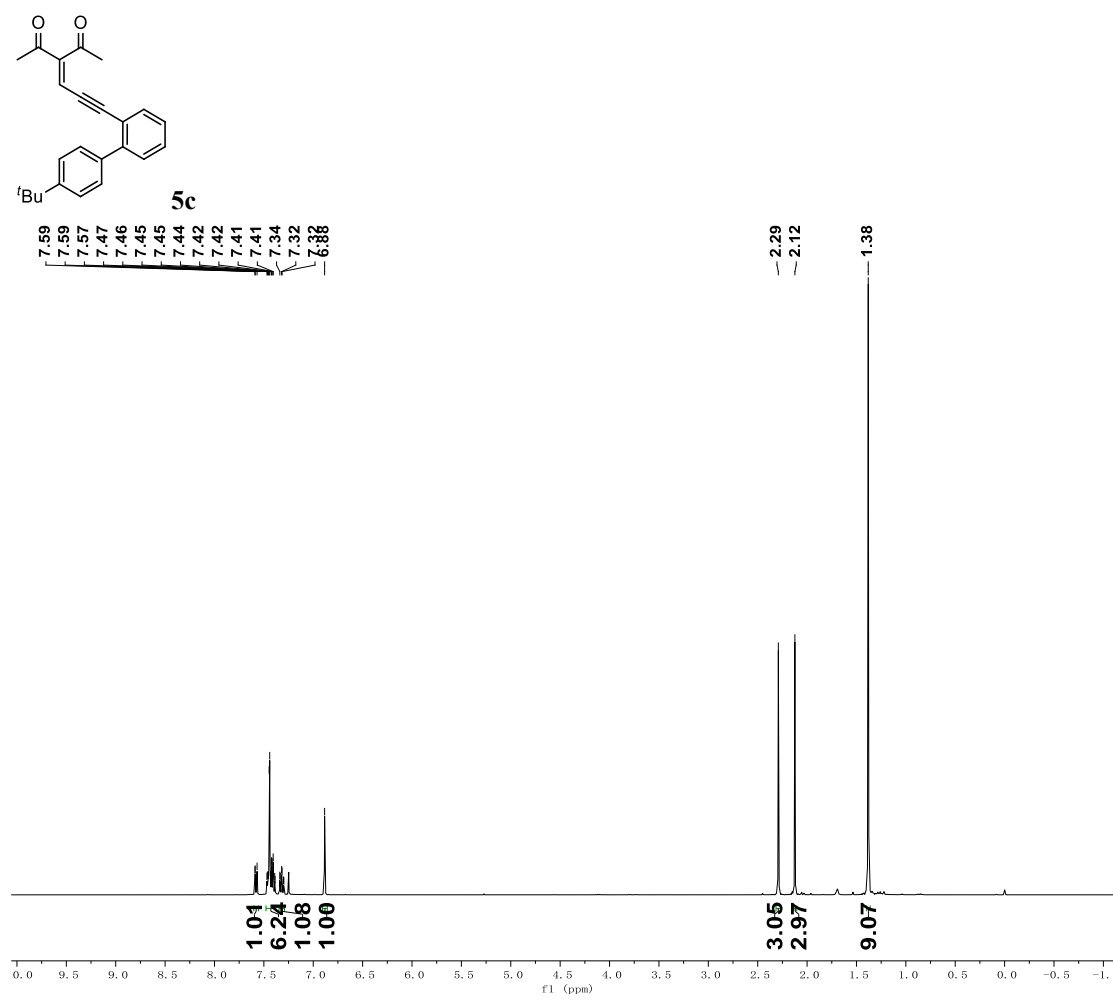

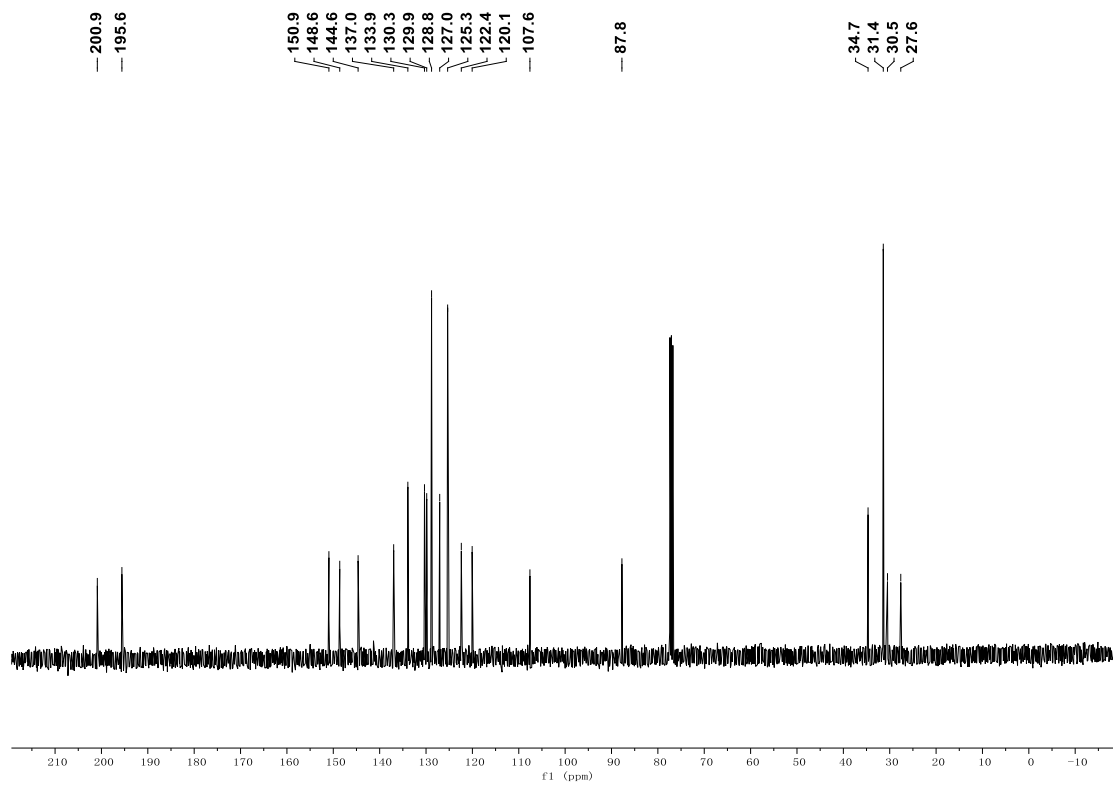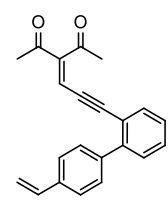

5d

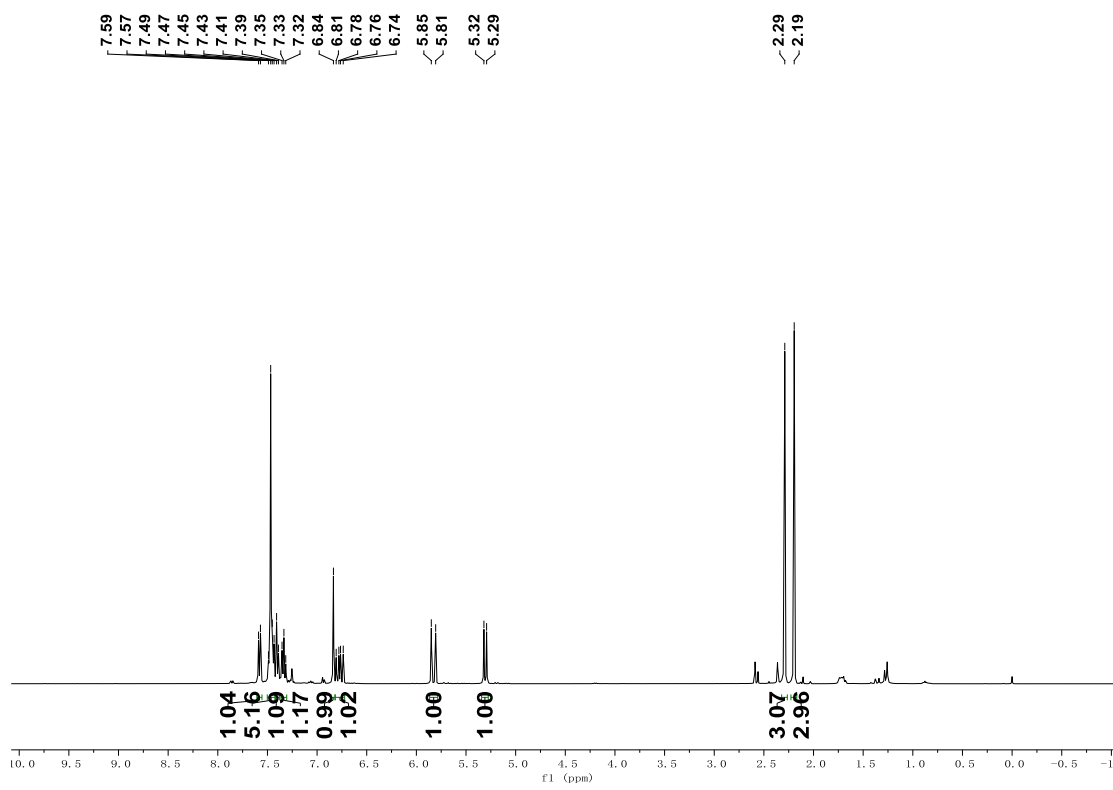

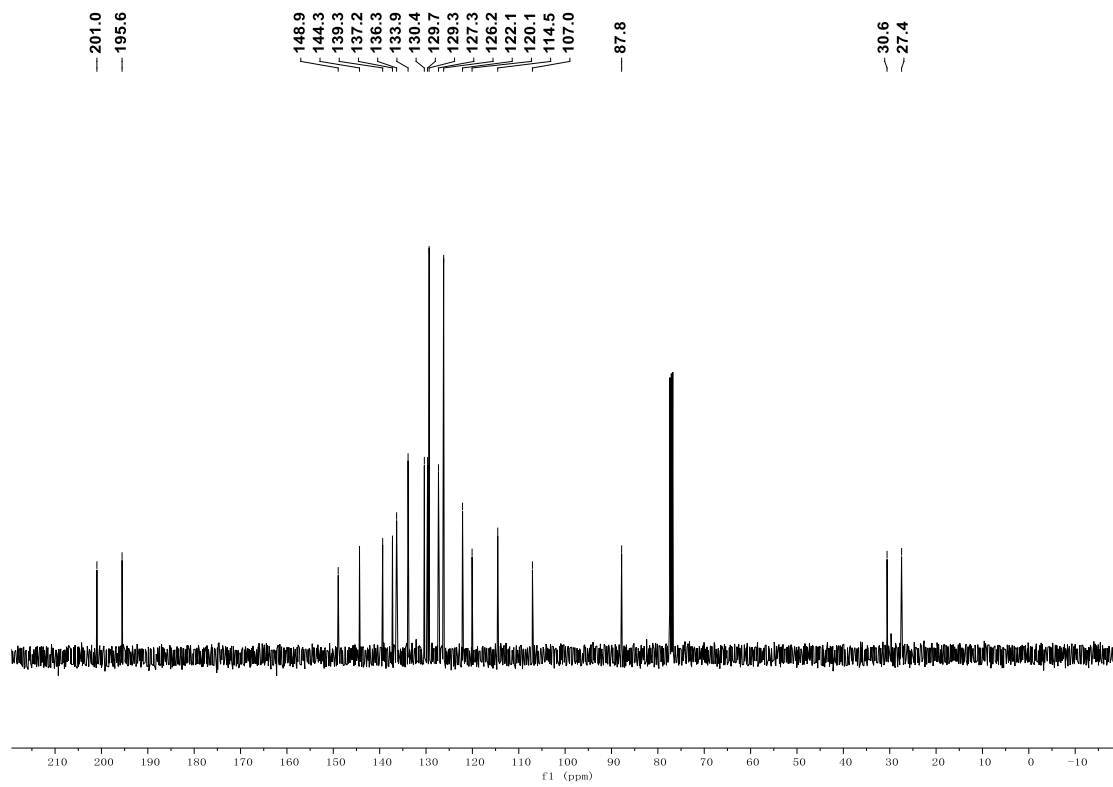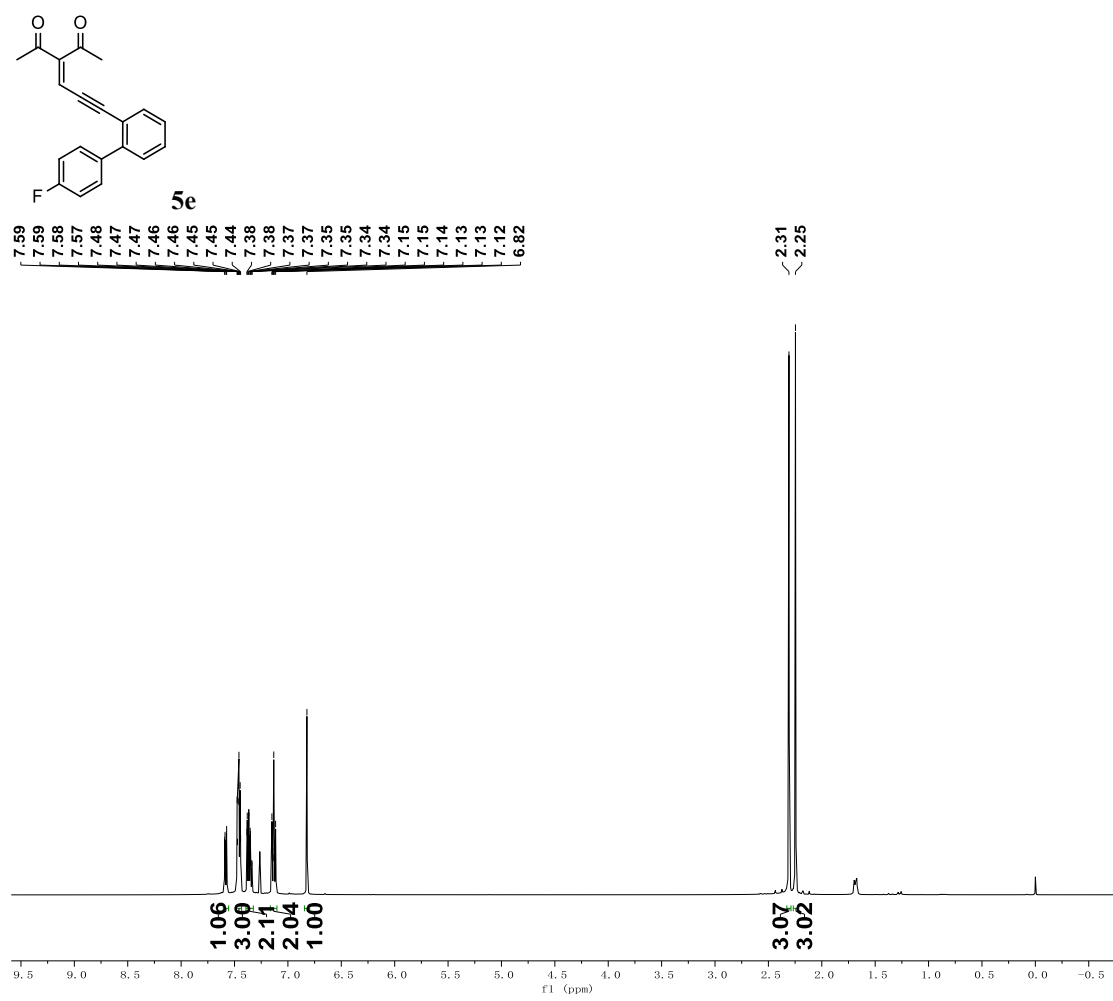

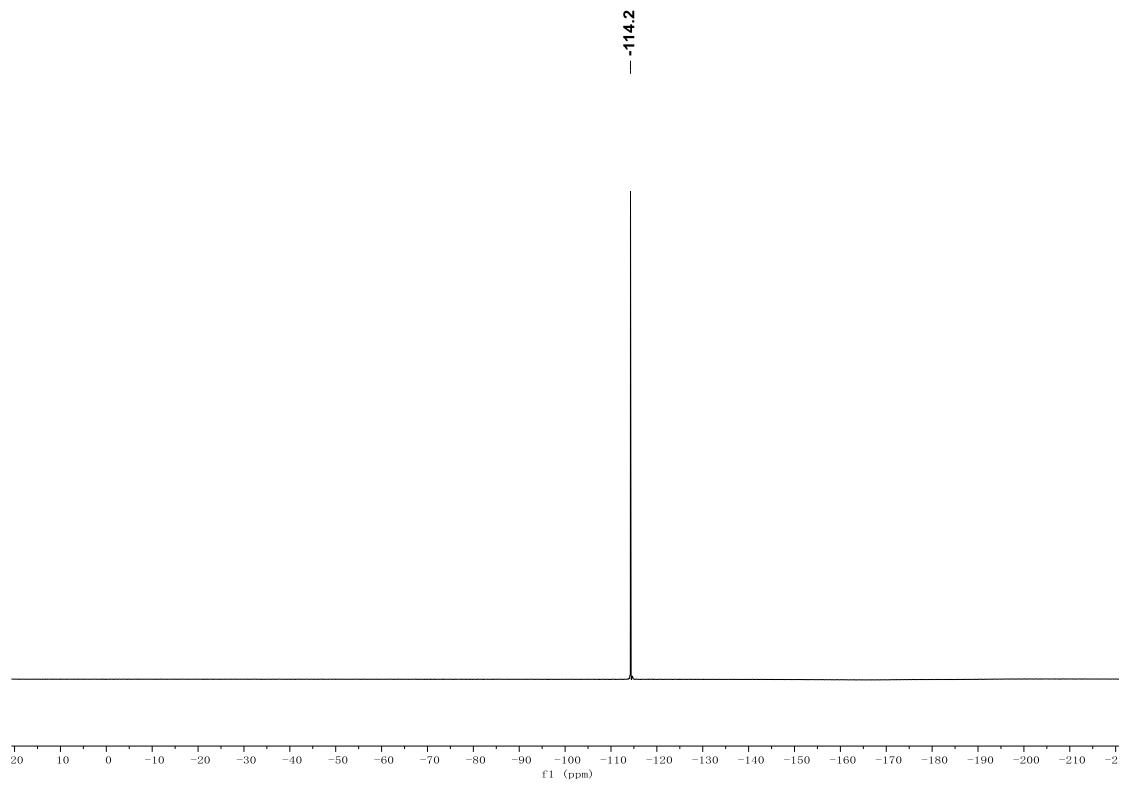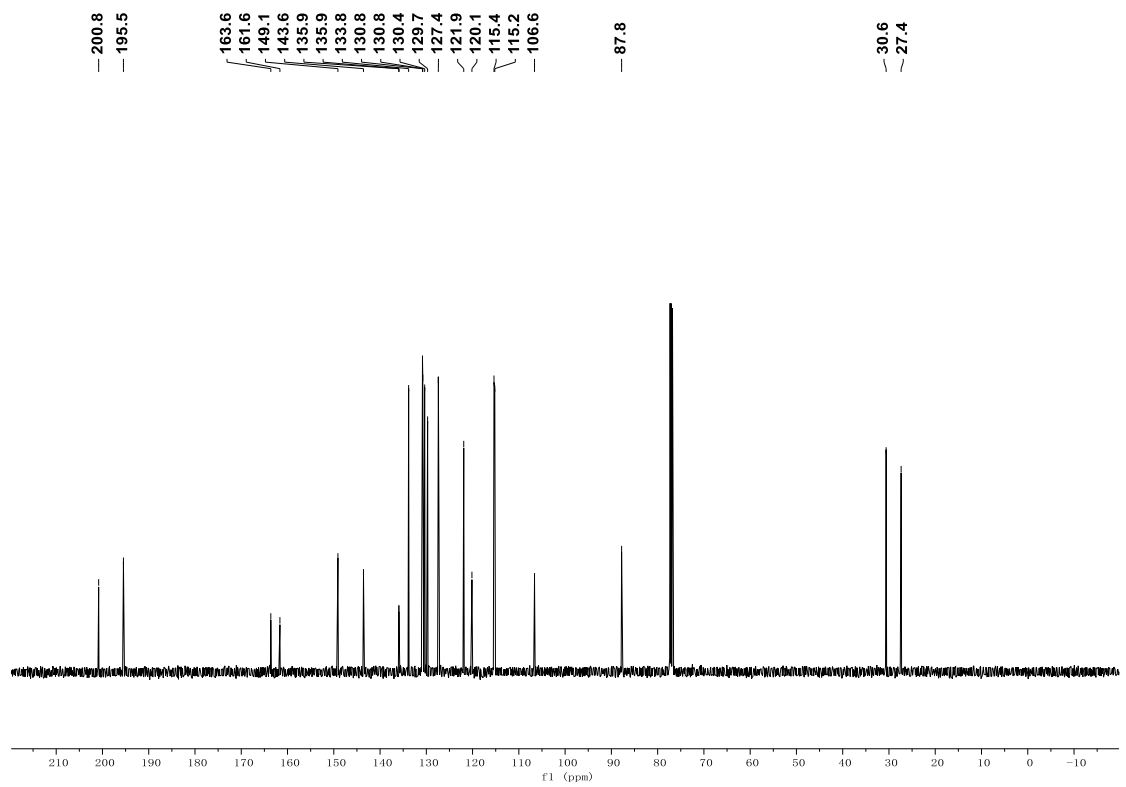

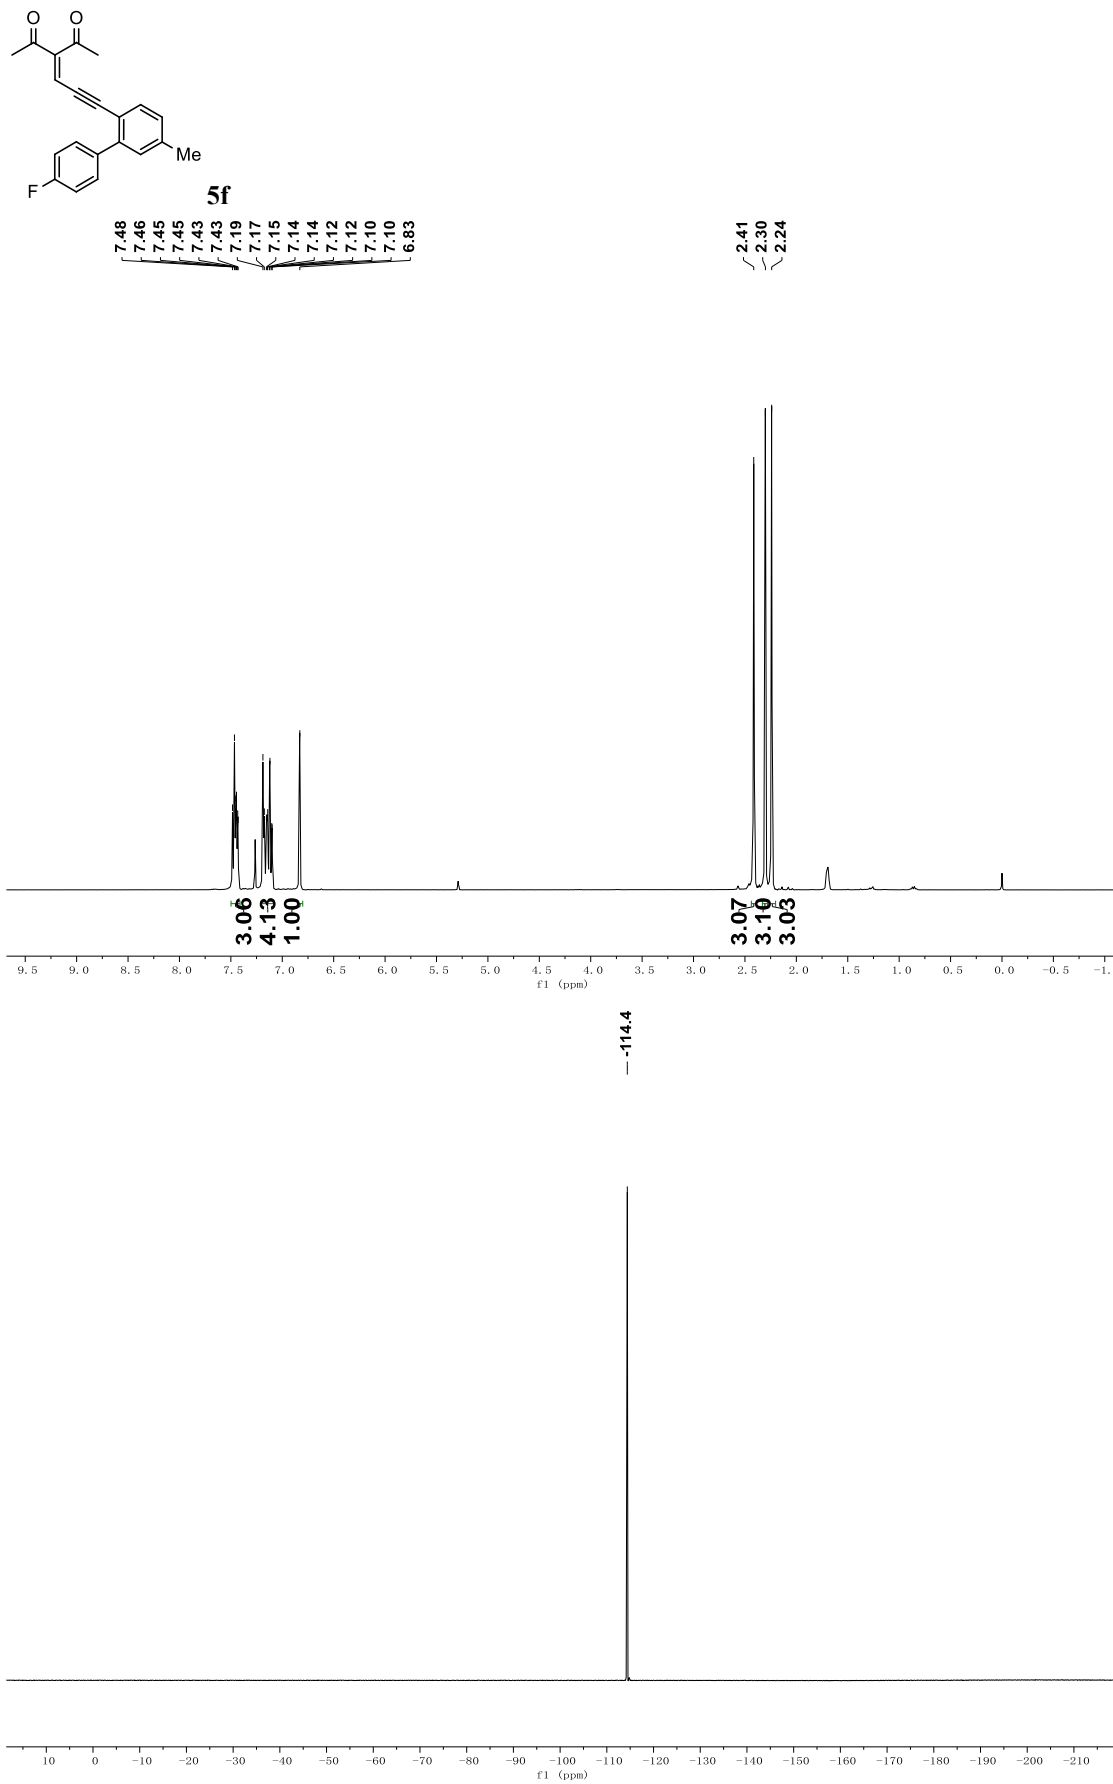

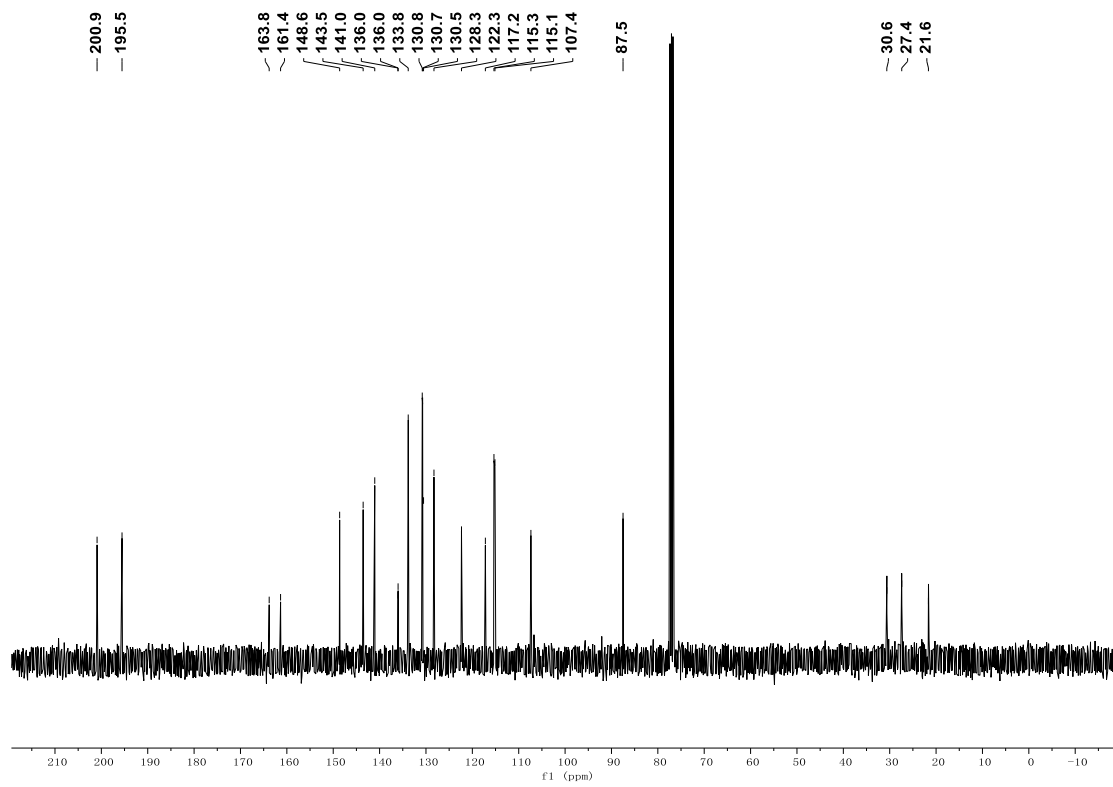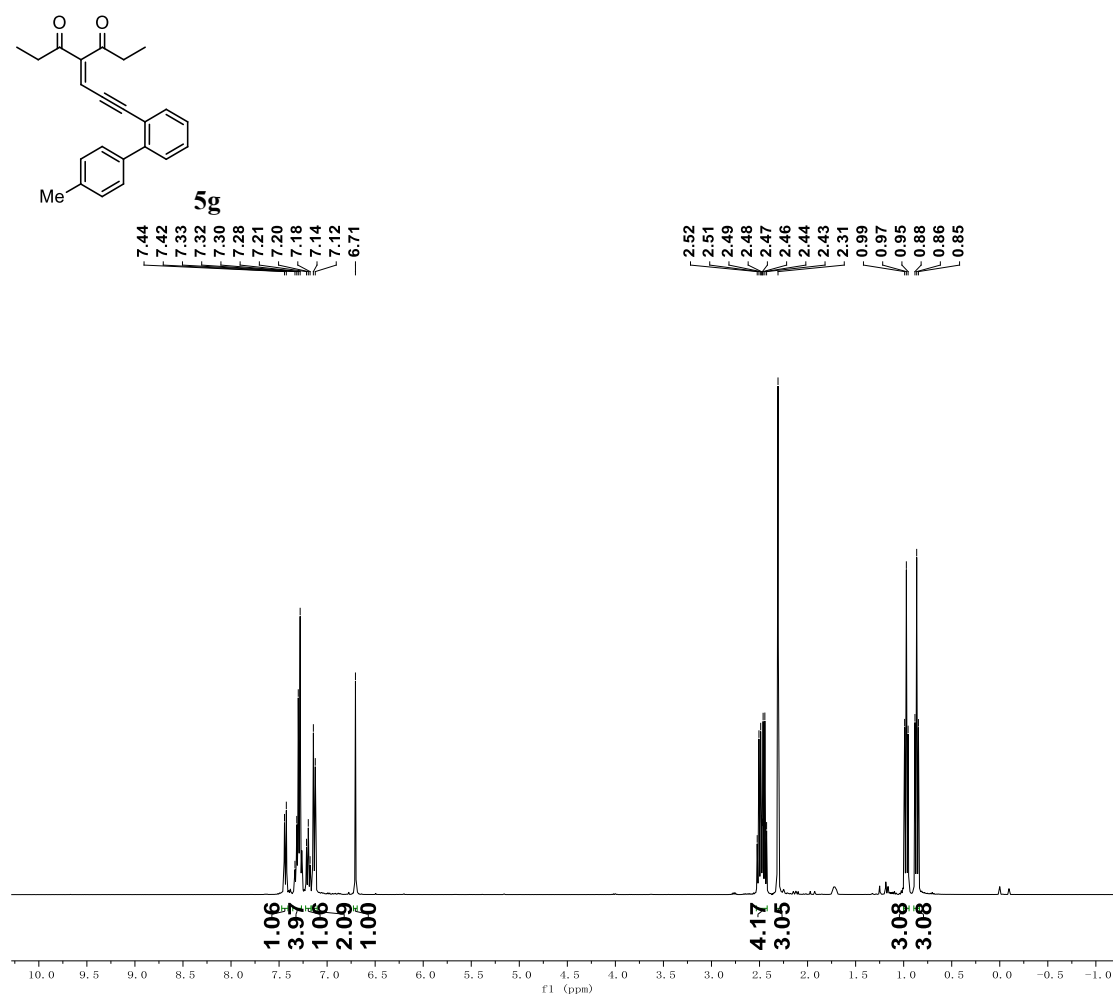

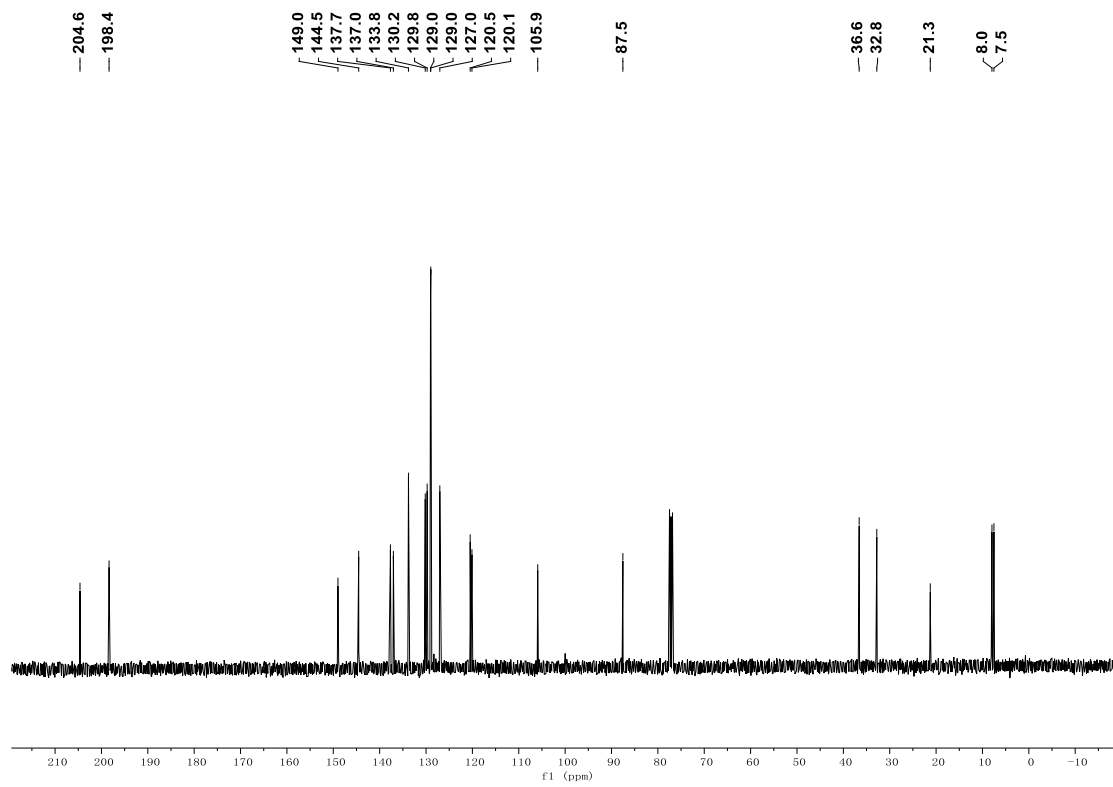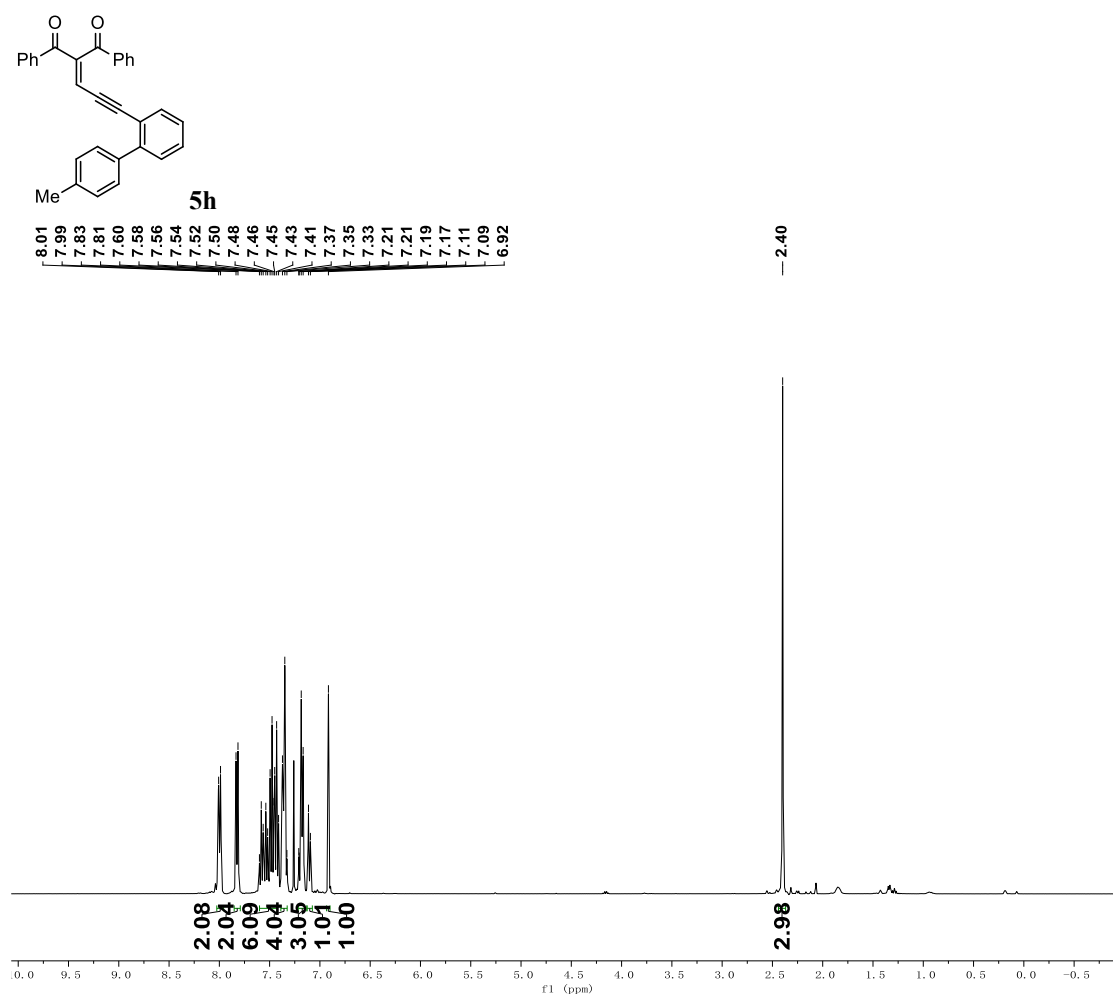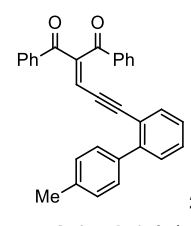

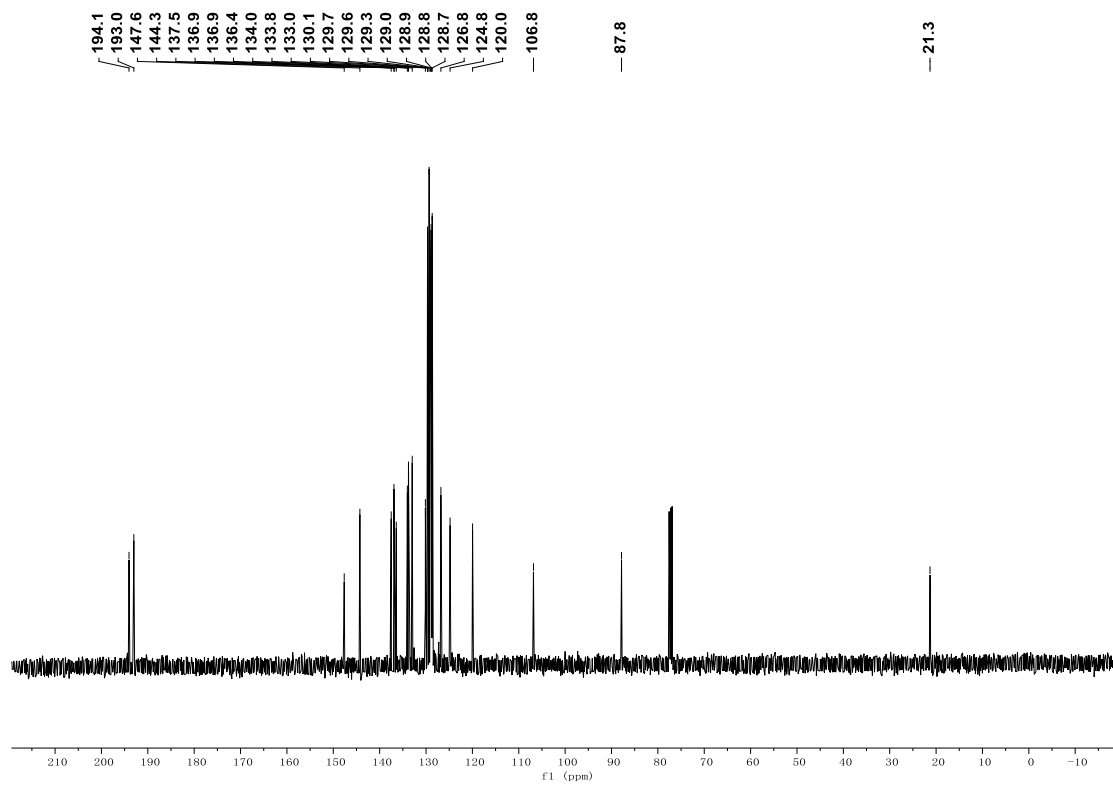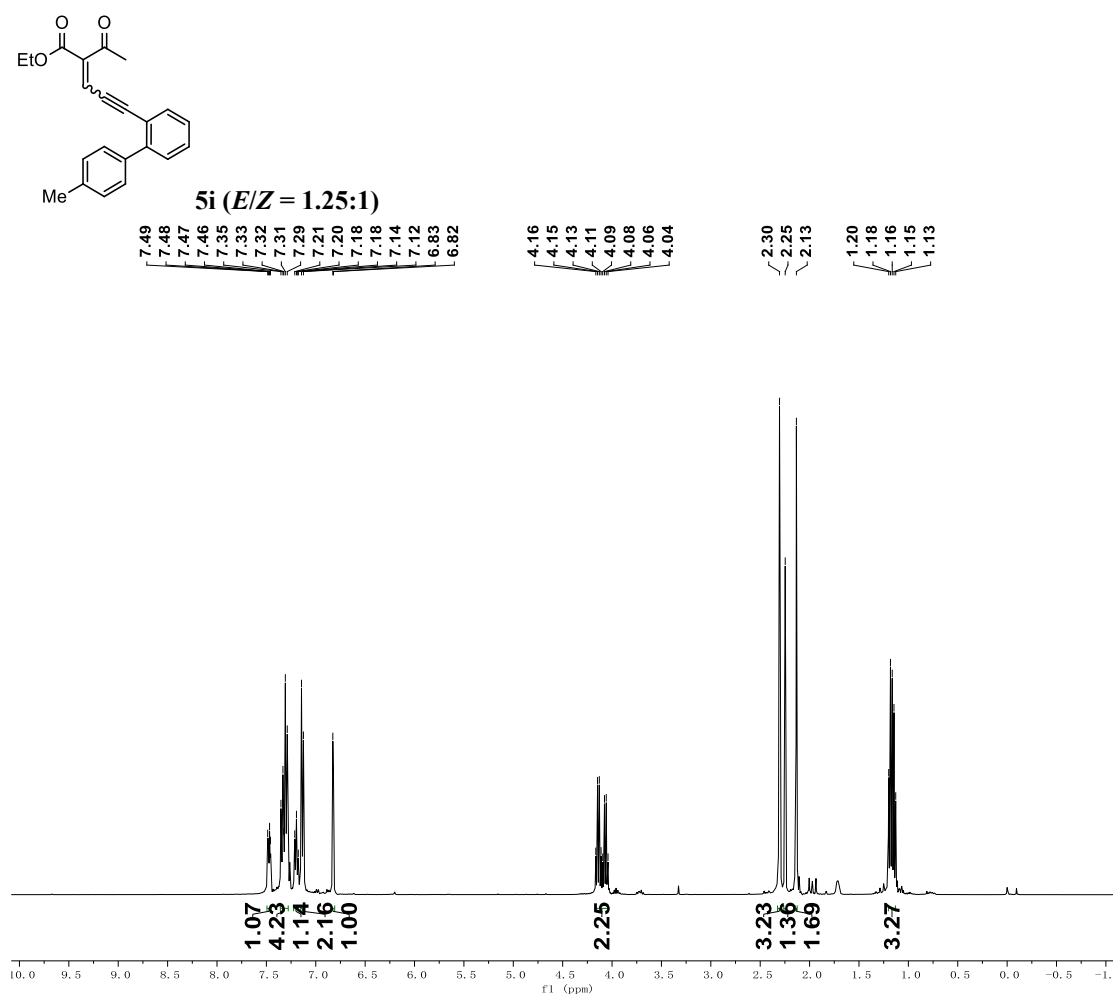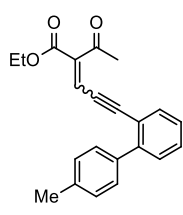

5i (E/Z = 1.25:1)



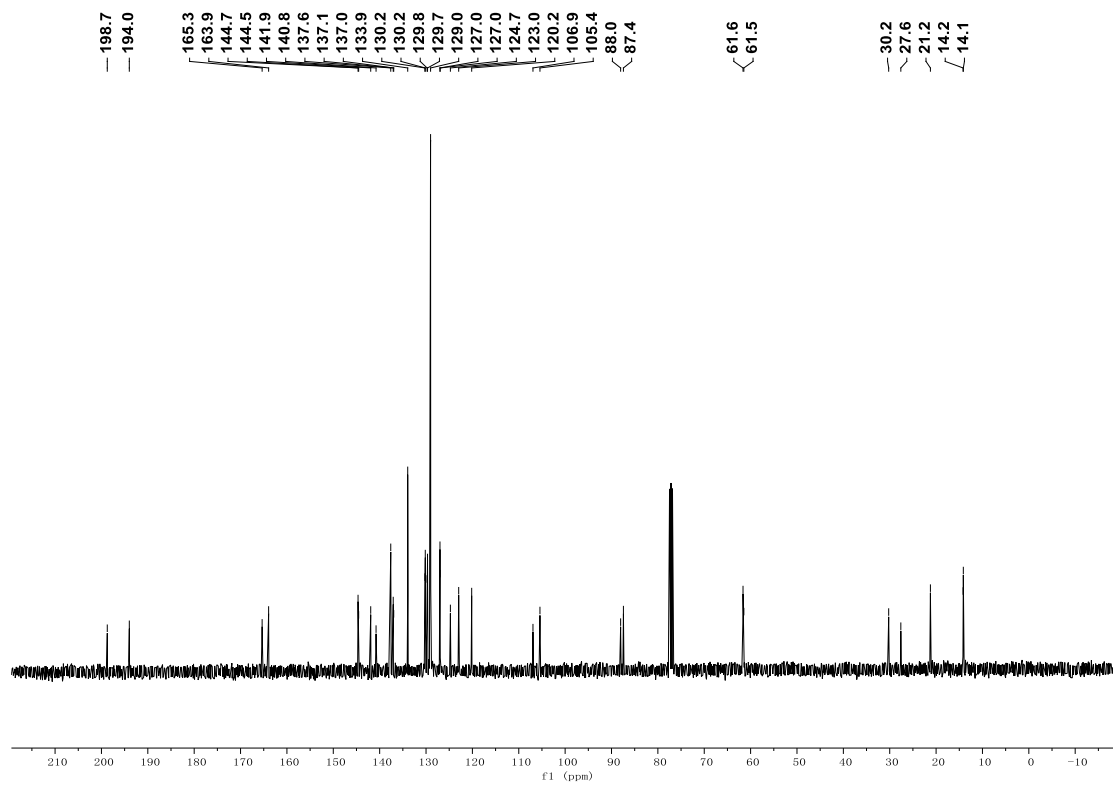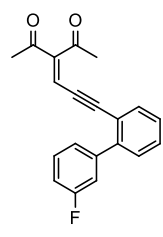

5j

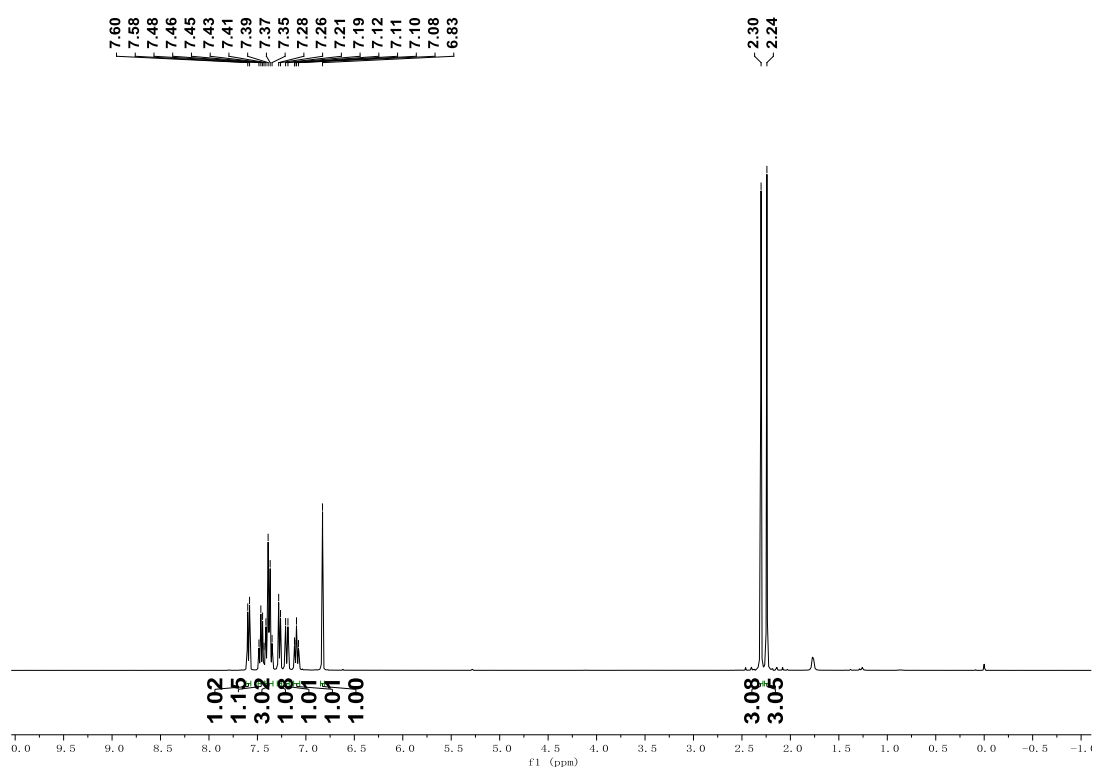

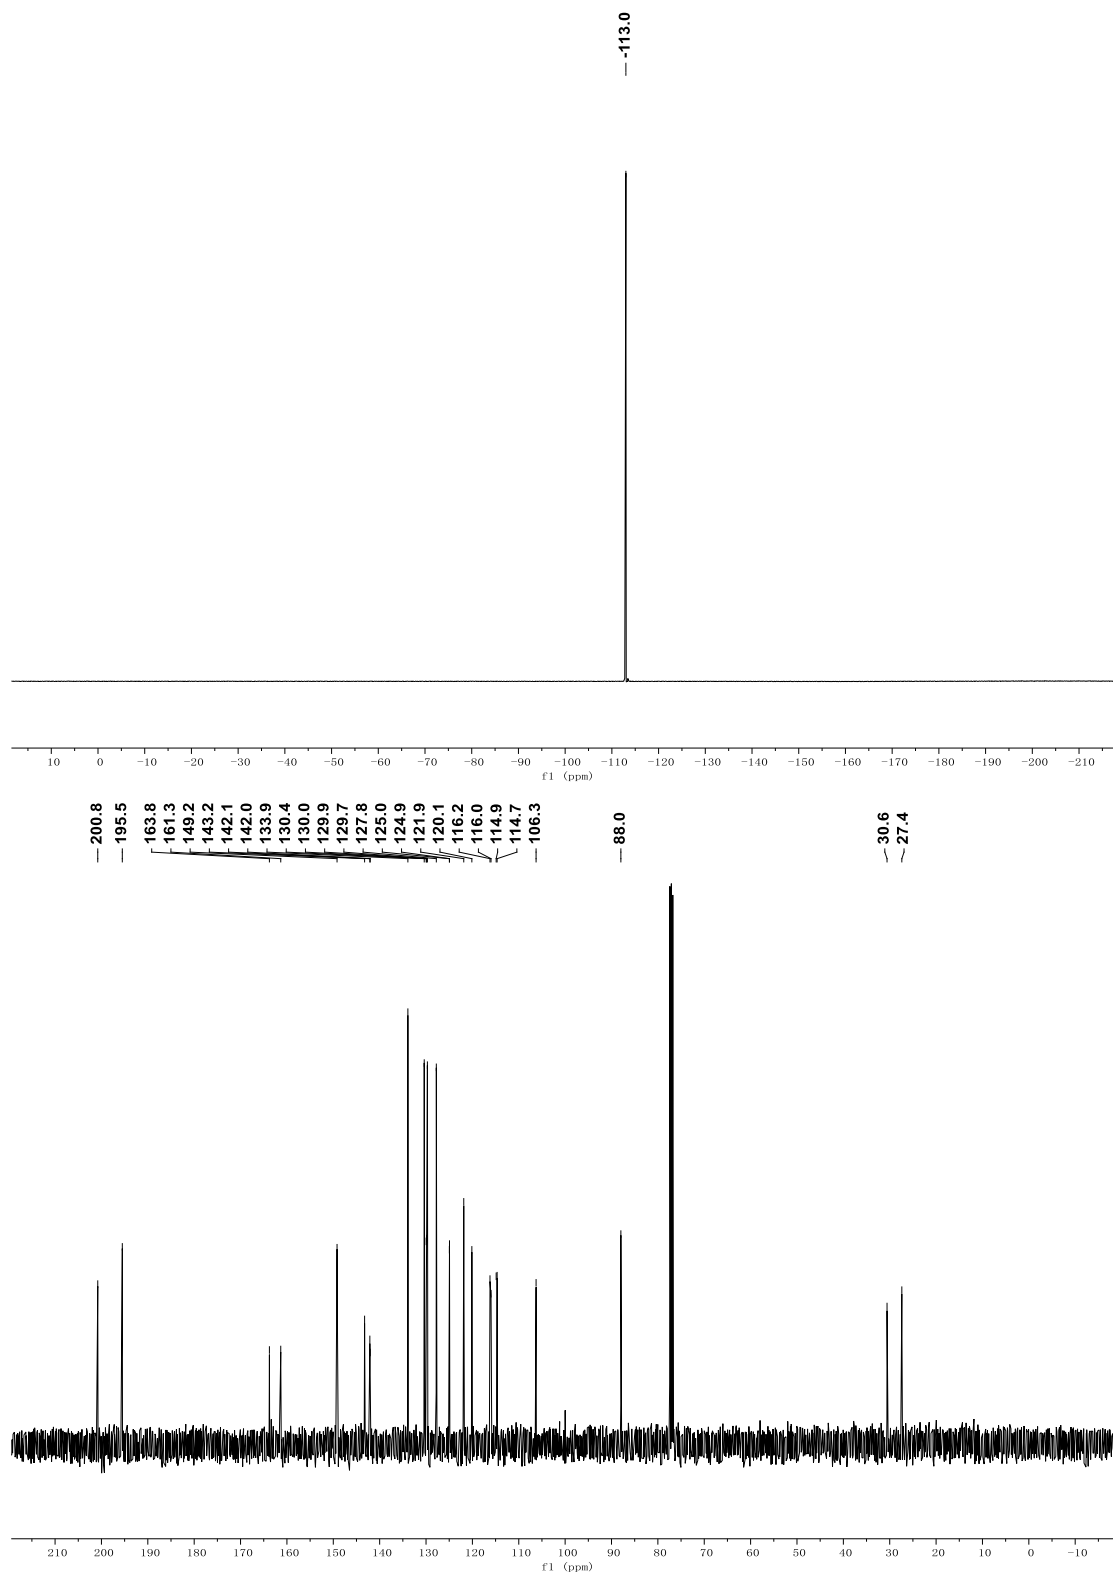

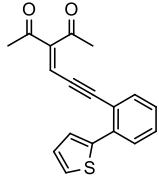

**5k**

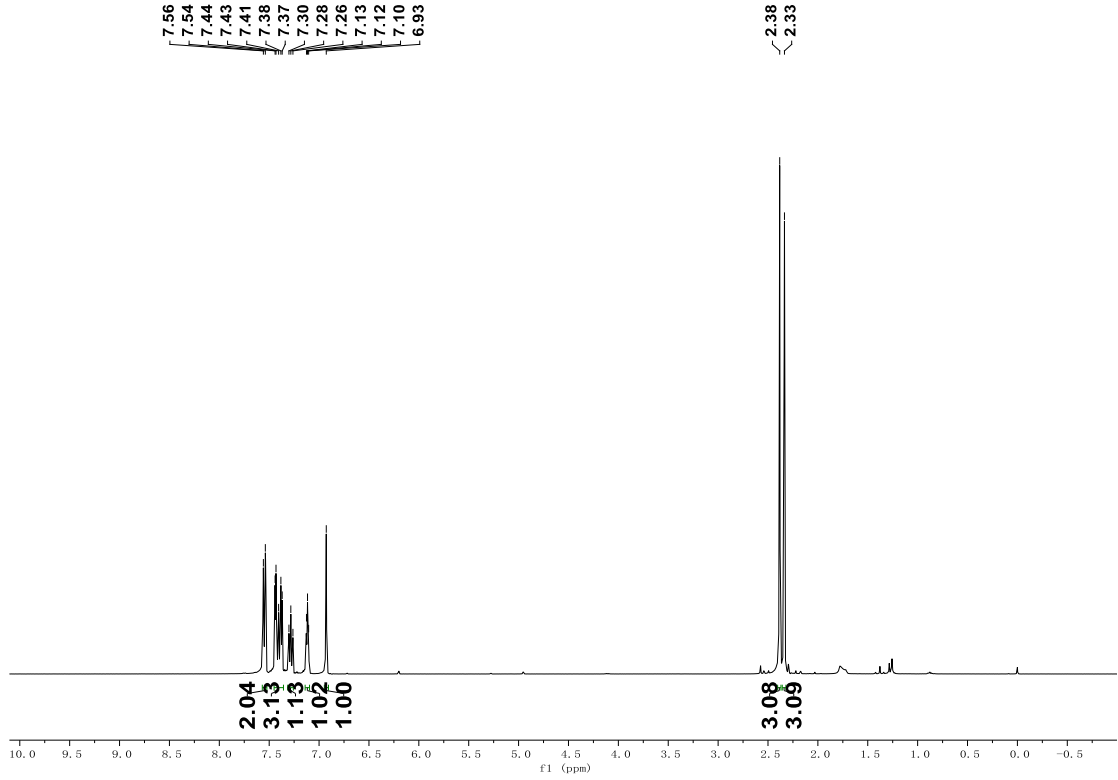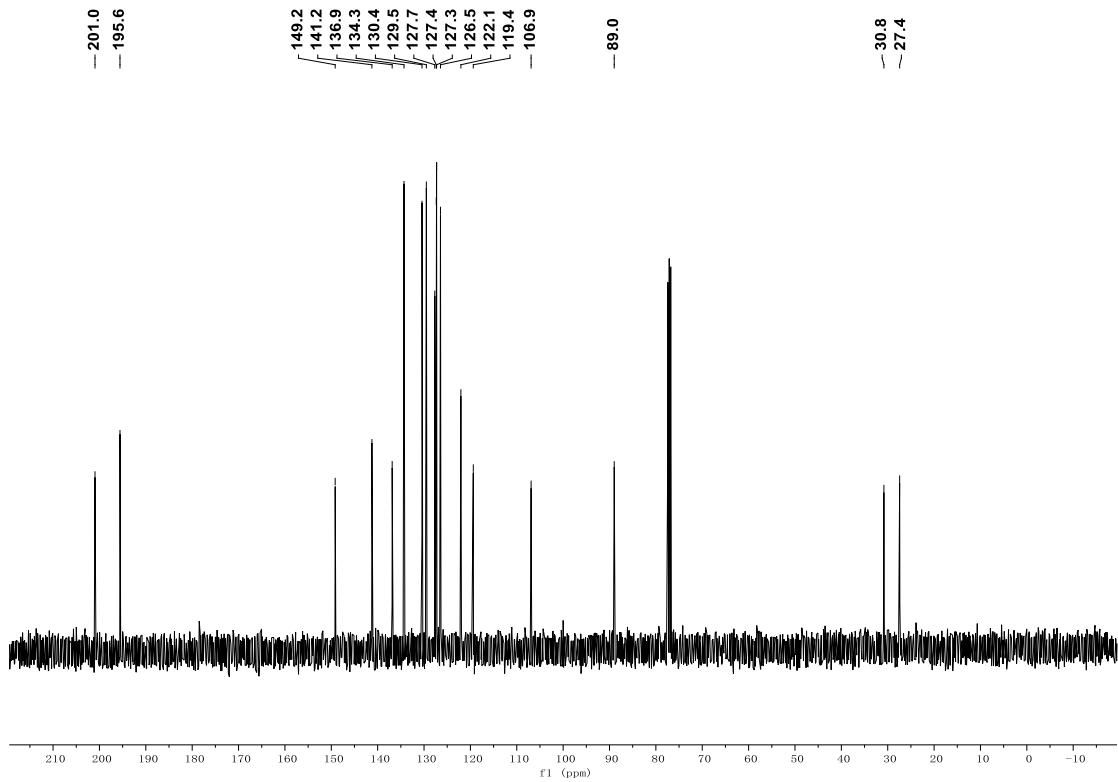

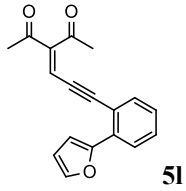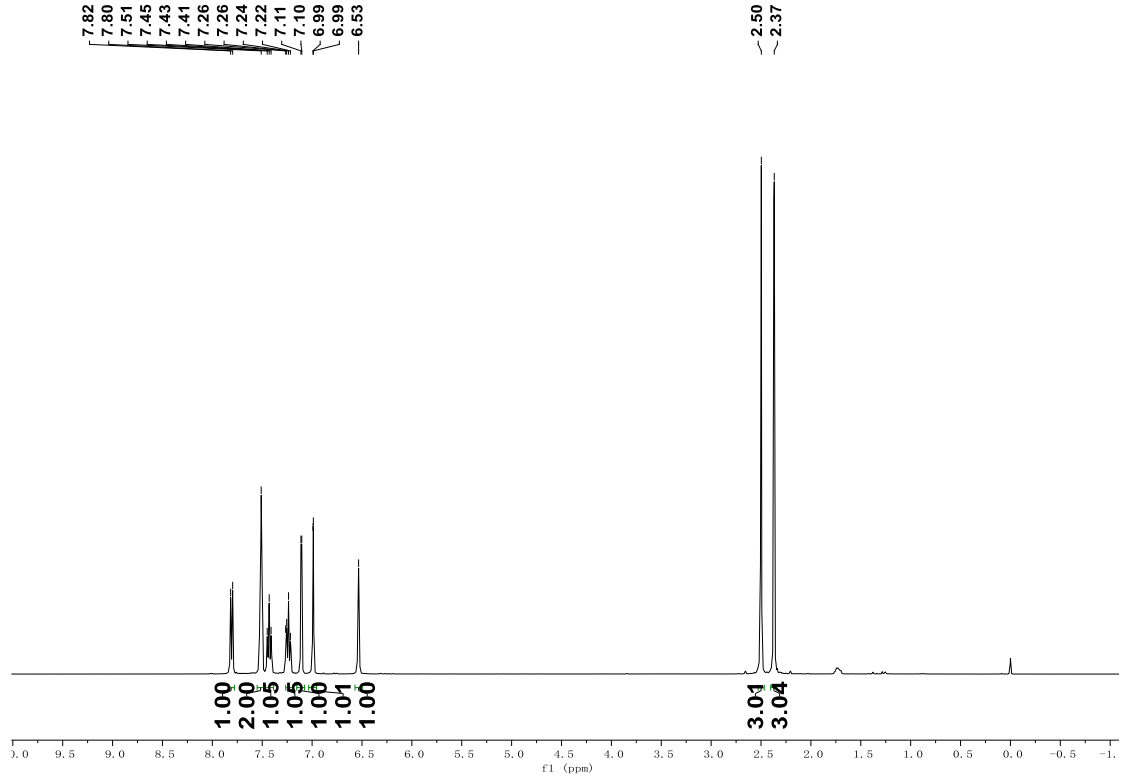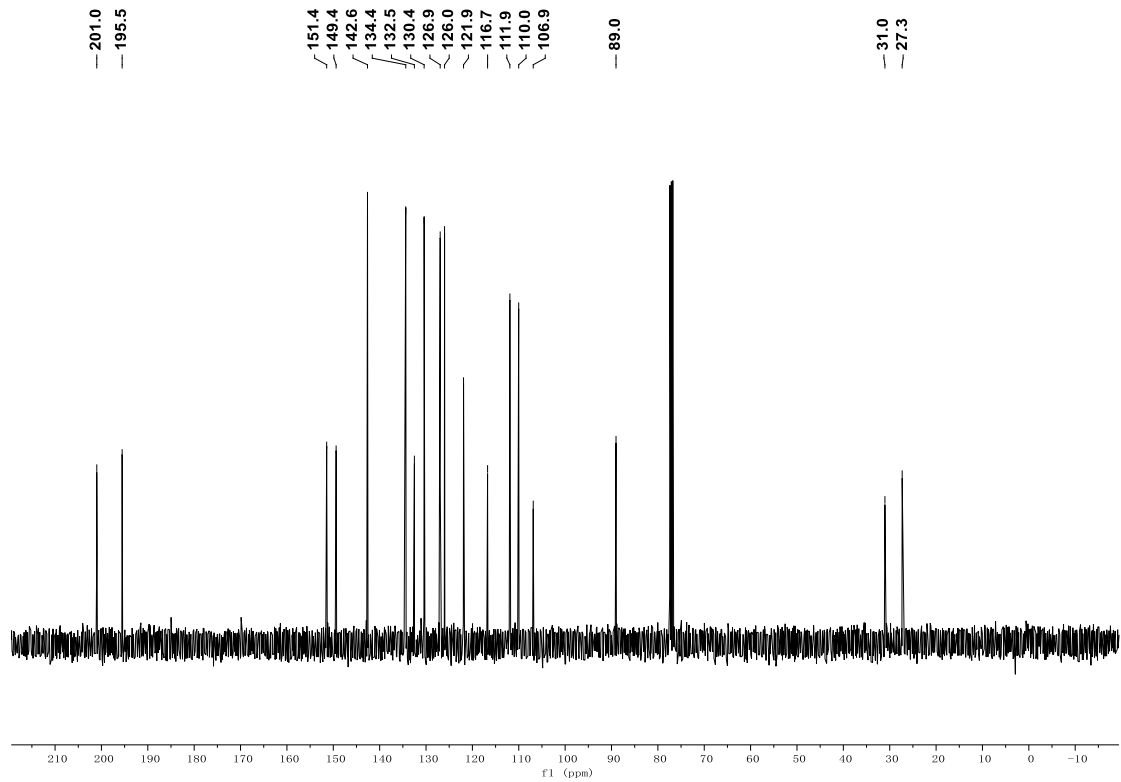

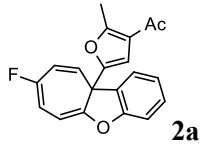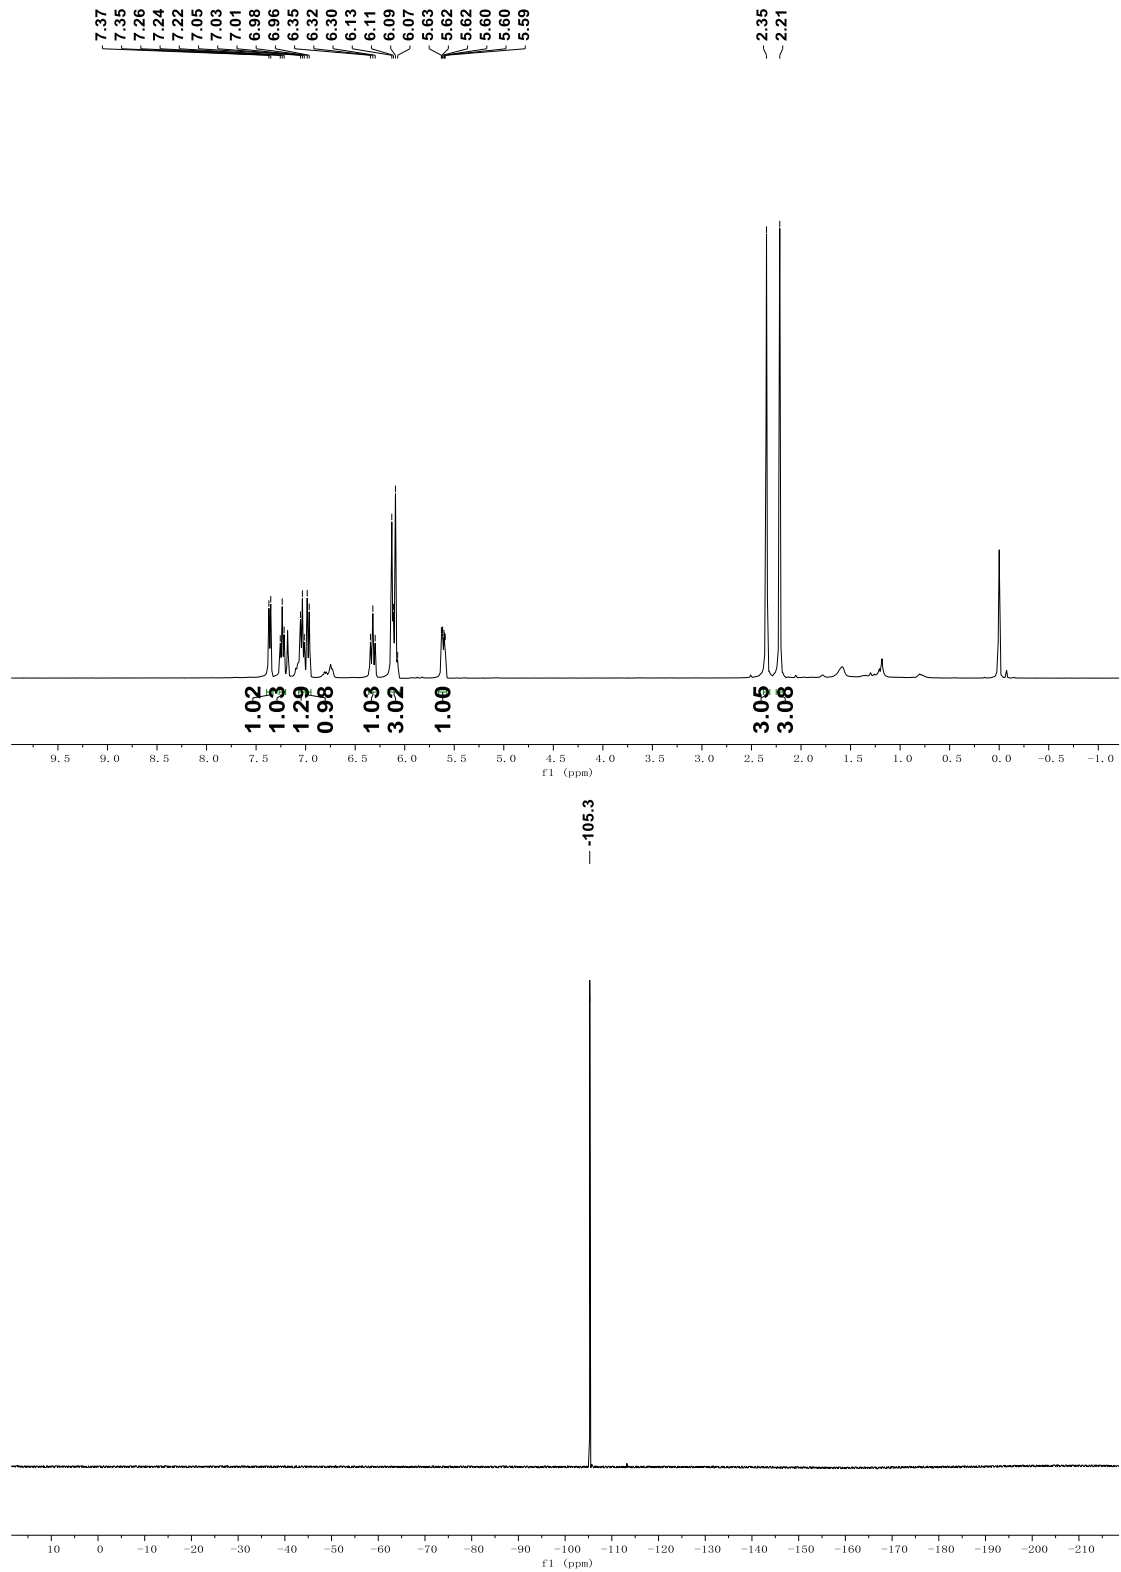

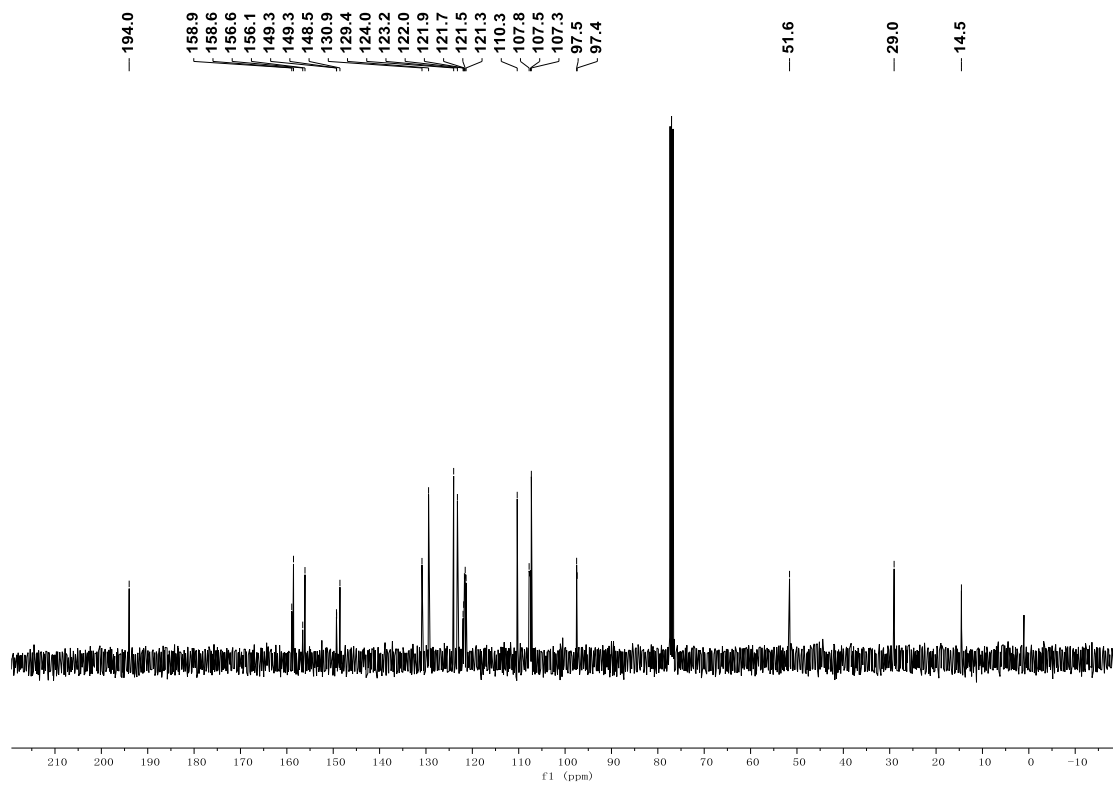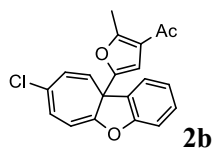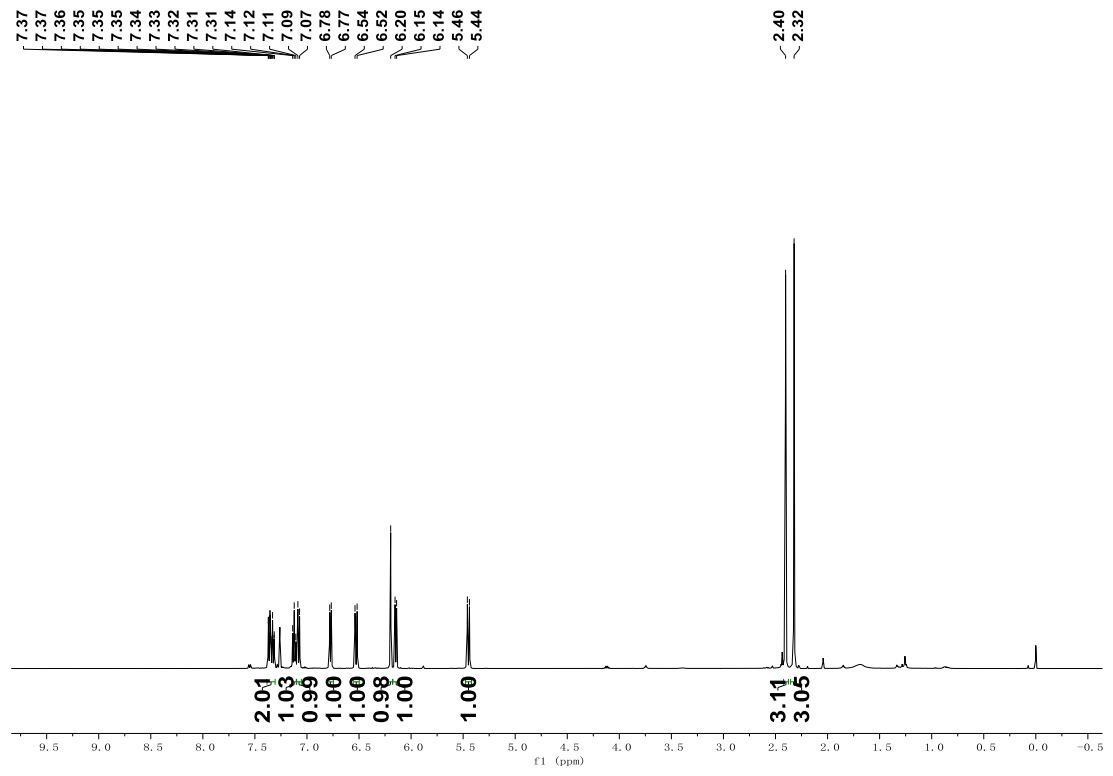

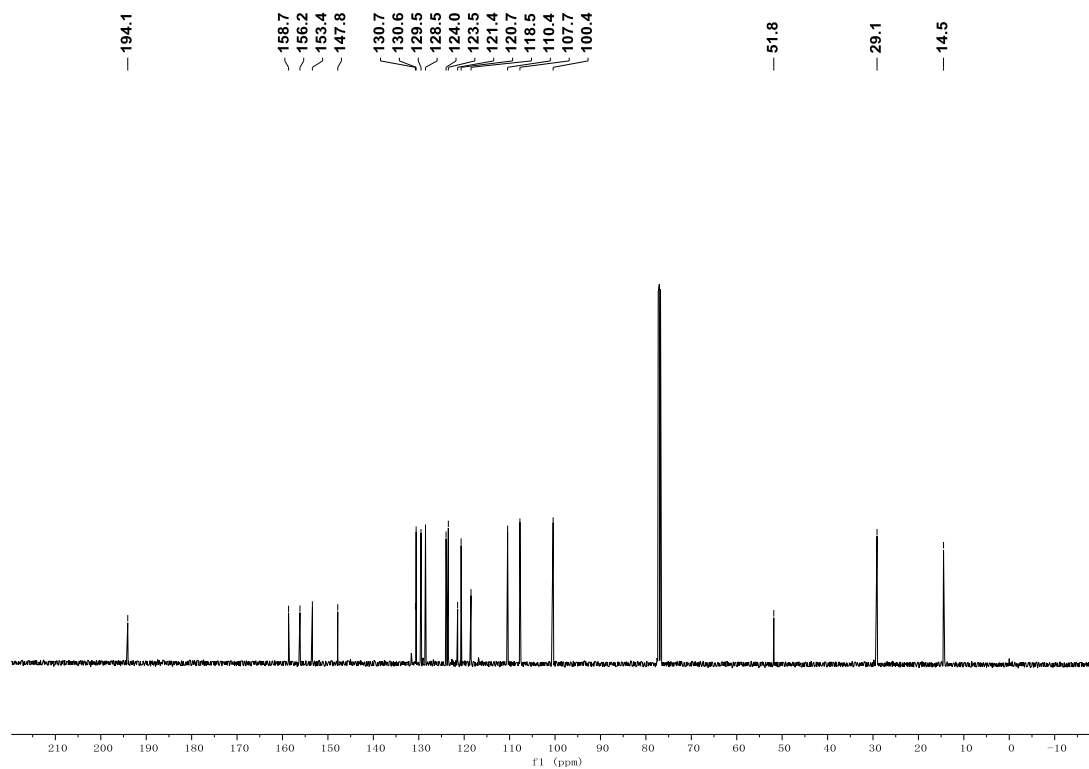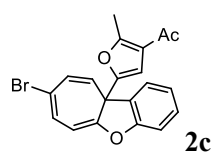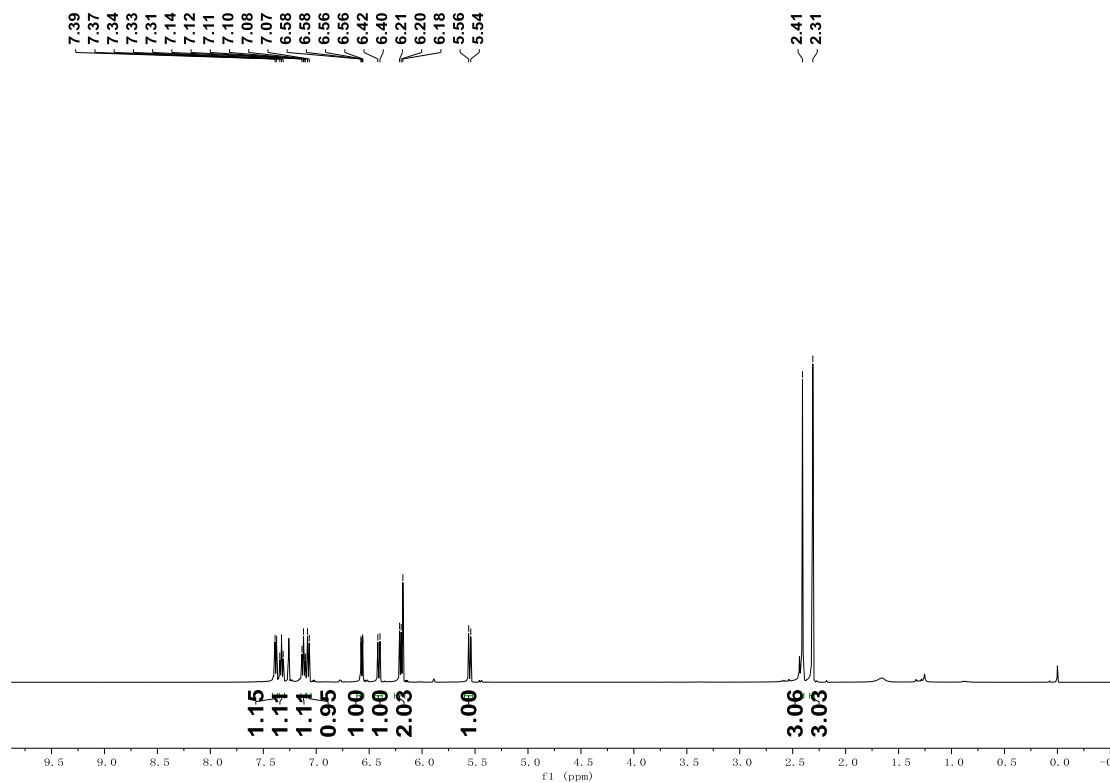

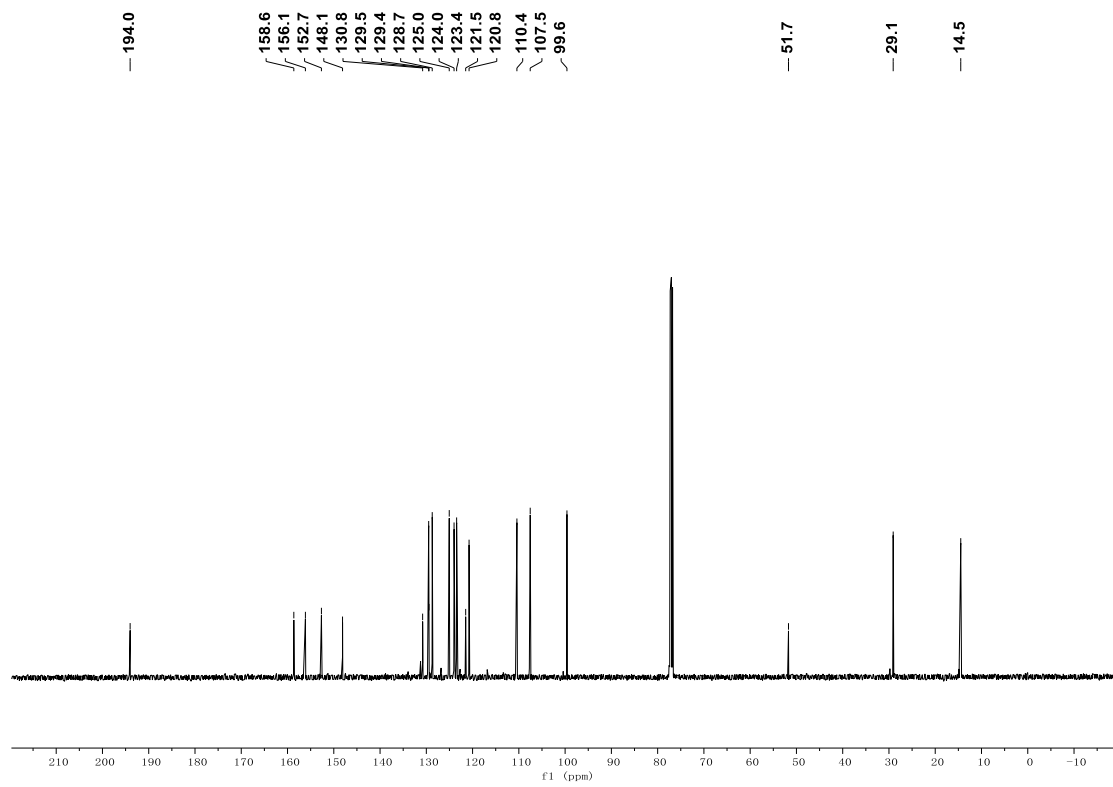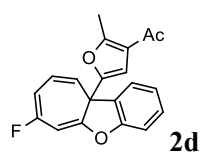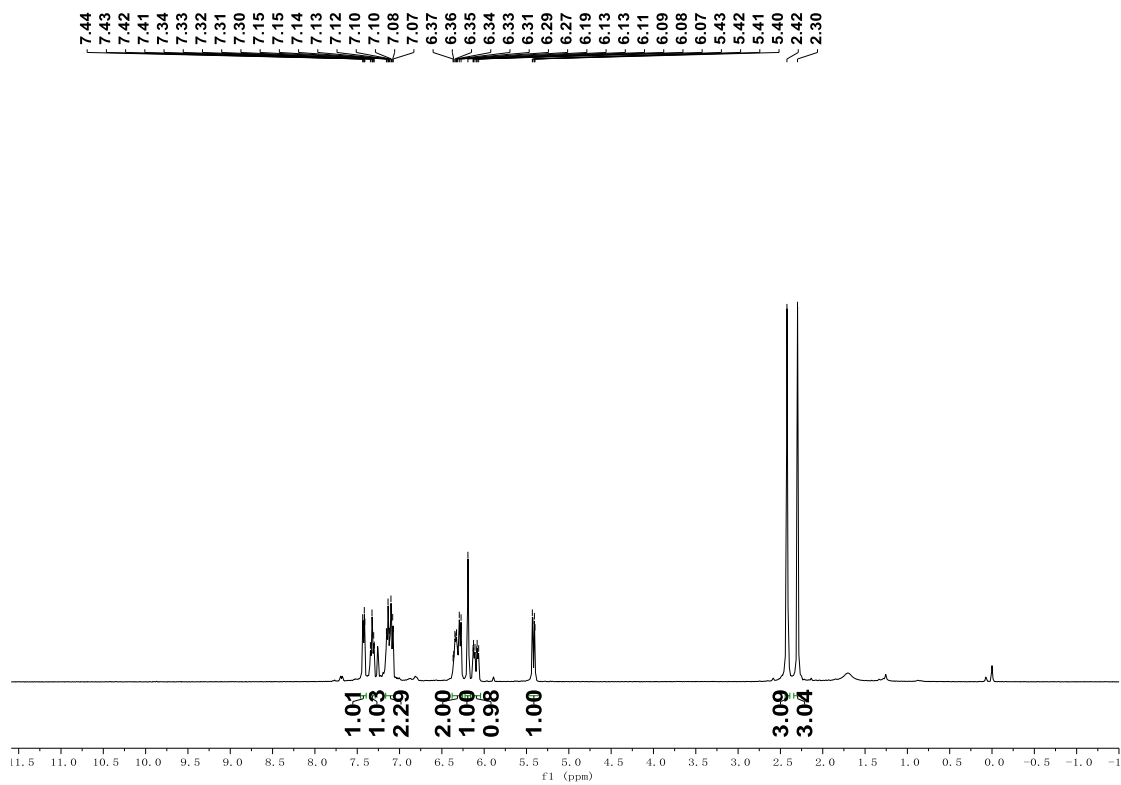



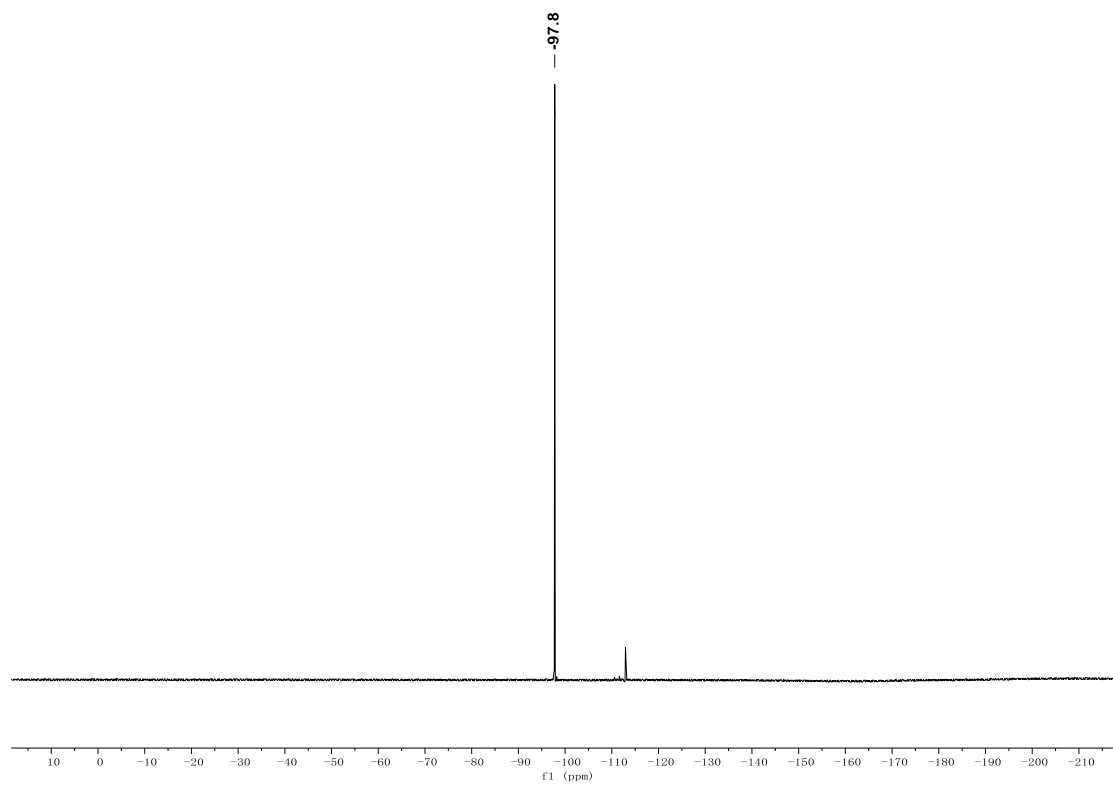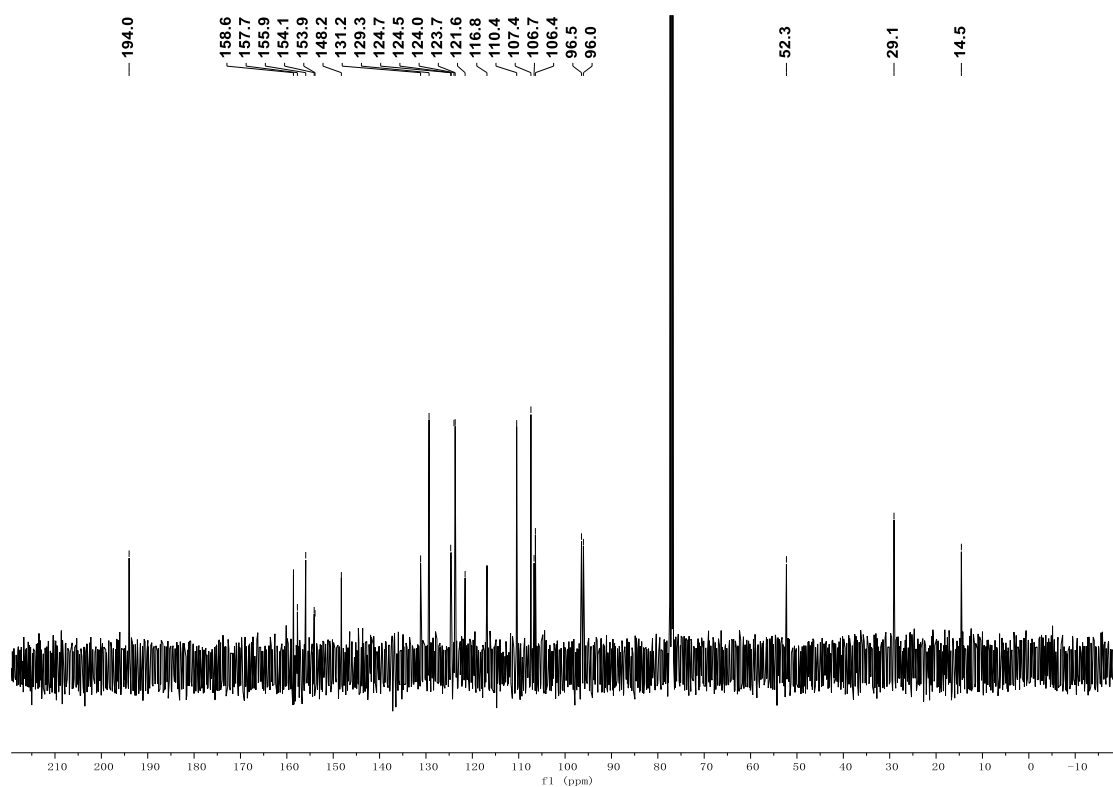

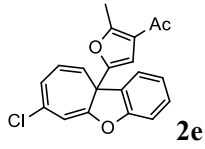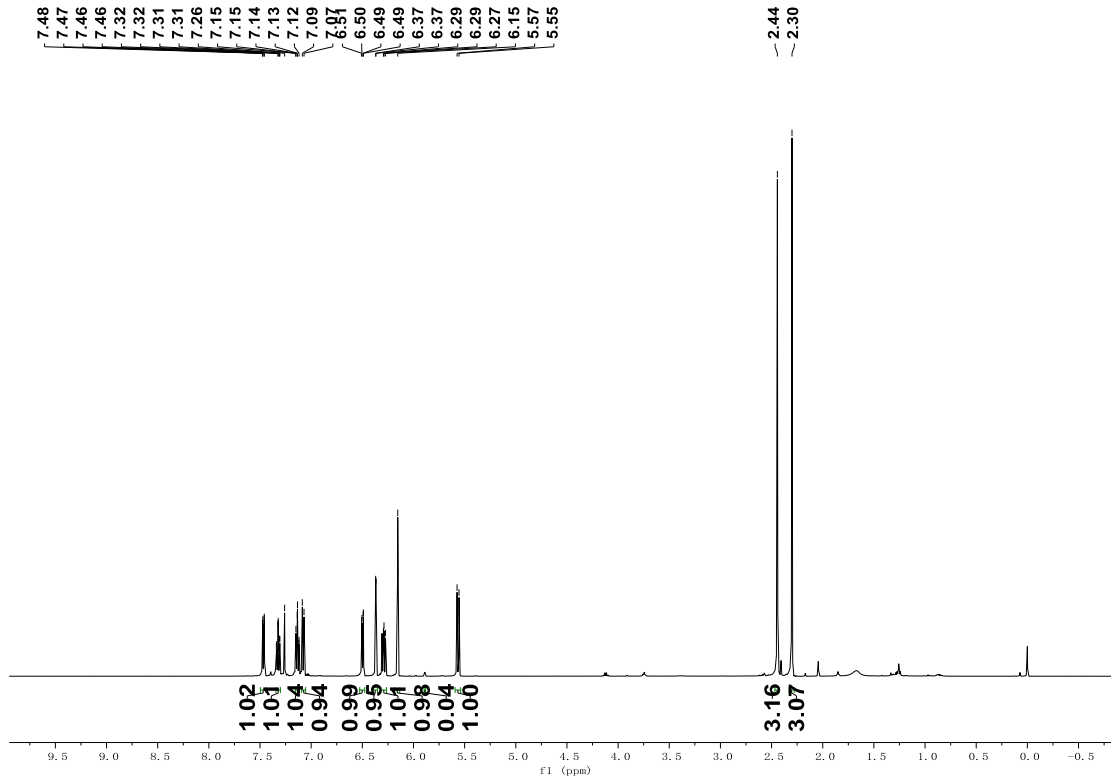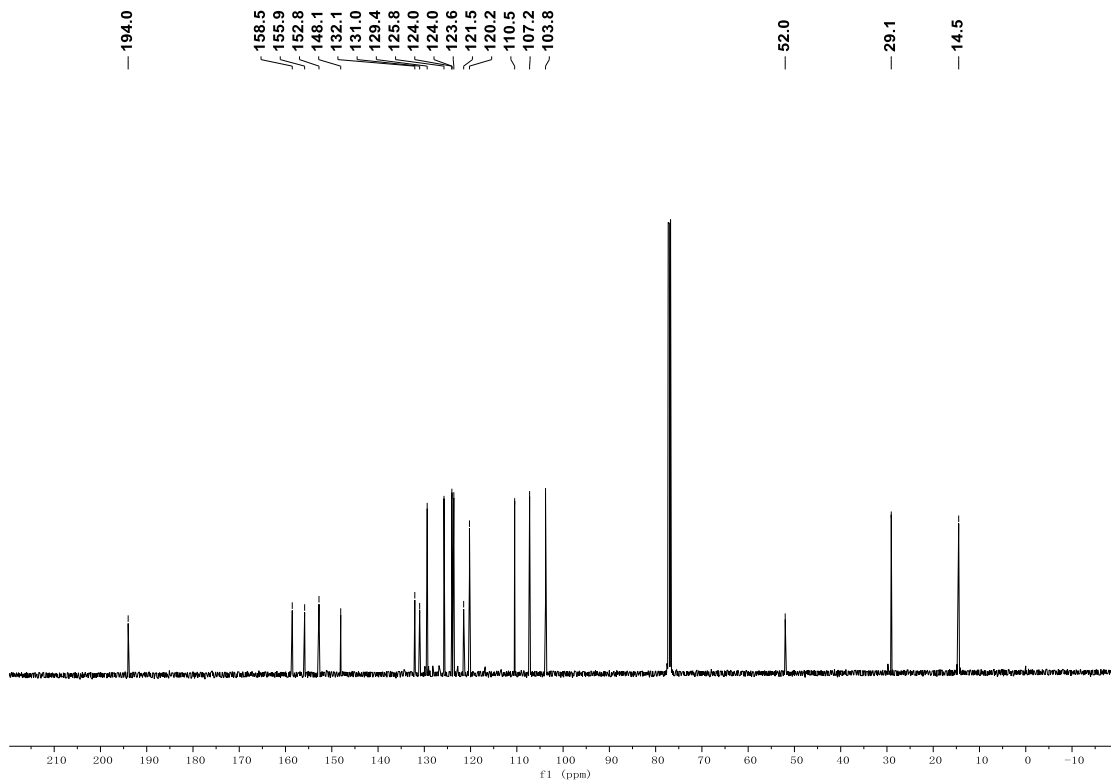

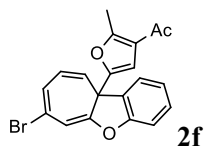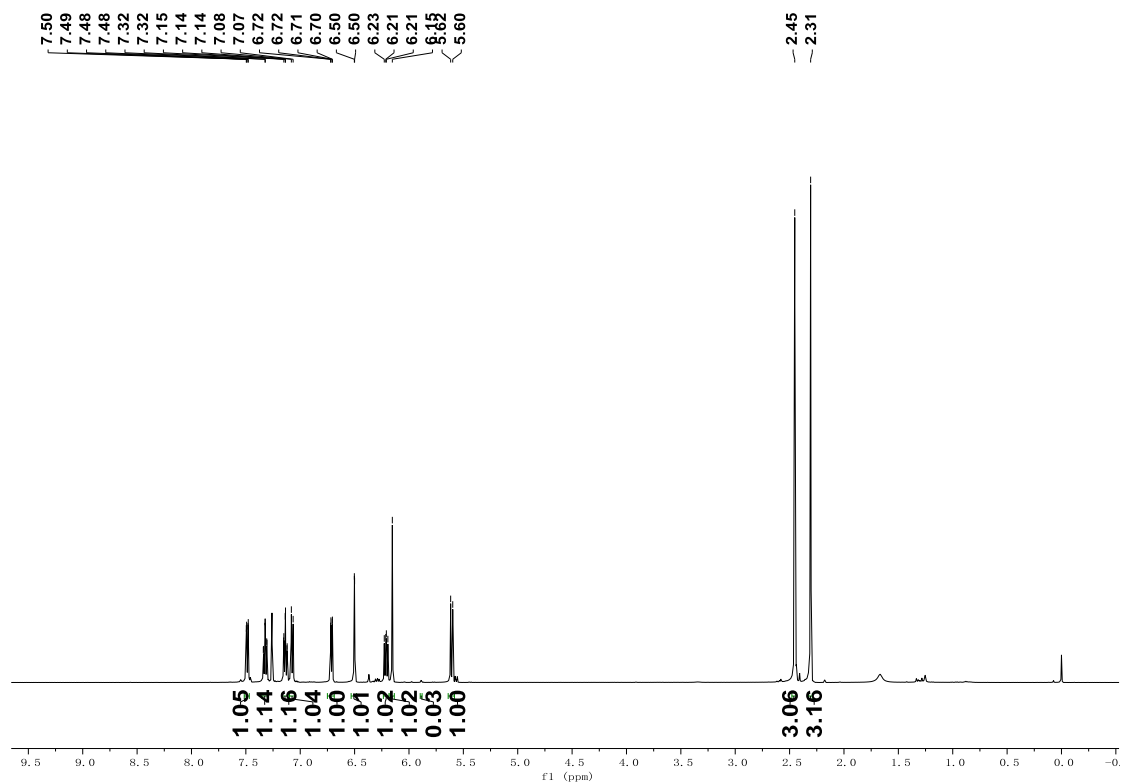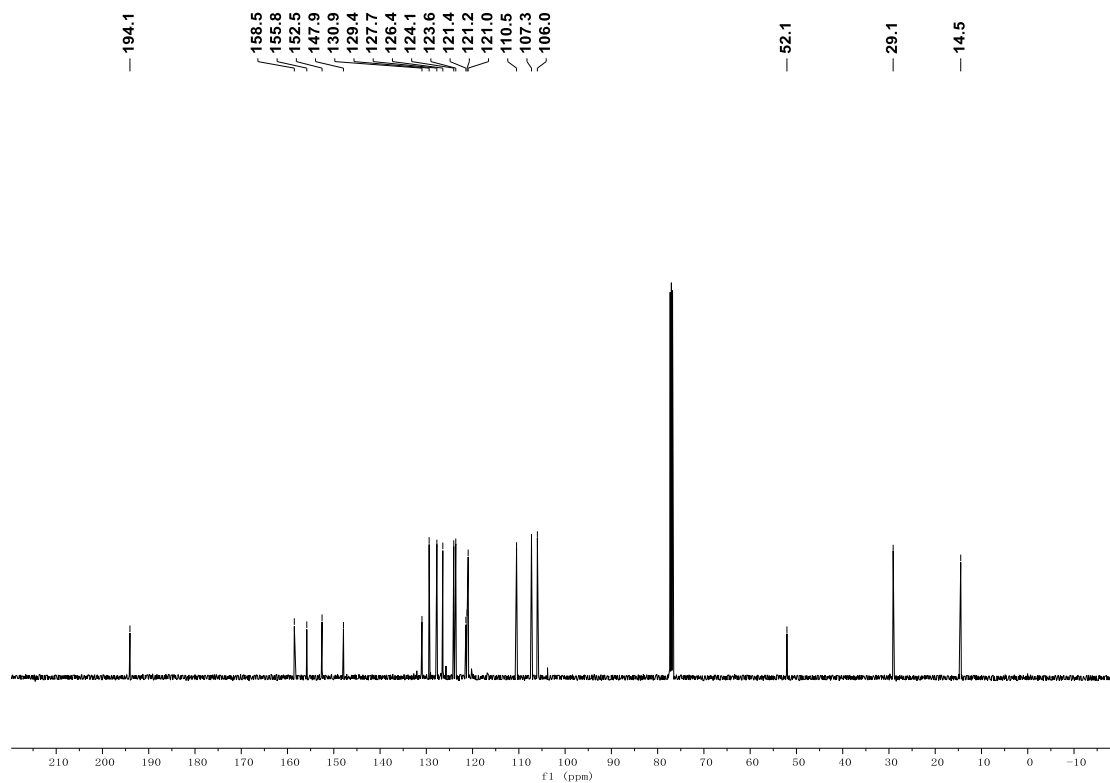

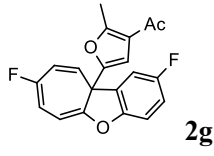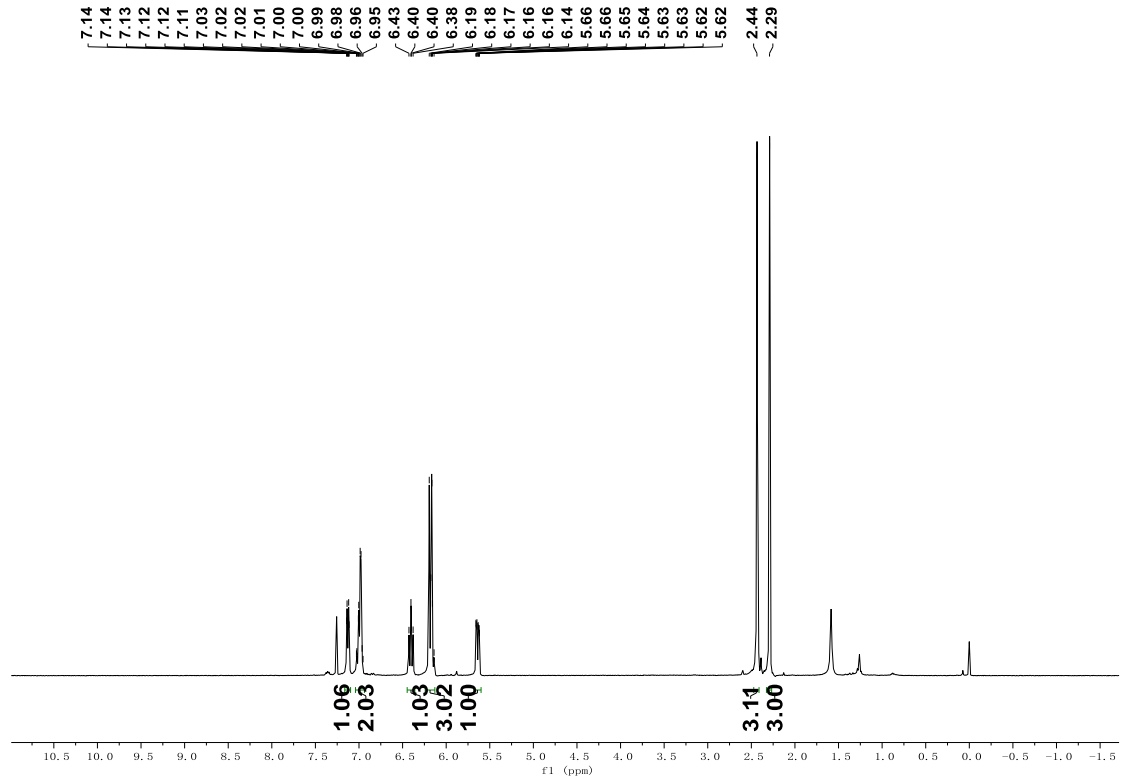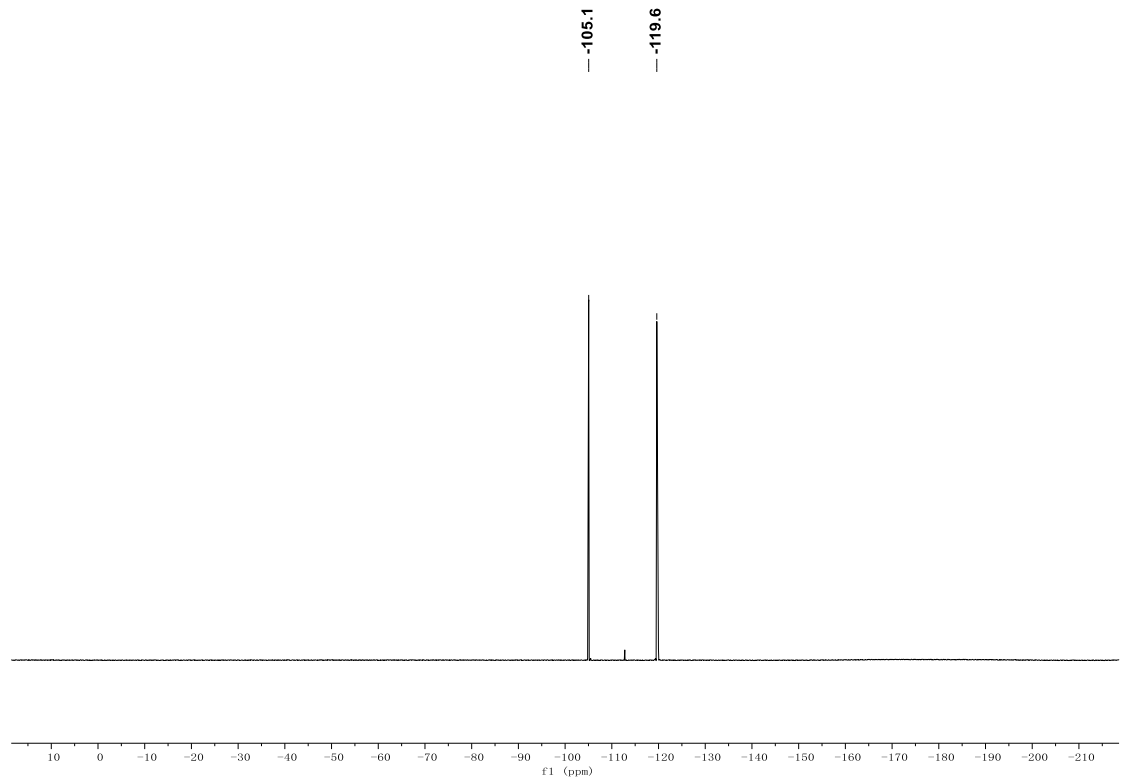

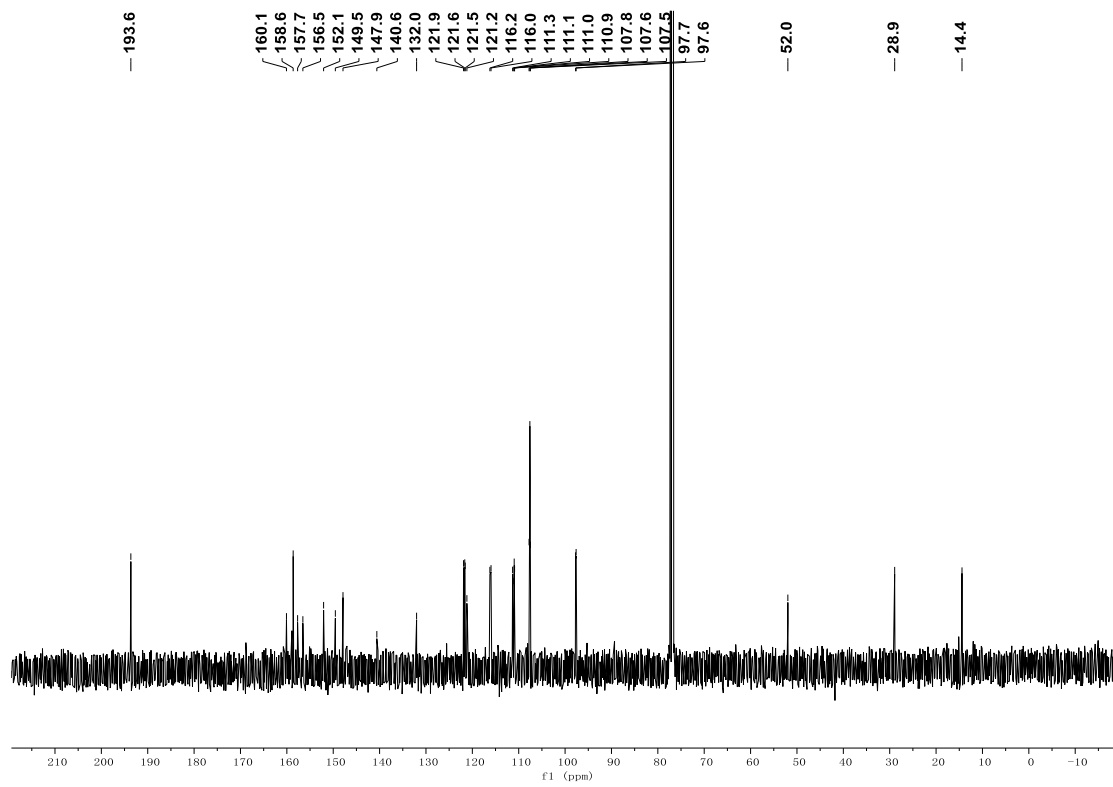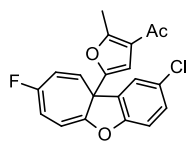

**2h**

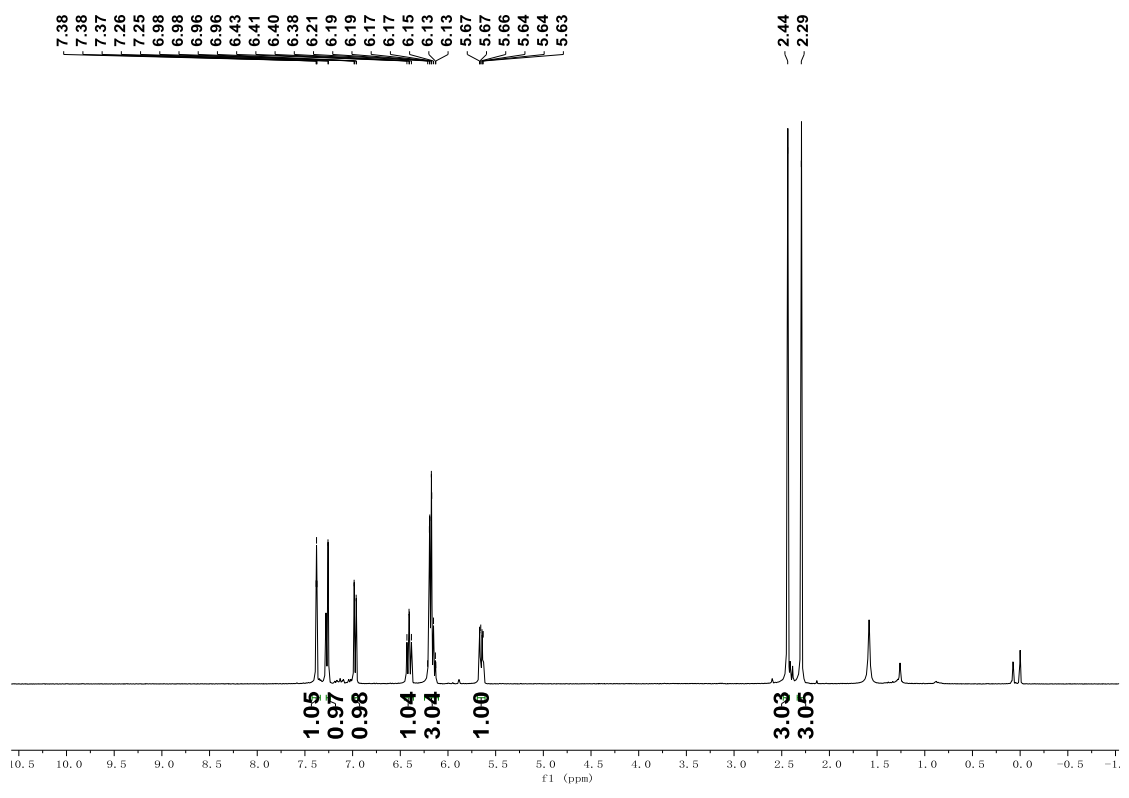

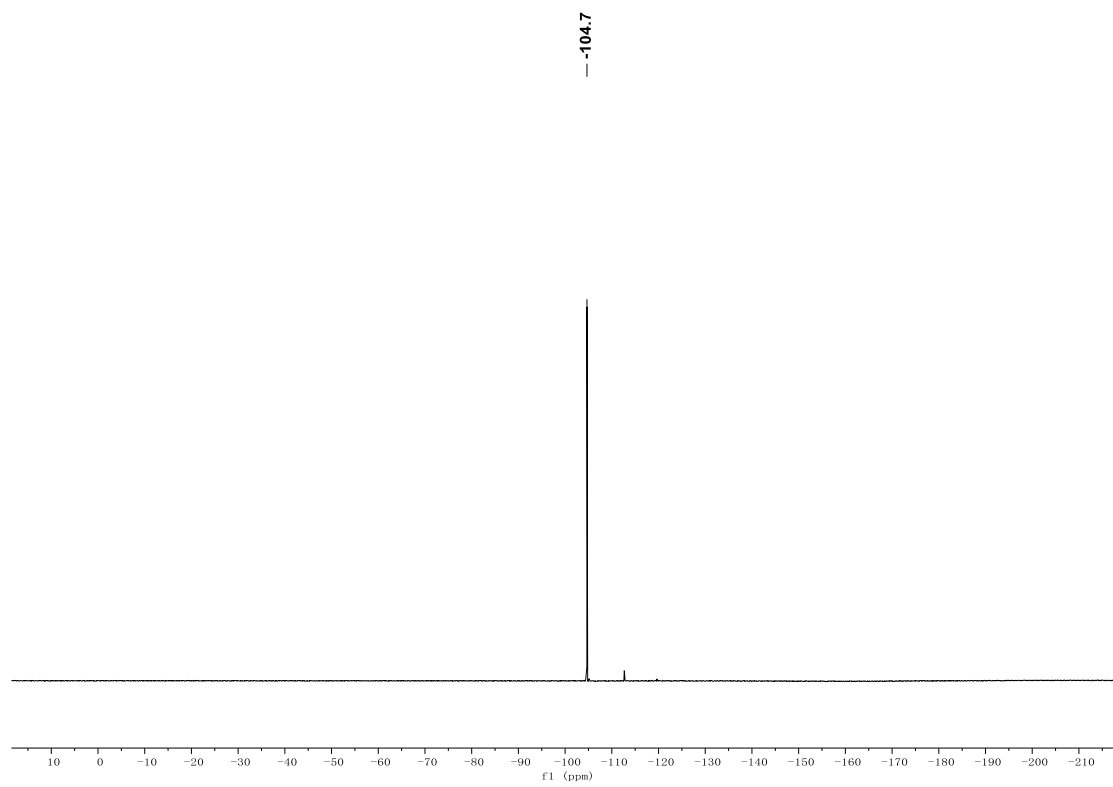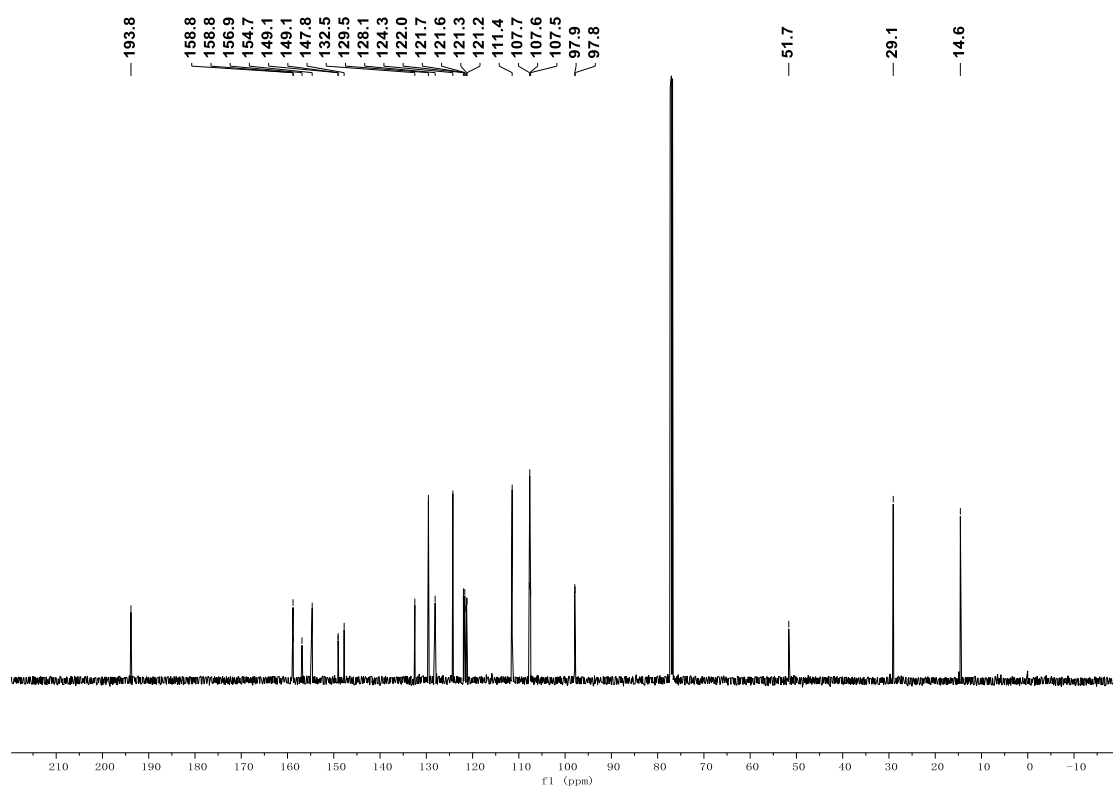

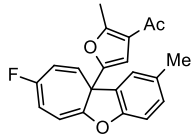

**2i**

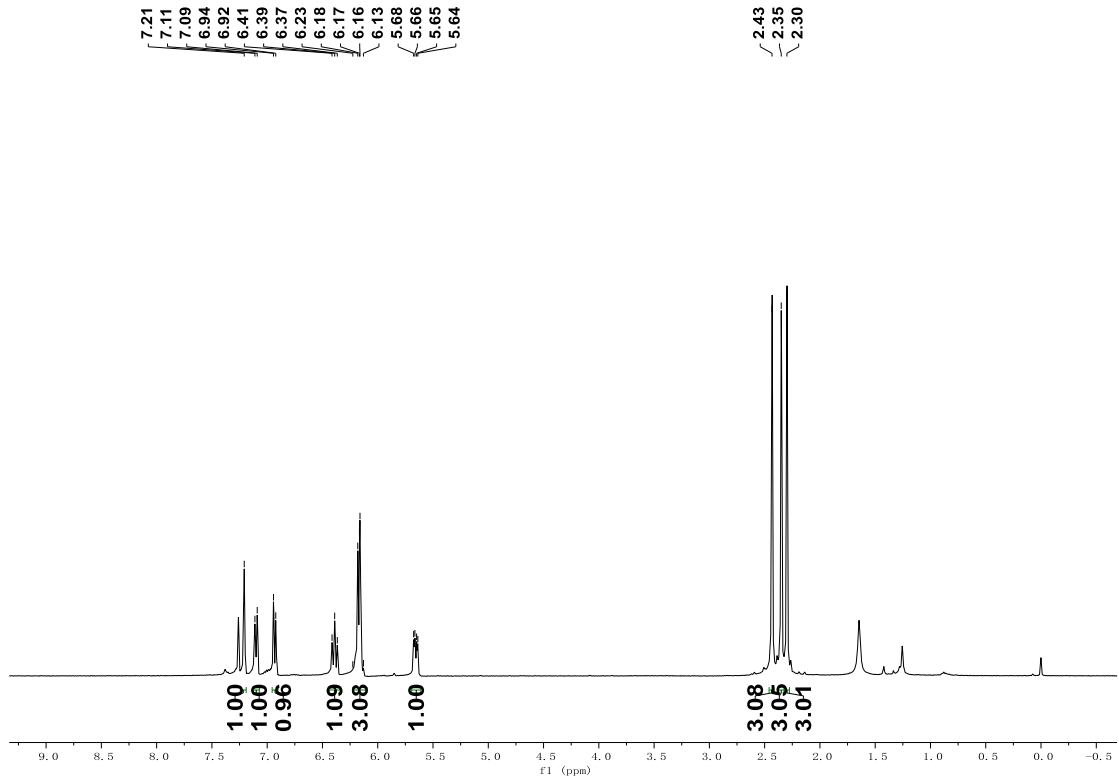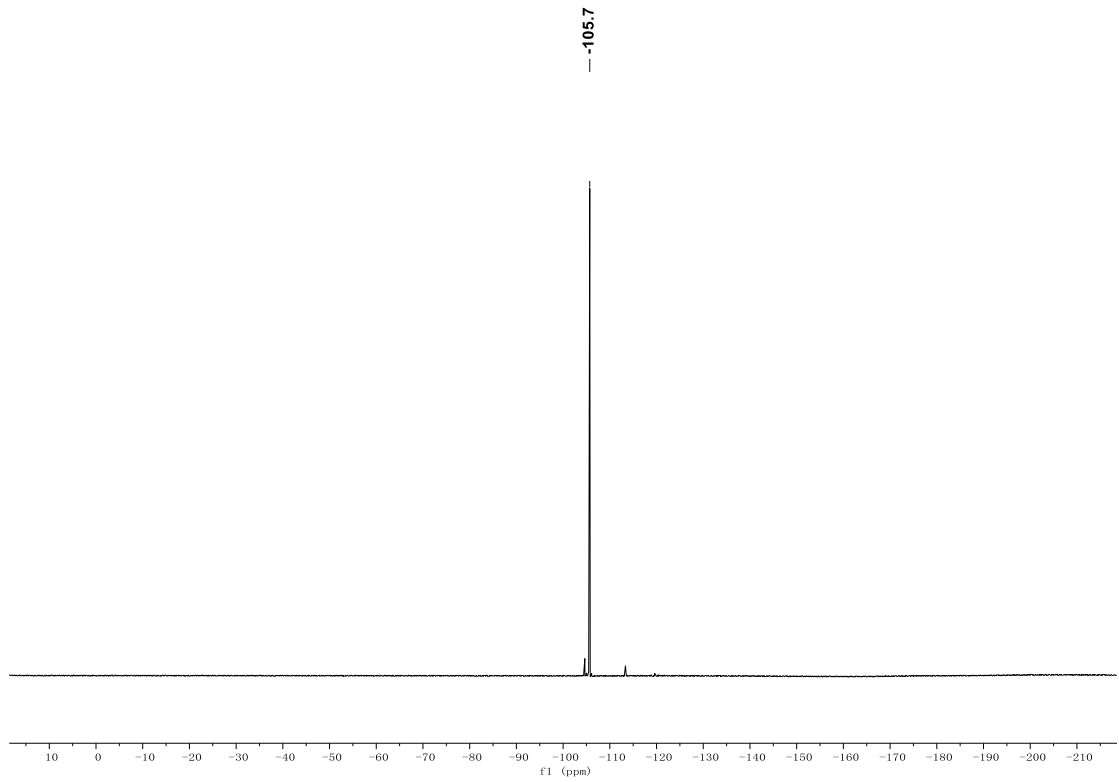

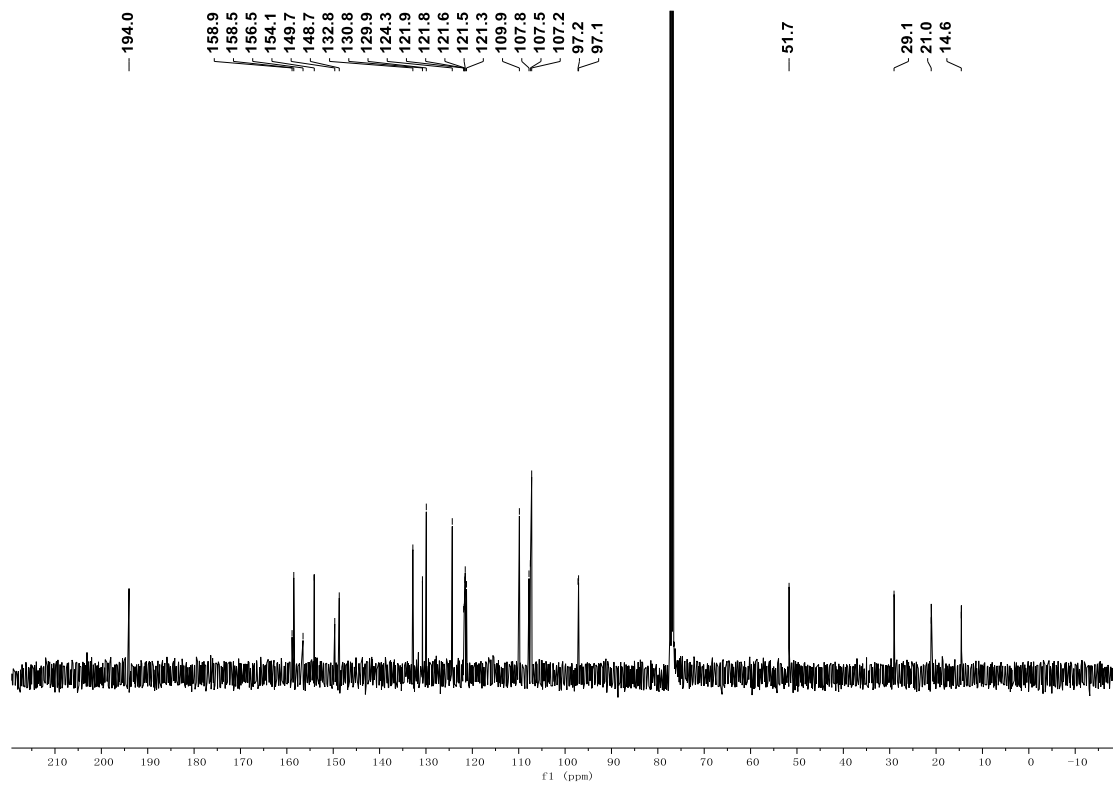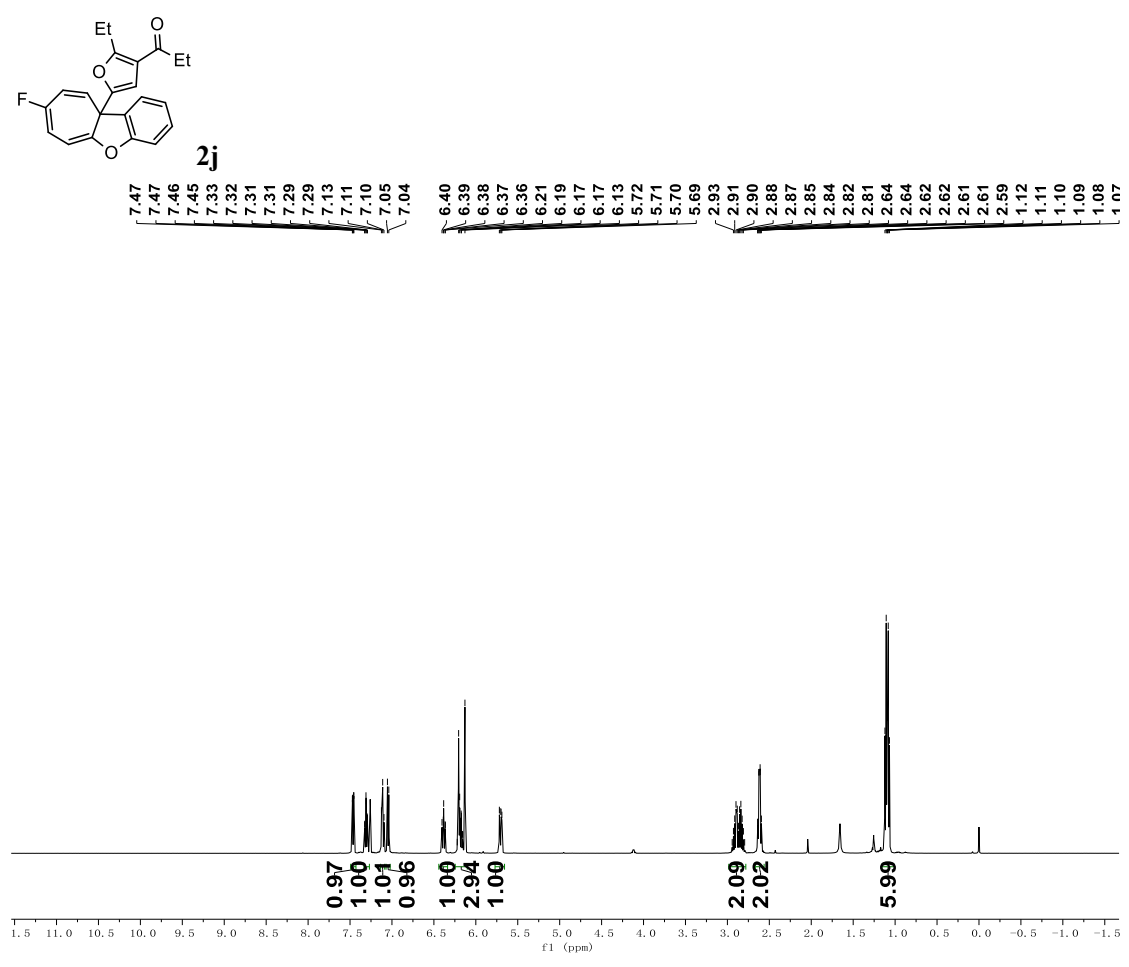



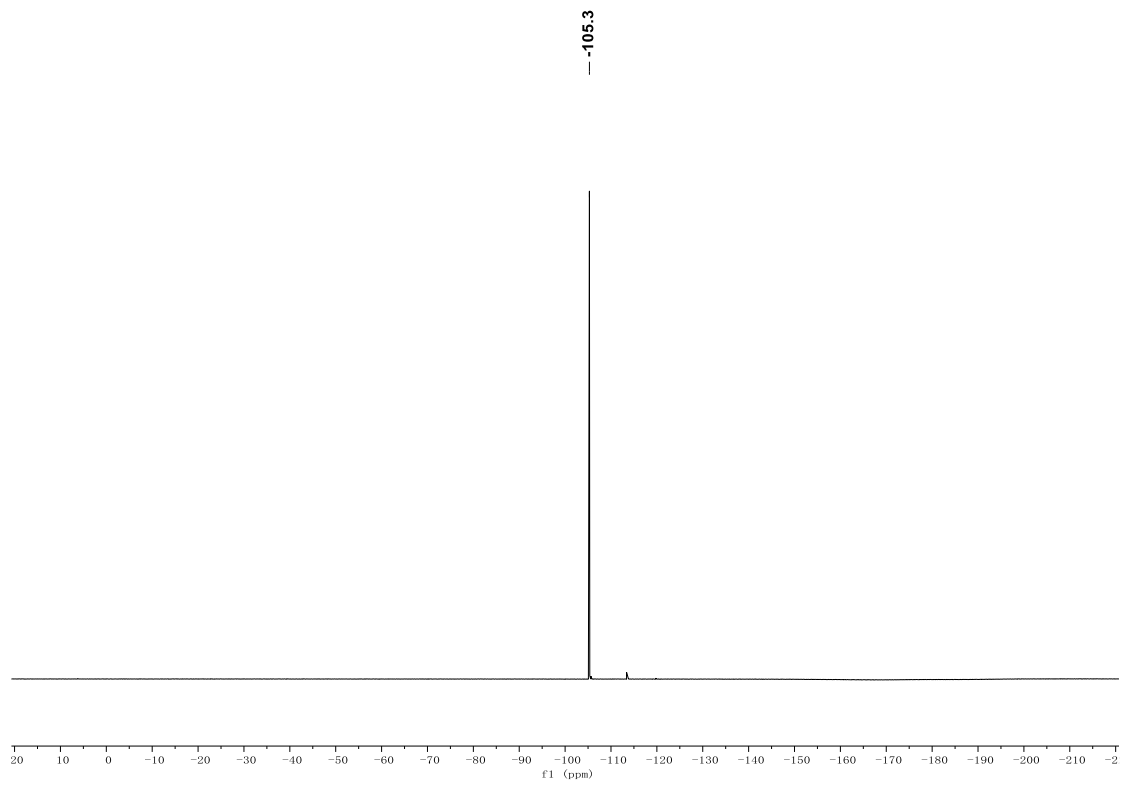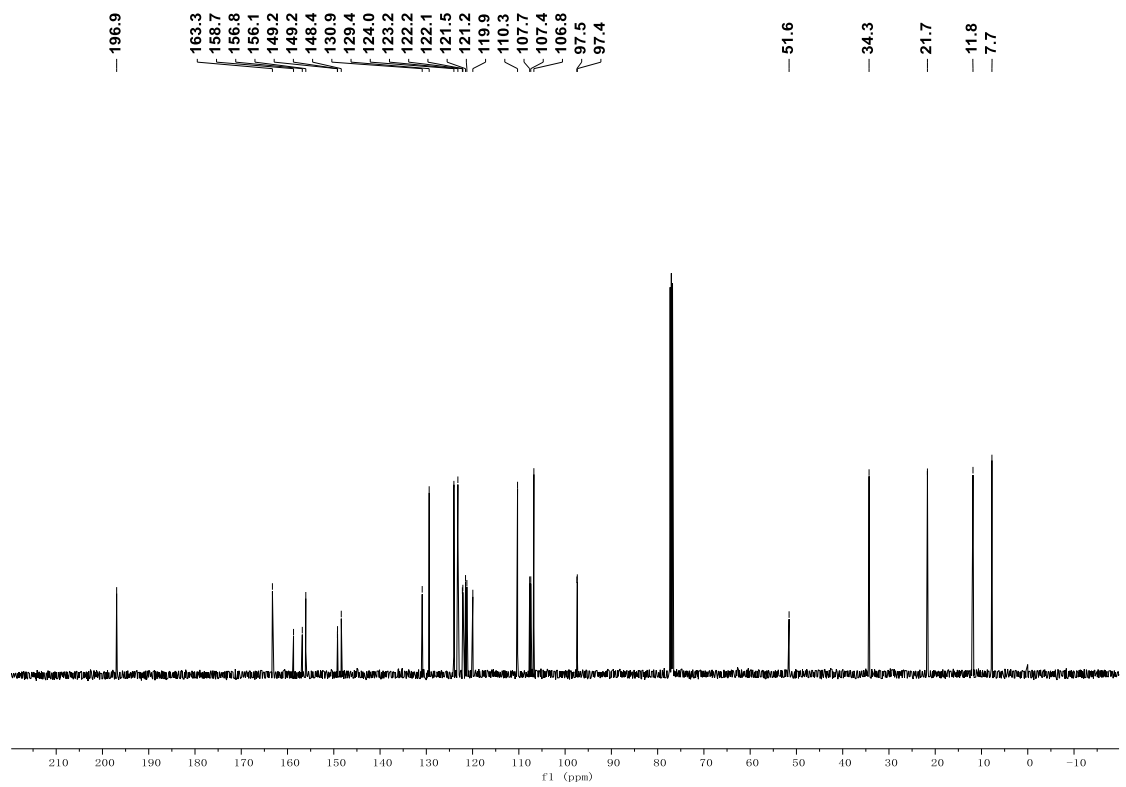

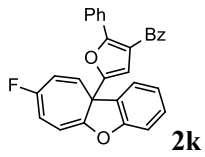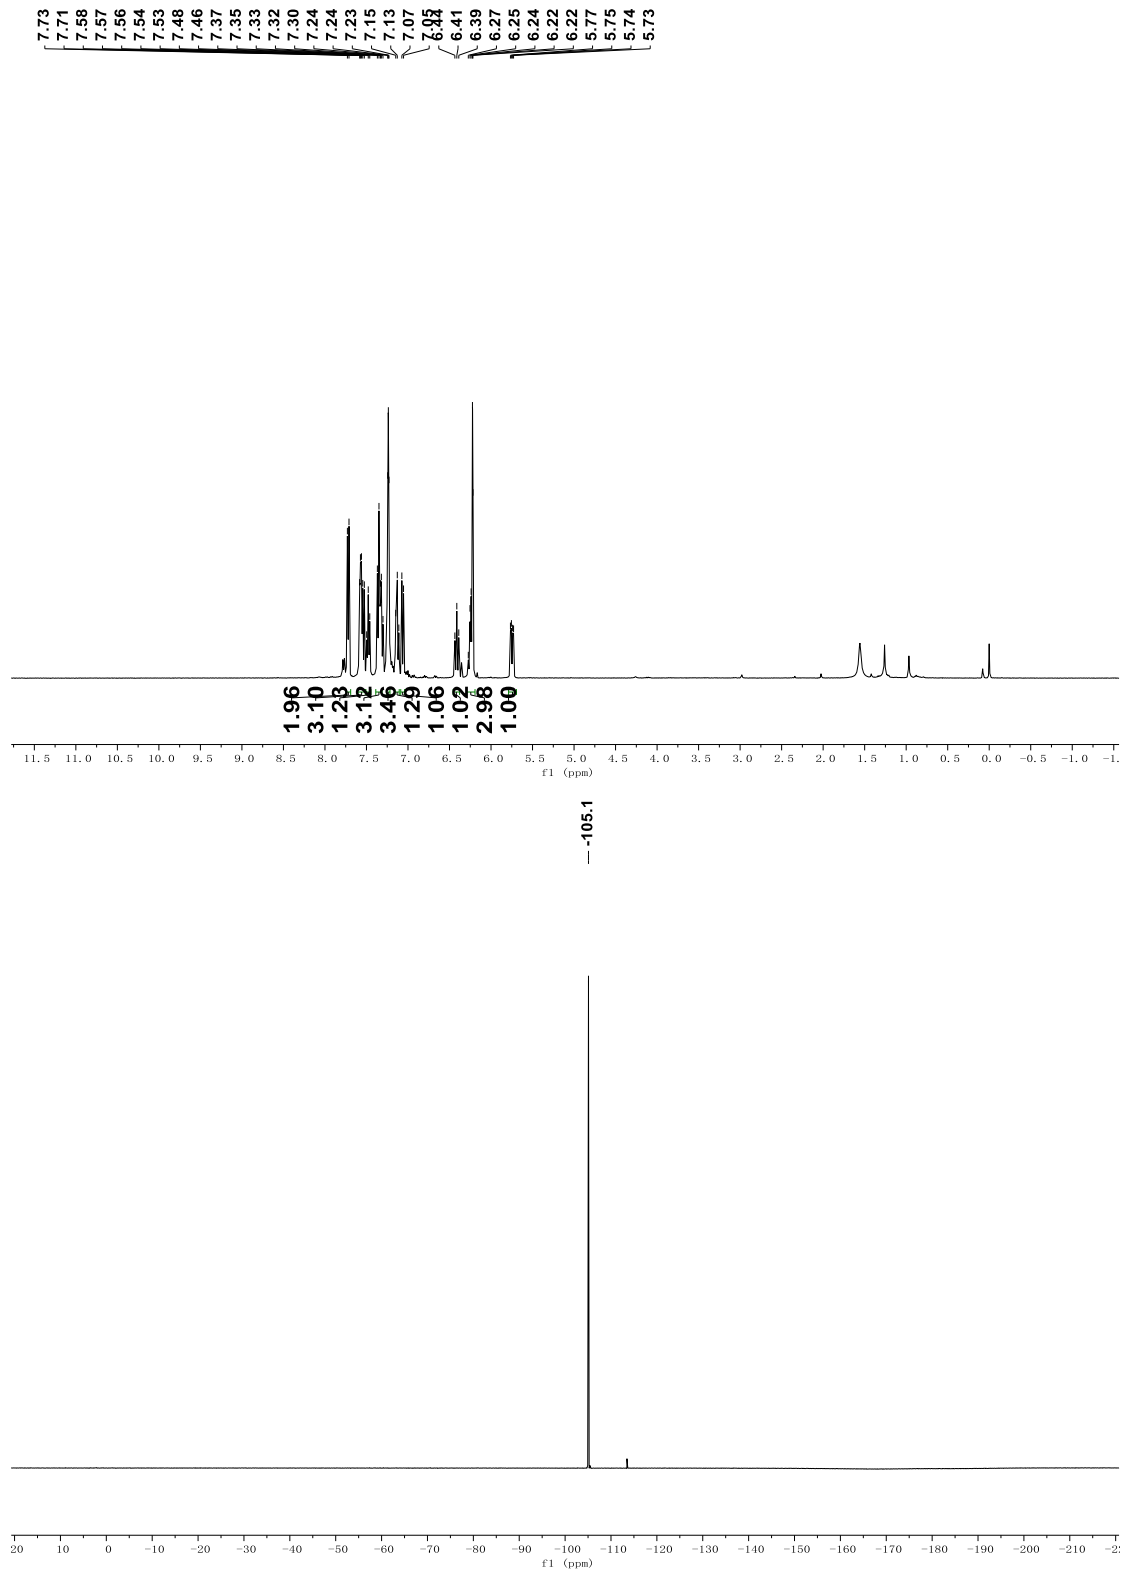

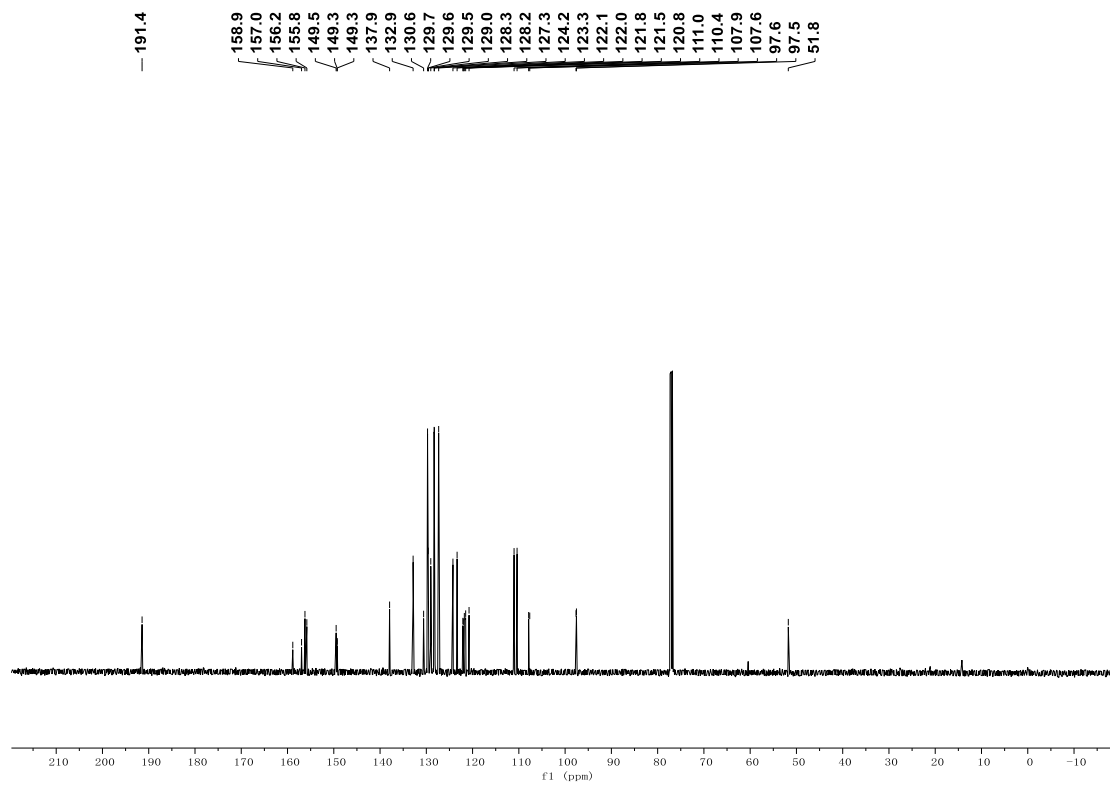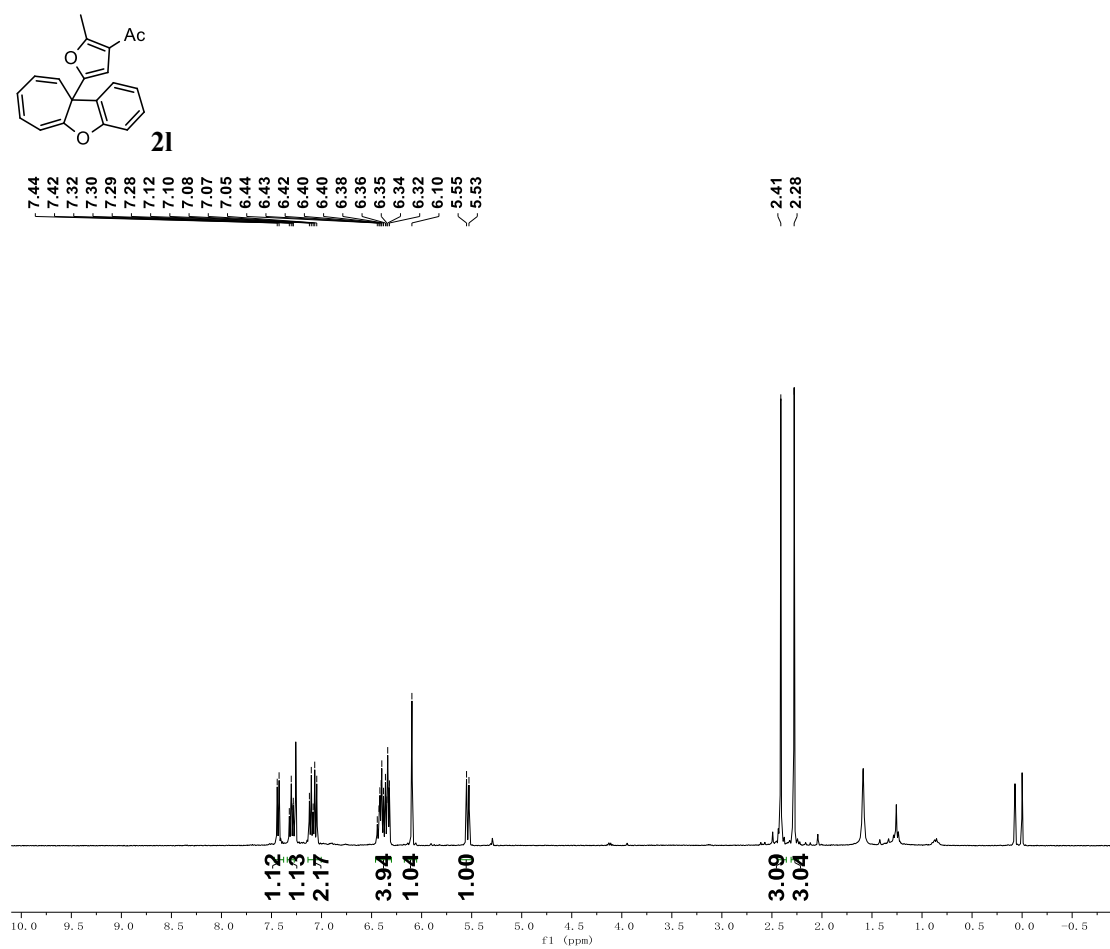

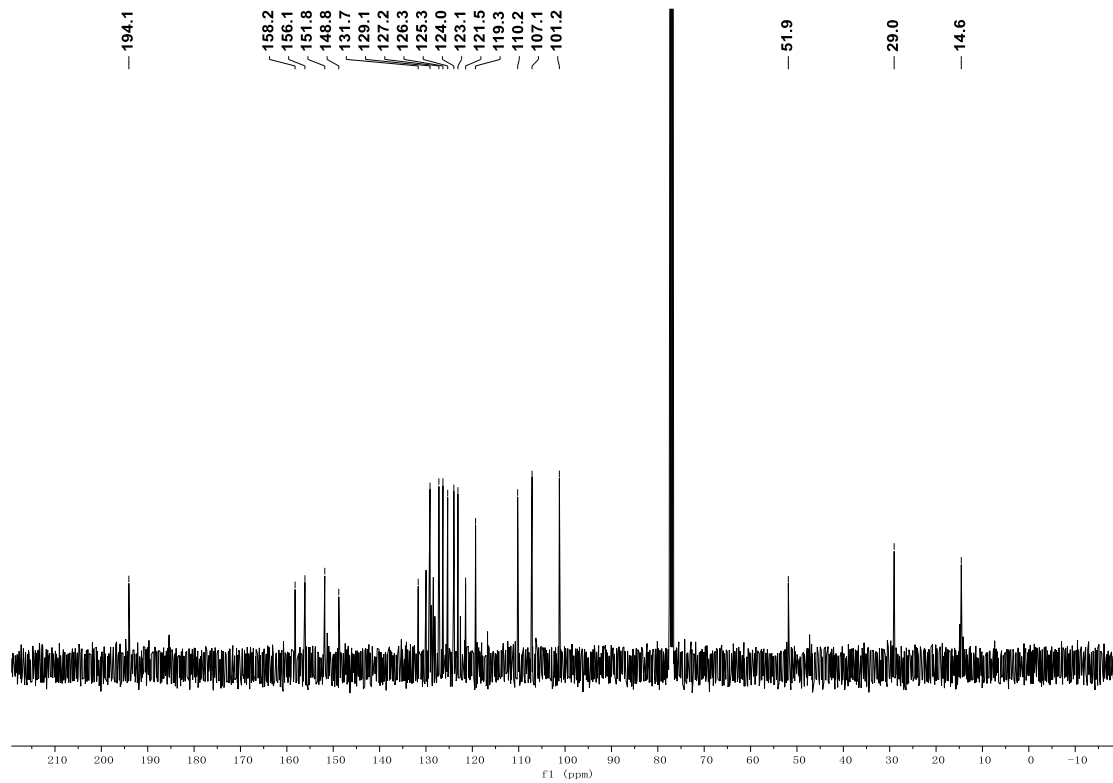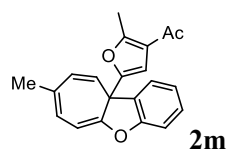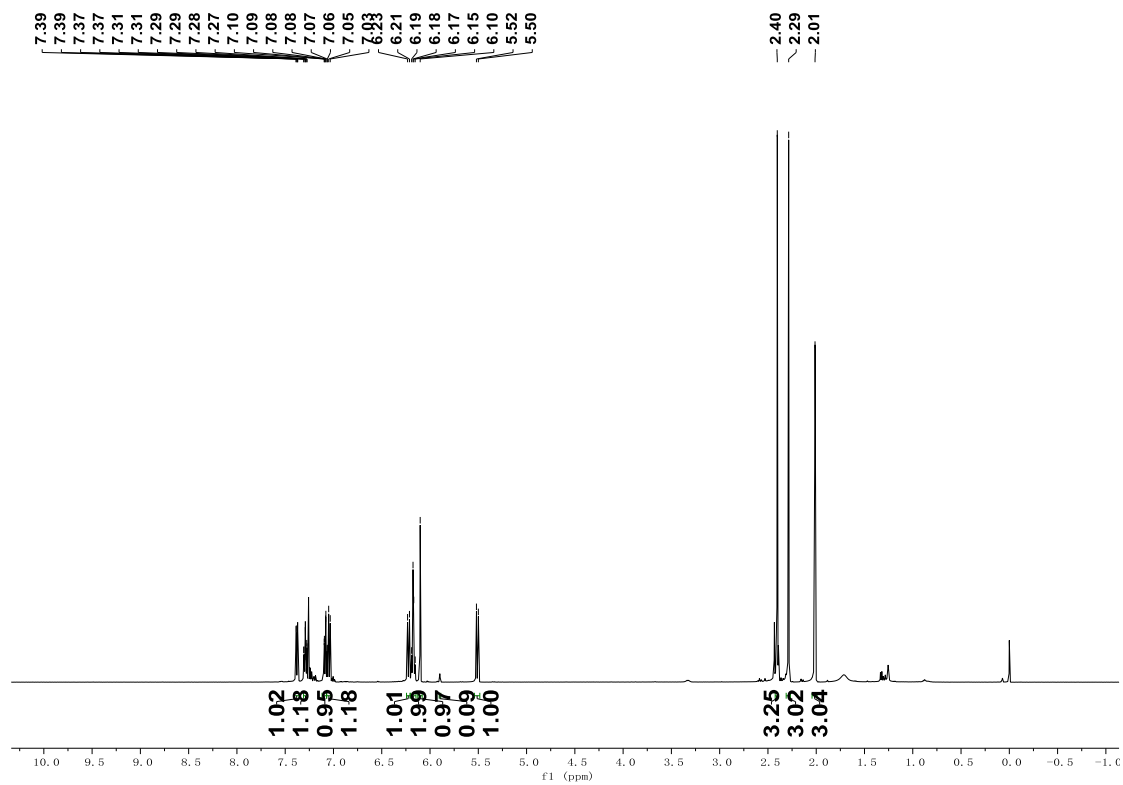

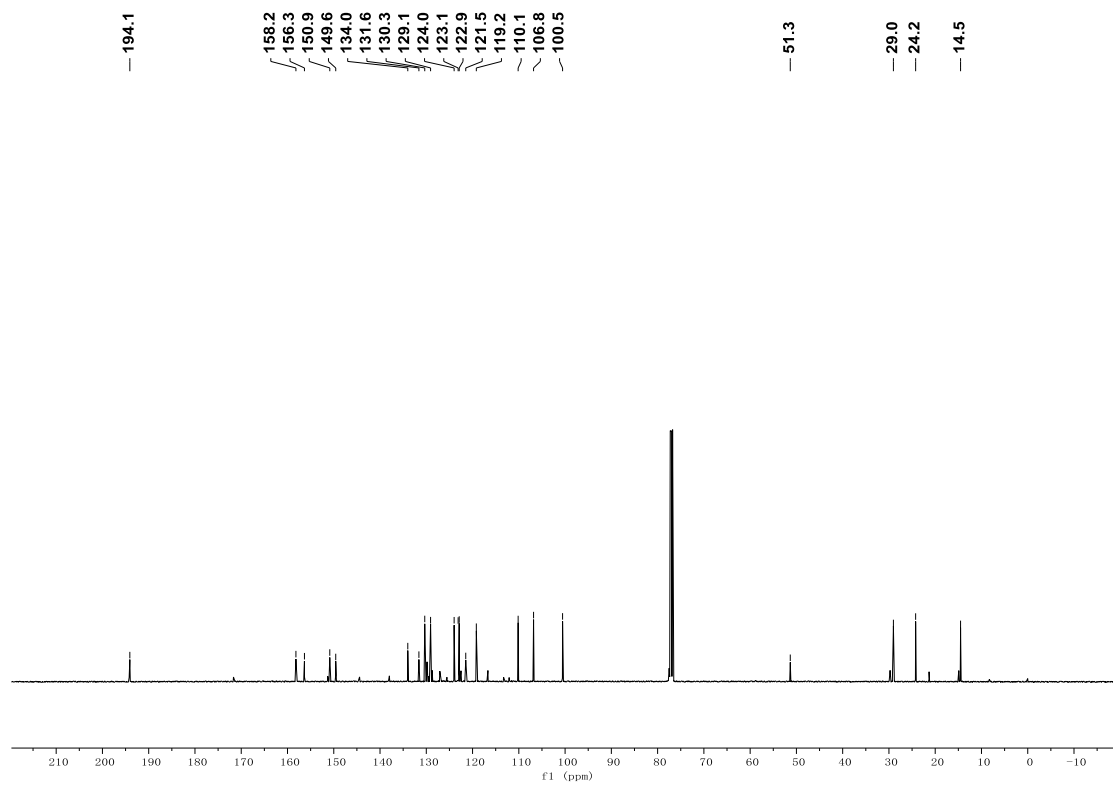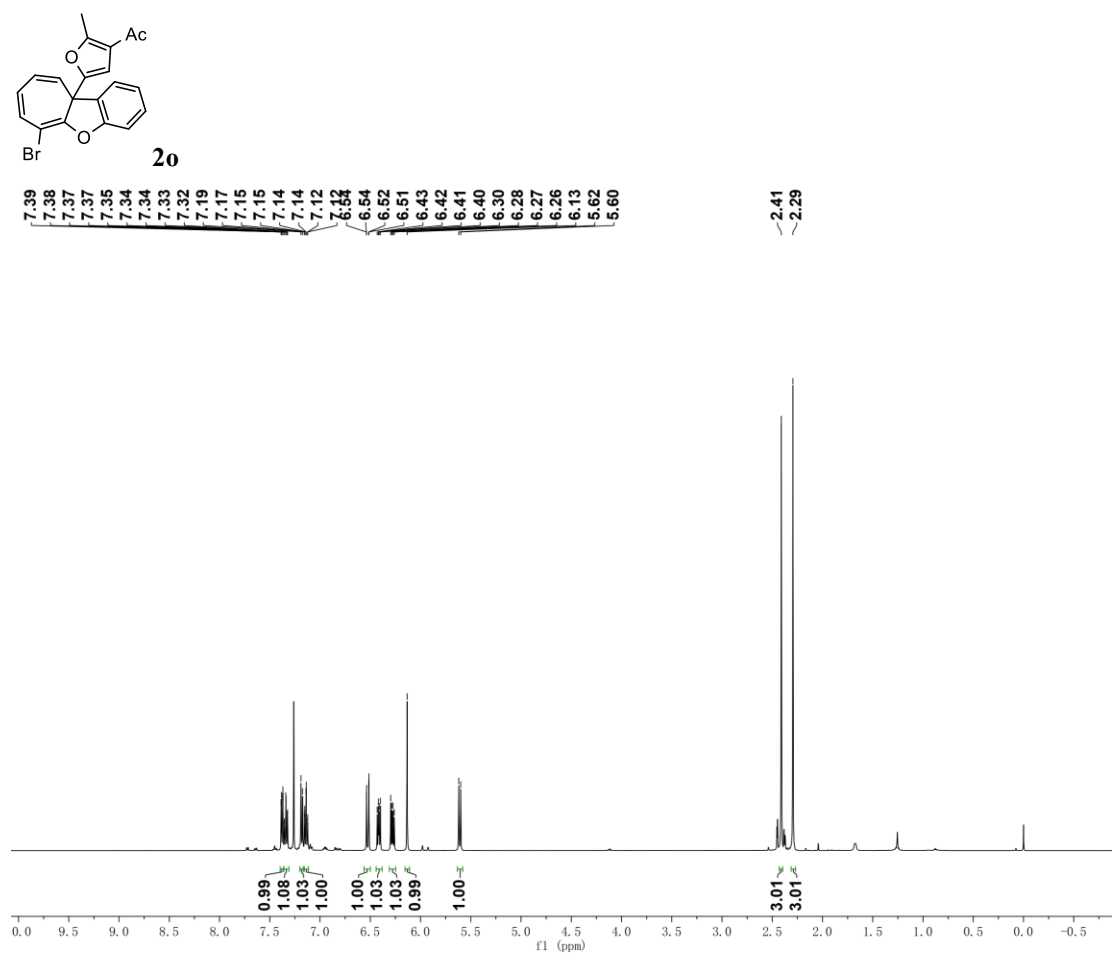

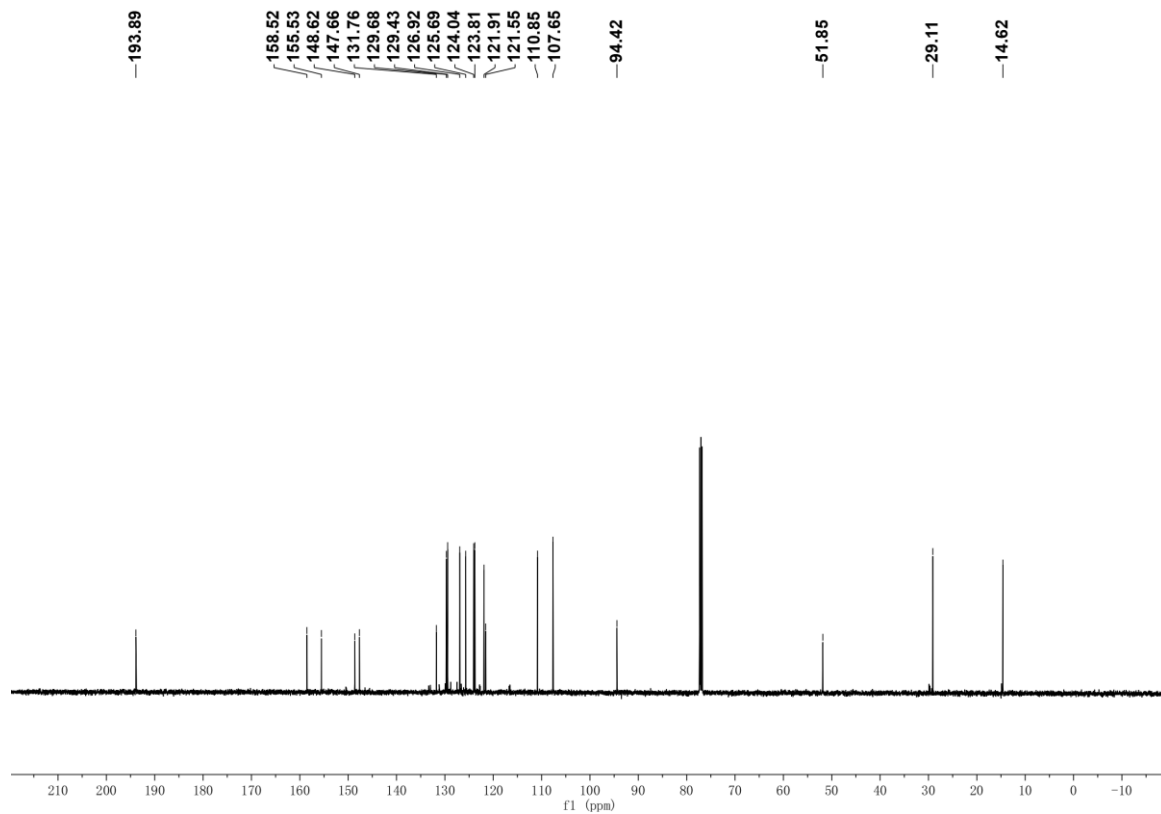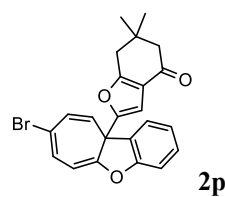

2p

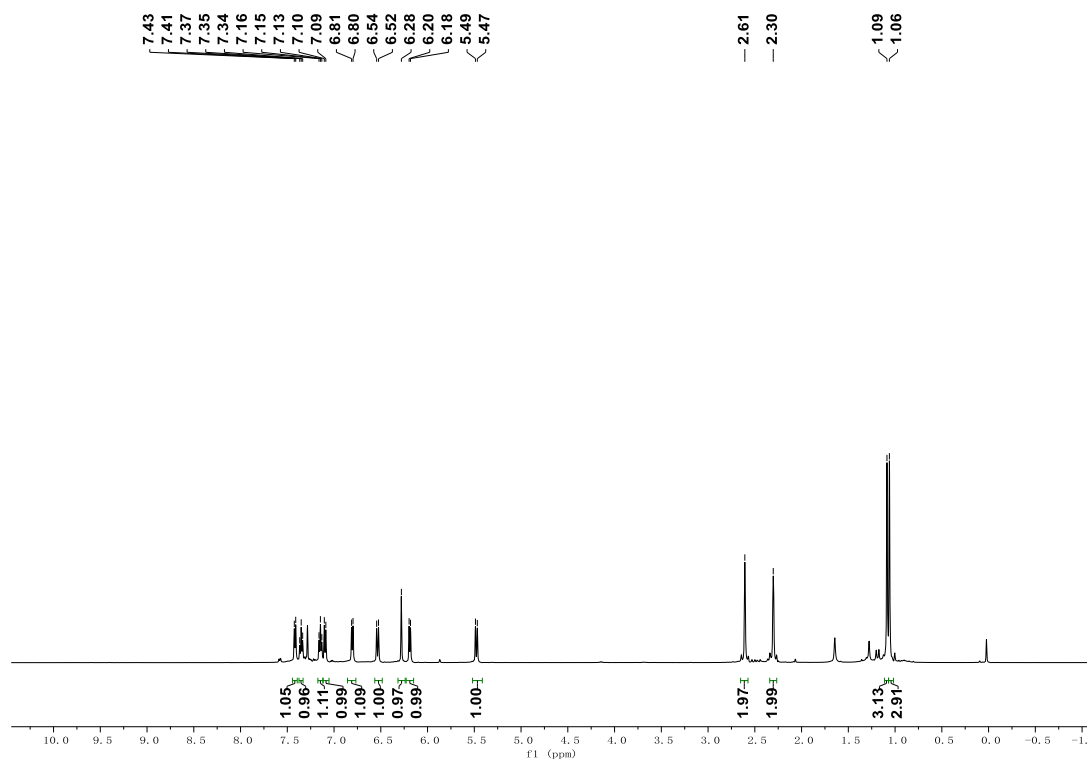

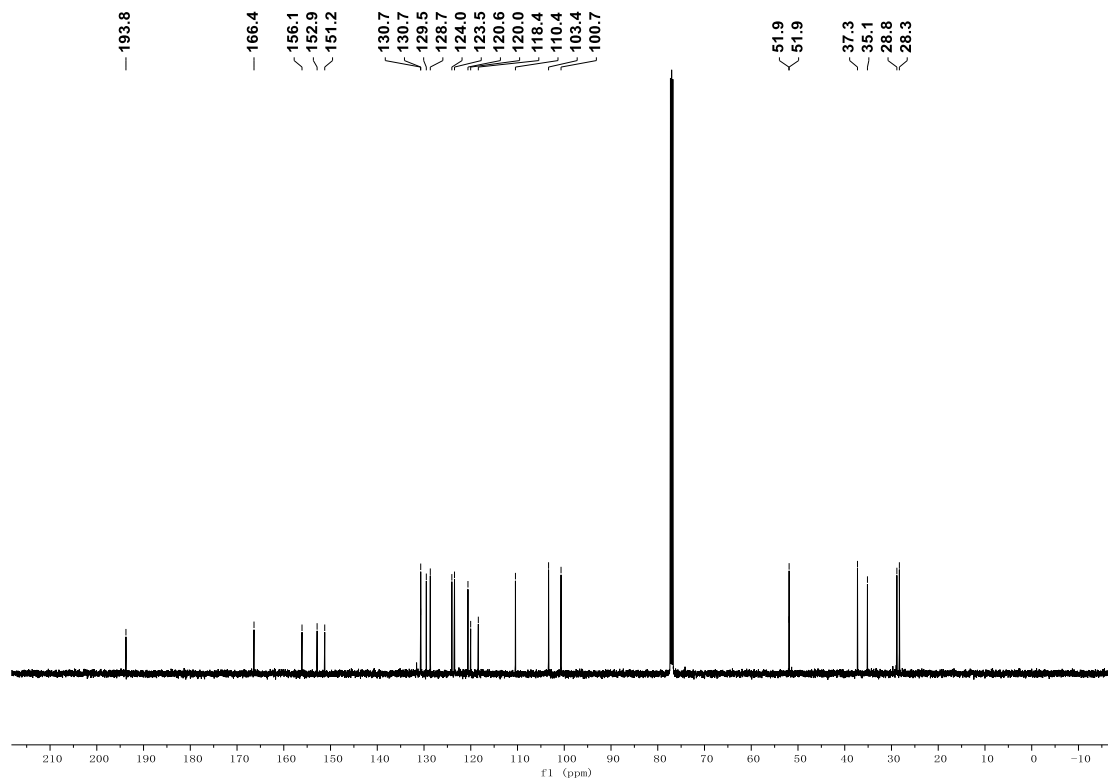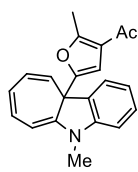

**2q** [catalyzed by  $\text{Rh}_2(\text{S-BTPCP})_4$  and  $\text{Rh}_2(\text{TFA})_4$ ]

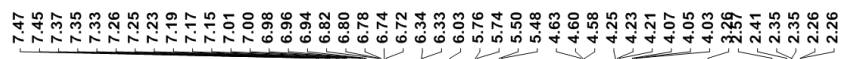

catalyzed by  $\text{Rh}_2(\text{S-BTPCP})_4$

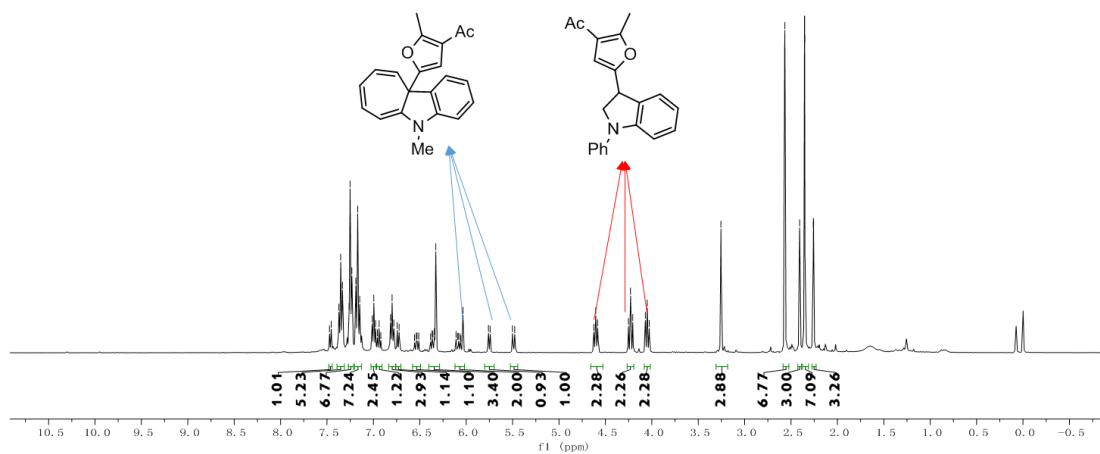

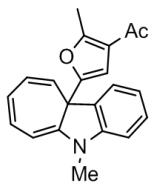

catalyzed by  $\text{Rh}_2(\text{TFA})_4$

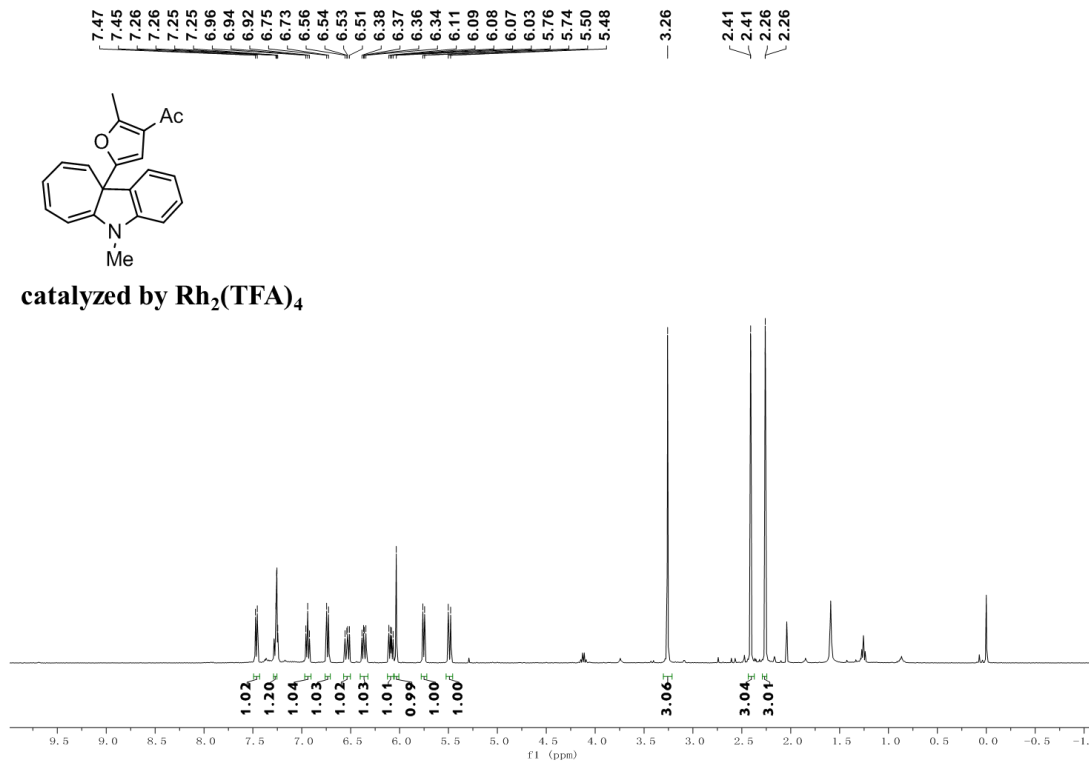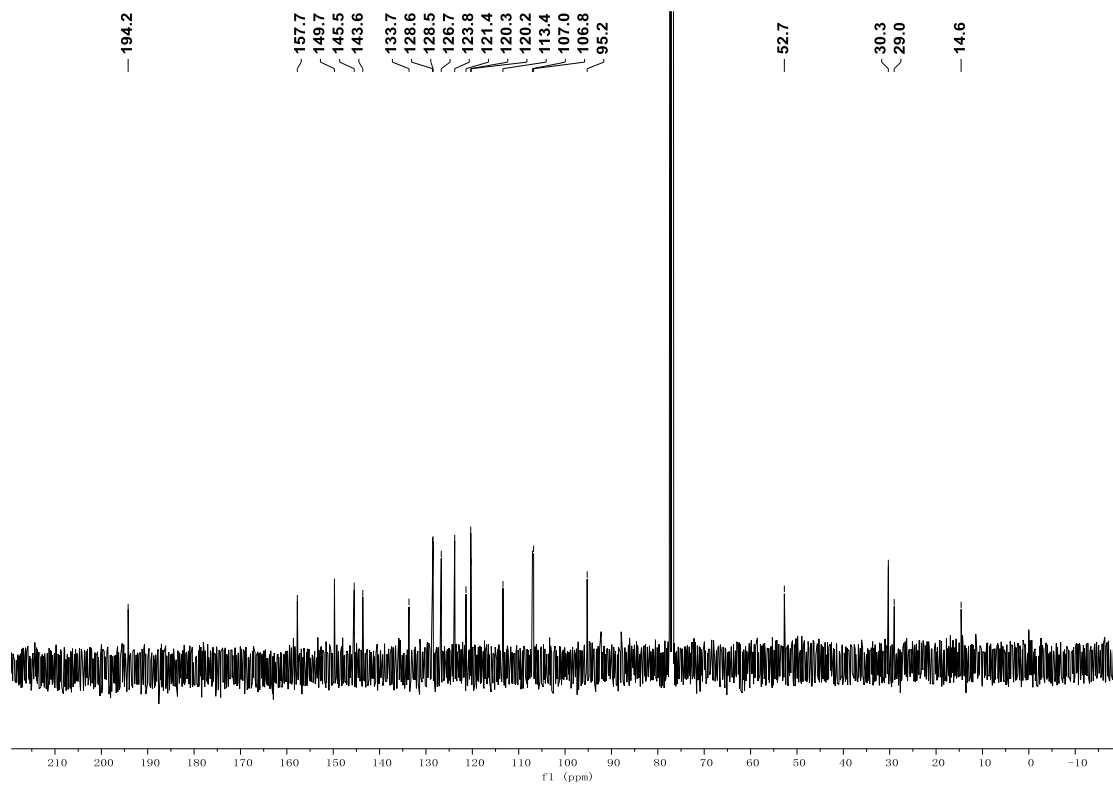



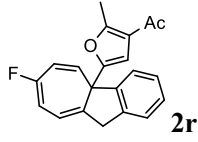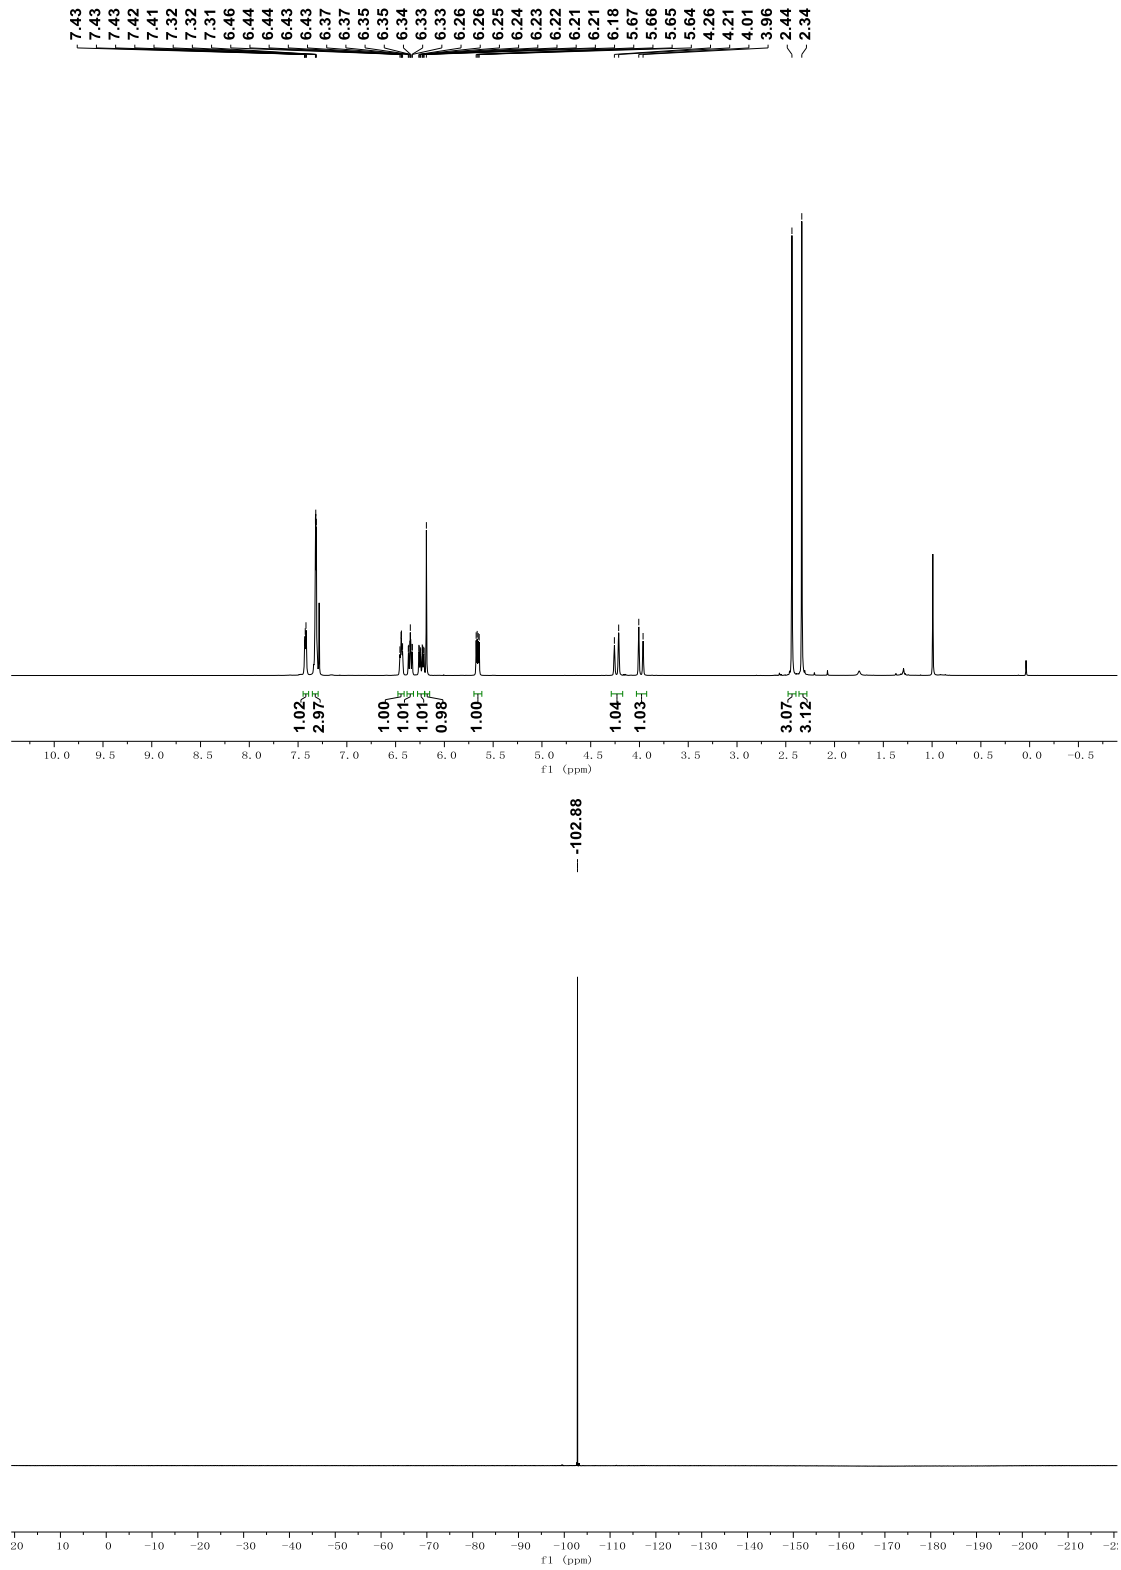

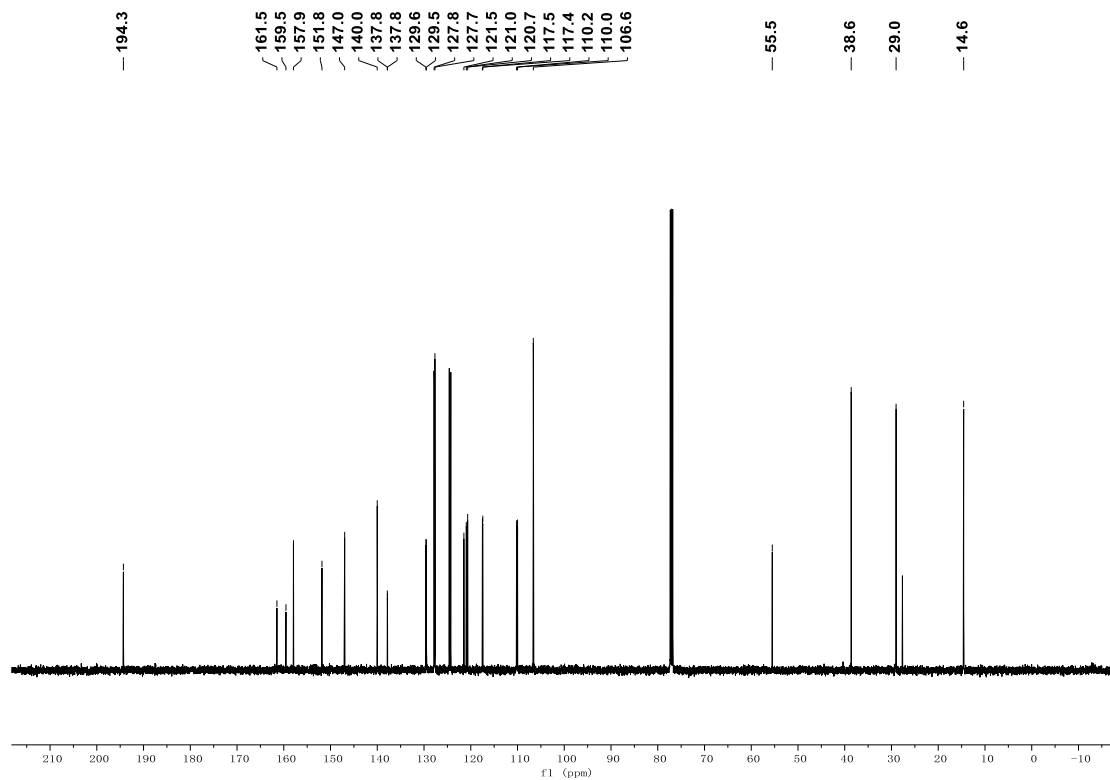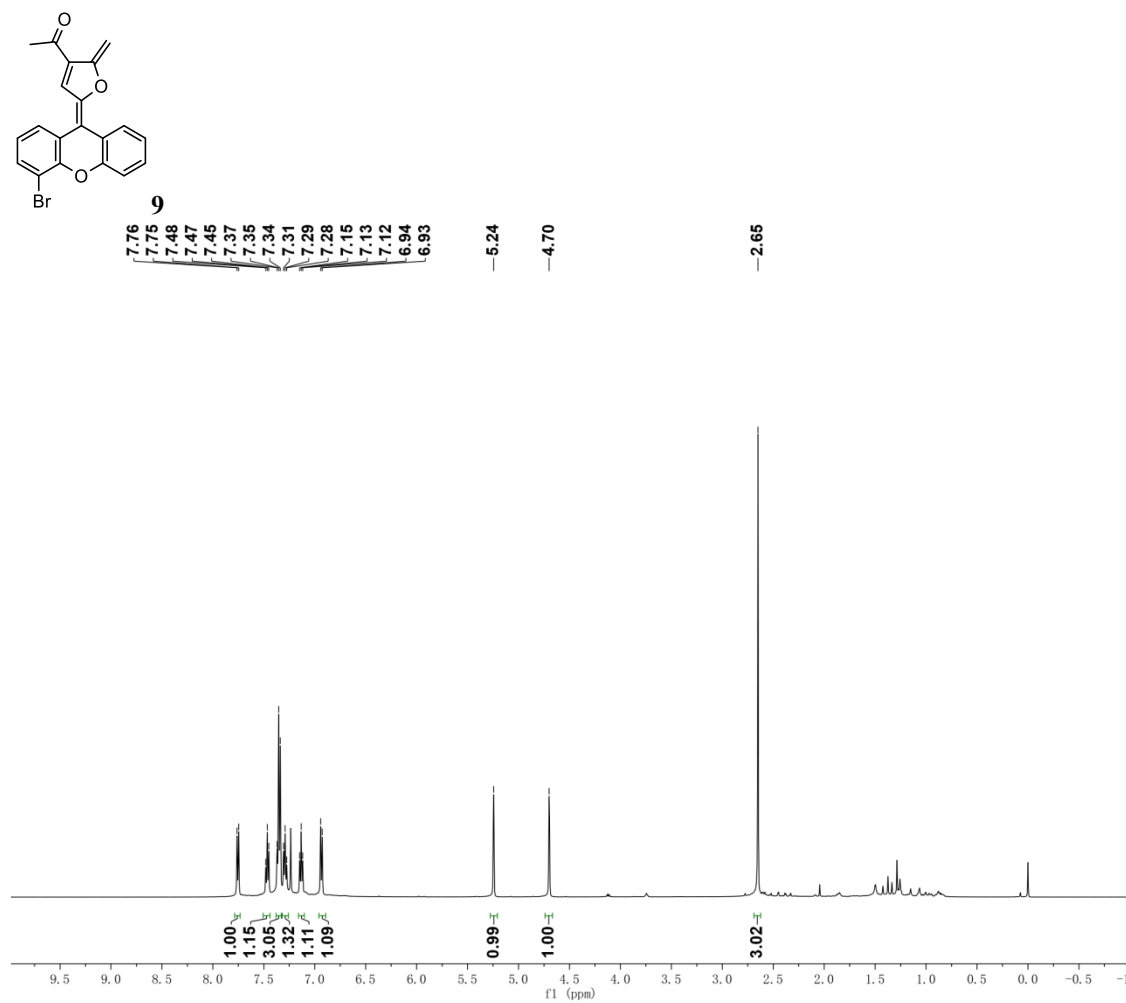

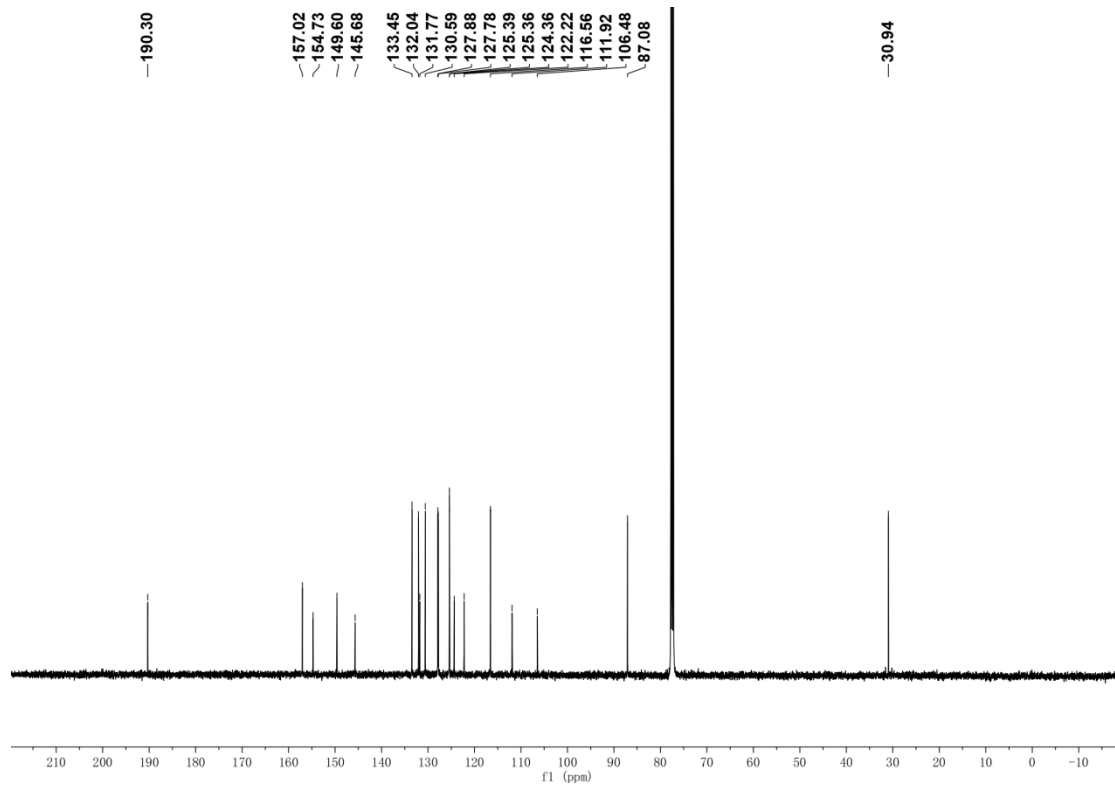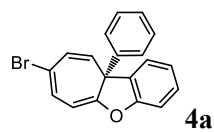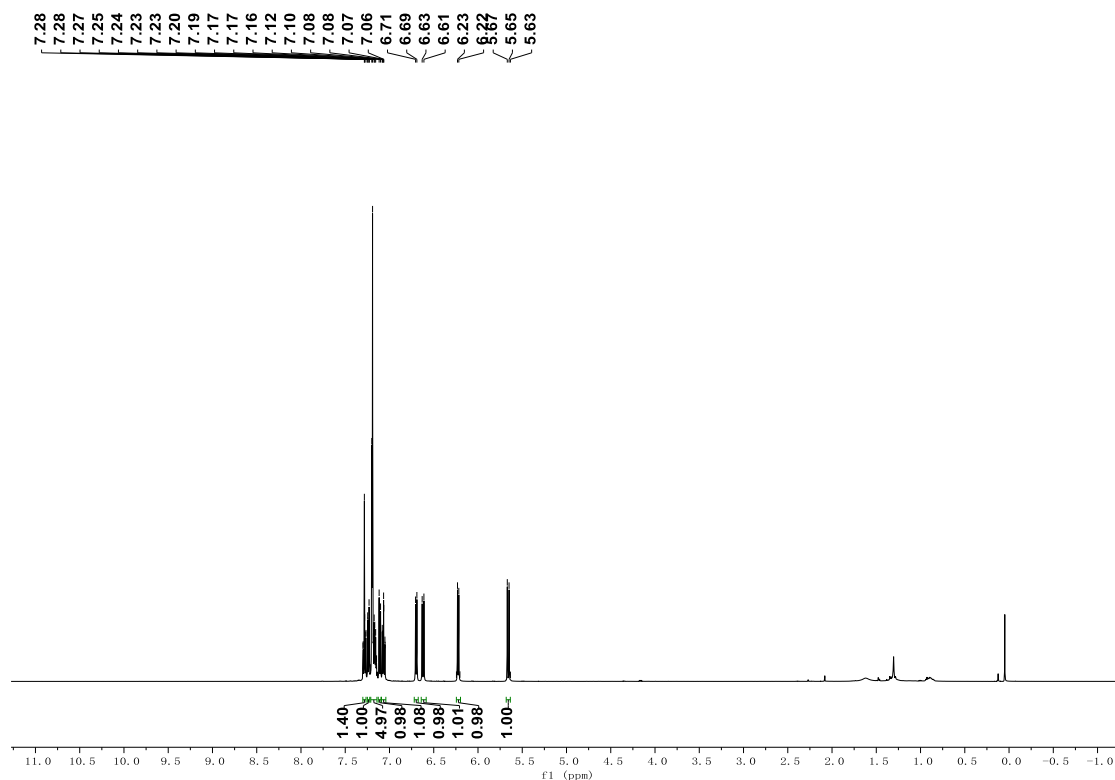

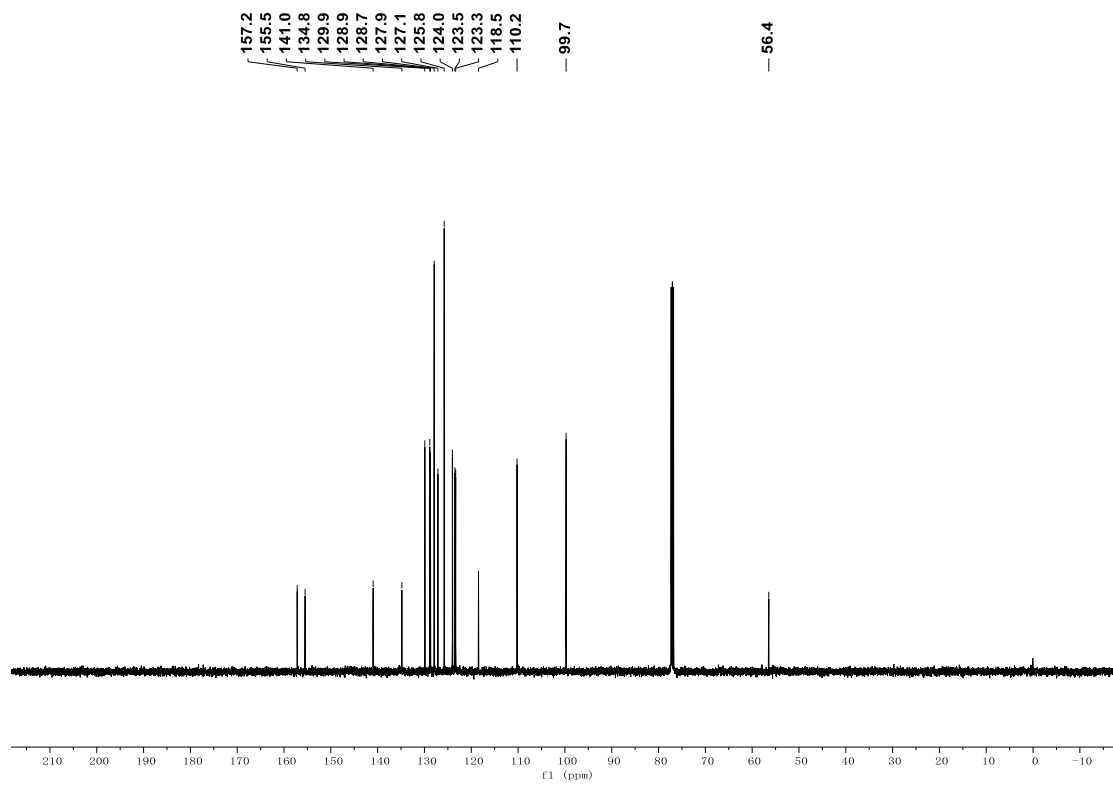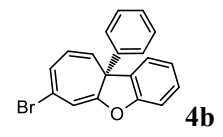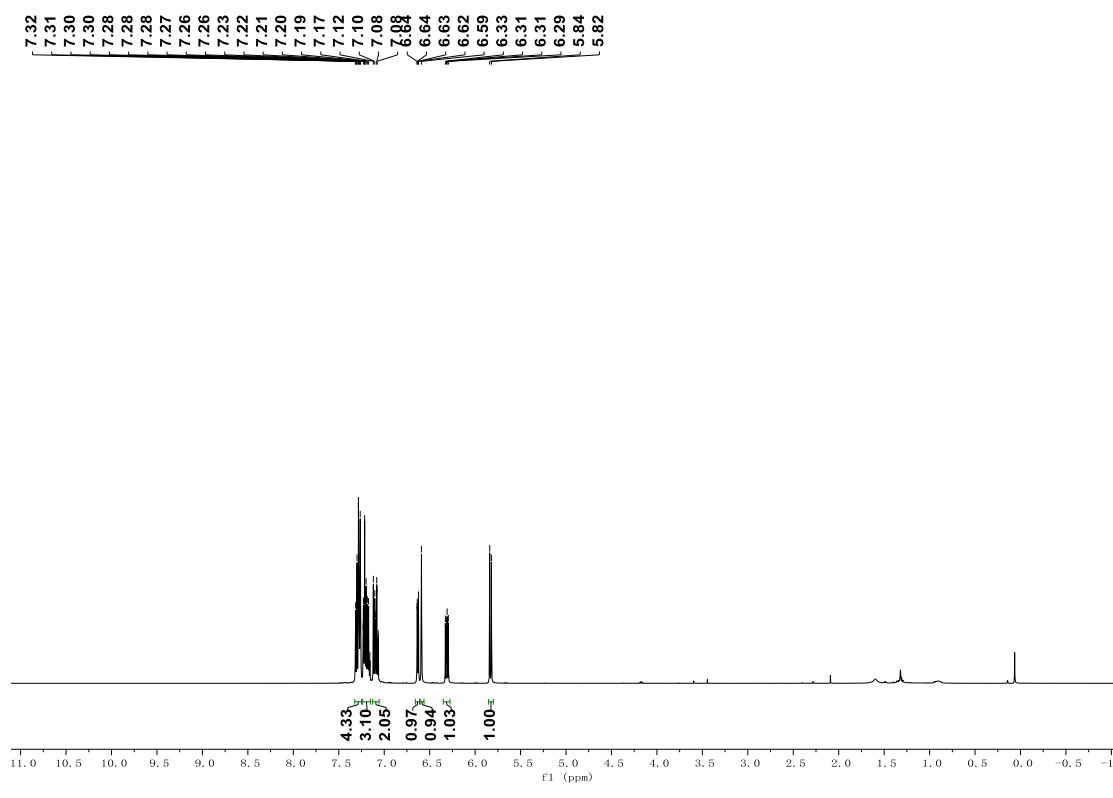

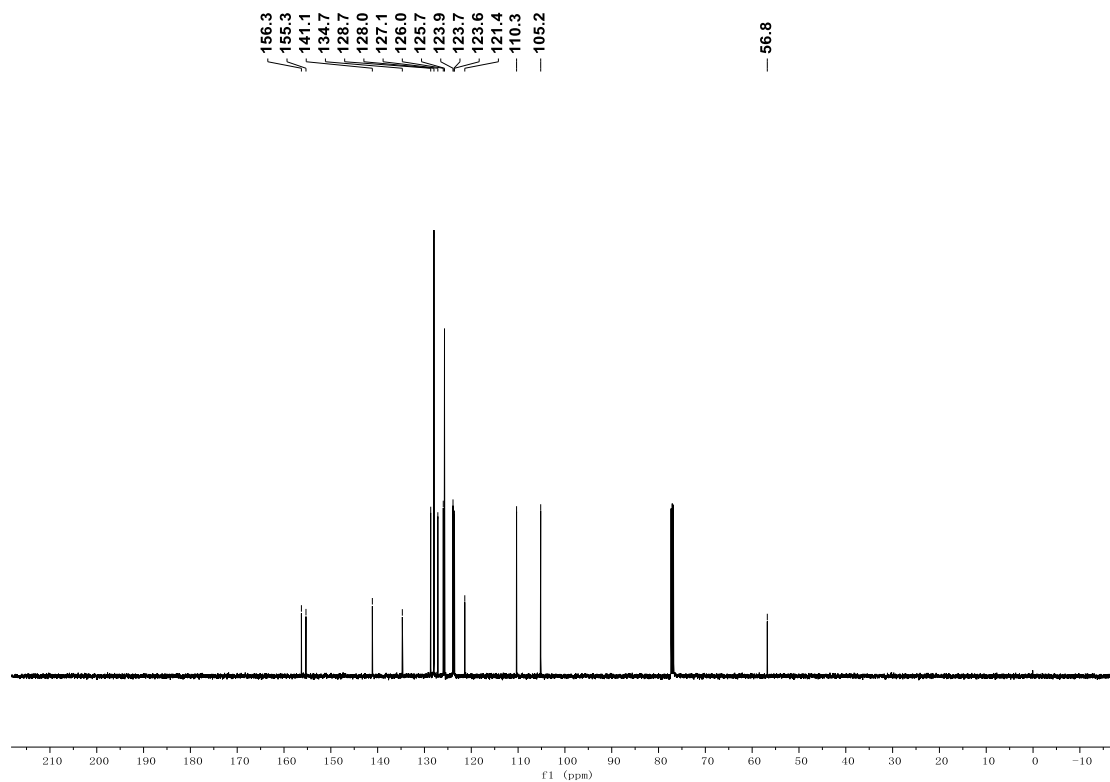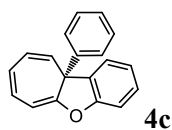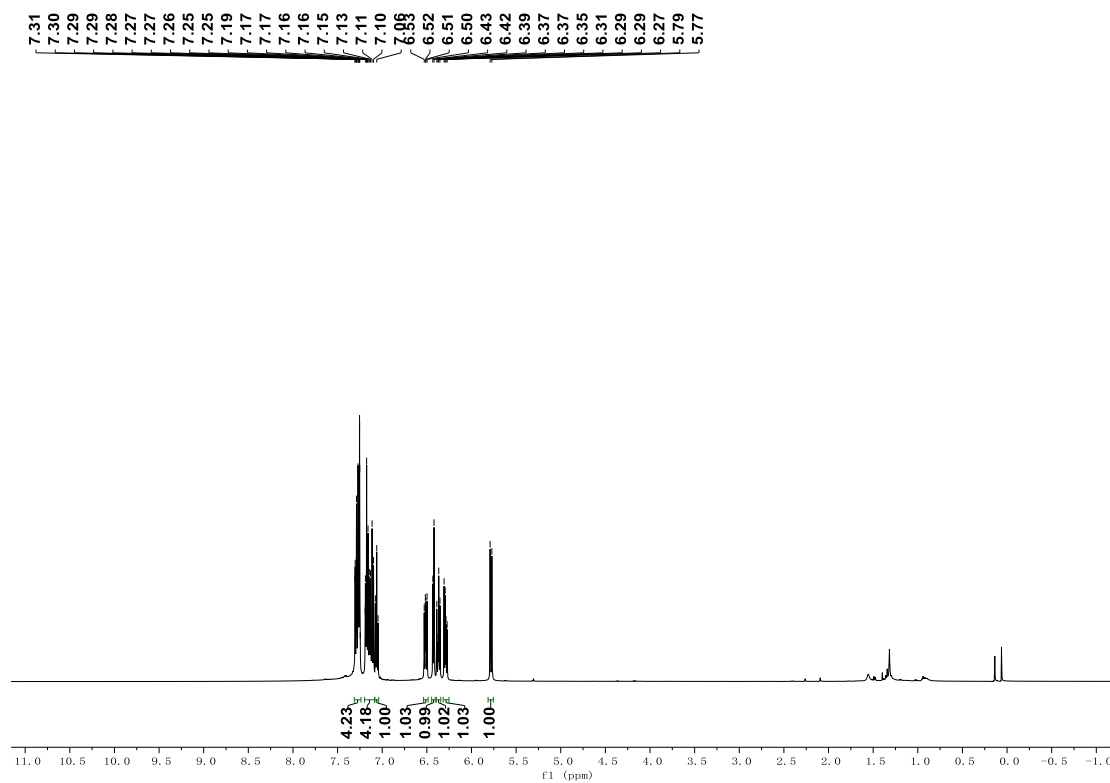

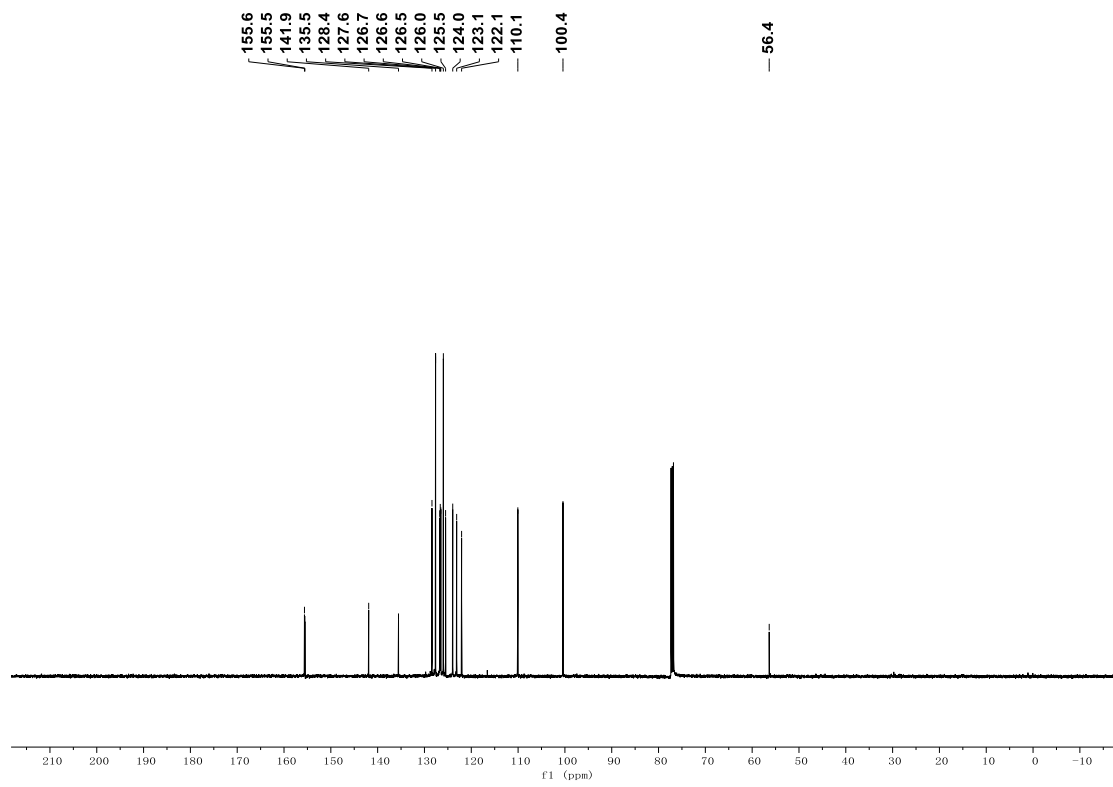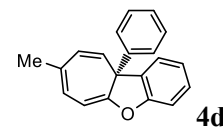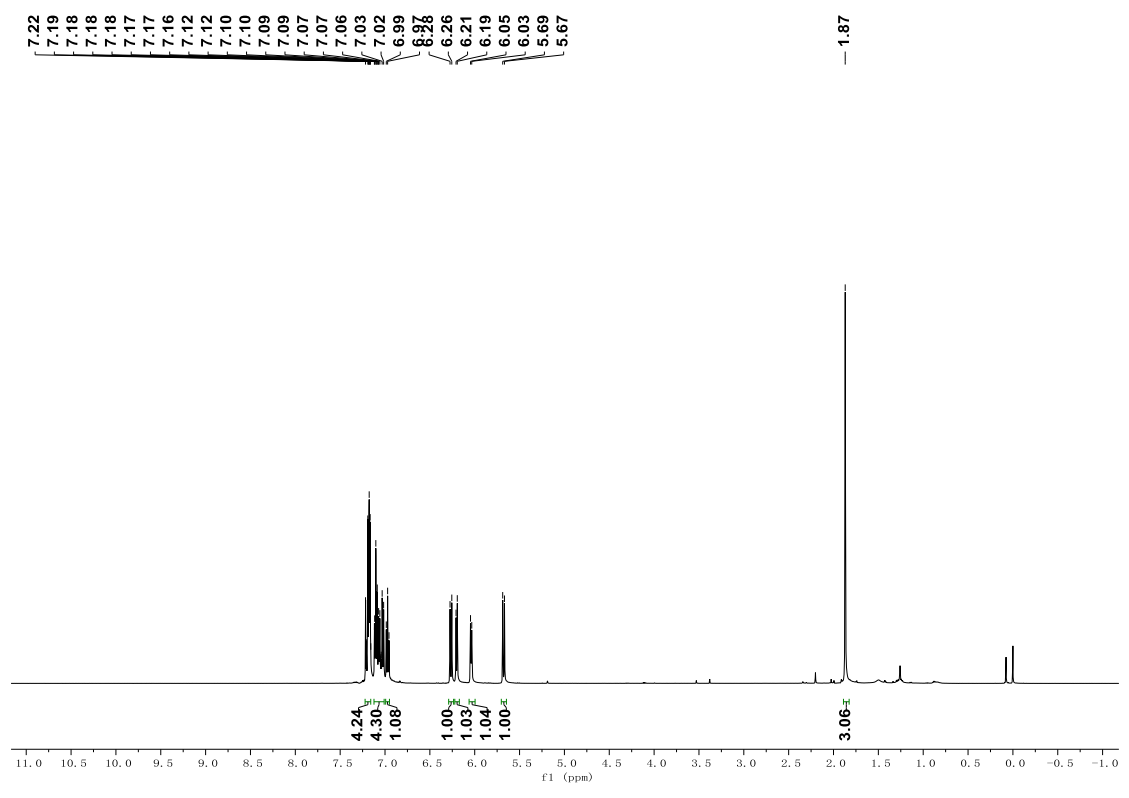

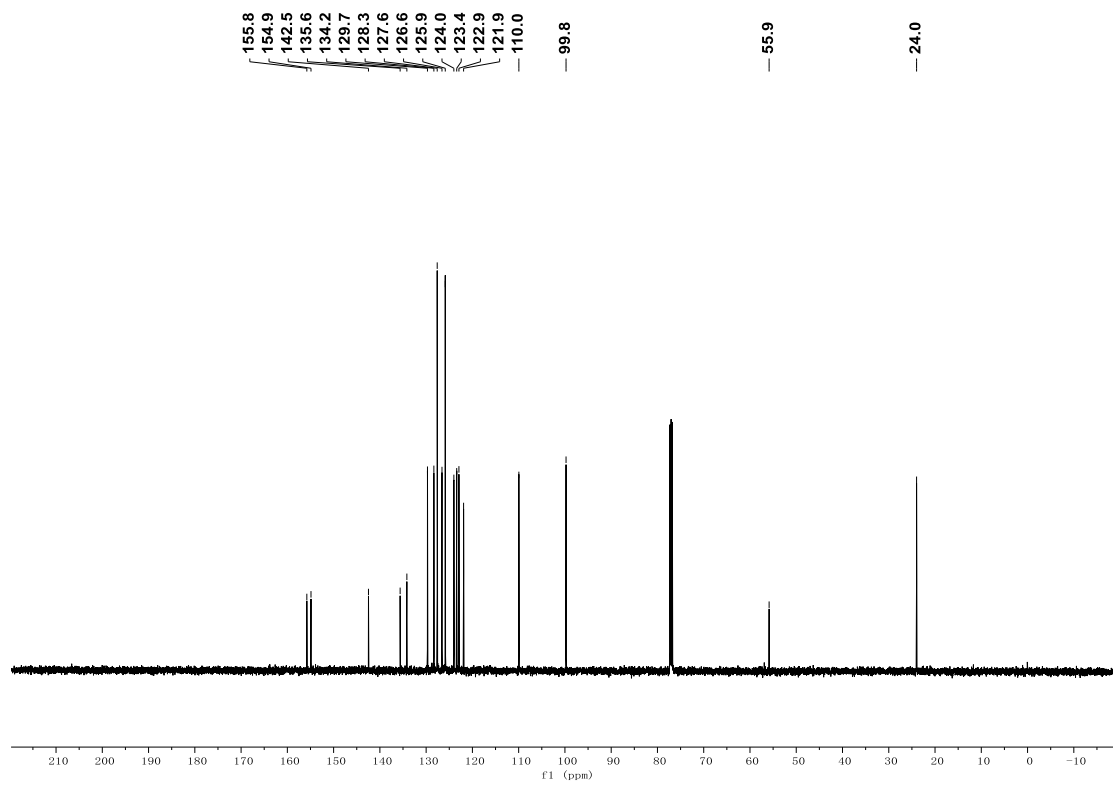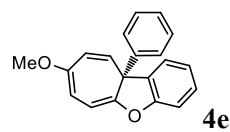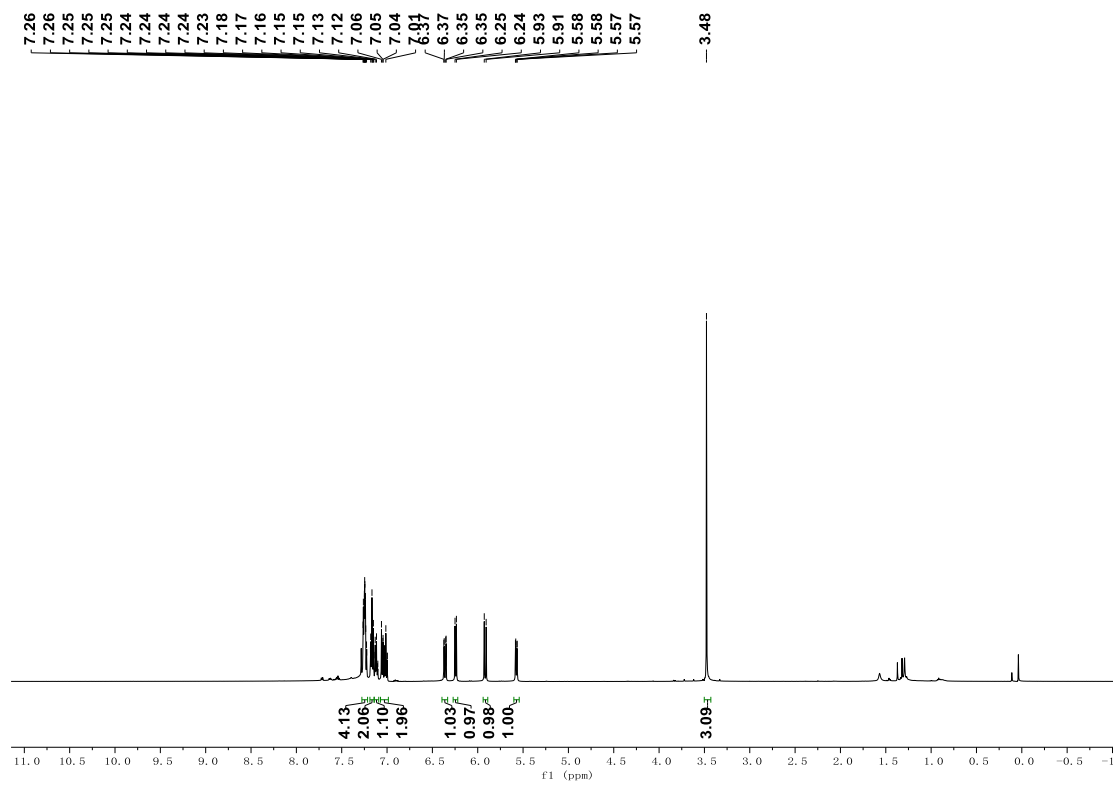

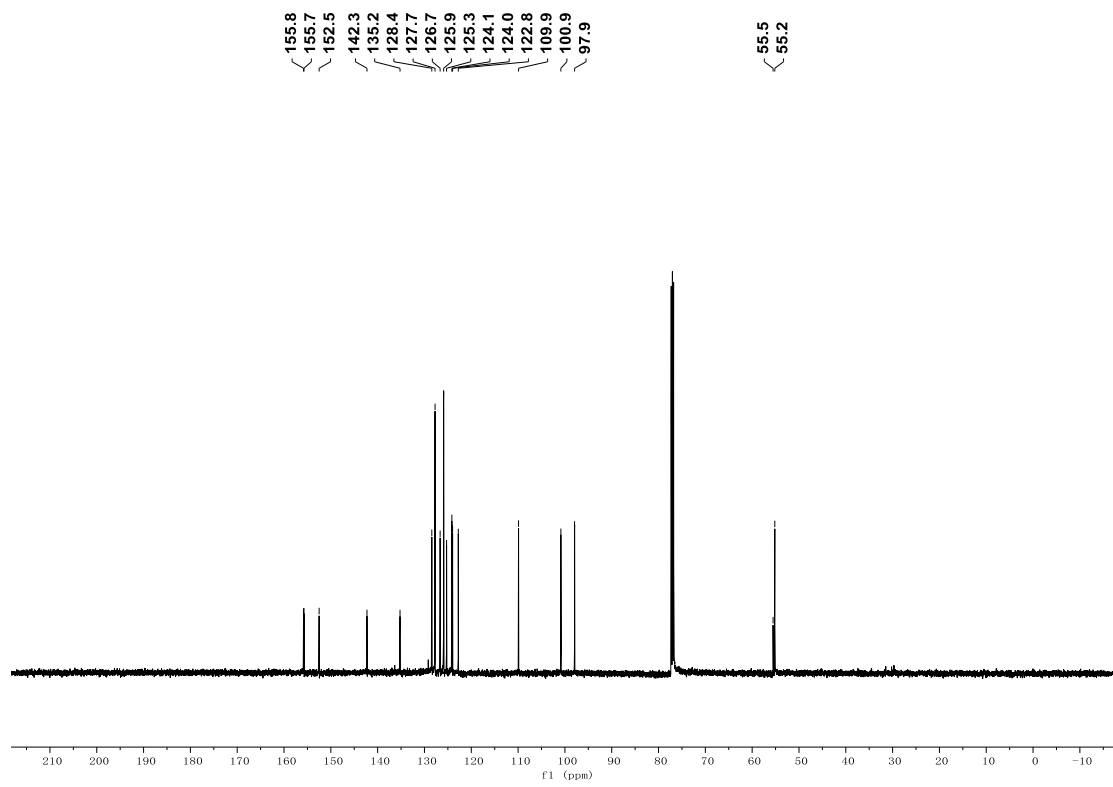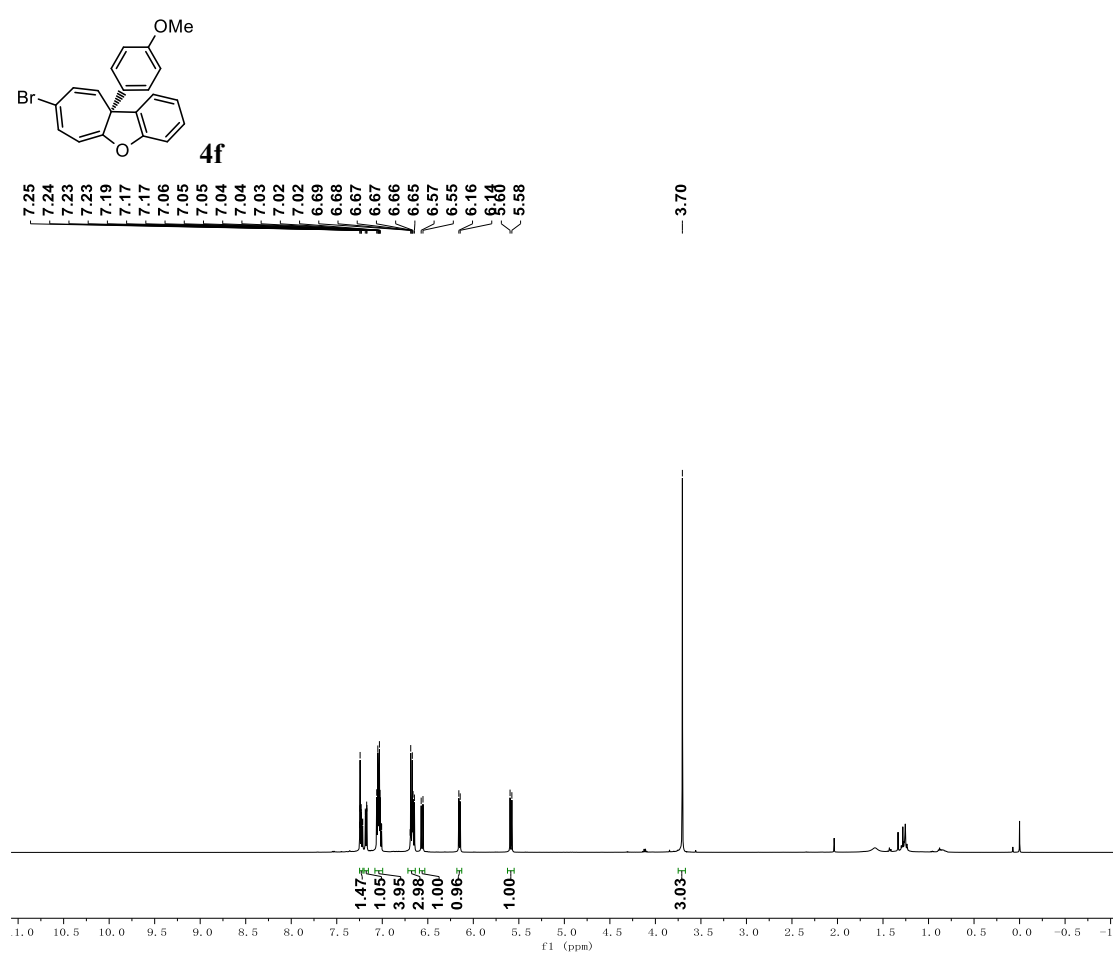



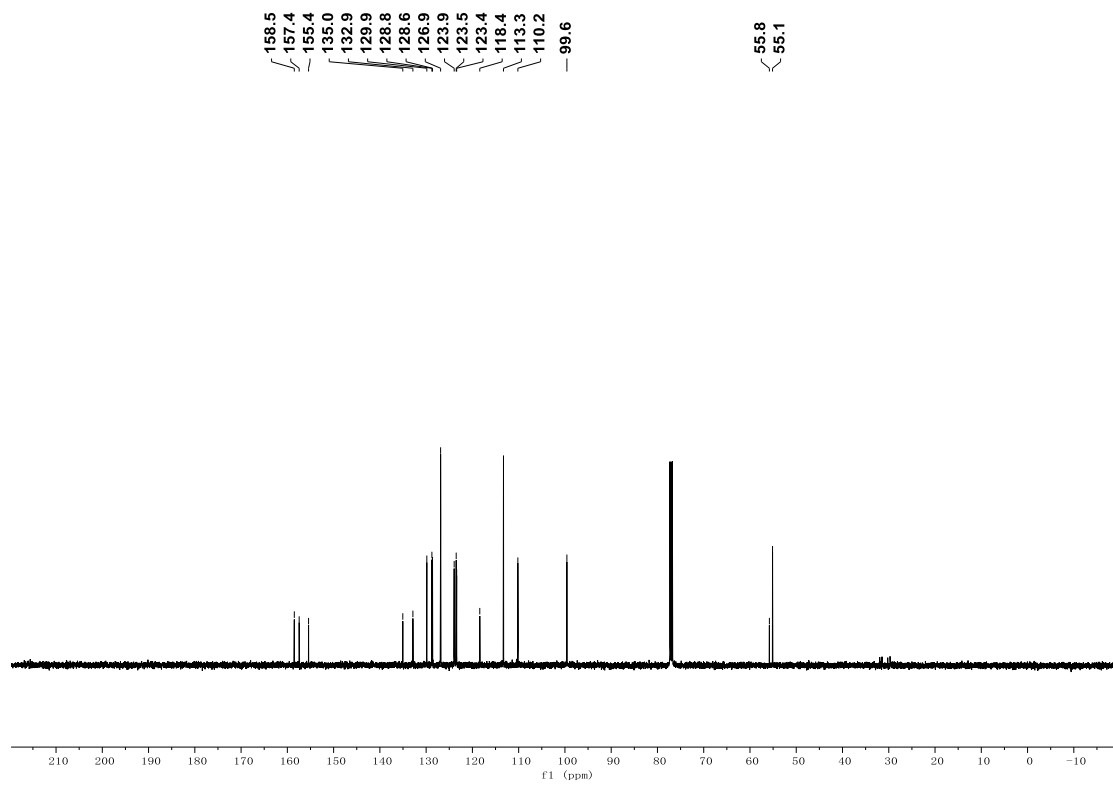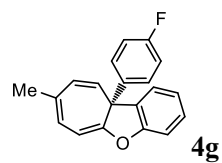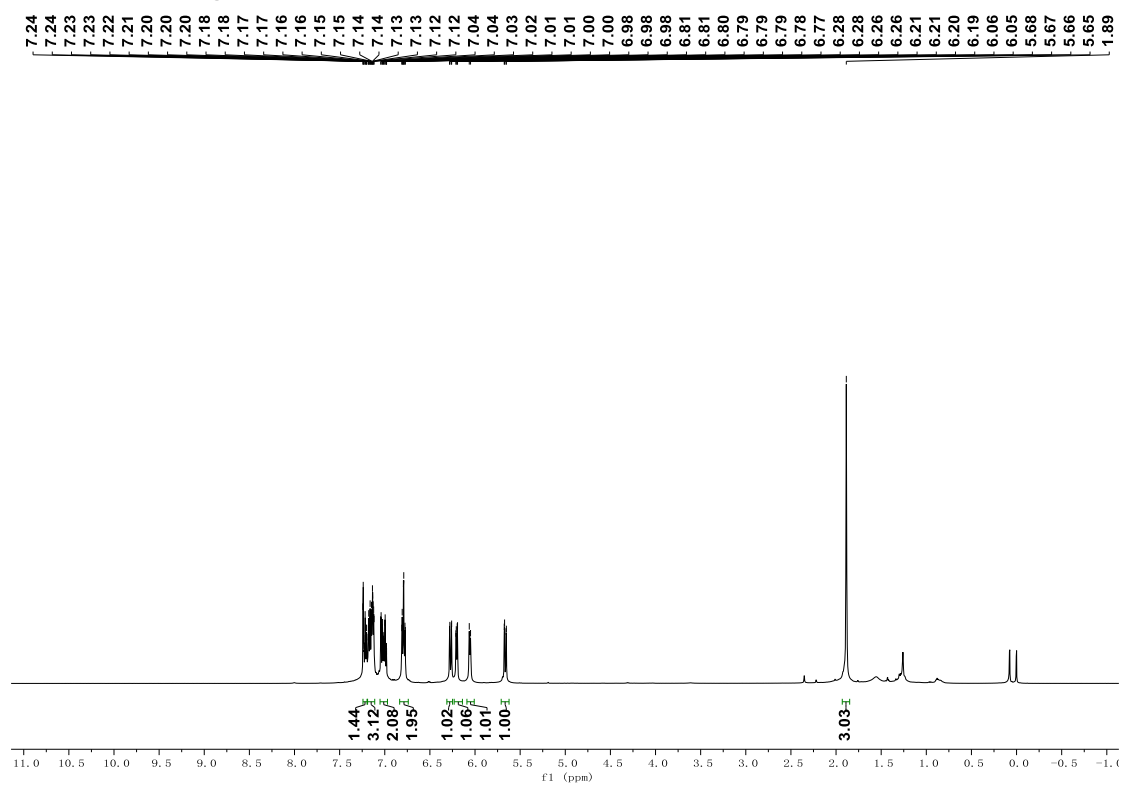

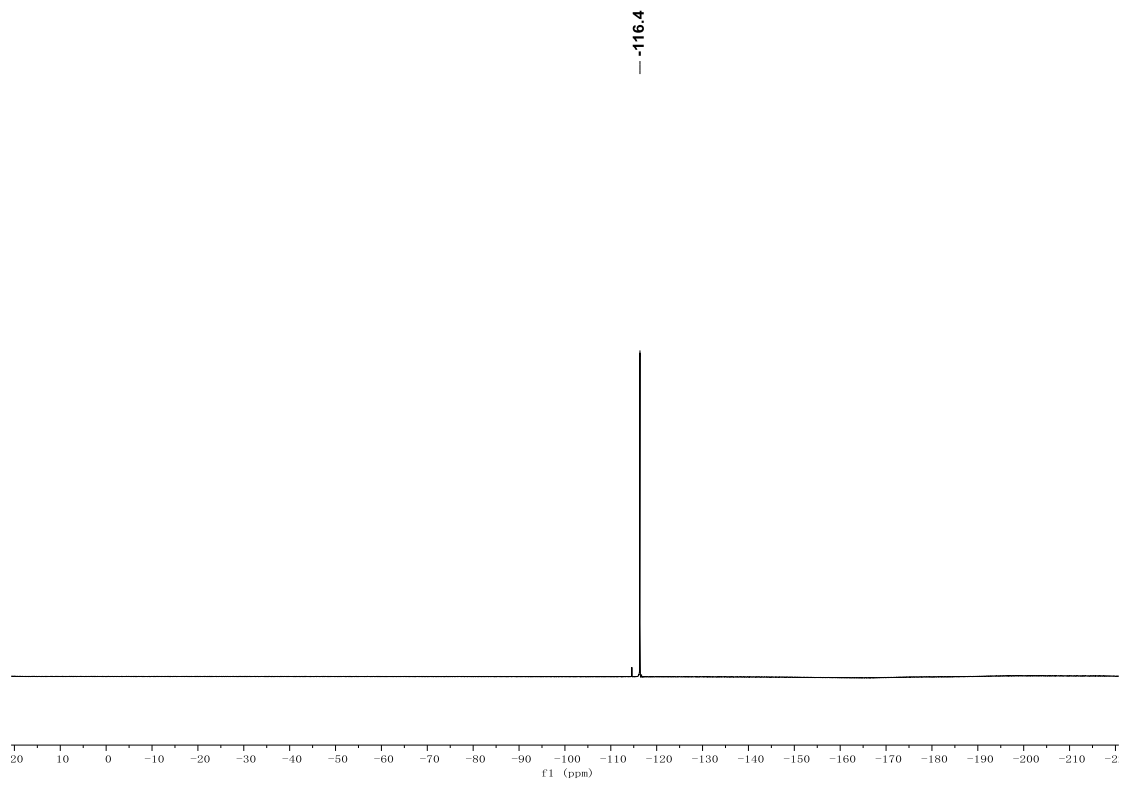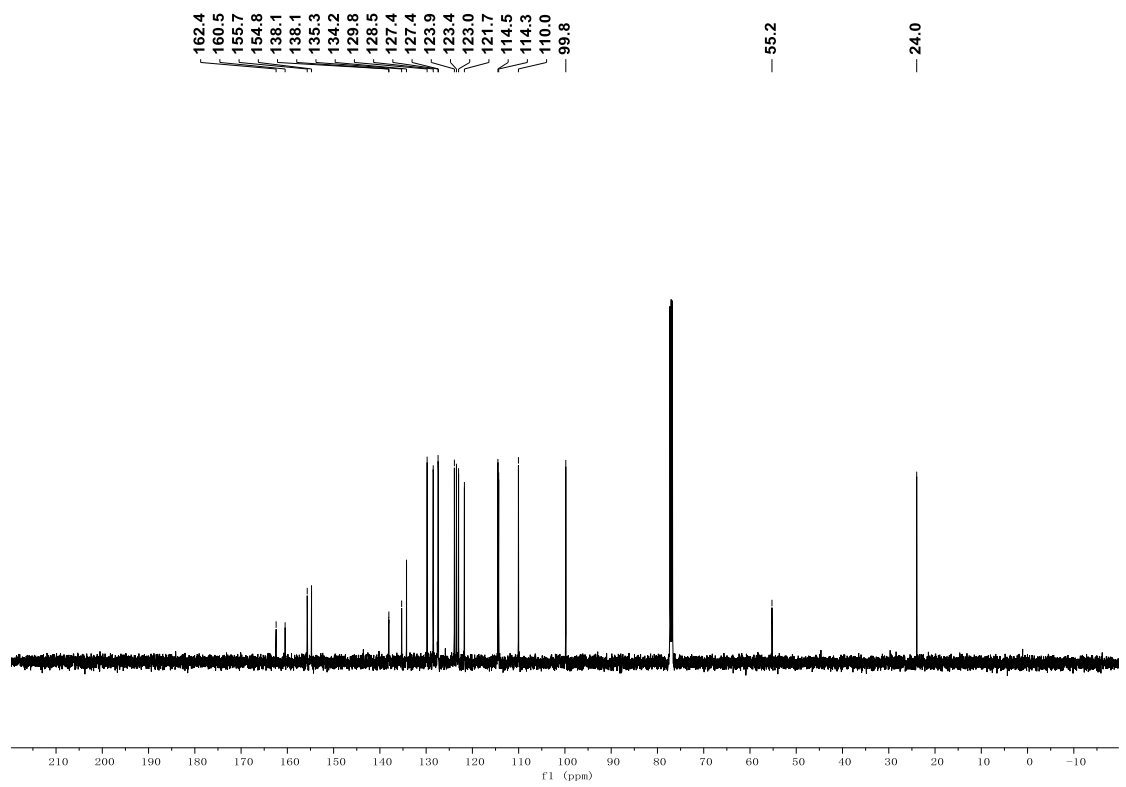

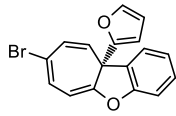

4h

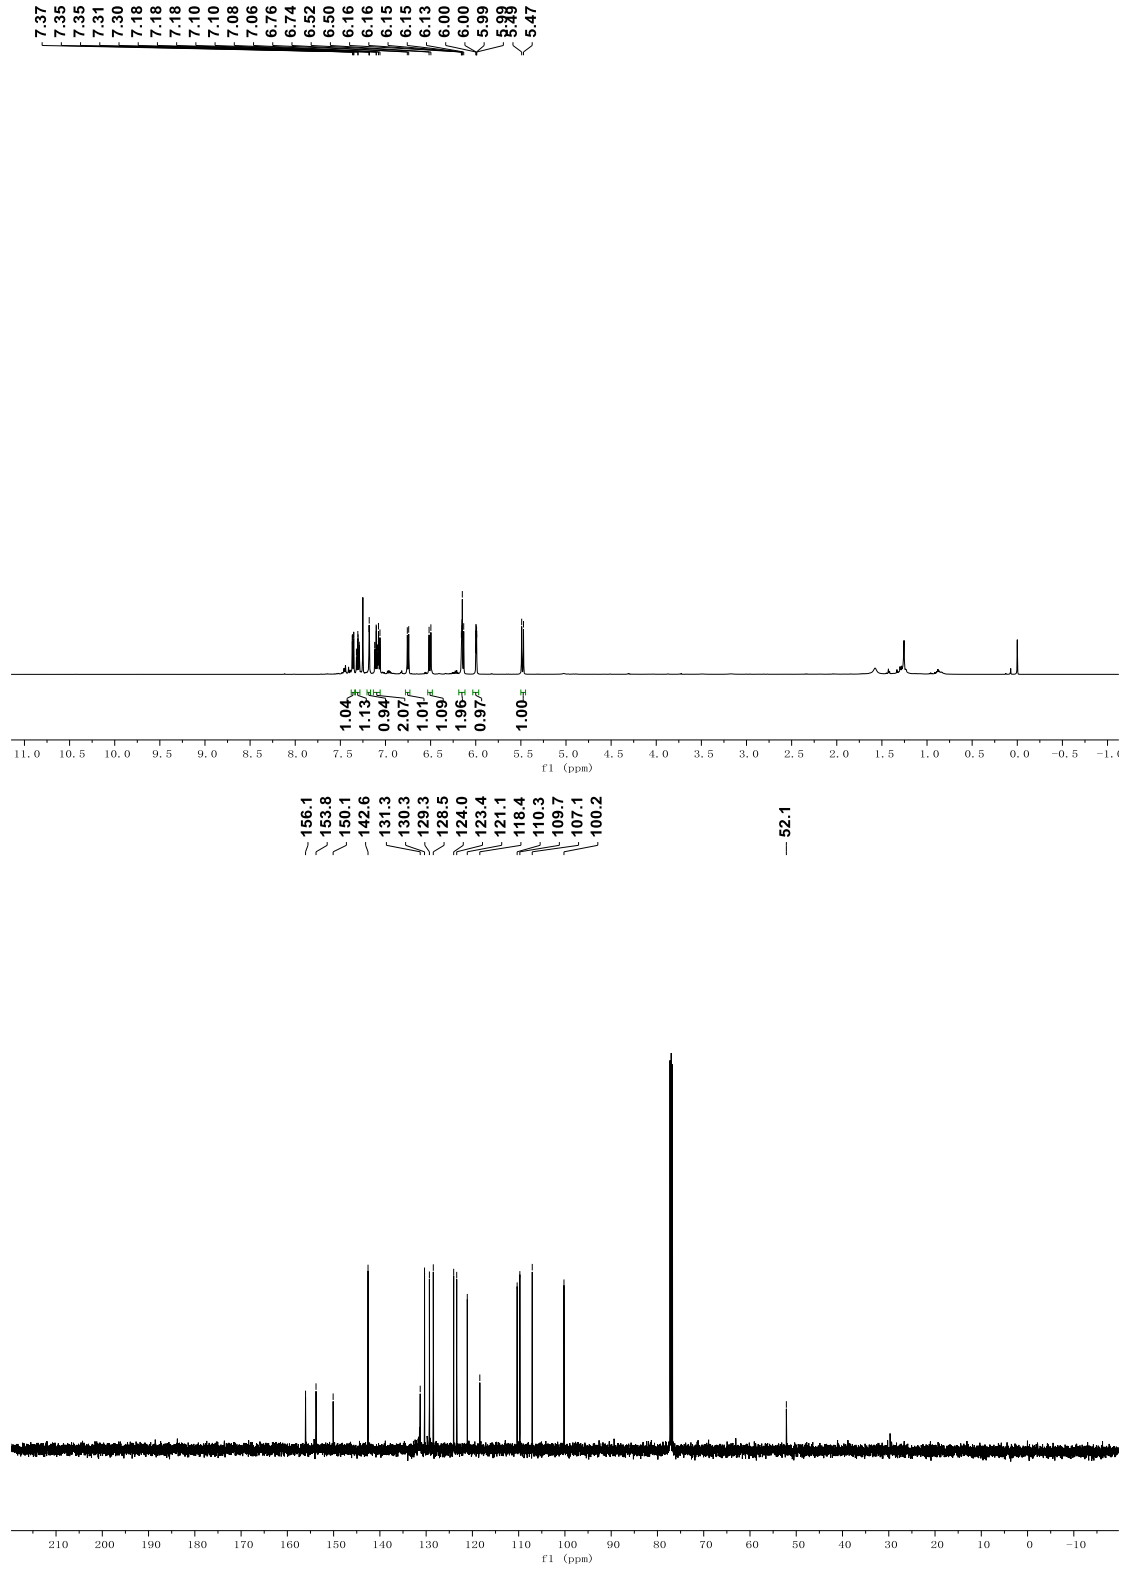

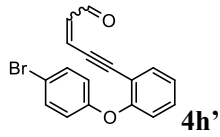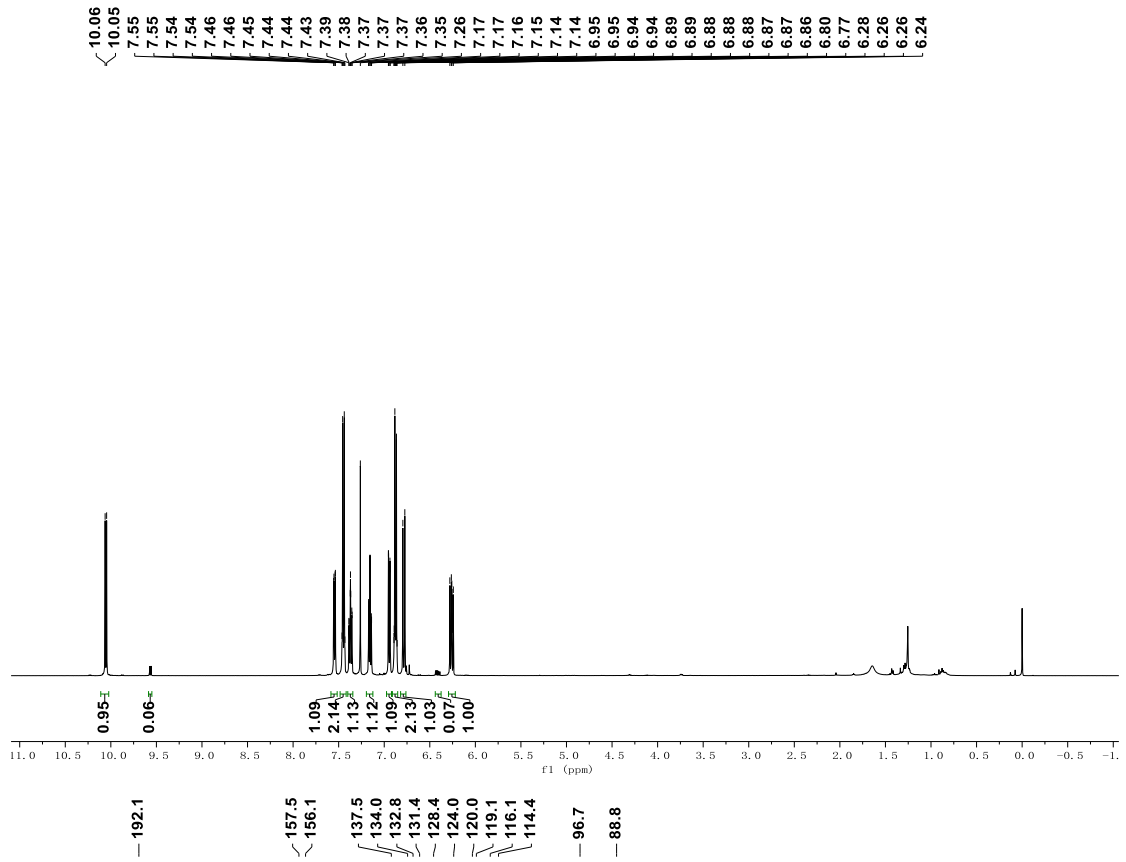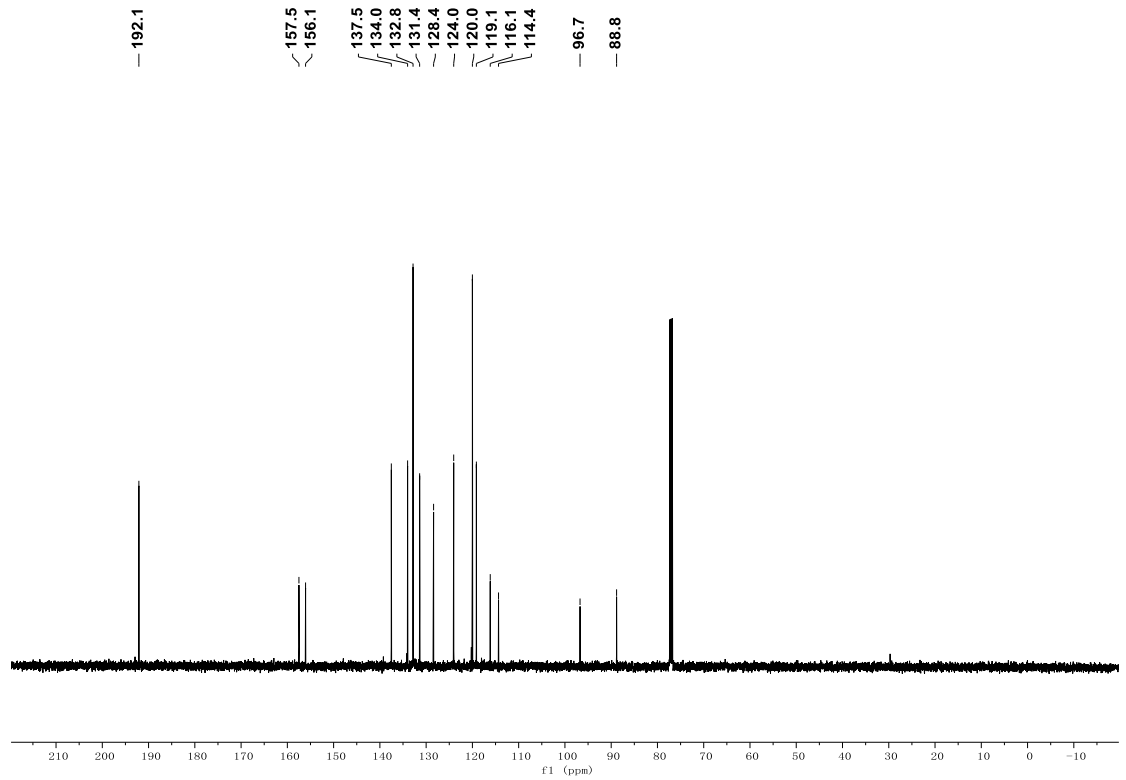

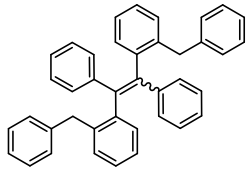

4i

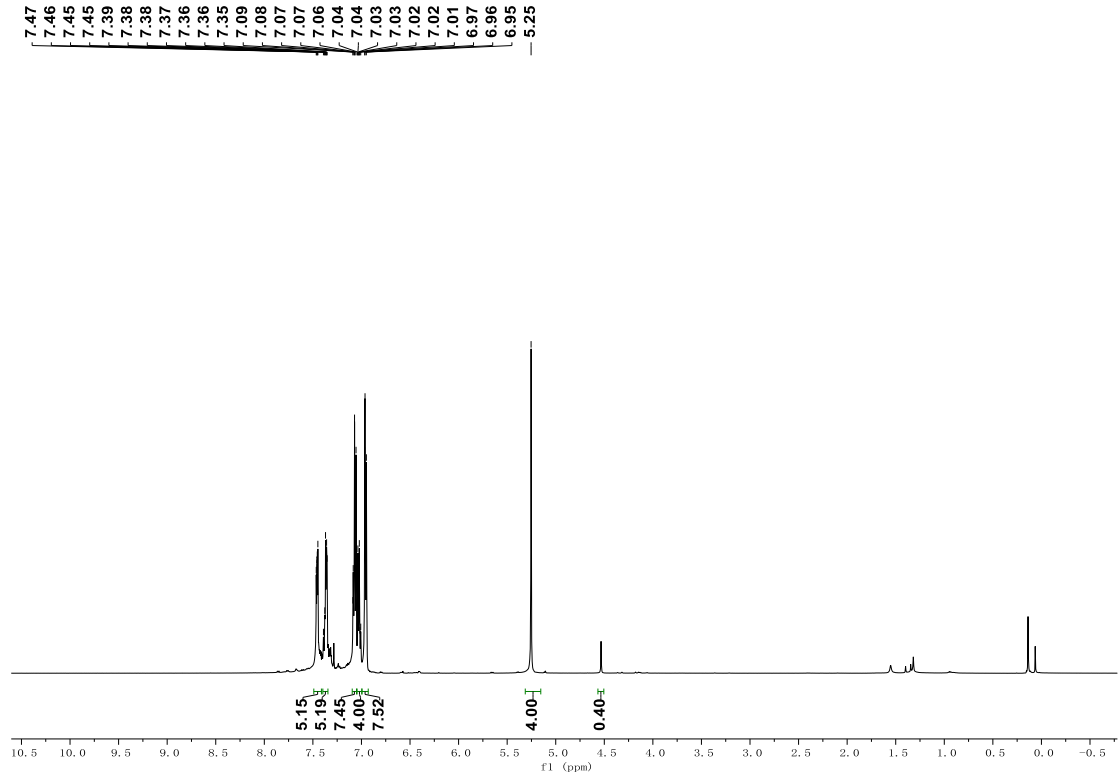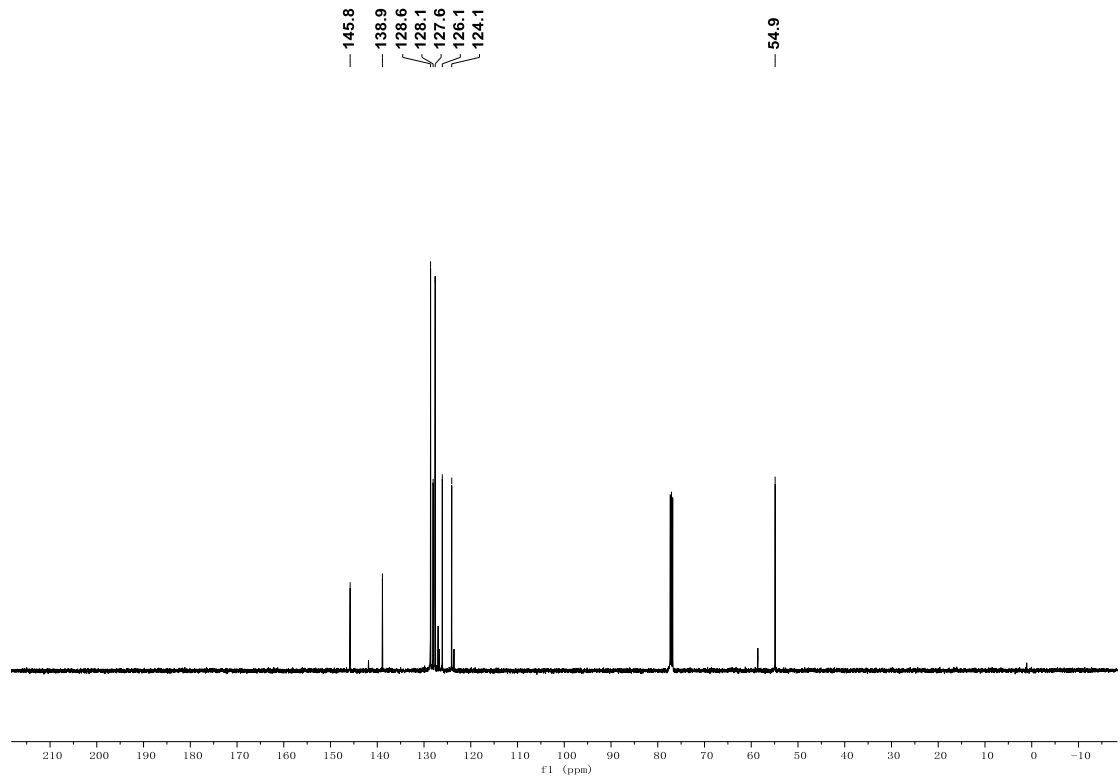

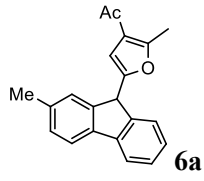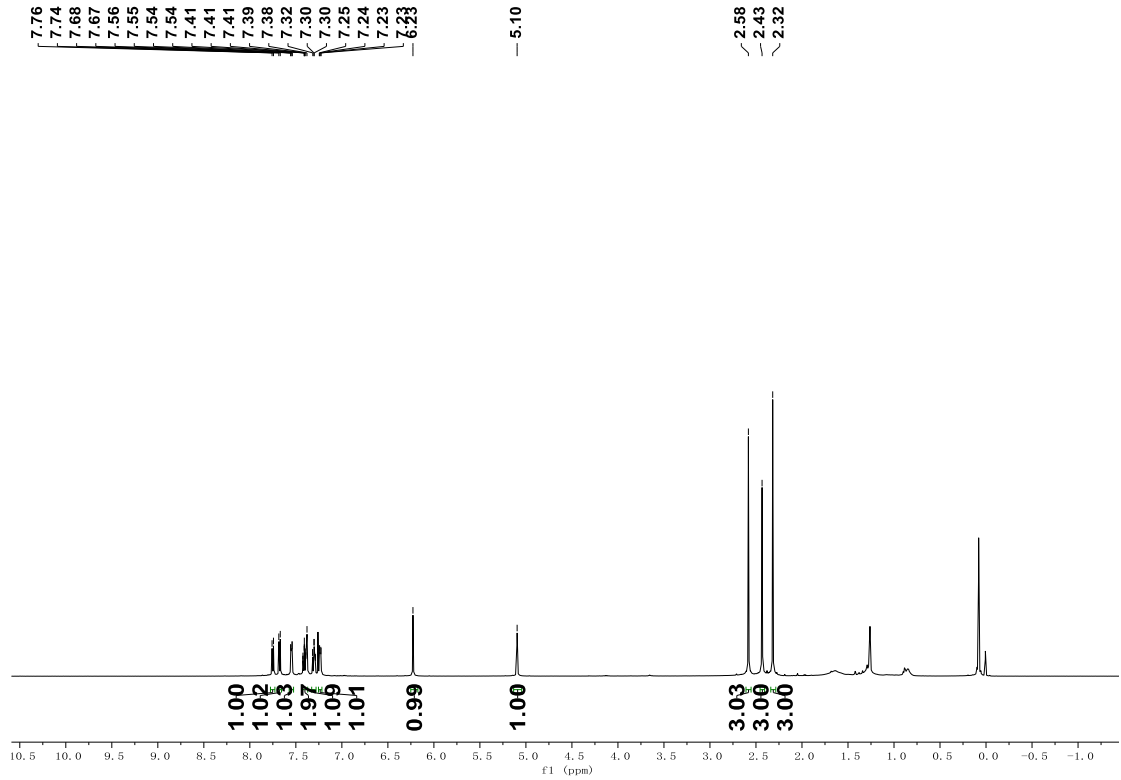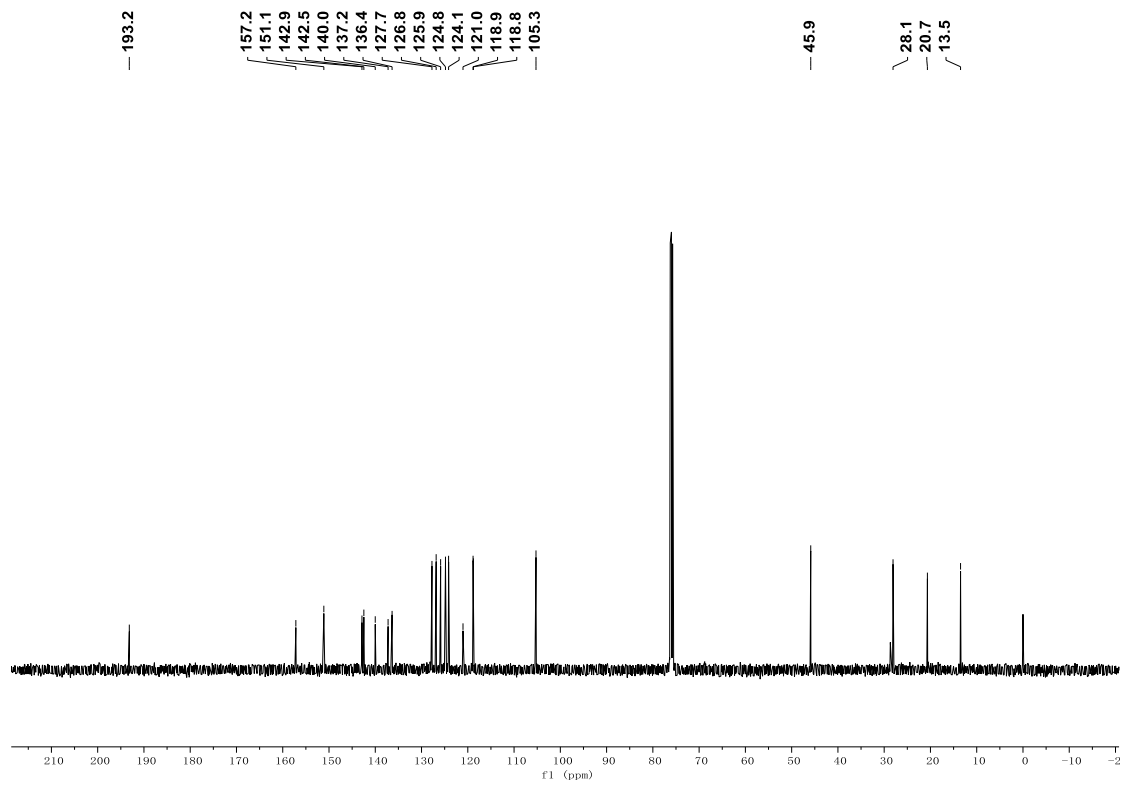

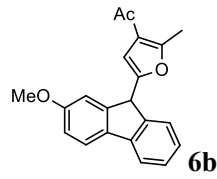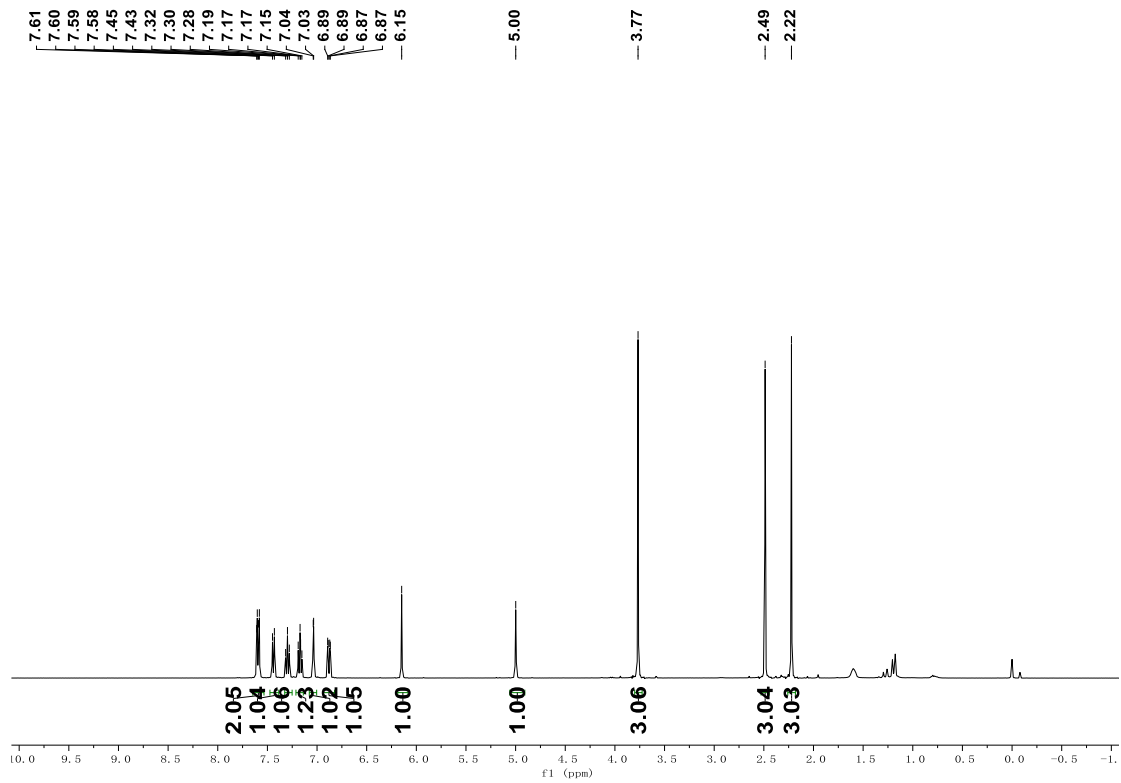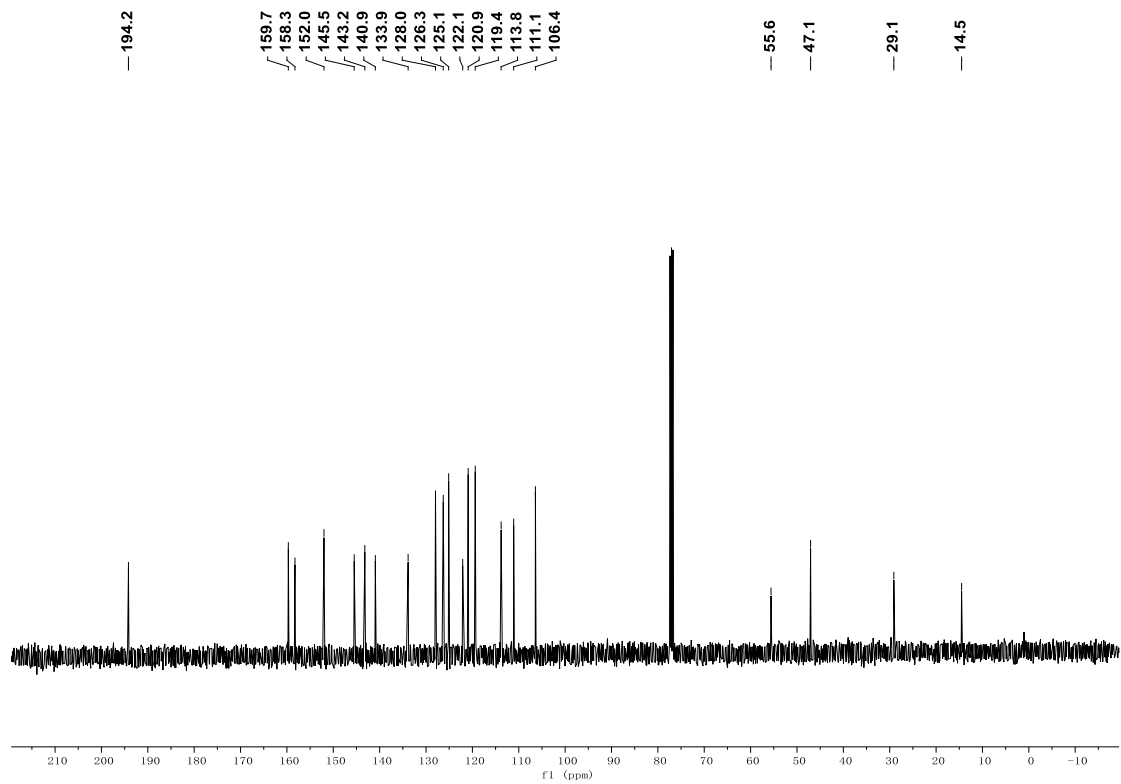

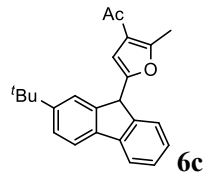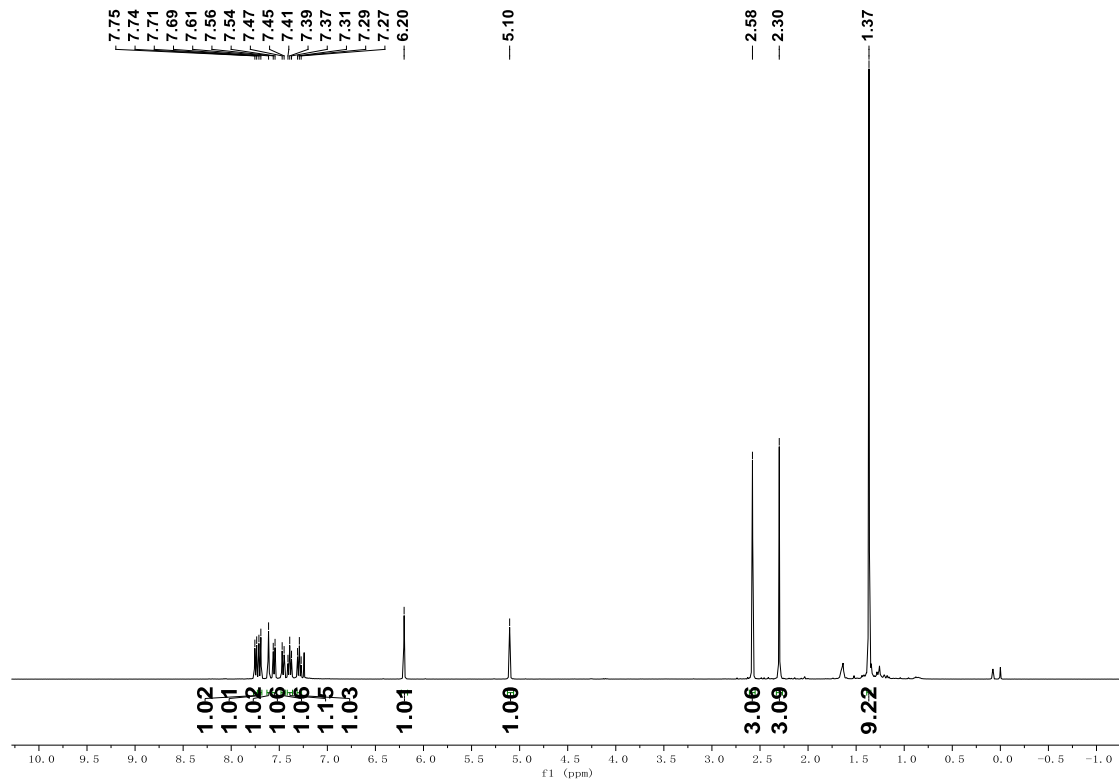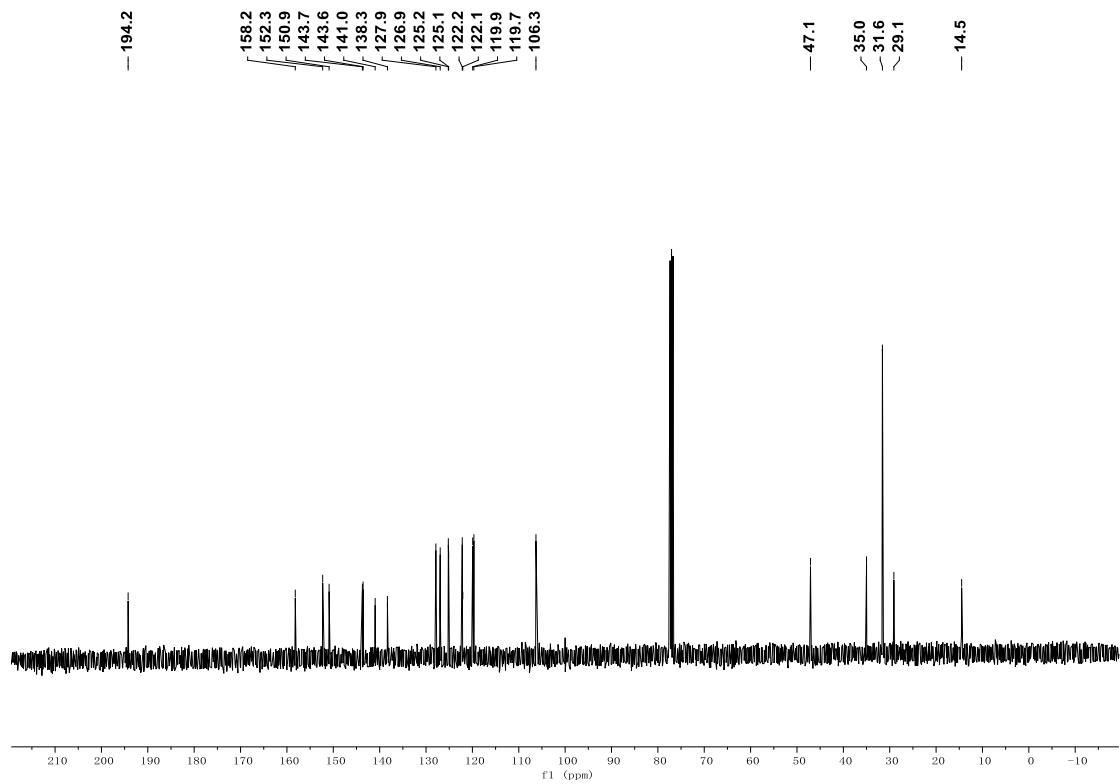



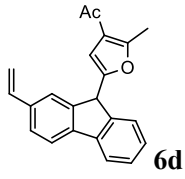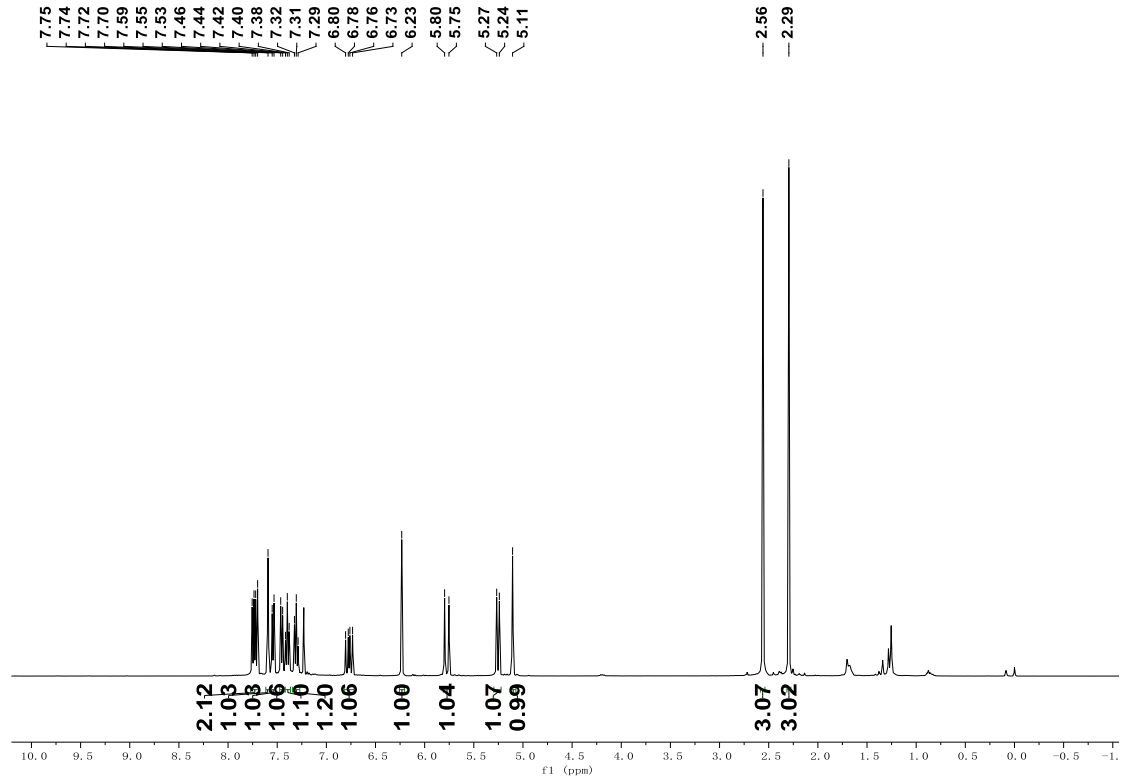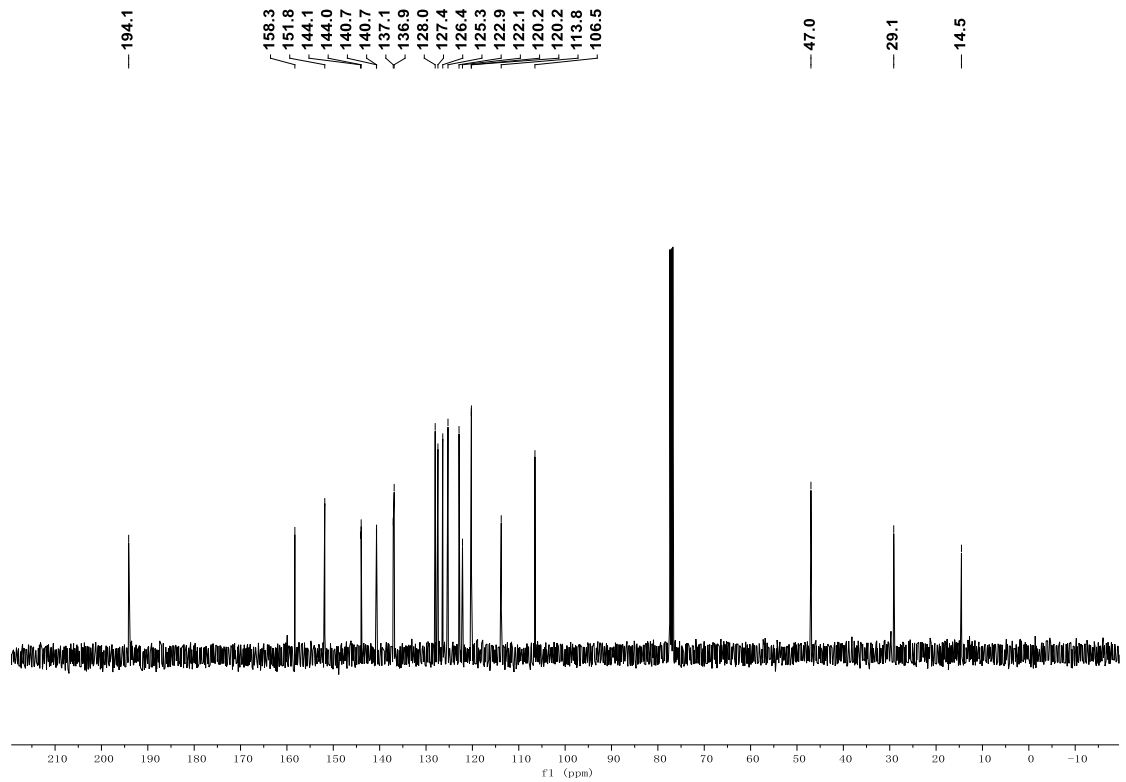

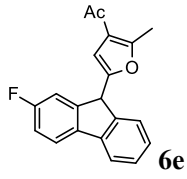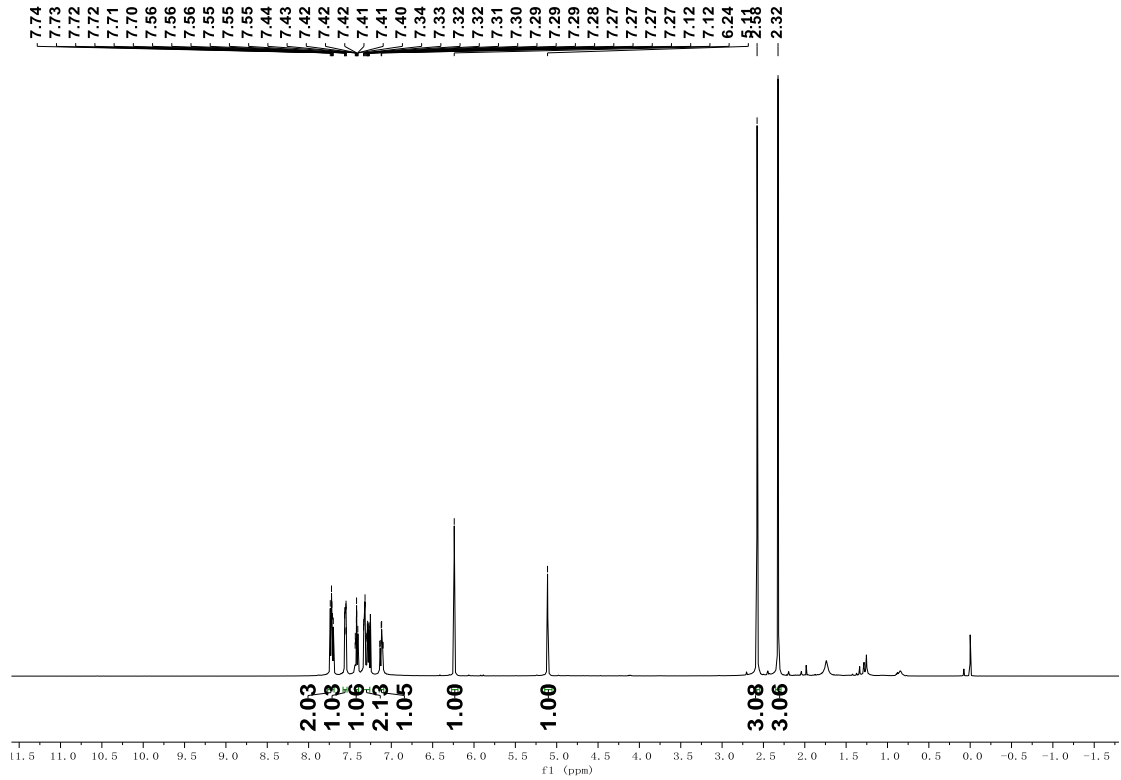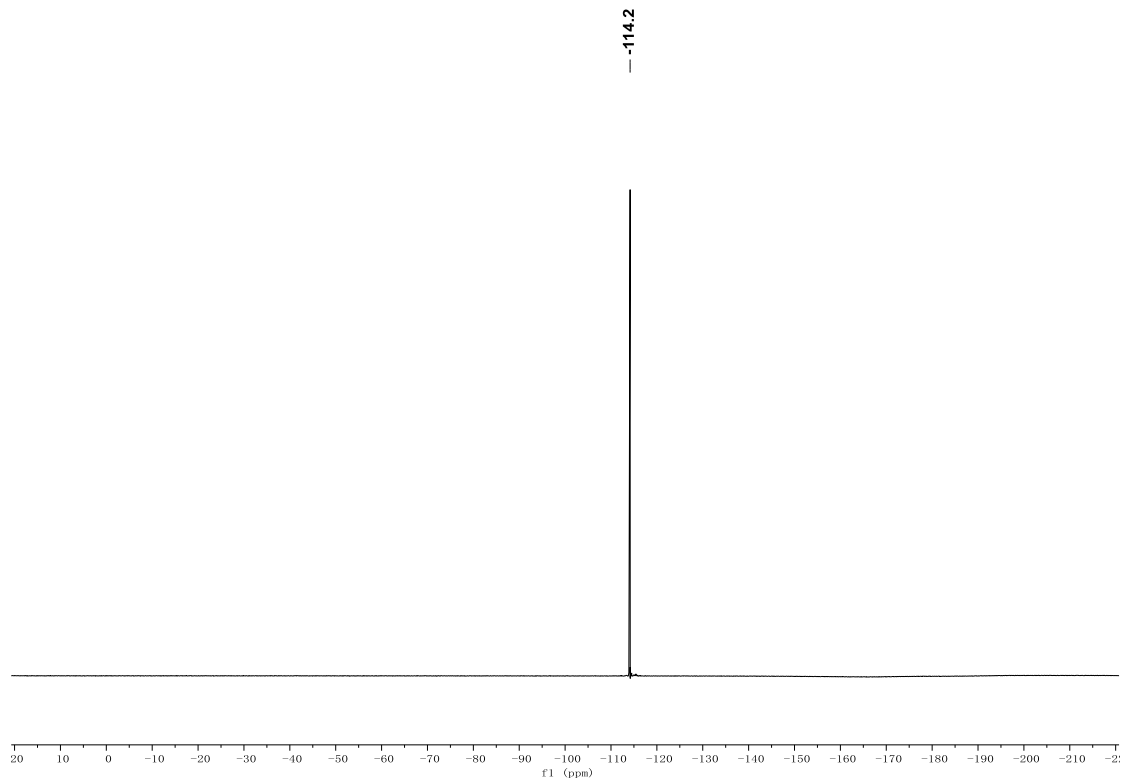

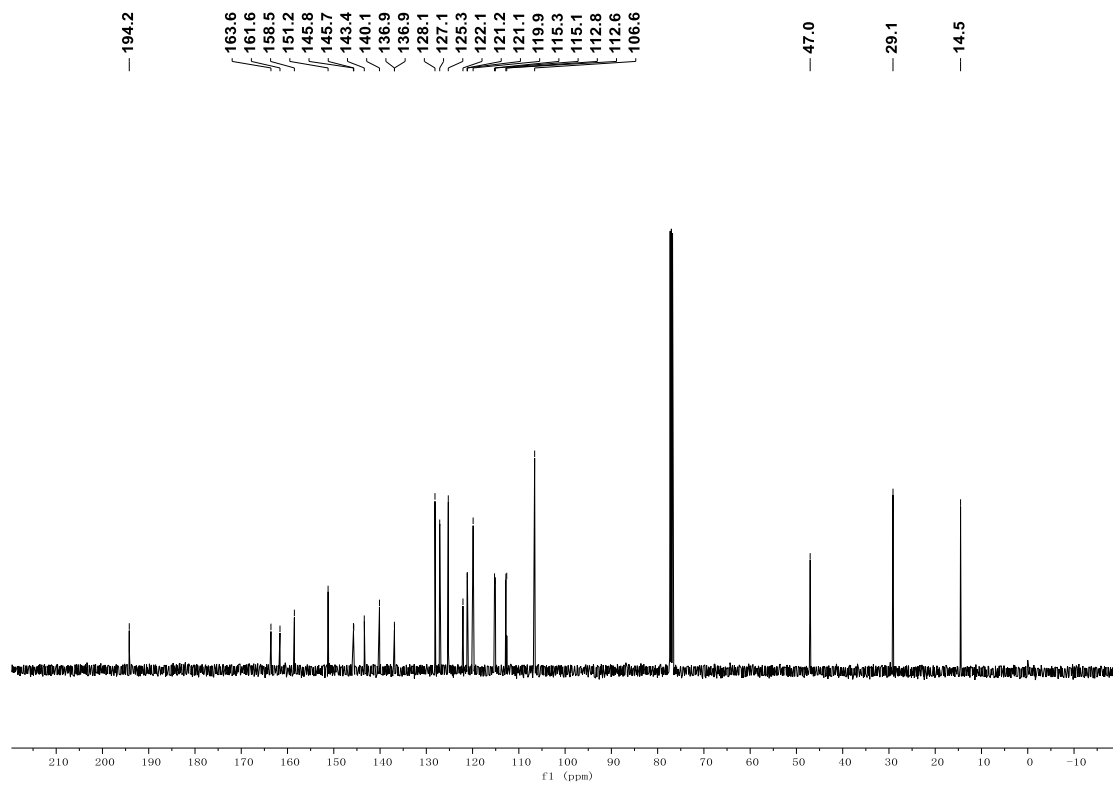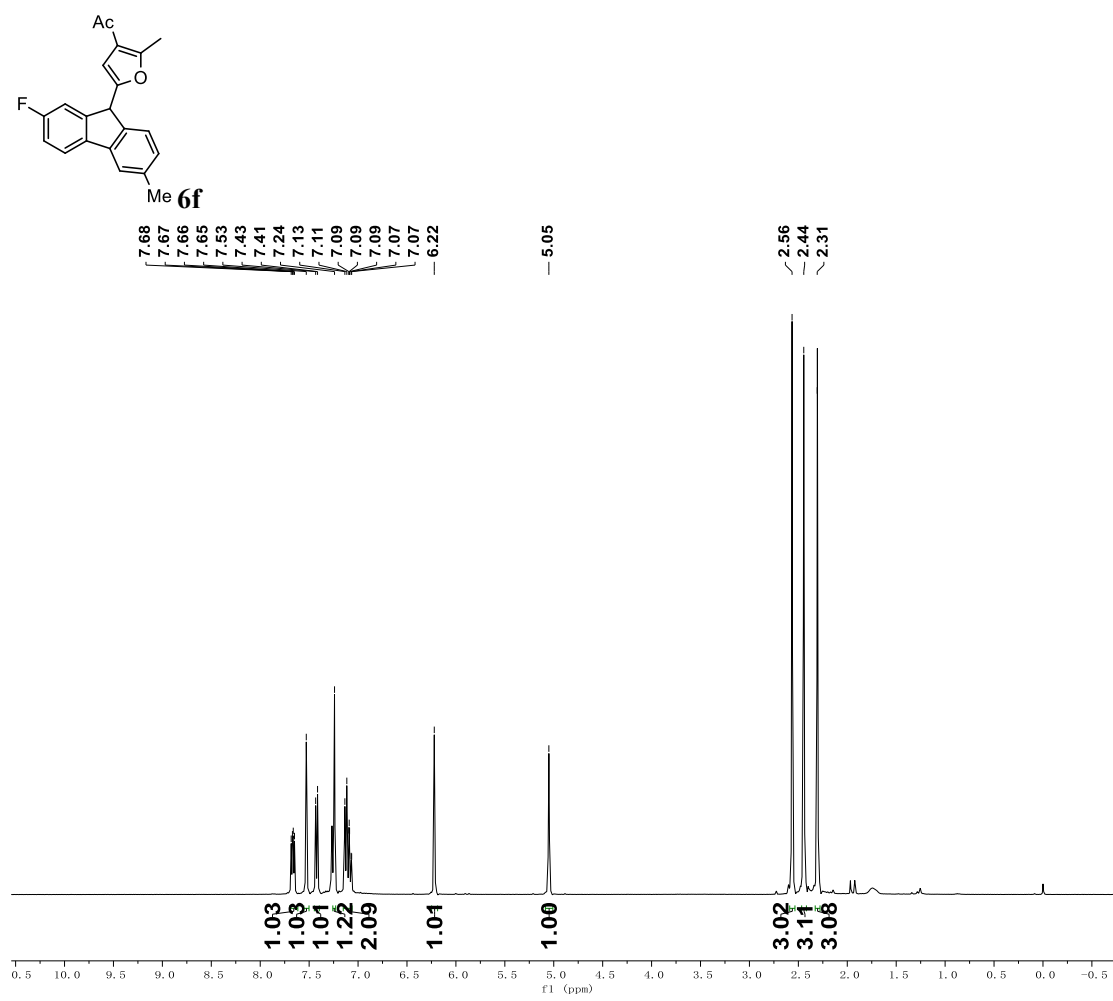

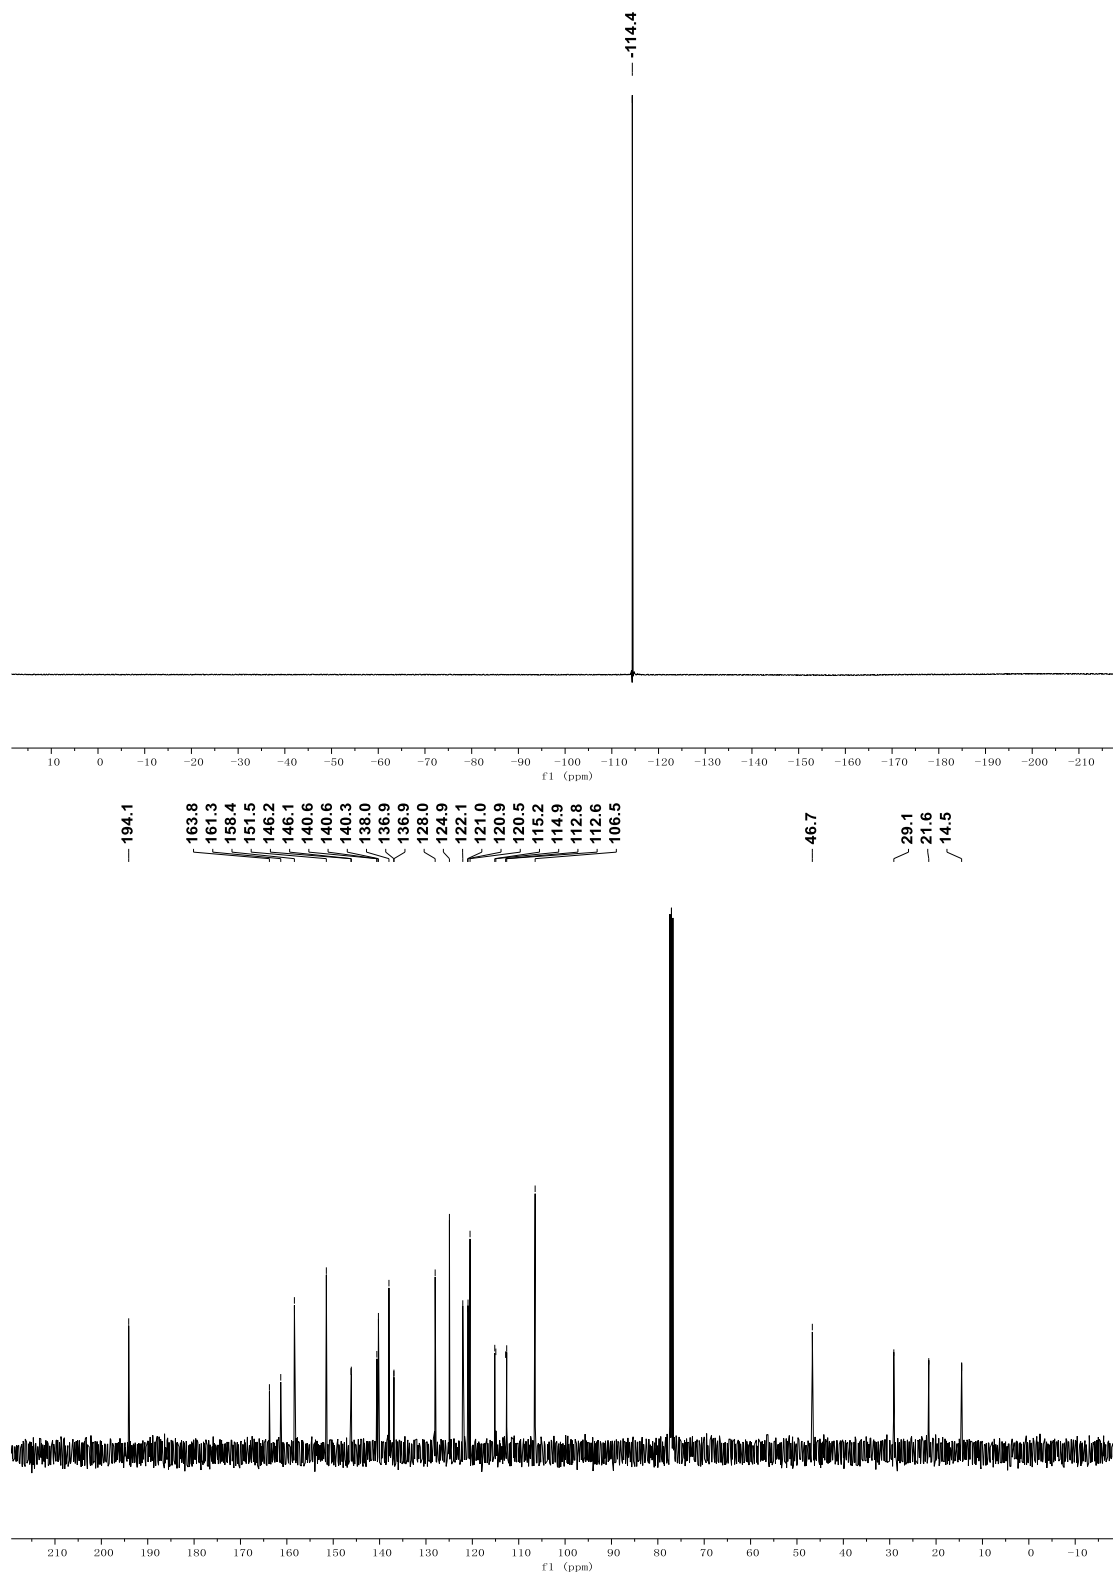

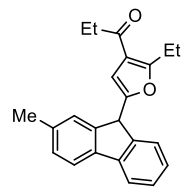

**6g**

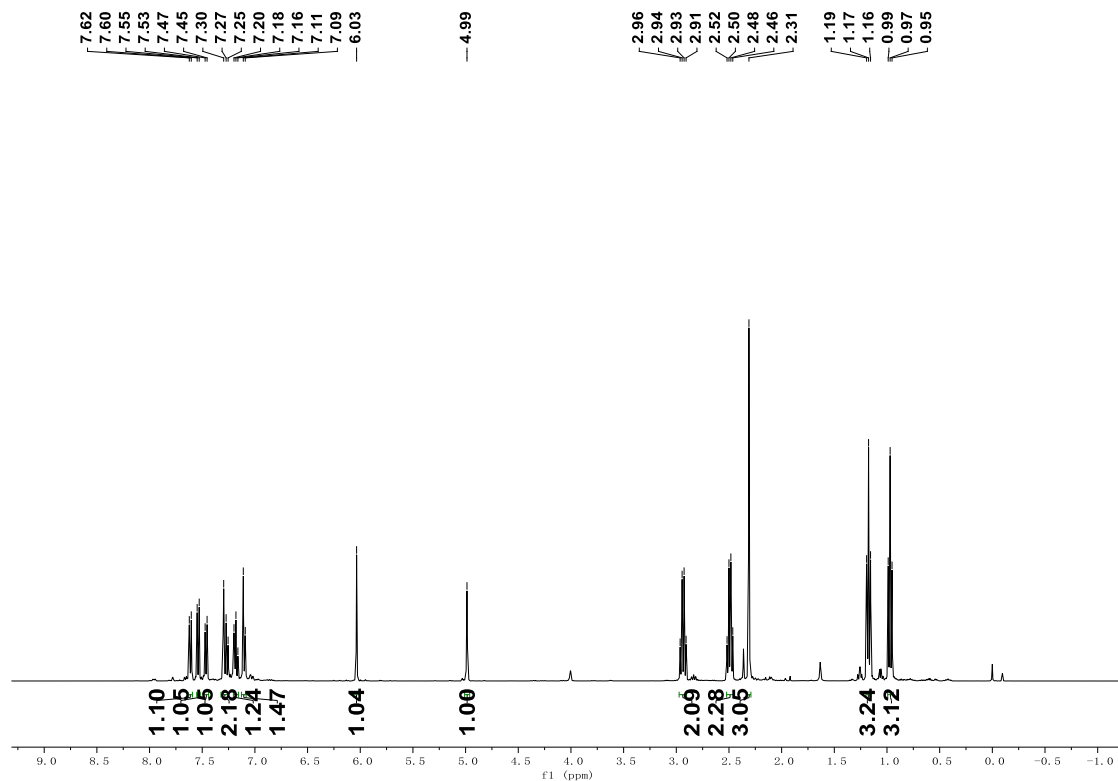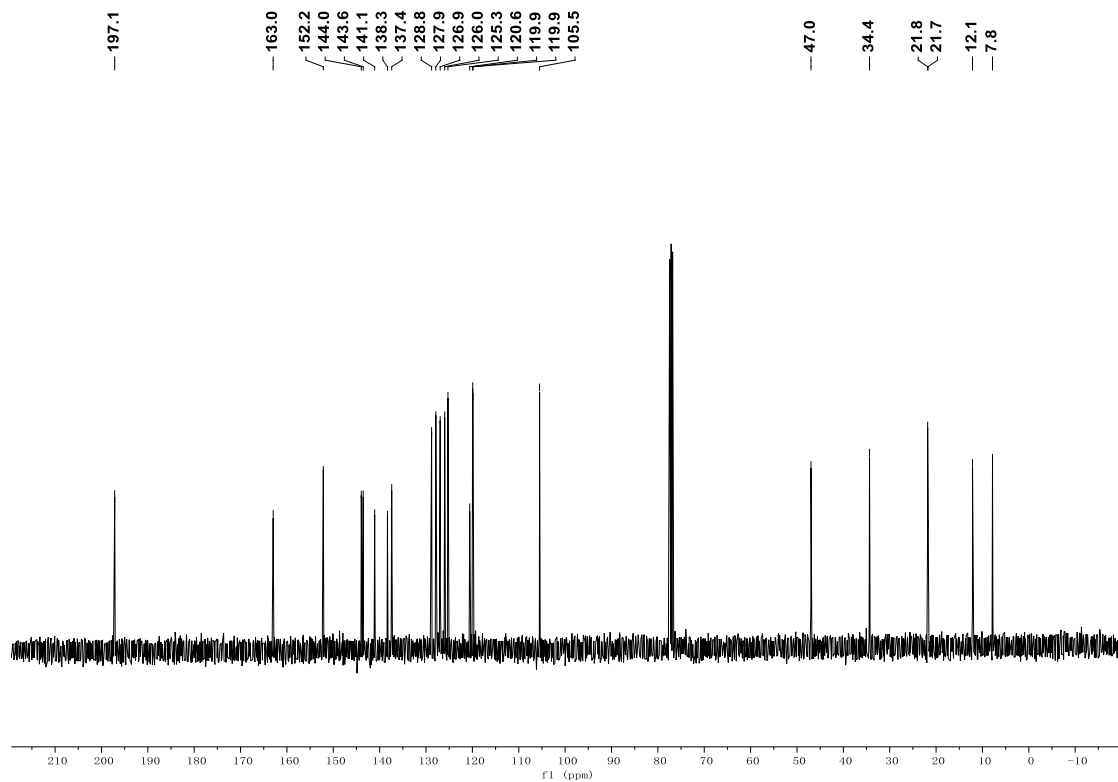

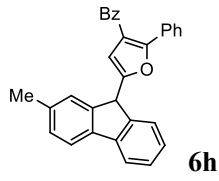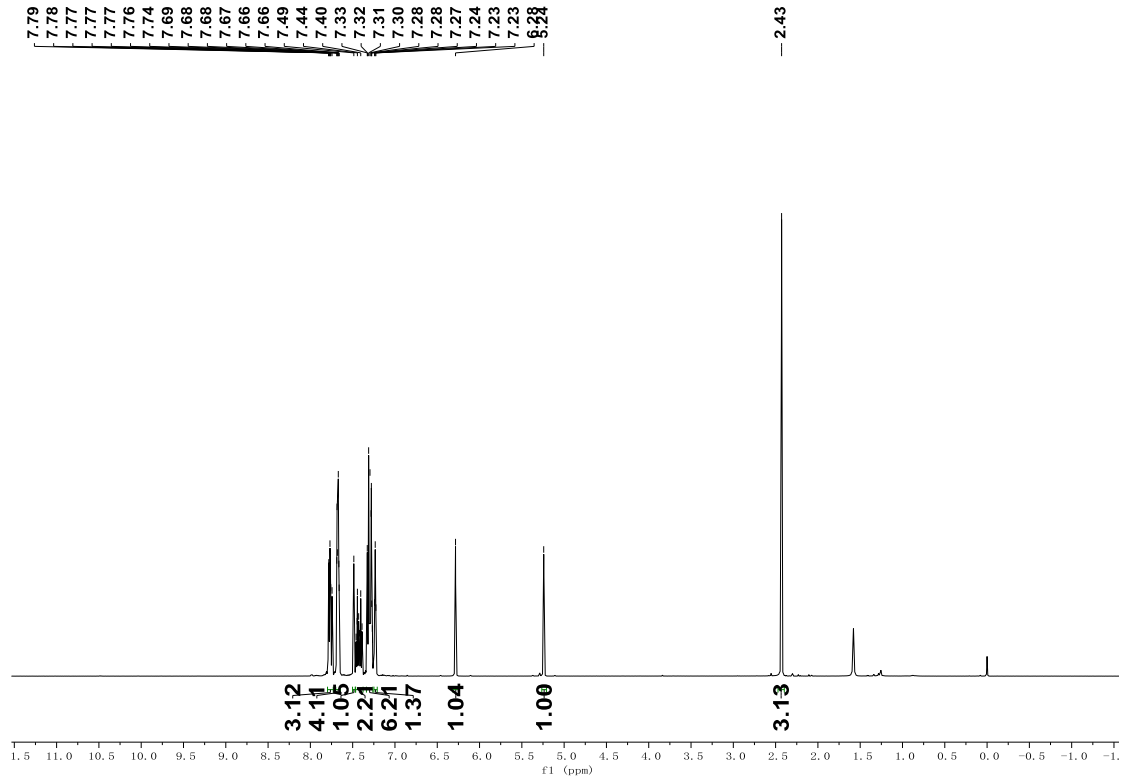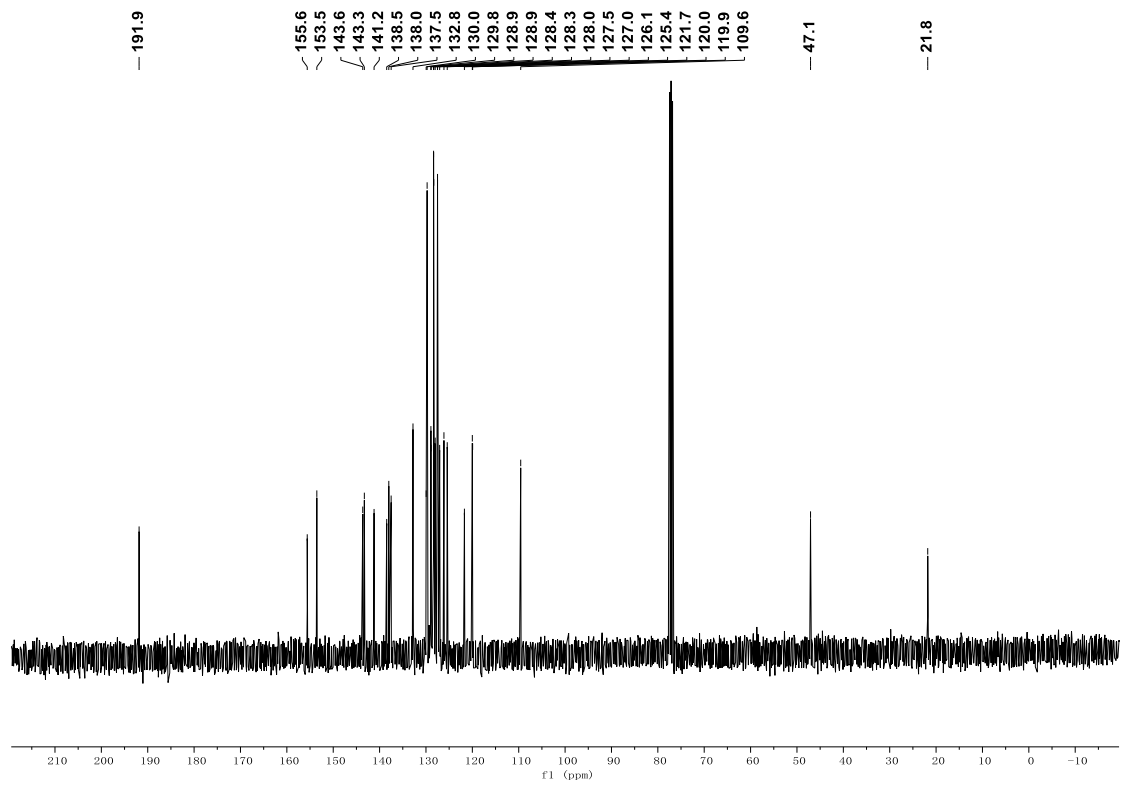

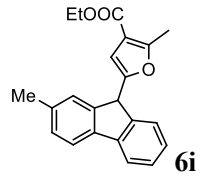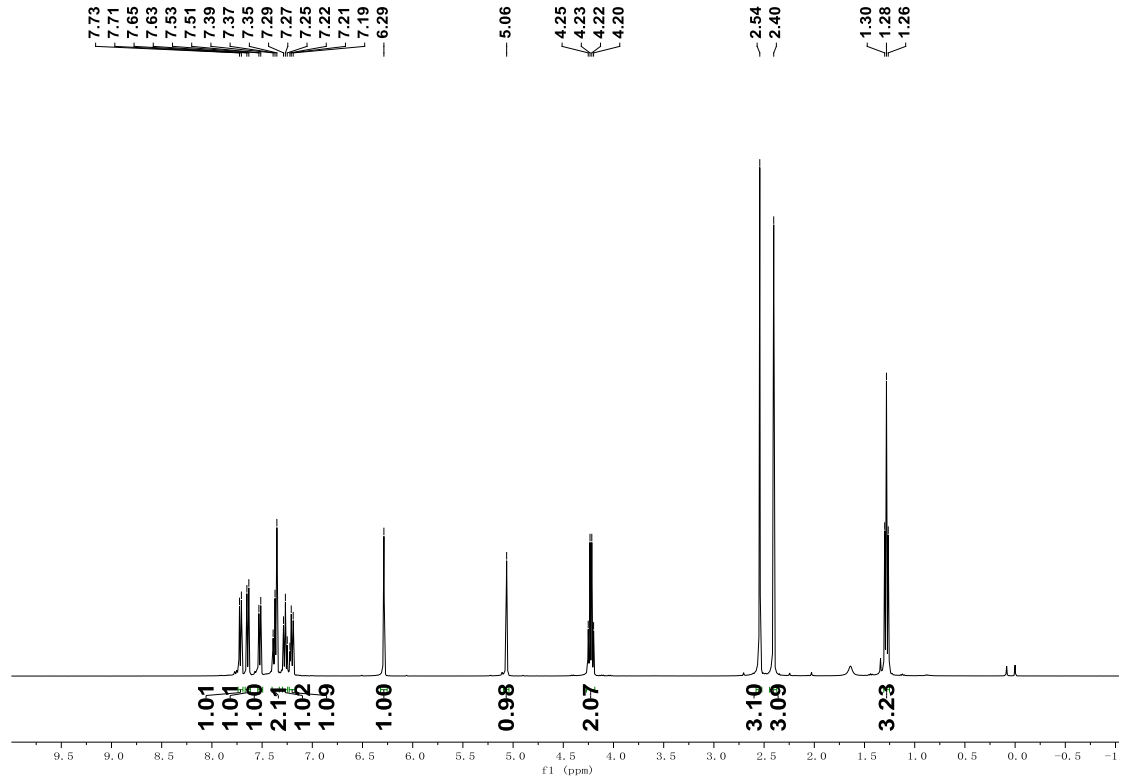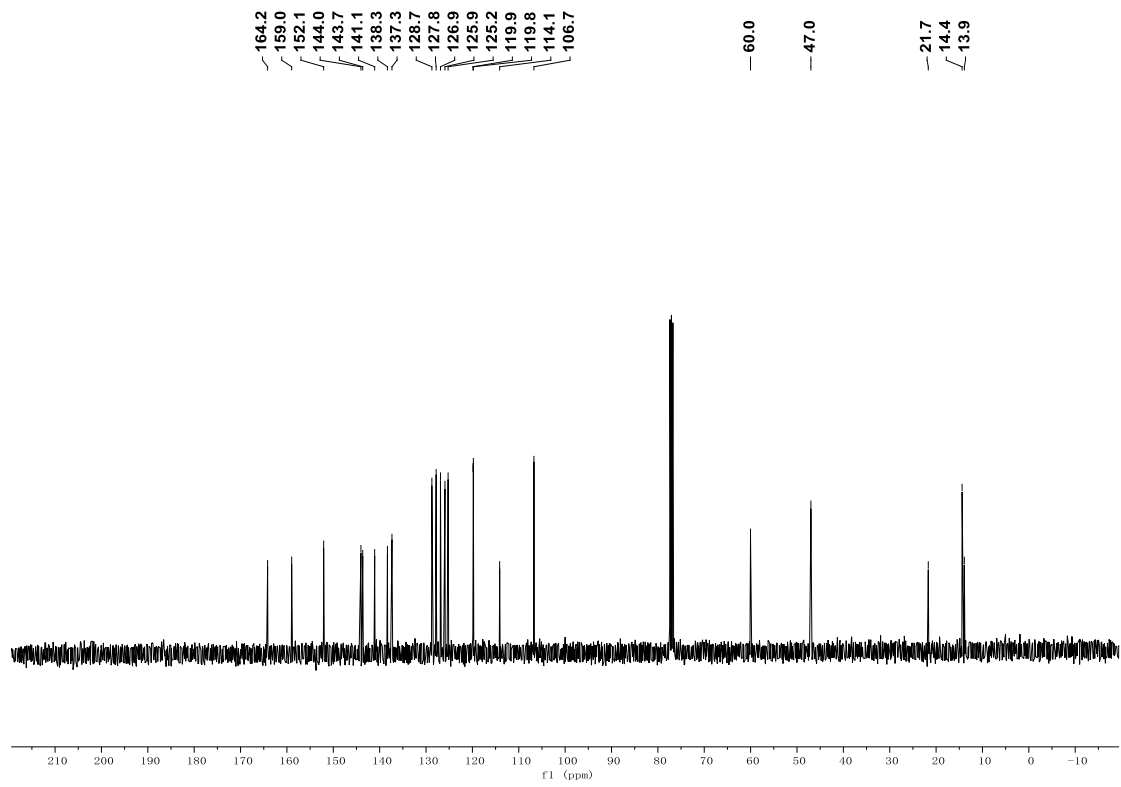

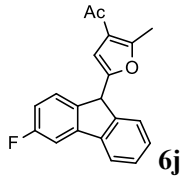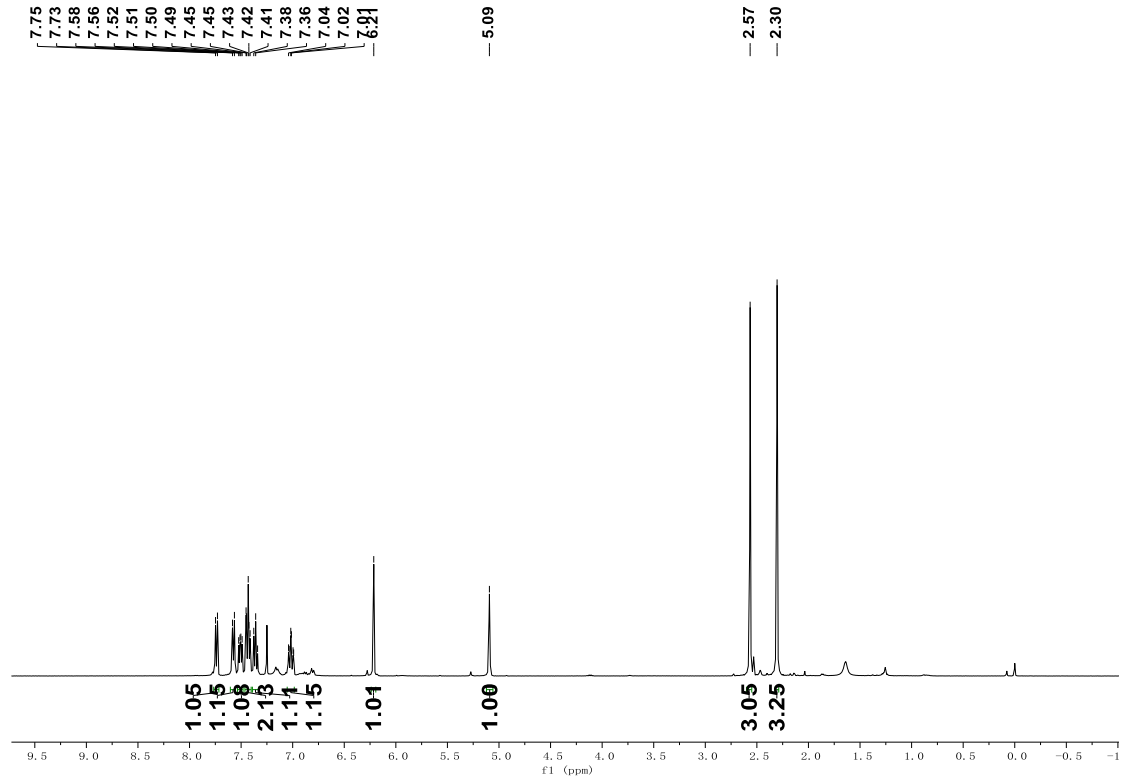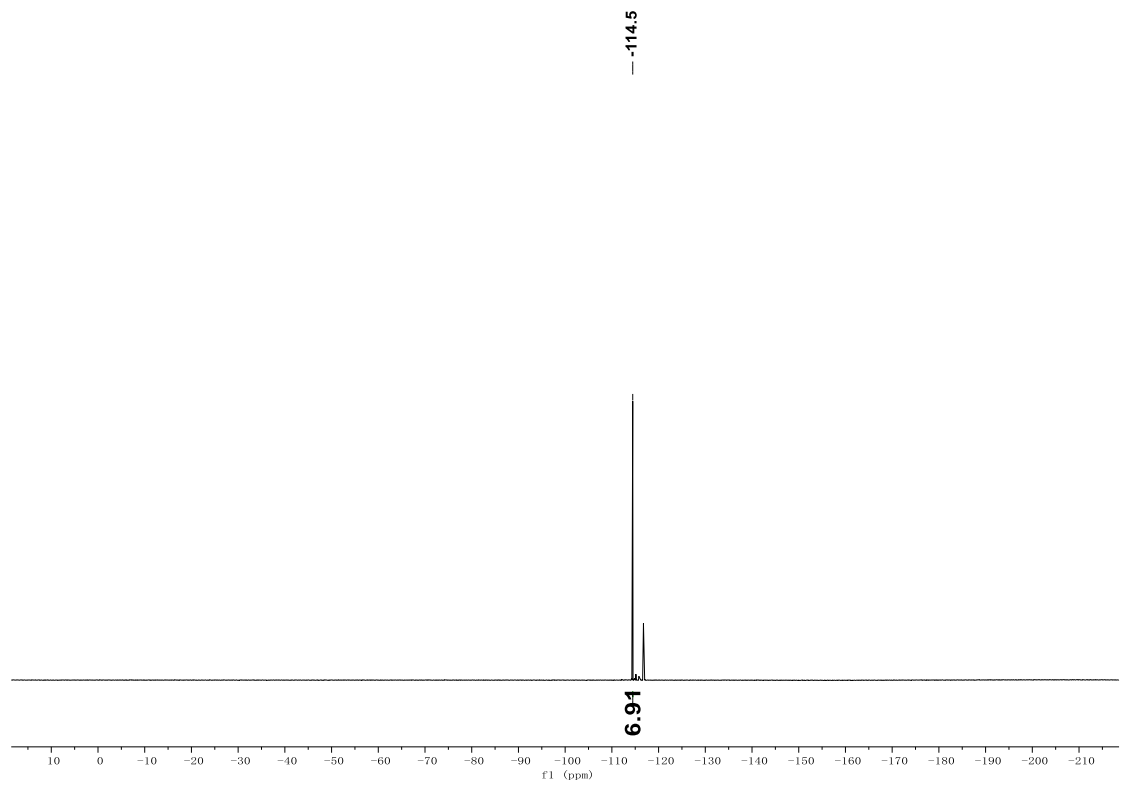



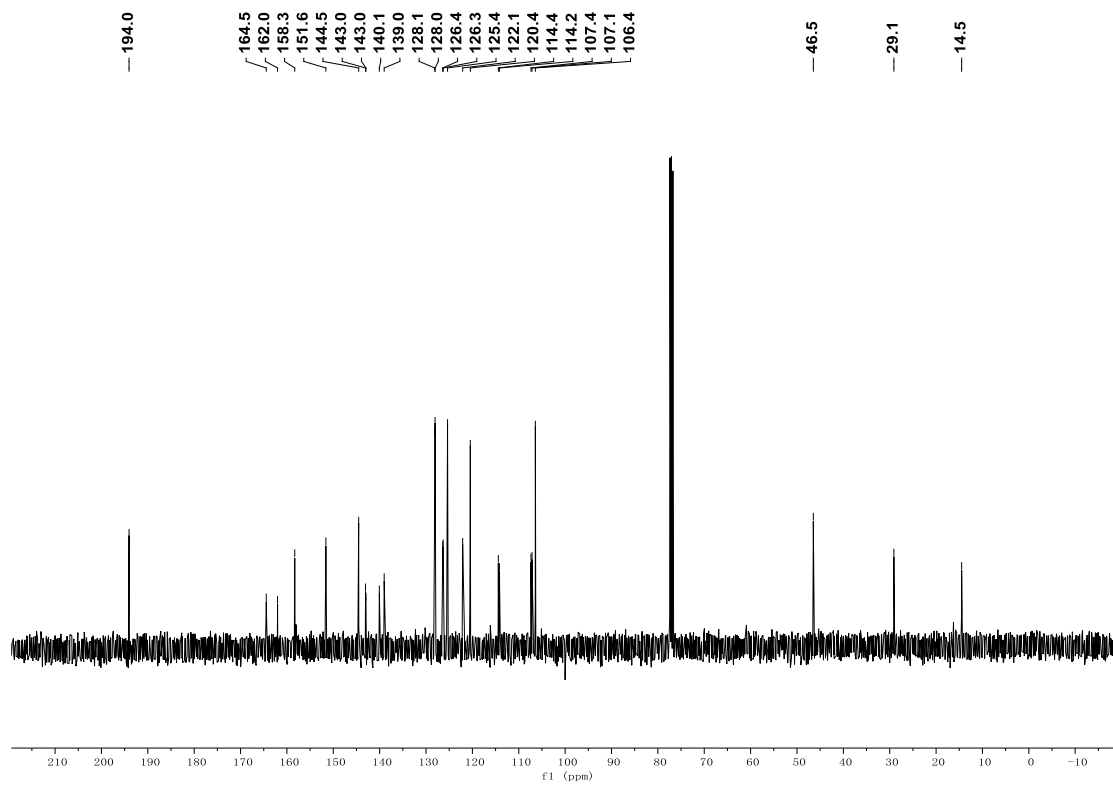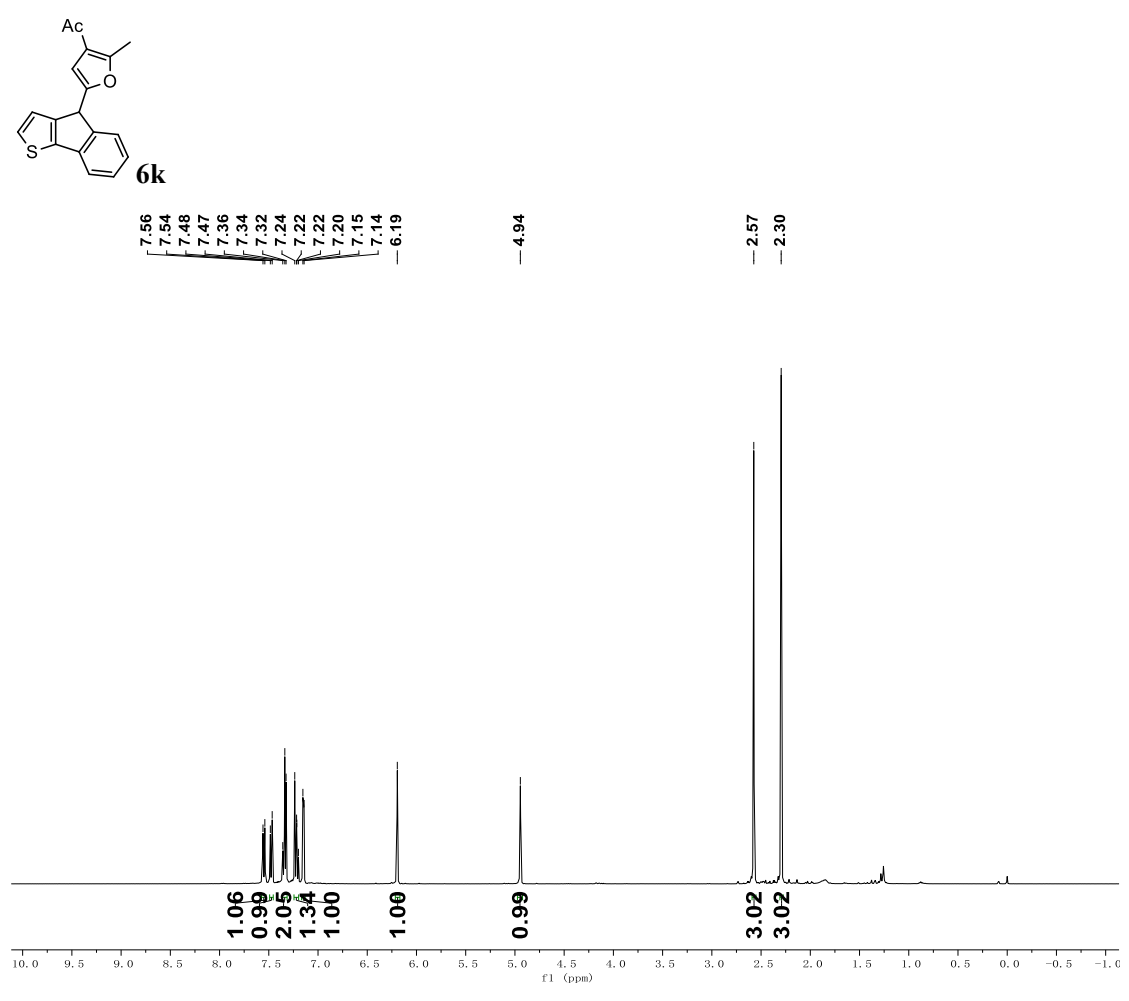

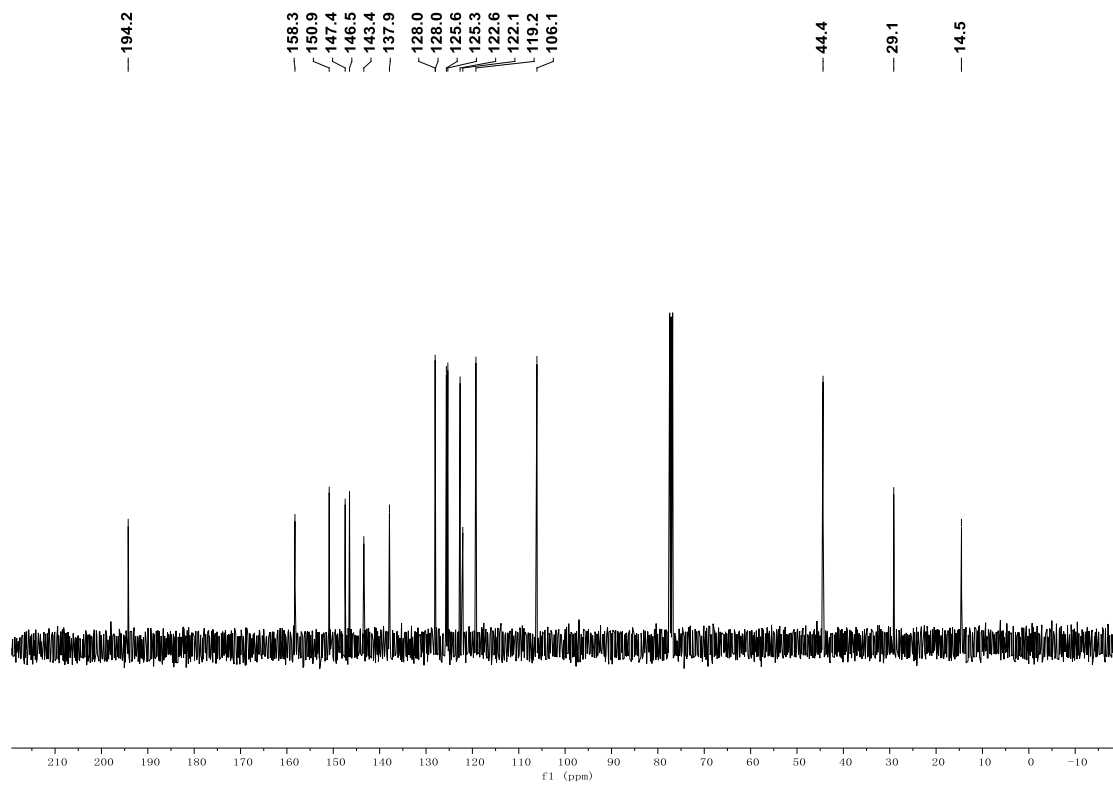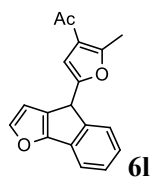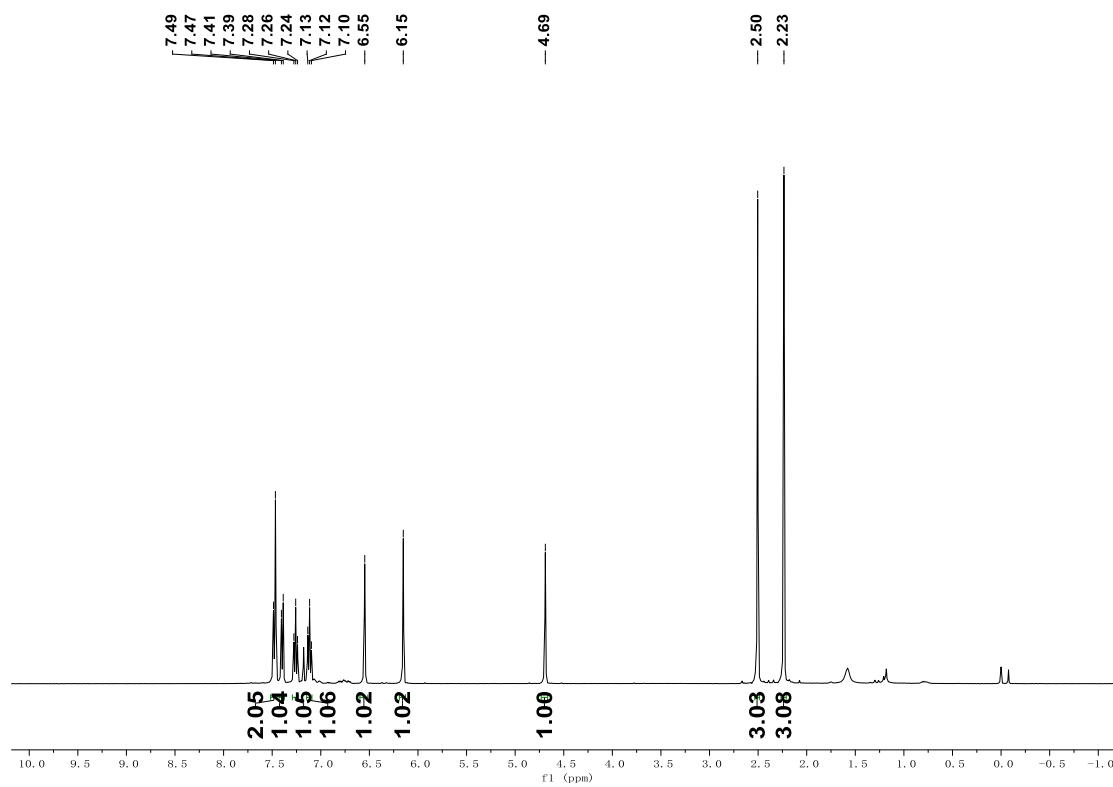

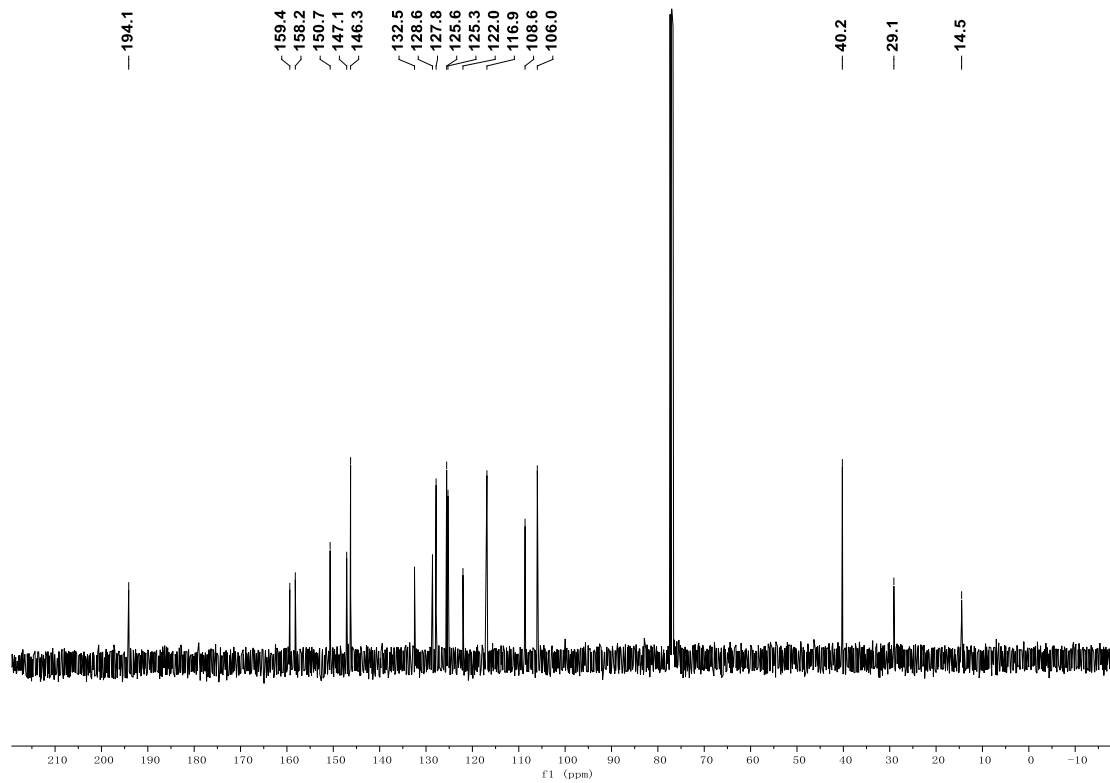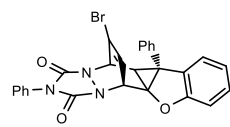

**10a**

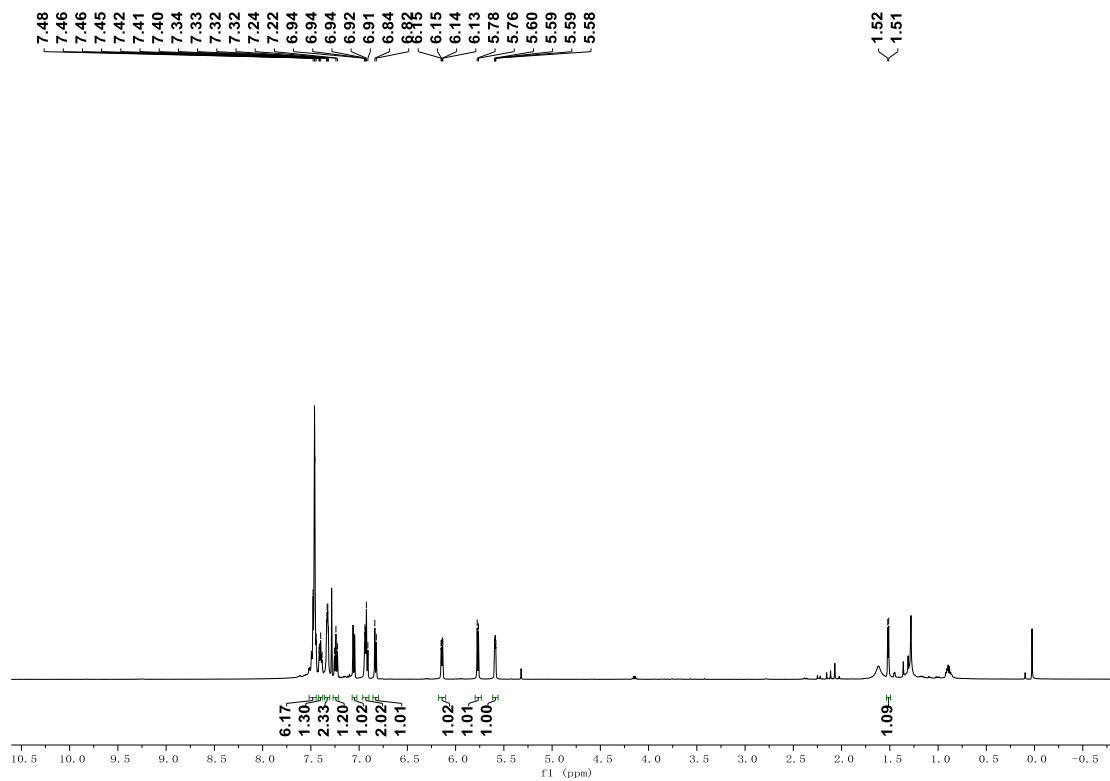

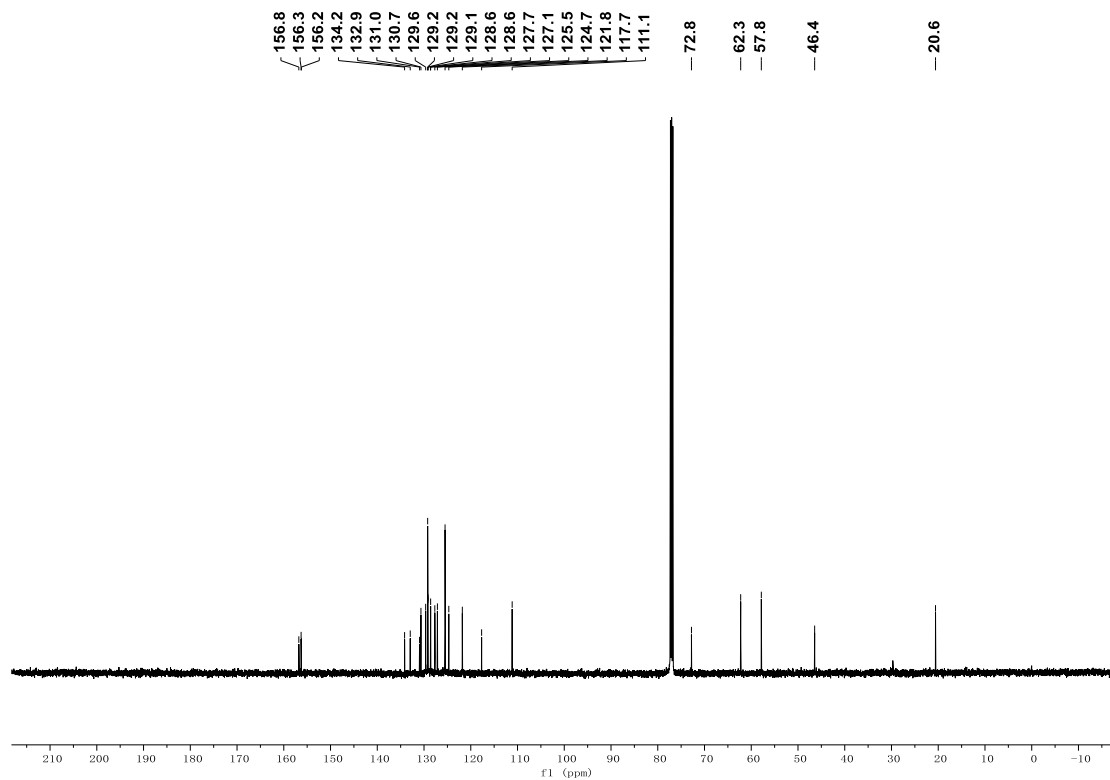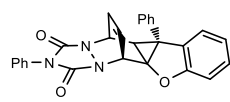

**10b**

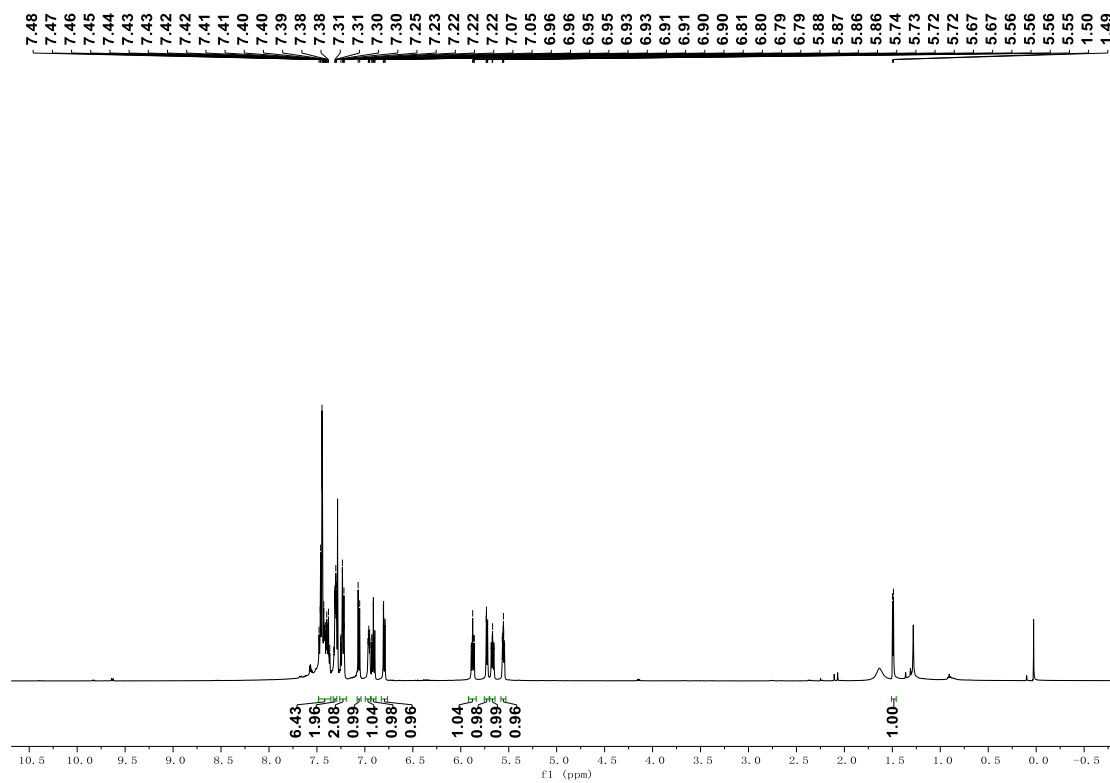

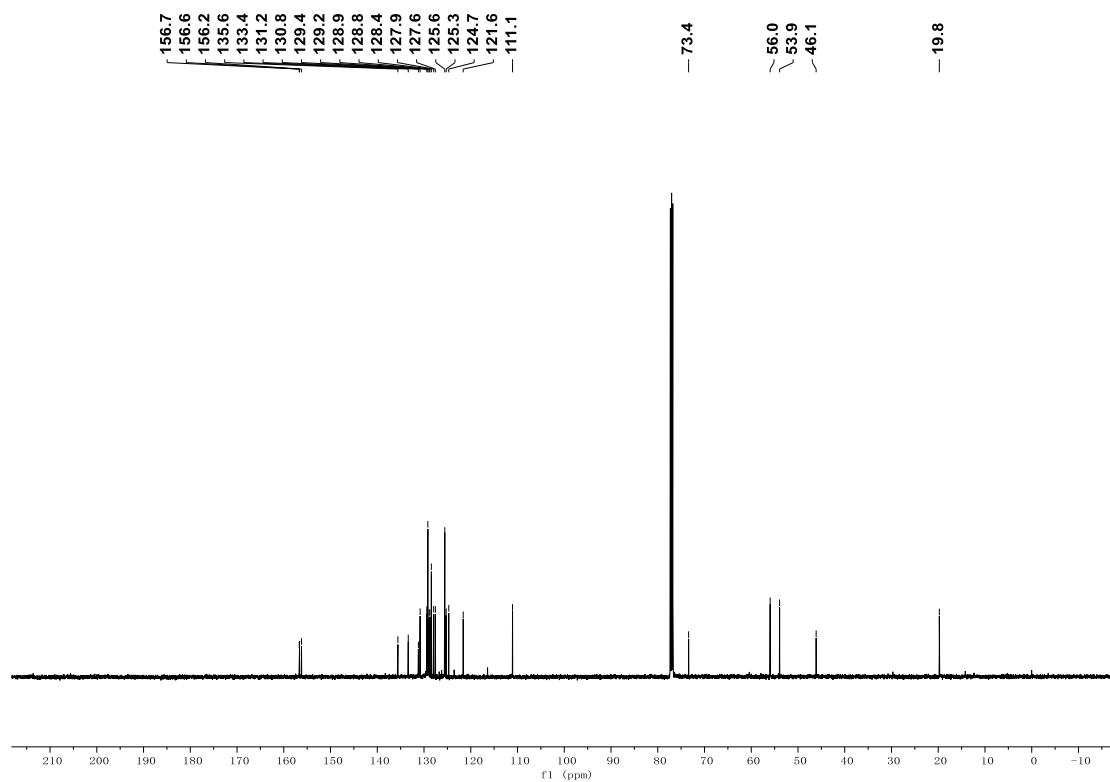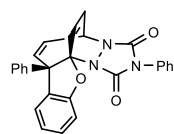

11a

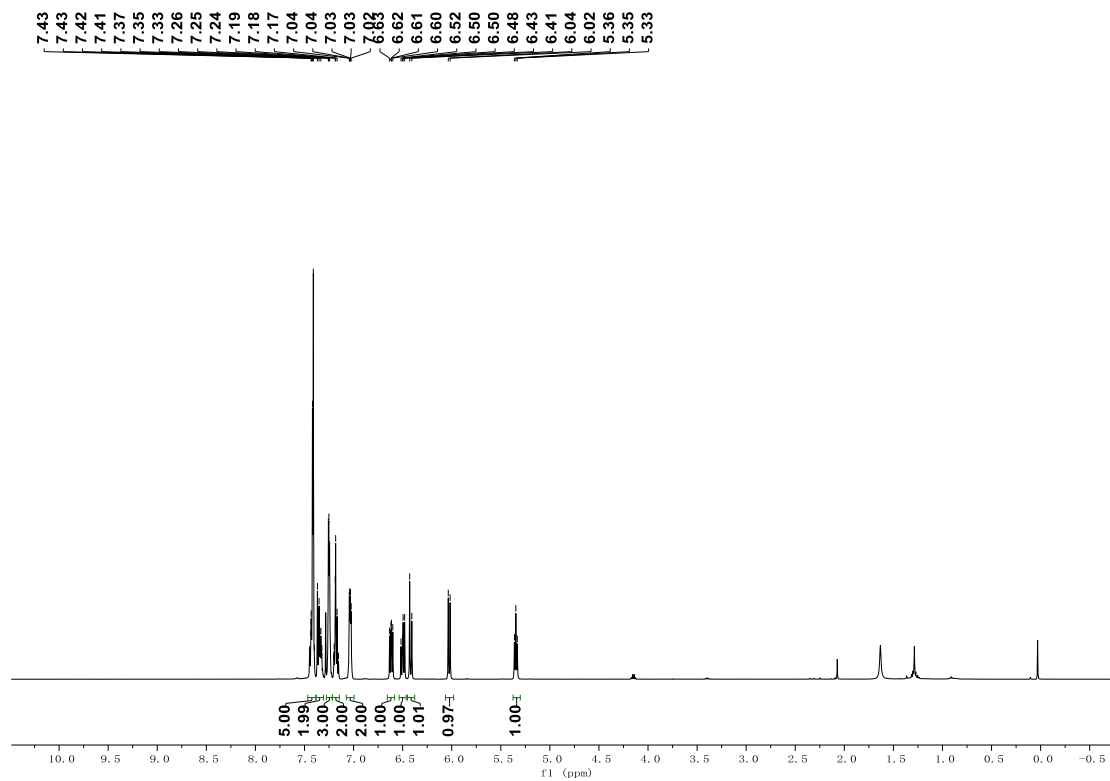

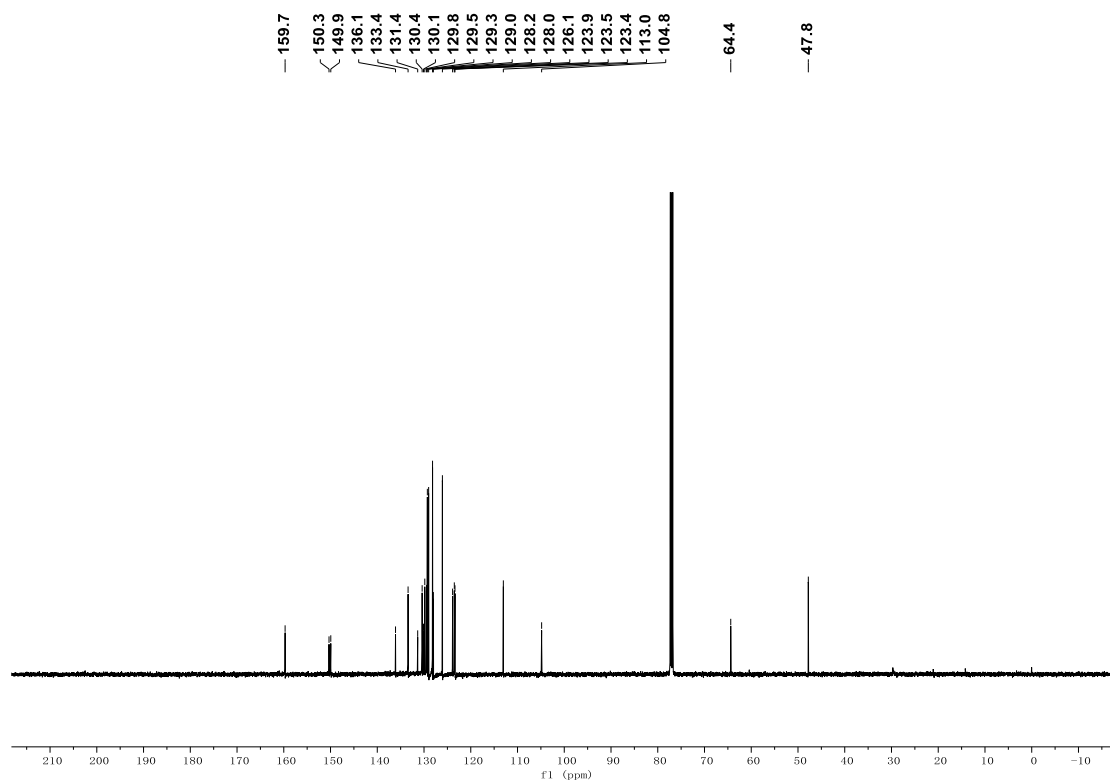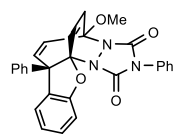

**11b**

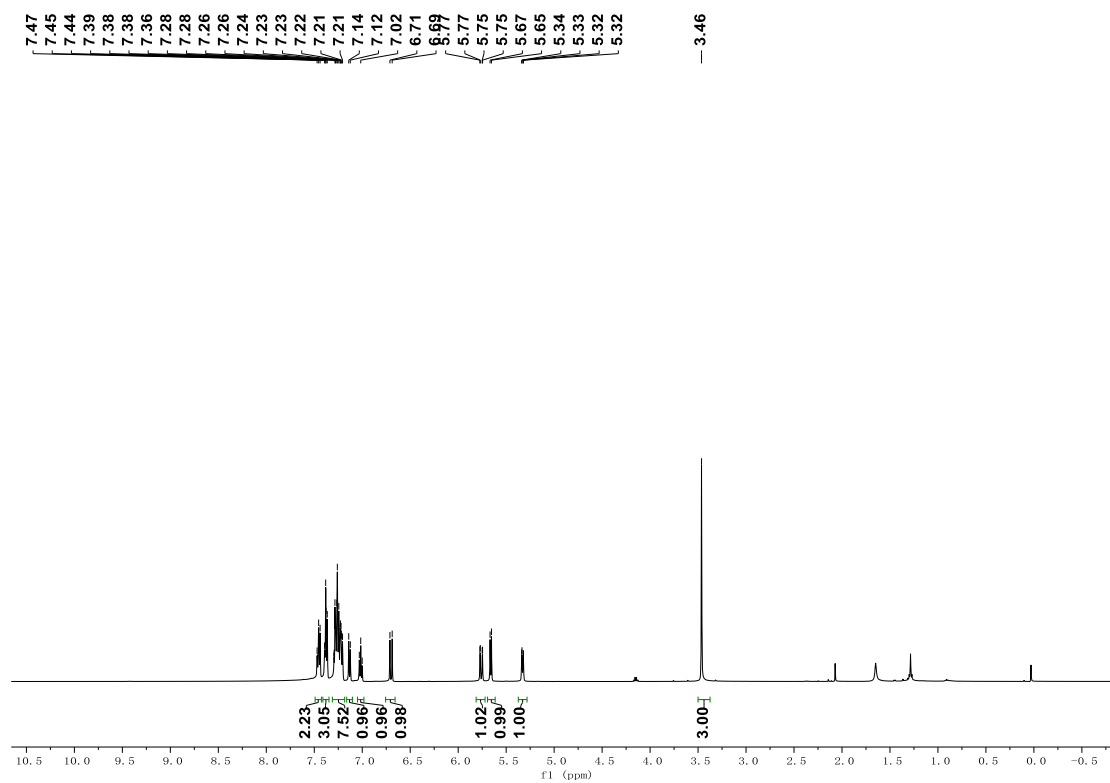

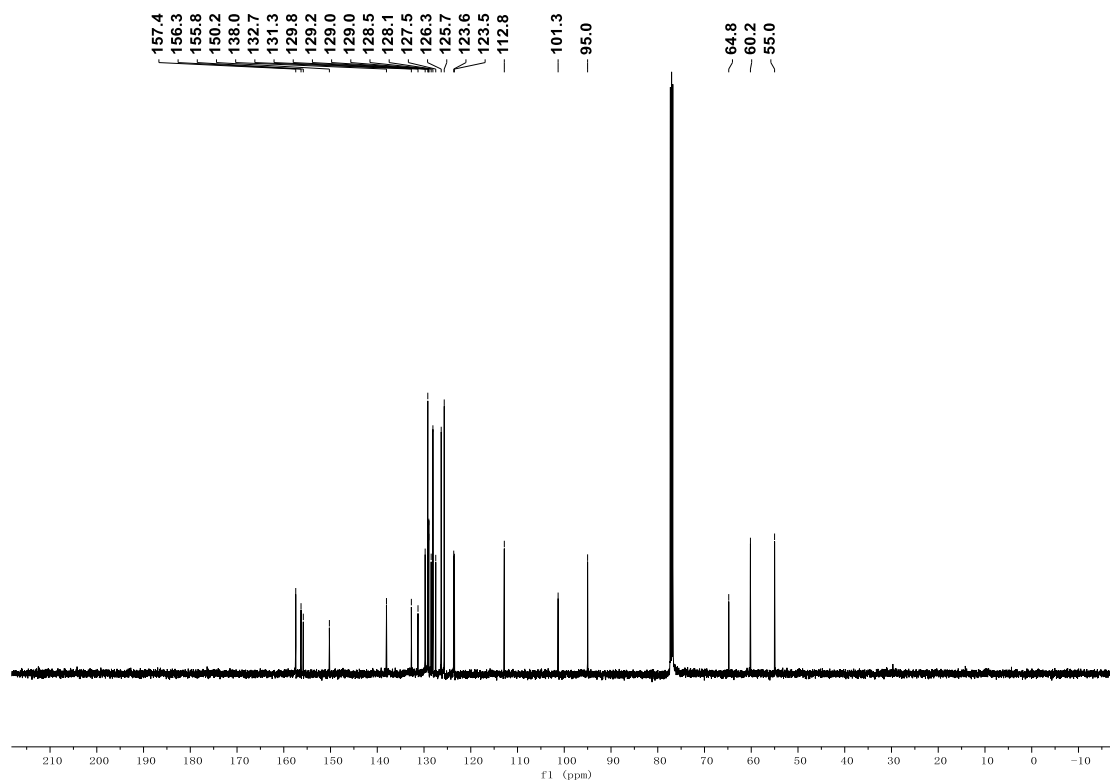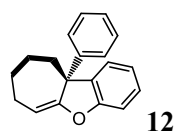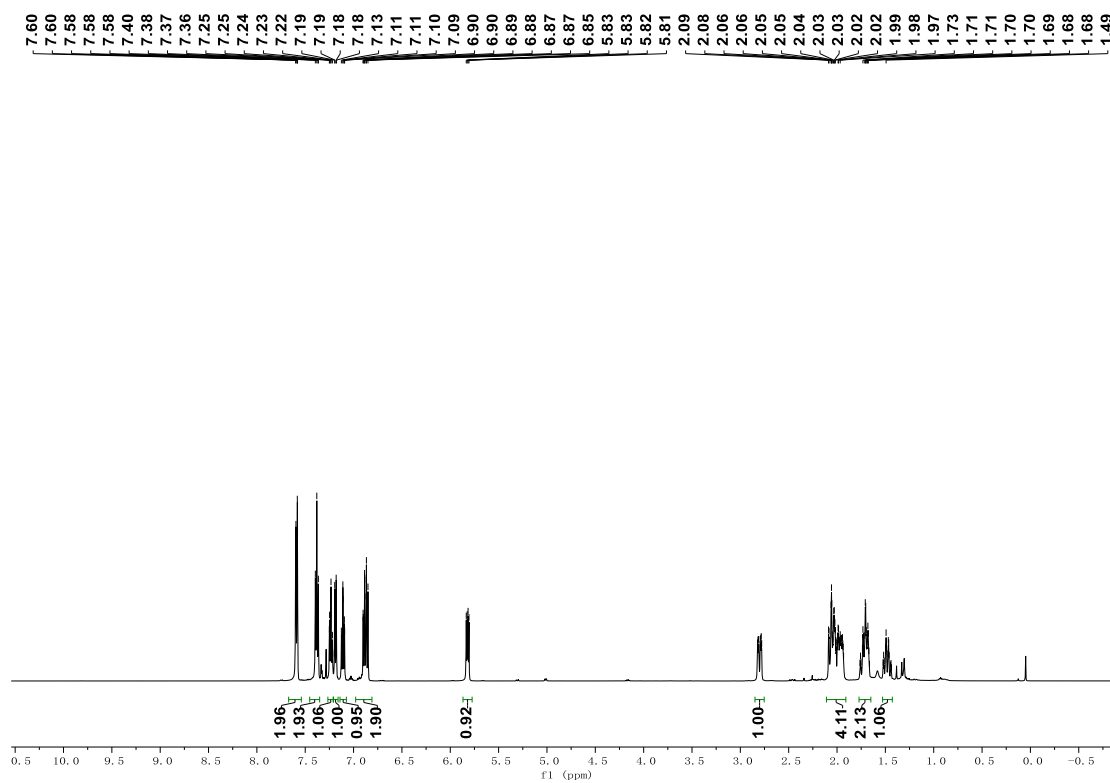

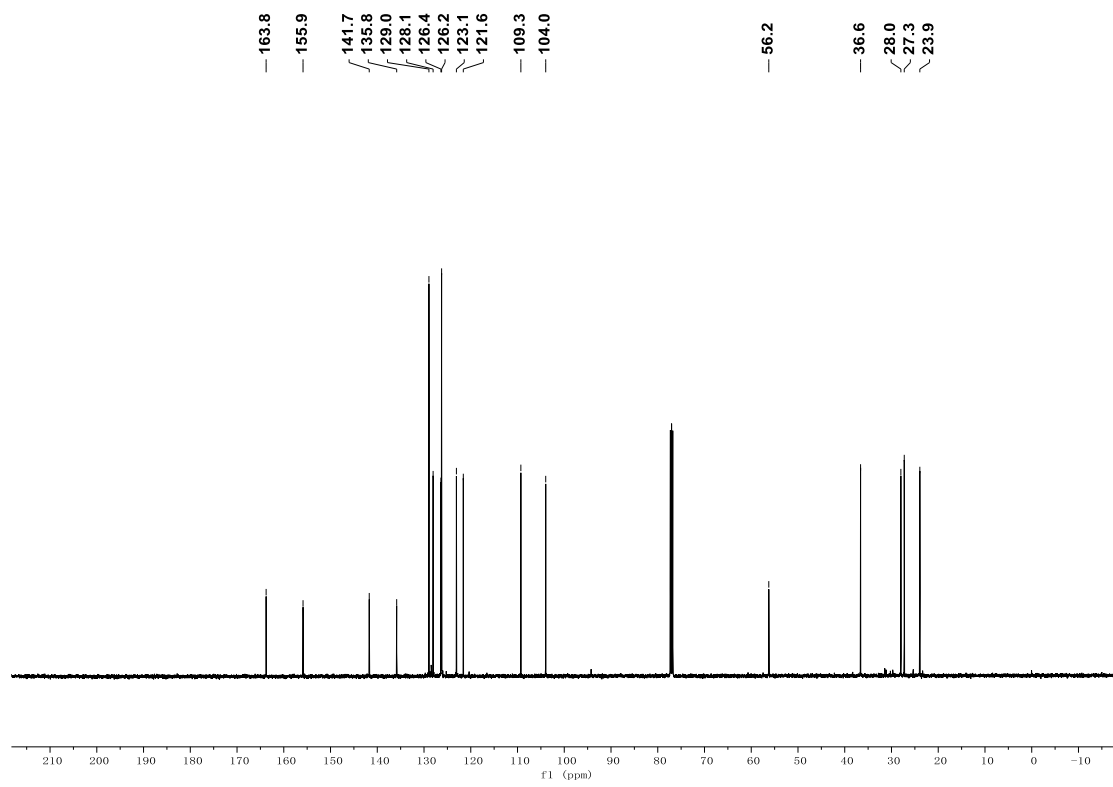



## 20. Data of HPLC

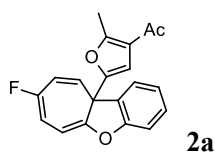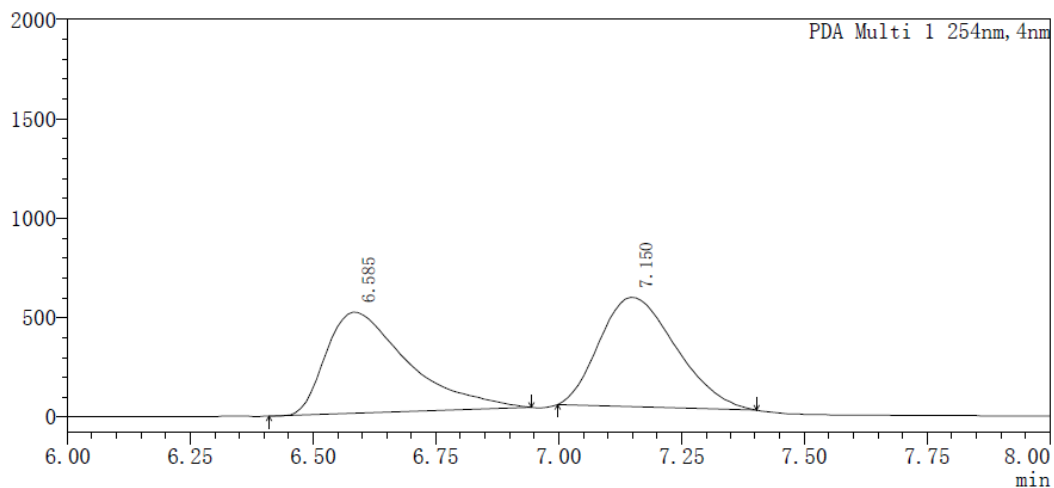

<峰表>

PDA Ch1 254nm

| 峰号 | 保留时间  | 面积       | 高度      | 化合物名 | 面积%     | 高度%     |
|----|-------|----------|---------|------|---------|---------|
| 1  | 6.585 | 5924618  | 508908  |      | 49.816  | 48.014  |
| 2  | 7.150 | 5968344  | 551000  |      | 50.184  | 51.986  |
| 总计 |       | 11892962 | 1059908 |      | 100.000 | 100.000 |

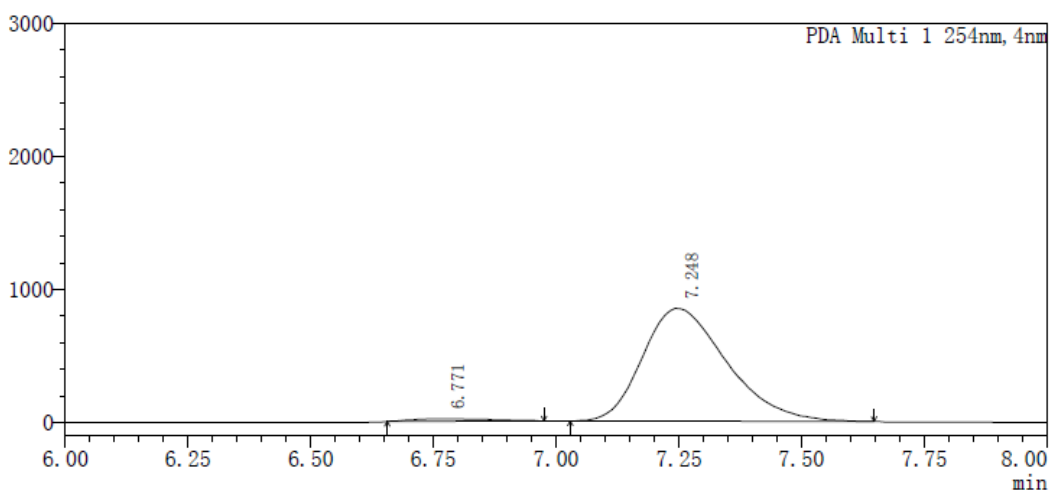

<峰表>

PDA Ch1 254nm

| 峰号 | 保留时间  | 面积       | 高度     | 化合物名 | 面积%     | 高度%     |
|----|-------|----------|--------|------|---------|---------|
| 1  | 6.771 | 202297   | 18612  |      | 1.964   | 2.152   |
| 2  | 7.248 | 10096260 | 846142 |      | 98.036  | 97.848  |
| 总计 |       | 10298557 | 864754 |      | 100.000 | 100.000 |

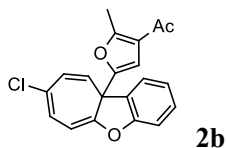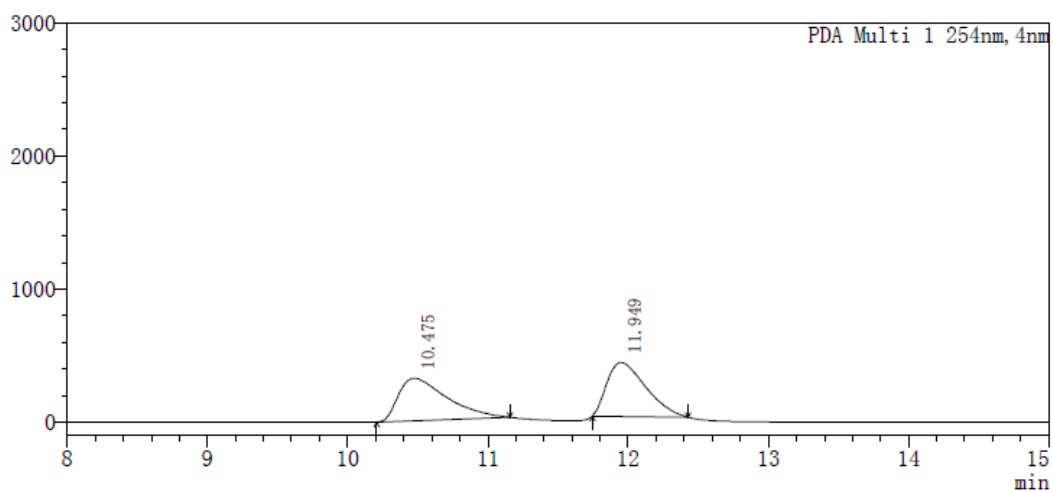

<峰表>

PDA Ch1 254nm

| 峰号 | 保留时间   | 面积       | 高度     | 化合物名 | 面积%     | 高度%     |
|----|--------|----------|--------|------|---------|---------|
| 1  | 10.475 | 7690956  | 319043 |      | 49.680  | 44.160  |
| 2  | 11.949 | 7789968  | 403431 |      | 50.320  | 55.840  |
| 总计 |        | 15480924 | 722474 |      | 100.000 | 100.000 |

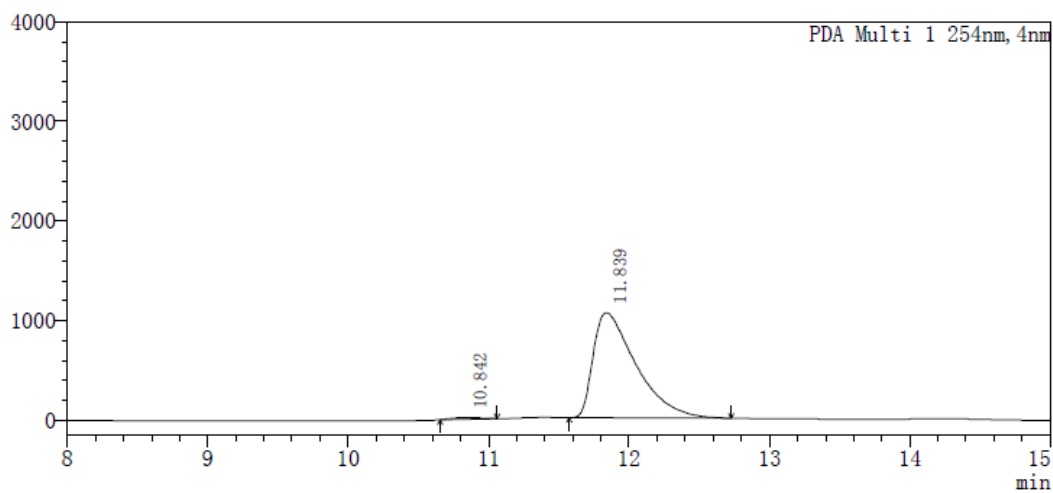

<峰表>

PDA Ch1 254nm

| 峰号 | 保留时间   | 面积       | 高度      | 化合物名 | 面积%     | 高度%     |
|----|--------|----------|---------|------|---------|---------|
| 1  | 10.842 | 232053   | 15616   |      | 1.026   | 1.459   |
| 2  | 11.839 | 22388679 | 1054883 |      | 98.974  | 98.541  |
| 总计 |        | 22620732 | 1070499 |      | 100.000 | 100.000 |

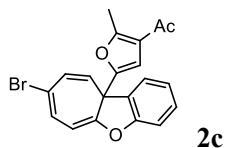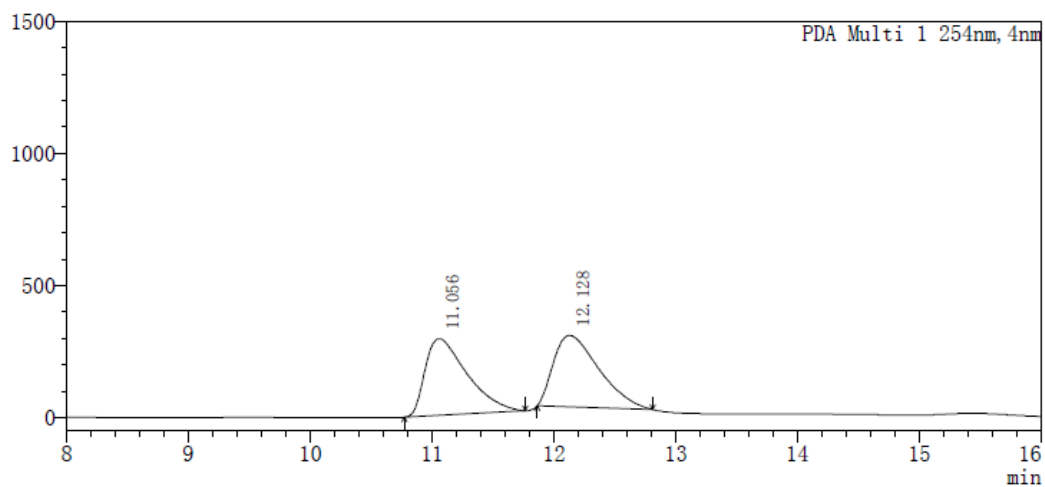

<峰表>

PDA Ch1 254nm

| 峰号 | 保留时间   | 面积       | 高度     | 化合物名 | 面积%     | 高度%     |
|----|--------|----------|--------|------|---------|---------|
| 1  | 11.056 | 6963614  | 290291 |      | 49.729  | 51.749  |
| 2  | 12.128 | 7039482  | 270666 |      | 50.271  | 48.251  |
| 总计 |        | 14003096 | 560957 |      | 100.000 | 100.000 |

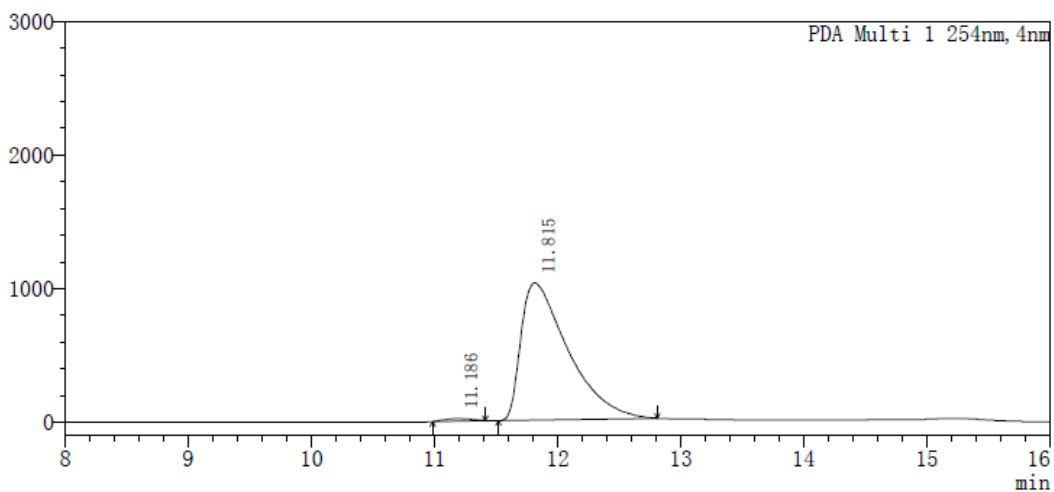

<峰表>

PDA Ch1 254nm

| 峰号 | 保留时间   | 面积       | 高度      | 化合物名 | 面积%     | 高度%     |
|----|--------|----------|---------|------|---------|---------|
| 1  | 11.186 | 270703   | 17964   |      | 0.978   | 1.718   |
| 2  | 11.815 | 27417314 | 1027428 |      | 99.022  | 98.282  |
| 总计 |        | 27688016 | 1045392 |      | 100.000 | 100.000 |

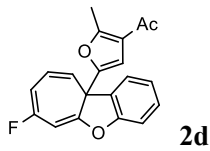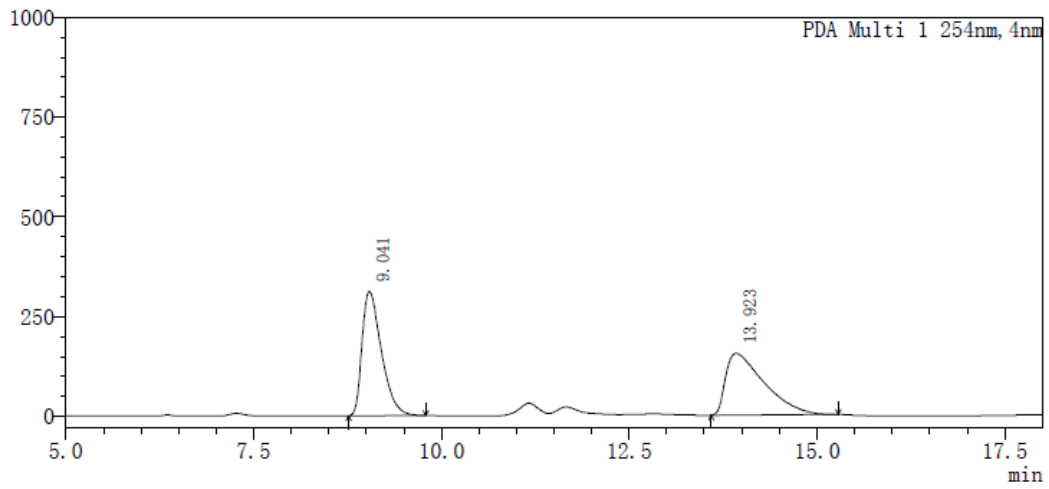

<峰表>

PDA Ch1 254nm

| 峰号 | 保留时间   | 面积       | 高度     | 化合物名 | 面积%     | 高度%     |
|----|--------|----------|--------|------|---------|---------|
| 1  | 9.041  | 5596521  | 311889 |      | 50.255  | 66.753  |
| 2  | 13.923 | 5539822  | 155337 |      | 49.745  | 33.247  |
| 总计 |        | 11136343 | 467225 |      | 100.000 | 100.000 |

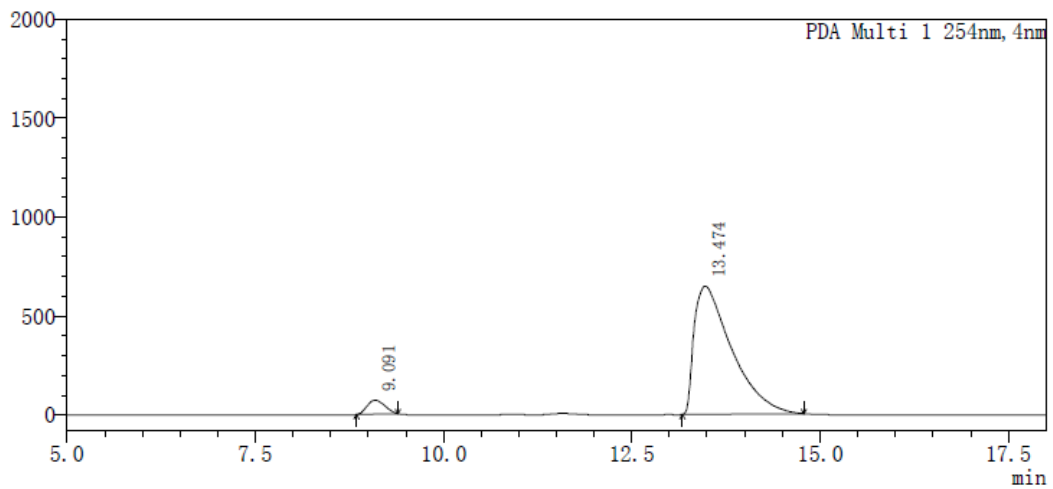

<峰表>

PDA Ch1 254nm

| 峰号 | 保留时间   | 面积       | 高度     | 化合物名 | 面积%     | 高度%     |
|----|--------|----------|--------|------|---------|---------|
| 1  | 9.091  | 1163235  | 70702  |      | 4.920   | 9.832   |
| 2  | 13.474 | 22479278 | 648370 |      | 95.080  | 90.168  |
| 总计 |        | 23642513 | 719072 |      | 100.000 | 100.000 |

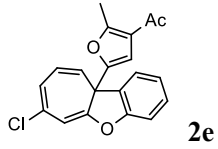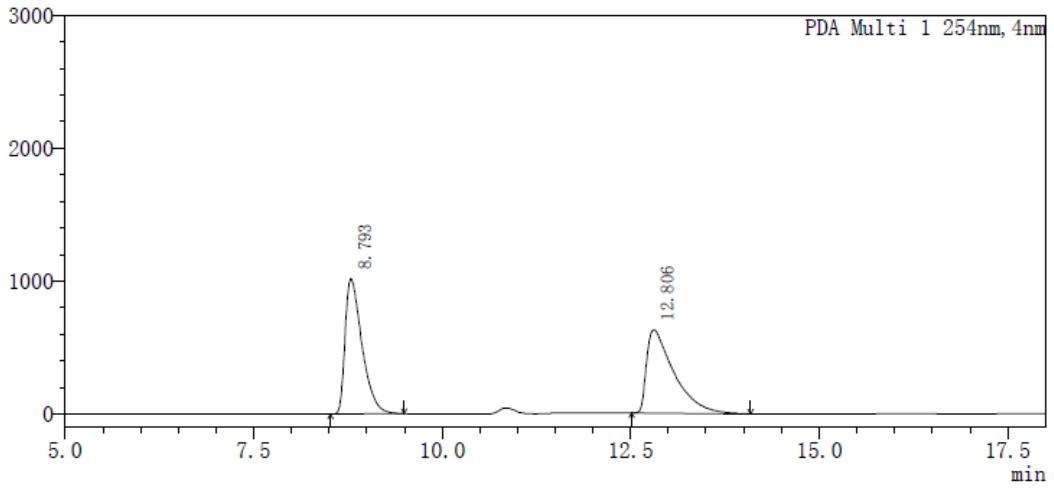

<峰表>

PDA Ch1 254nm

| 峰号 | 保留时间   | 面积       | 高度      | 化合物名 | 面积%     | 高度%     |
|----|--------|----------|---------|------|---------|---------|
| 1  | 8.793  | 15876381 | 1016350 |      | 50.205  | 61.885  |
| 2  | 12.806 | 15746983 | 625980  |      | 49.795  | 38.115  |
| 总计 |        | 31623364 | 1642330 |      | 100.000 | 100.000 |

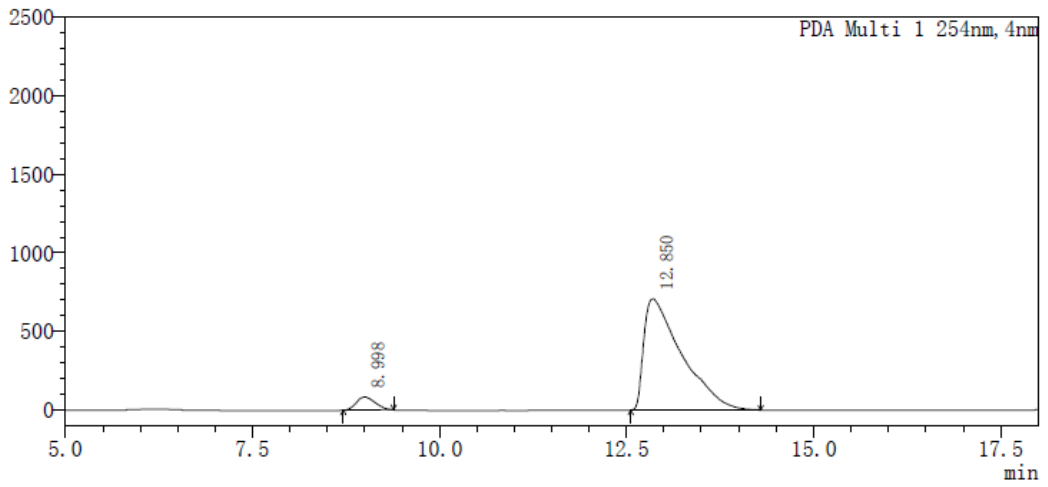

<峰表>

PDA Ch1 254nm

| 峰号 | 保留时间   | 面积       | 高度     | 化合物名 | 面积%     | 高度%     |
|----|--------|----------|--------|------|---------|---------|
| 1  | 8.998  | 1463115  | 82498  |      | 5.555   | 10.451  |
| 2  | 12.850 | 24876275 | 706889 |      | 94.445  | 89.549  |
| 总计 |        | 26339390 | 789387 |      | 100.000 | 100.000 |

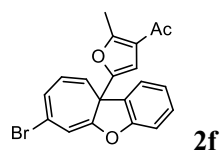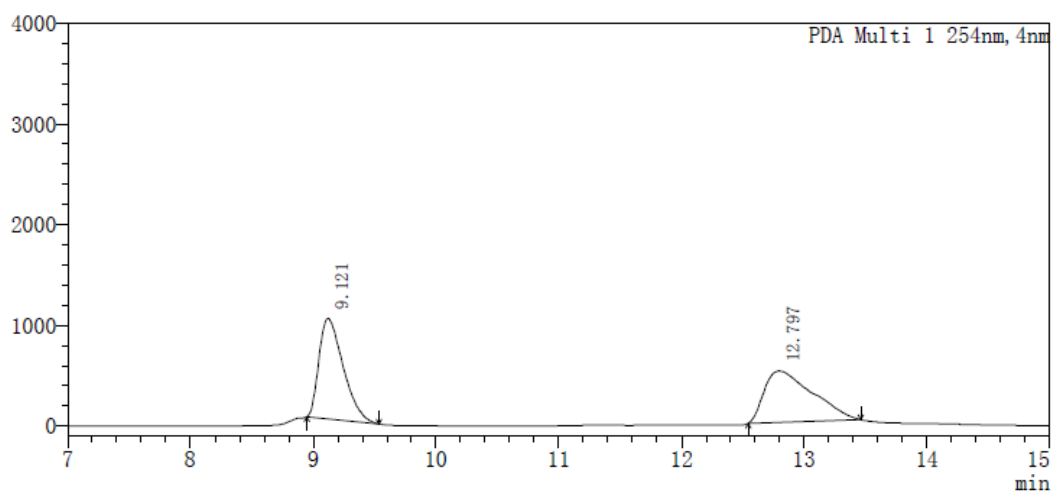

<峰表>

PDA Ch1 254nm

| 峰号 | 保留时间   | 面积       | 高度      | 化合物名 | 面积%     | 高度%     |
|----|--------|----------|---------|------|---------|---------|
| 1  | 9.121  | 13649733 | 996078  |      | 49.692  | 66.255  |
| 2  | 12.797 | 13818669 | 507332  |      | 50.308  | 33.745  |
| 总计 |        | 27468401 | 1503409 |      | 100.000 | 100.000 |

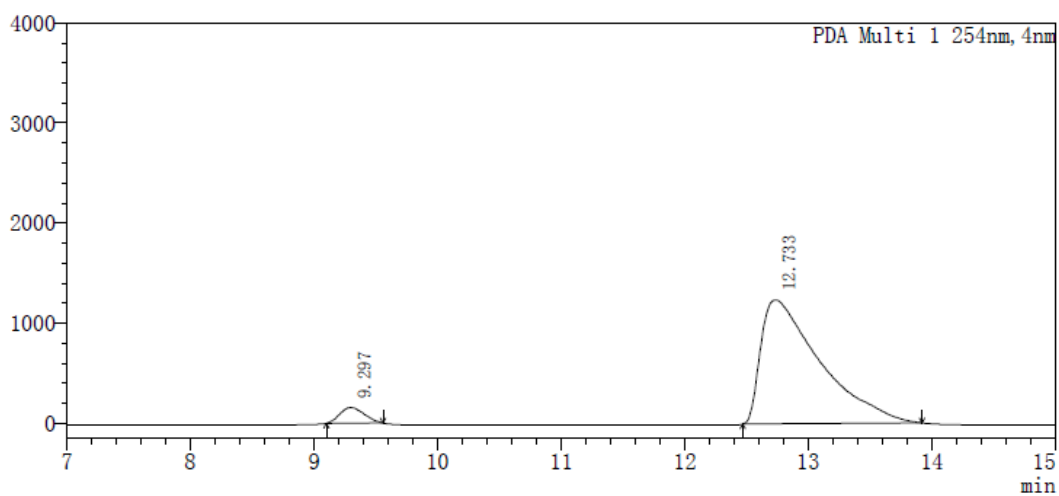

<峰表>

PDA Ch1 254nm

| 峰号 | 保留时间   | 面积       | 高度      | 化合物名 | 面积%     | 高度%     |
|----|--------|----------|---------|------|---------|---------|
| 1  | 9.297  | 2122820  | 155440  |      | 4.885   | 11.150  |
| 2  | 12.733 | 41330739 | 1238675 |      | 95.115  | 88.850  |
| 总计 |        | 43453559 | 1394115 |      | 100.000 | 100.000 |

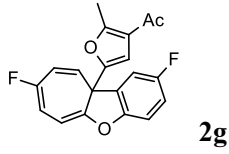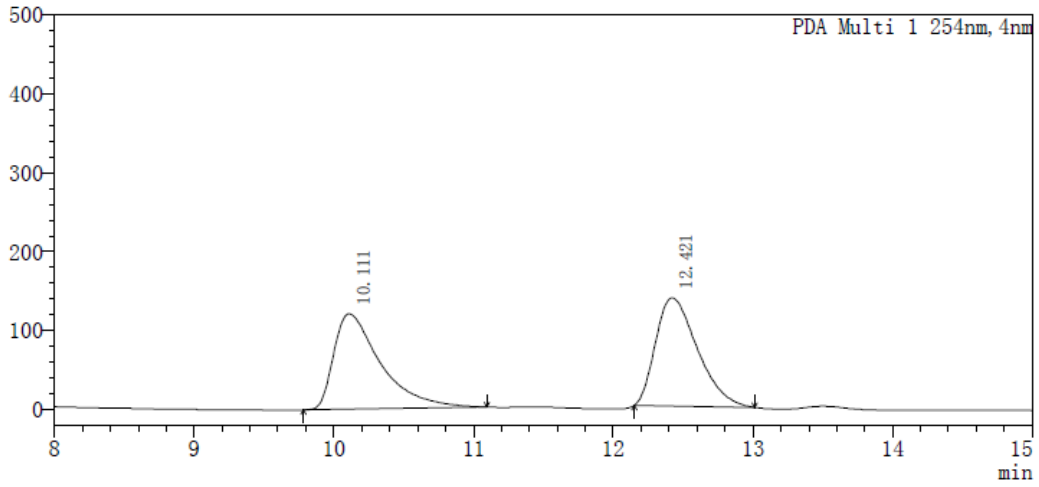

<峰表>

PDA Ch1 254nm

| 峰号 | 保留时间   | 面积      | 高度     | 化合物名 | 面积%     | 高度%     |
|----|--------|---------|--------|------|---------|---------|
| 1  | 10.111 | 2818837 | 120678 |      | 49.752  | 46.866  |
| 2  | 12.421 | 2846928 | 136817 |      | 50.248  | 53.134  |
| 总计 |        | 5665765 | 257495 |      | 100.000 | 100.000 |

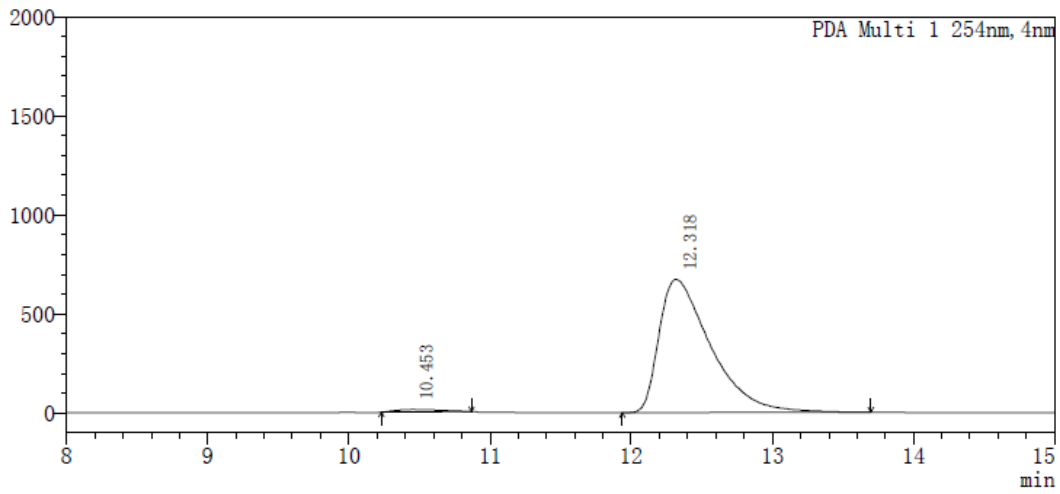

<峰表>

PDA Ch1 254nm

| 峰号 | 保留时间   | 面积       | 高度     | 化合物名 | 面积%     | 高度%     |
|----|--------|----------|--------|------|---------|---------|
| 1  | 10.453 | 265352   | 12066  |      | 1.529   | 1.763   |
| 2  | 12.318 | 17085696 | 672533 |      | 98.471  | 98.237  |
| 总计 |        | 17351048 | 684599 |      | 100.000 | 100.000 |

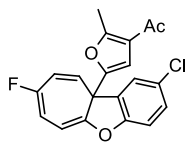

2h

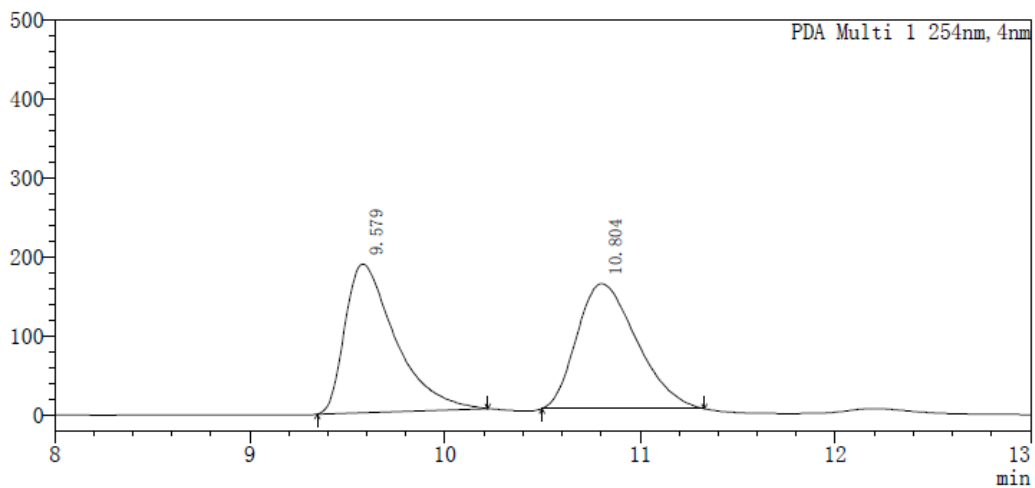

<峰表>

PDA Ch1 254nm

| 峰号 | 保留时间   | 面积      | 高度     | 化合物名 | 面积%     | 高度%     |
|----|--------|---------|--------|------|---------|---------|
| 1  | 9.579  | 3380453 | 187989 |      | 49.934  | 54.274  |
| 2  | 10.804 | 3389375 | 158379 |      | 50.066  | 45.726  |
| 总计 |        | 6769827 | 346368 |      | 100.000 | 100.000 |

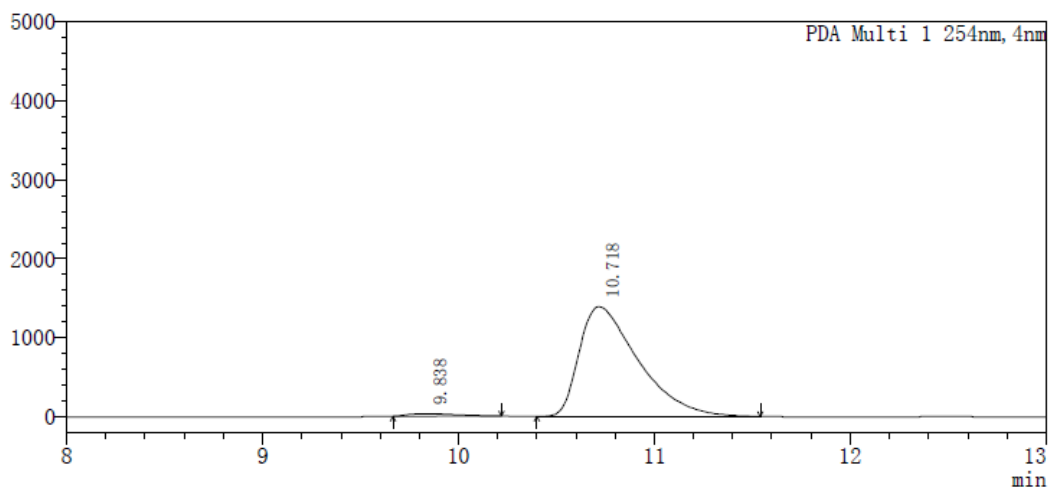

<峰表>

PDA Ch1 254nm

| 峰号 | 保留时间   | 面积       | 高度      | 化合物名 | 面积%     | 高度%     |
|----|--------|----------|---------|------|---------|---------|
| 1  | 9.838  | 552976   | 34077   |      | 1.869   | 2.399   |
| 2  | 10.718 | 29033764 | 1386579 |      | 98.131  | 97.601  |
| 总计 |        | 29586740 | 1420656 |      | 100.000 | 100.000 |



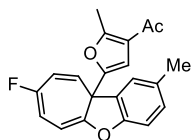

2i

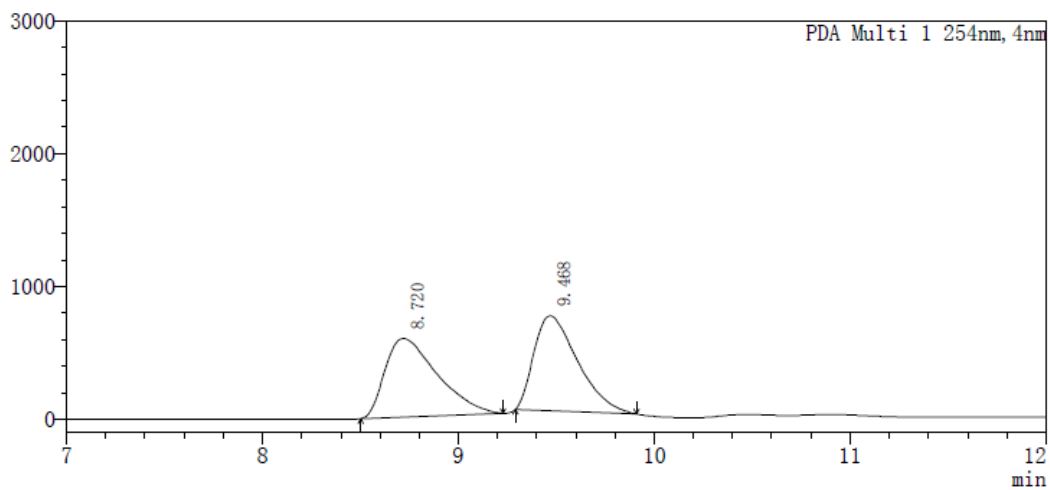

<峰表>

PDA Ch1 254nm

| 峰号 | 保留时间  | 面积       | 高度      | 化合物名 | 面积%     | 高度%     |
|----|-------|----------|---------|------|---------|---------|
| 1  | 8.720 | 10958318 | 591396  |      | 49.626  | 45.303  |
| 2  | 9.468 | 11123301 | 714029  |      | 50.374  | 54.697  |
| 总计 |       | 22081619 | 1305424 |      | 100.000 | 100.000 |

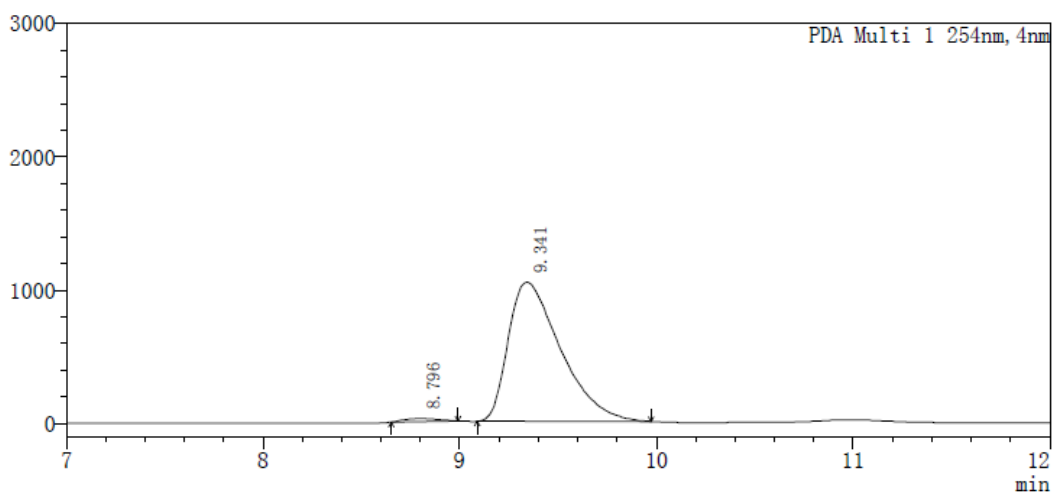

<峰表>

PDA Ch1 254nm

| 峰号 | 保留时间  | 面积       | 高度      | 化合物名 | 面积%     | 高度%     |
|----|-------|----------|---------|------|---------|---------|
| 1  | 8.796 | 272419   | 22686   |      | 1.388   | 2.127   |
| 2  | 9.341 | 19361338 | 1043999 |      | 98.612  | 97.873  |
| 总计 |       | 19633756 | 1066684 |      | 100.000 | 100.000 |

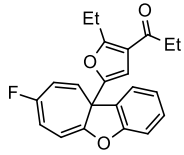

2j

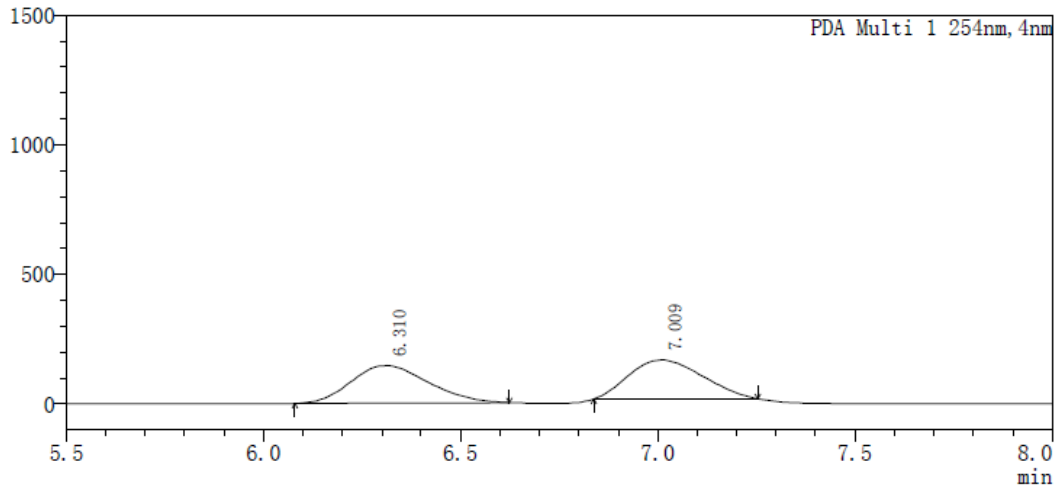

<峰表>

PDA Ch1 254nm

| 峰号 | 保留时间  | 面积      | 高度     | 化合物名 | 面积%     | 高度%     |
|----|-------|---------|--------|------|---------|---------|
| 1  | 6.310 | 1977886 | 144565 |      | 50.285  | 49.013  |
| 2  | 7.009 | 1955450 | 150385 |      | 49.715  | 50.987  |
| 总计 |       | 3933336 | 294949 |      | 100.000 | 100.000 |

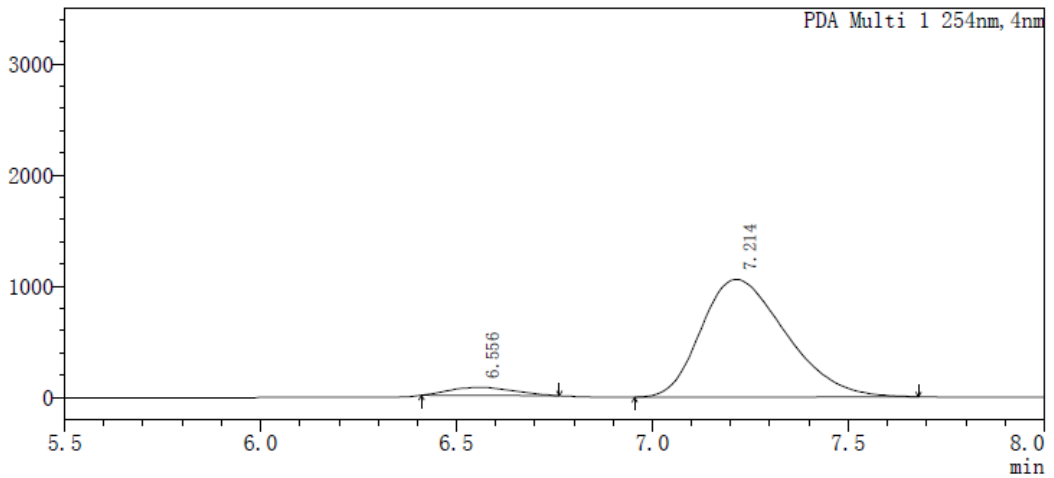

<峰表>

PDA Ch1 254nm

| 峰号 | 保留时间  | 面积       | 高度      | 化合物名 | 面积%     | 高度%     |
|----|-------|----------|---------|------|---------|---------|
| 1  | 6.556 | 846283   | 72988   |      | 5.041   | 6.458   |
| 2  | 7.214 | 15940130 | 1057273 |      | 94.959  | 93.542  |
| 总计 |       | 16786413 | 1130262 |      | 100.000 | 100.000 |

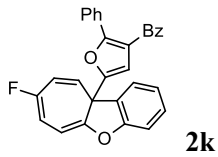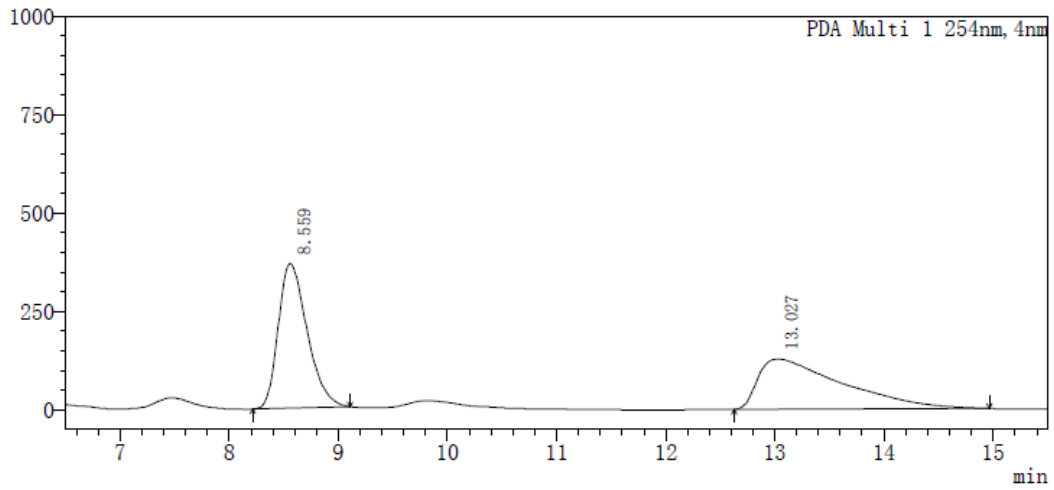

<峰表>

PDA Ch1 254nm

| 峰号 | 保留时间   | 面积       | 高度     | 化合物名 | 面积%     | 高度%     |
|----|--------|----------|--------|------|---------|---------|
| 1  | 8.559  | 6779700  | 367581 |      | 49.842  | 74.261  |
| 2  | 13.027 | 6822812  | 127405 |      | 50.158  | 25.739  |
| 总计 |        | 13602512 | 494986 |      | 100.000 | 100.000 |

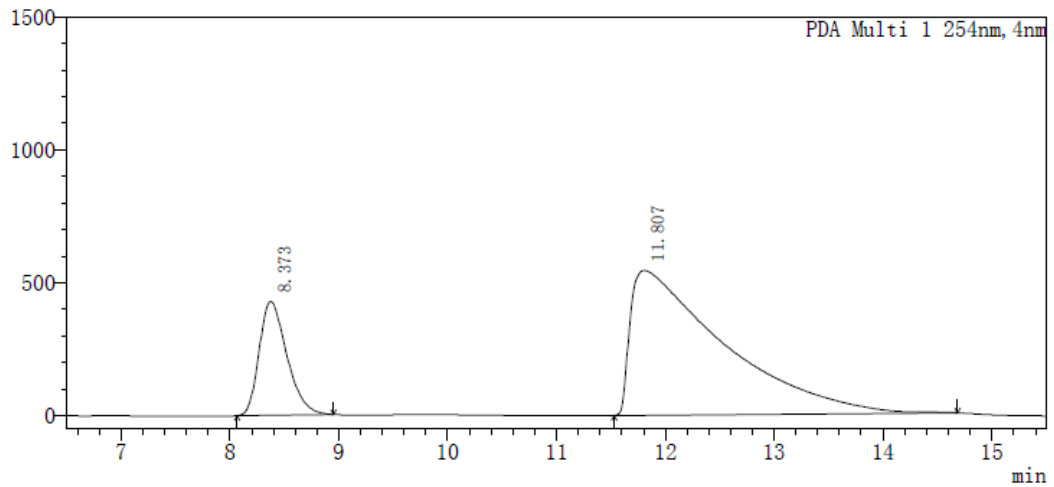

<峰表>

PDA Ch1 254nm

| 峰号 | 保留时间   | 面积       | 高度     | 化合物名 | 面积%     | 高度%     |
|----|--------|----------|--------|------|---------|---------|
| 1  | 8.373  | 7586281  | 428071 |      | 19.024  | 44.006  |
| 2  | 11.807 | 32291010 | 544681 |      | 80.976  | 55.994  |
| 总计 |        | 39877291 | 972753 |      | 100.000 | 100.000 |

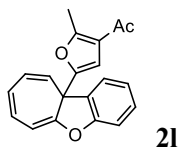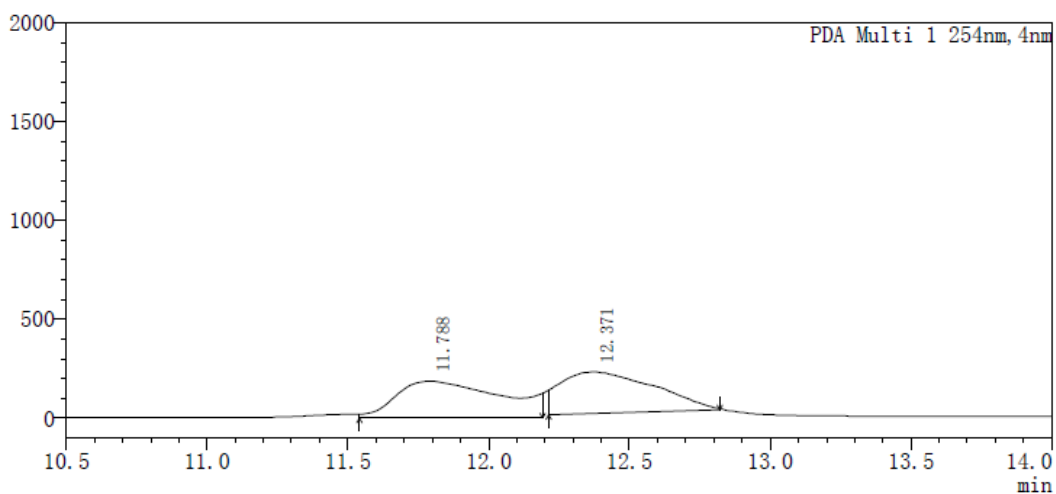

<峰表>

PDA Ch1 254nm

| 峰号 | 保留时间   | 面积      | 高度     | 化合物名 | 面积%     | 高度%     |
|----|--------|---------|--------|------|---------|---------|
| 1  | 11.788 | 4875208 | 186102 |      | 50.187  | 47.027  |
| 2  | 12.371 | 4838782 | 209632 |      | 49.813  | 52.973  |
| 总计 |        | 9713989 | 395734 |      | 100.000 | 100.000 |

mAU

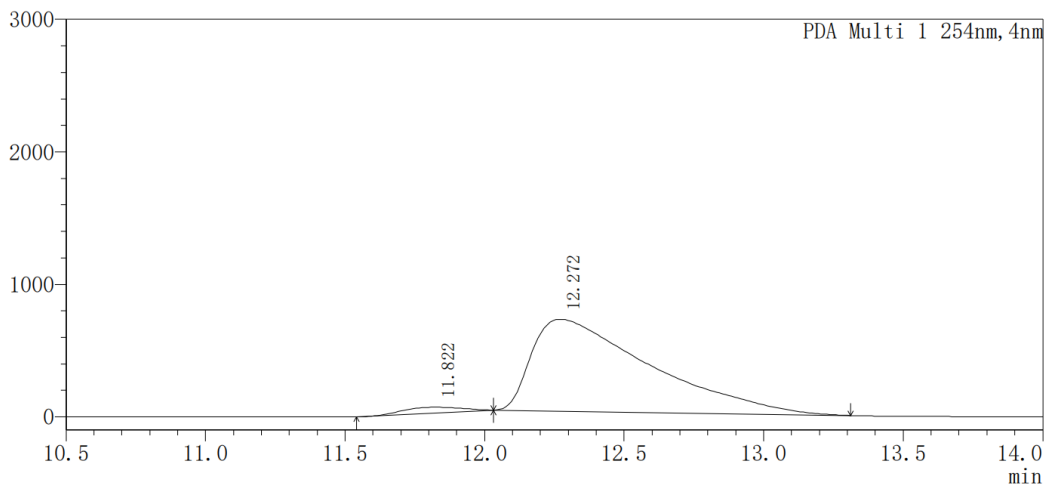

<峰表>

PDA Ch1 254nm

| 峰号 | 保留时间   | 面积       | 高度     | 化合物名 | 面积%     | 高度%     |
|----|--------|----------|--------|------|---------|---------|
| 1  | 11.822 | 651763   | 43430  |      | 3.088   | 5.894   |
| 2  | 12.272 | 20453331 | 693430 |      | 96.912  | 94.106  |
| 总计 |        | 21105094 | 736860 |      | 100.000 | 100.000 |

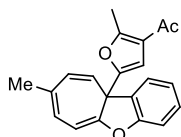

**21** (The racemic sample can't be obtained from  $Rh_2(OPiv)_4$  and other Rh(II)-catalyzed conditions, the enantiomers was identified from UV spectrum with Shimadzu LabSolutions)

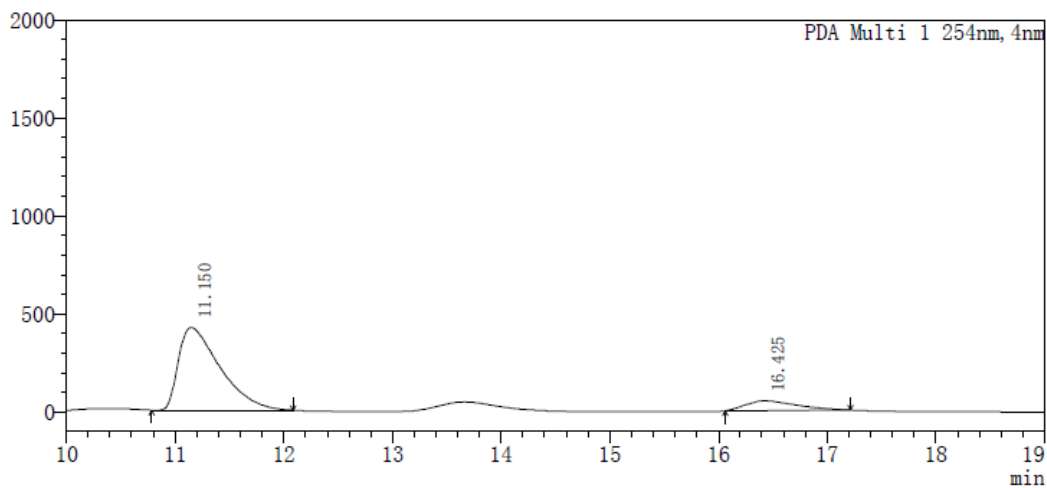

<峰表>

PDA Ch1 254nm

| 峰号 | 保留时间   | 面积       | 高度     | 化合物名 | 面积%     | 高度%     |
|----|--------|----------|--------|------|---------|---------|
| 1  | 11.150 | 11257463 | 422156 |      | 87.441  | 89.485  |
| 2  | 16.425 | 1616895  | 49605  |      | 12.559  | 10.515  |
| 总计 |        | 12874358 | 471761 |      | 100.000 | 100.000 |

The major enantiomer's UV spectrum

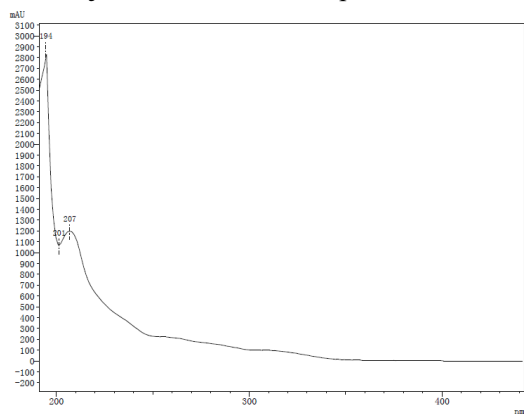

The minor enantiomer's UV spectrum

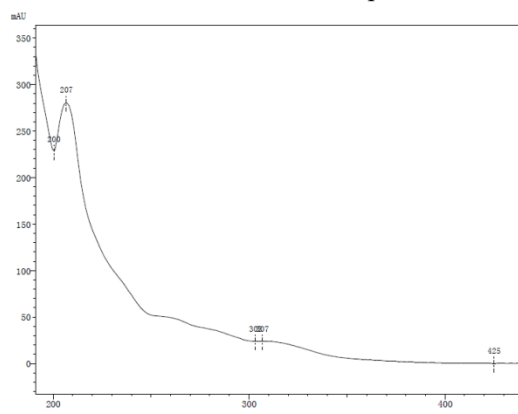

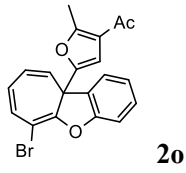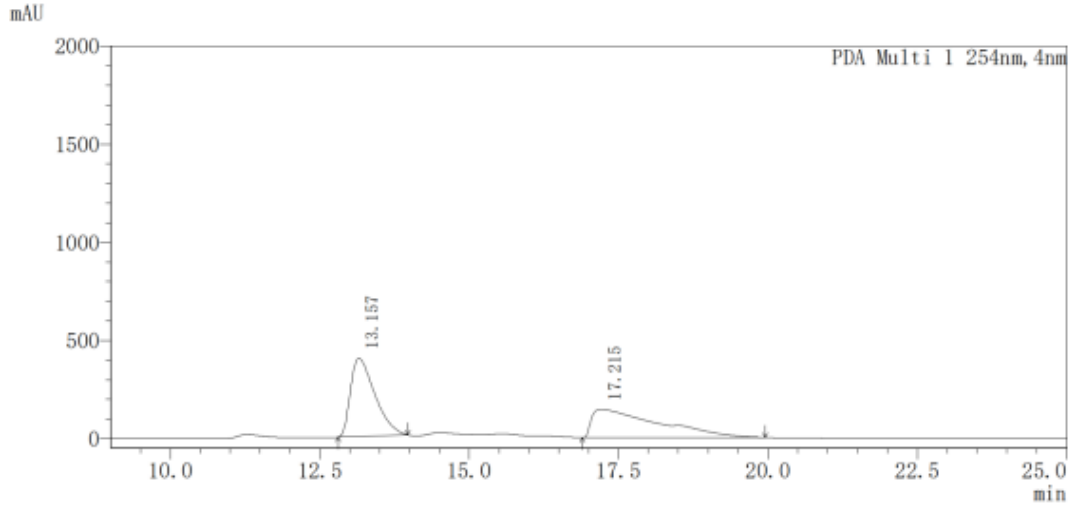

<峰表>

PDA Ch1 254nm

| 峰号 | 保留时间   | 面积       | 高度     | 化合物名 | 面积%     | 高度%     |
|----|--------|----------|--------|------|---------|---------|
| 1  | 13.157 | 11292744 | 398509 |      | 50.330  | 73.504  |
| 2  | 17.215 | 11144744 | 143649 |      | 49.670  | 26.496  |
| 总计 |        | 22437488 | 542158 |      | 100.000 | 100.000 |

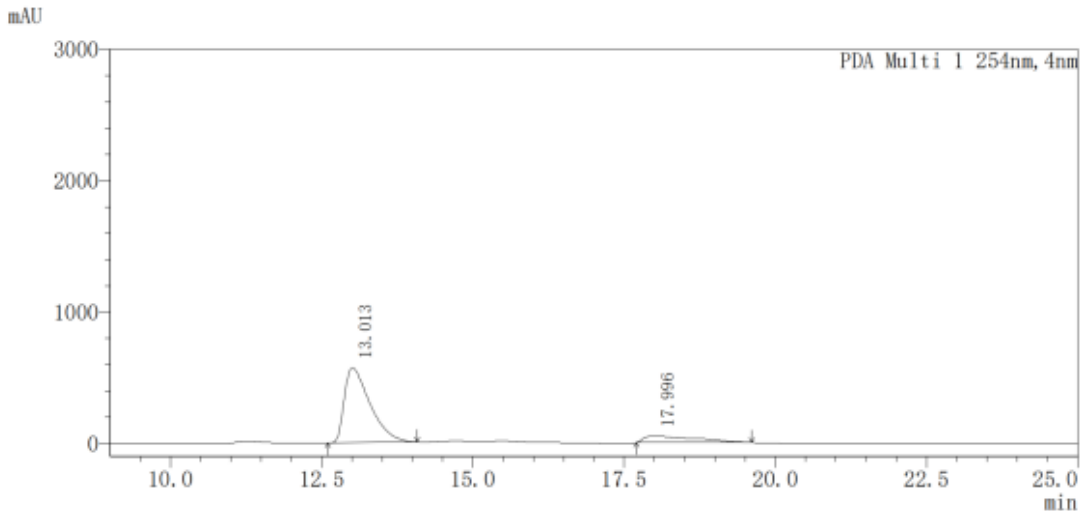

<峰表>

PDA Ch1 254nm

| 峰号 | 保留时间   | 面积       | 高度     | 化合物名 | 面积%     | 高度%     |
|----|--------|----------|--------|------|---------|---------|
| 1  | 13.013 | 16852688 | 569364 |      | 84.952  | 92.124  |
| 2  | 17.996 | 2985136  | 48680  |      | 15.048  | 7.876   |
| 总计 |        | 19837824 | 618044 |      | 100.000 | 100.000 |

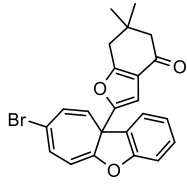

**2p**

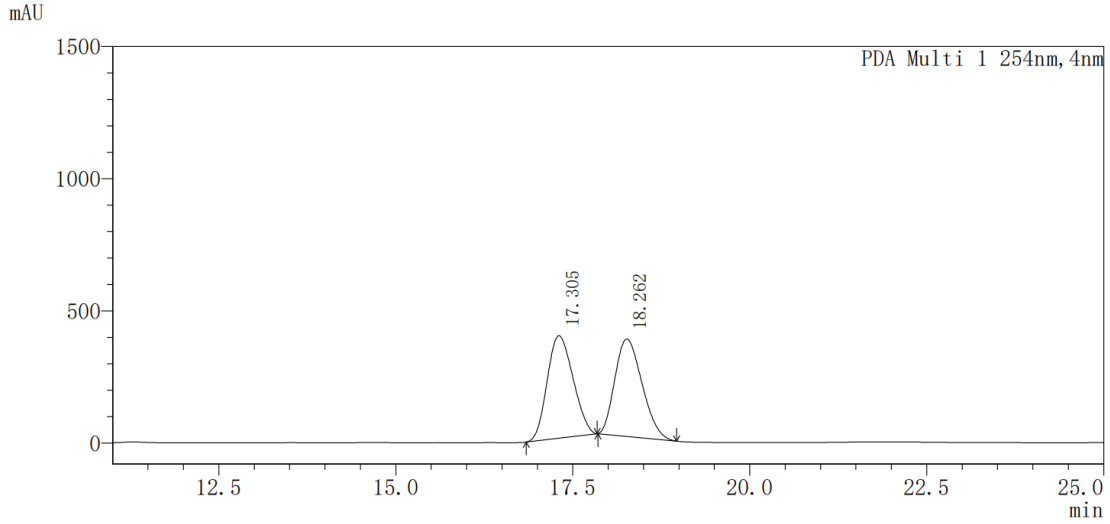

<峰表>

PDA Ch1 254nm

| 峰号 | 保留时间   | 面积       | 高度     | 面积%     | 高度%     |
|----|--------|----------|--------|---------|---------|
| 1  | 17.305 | 9865361  | 387918 | 50.024  | 51.267  |
| 2  | 18.262 | 9855760  | 368742 | 49.976  | 48.733  |
| 总计 |        | 19721121 | 756660 | 100.000 | 100.000 |

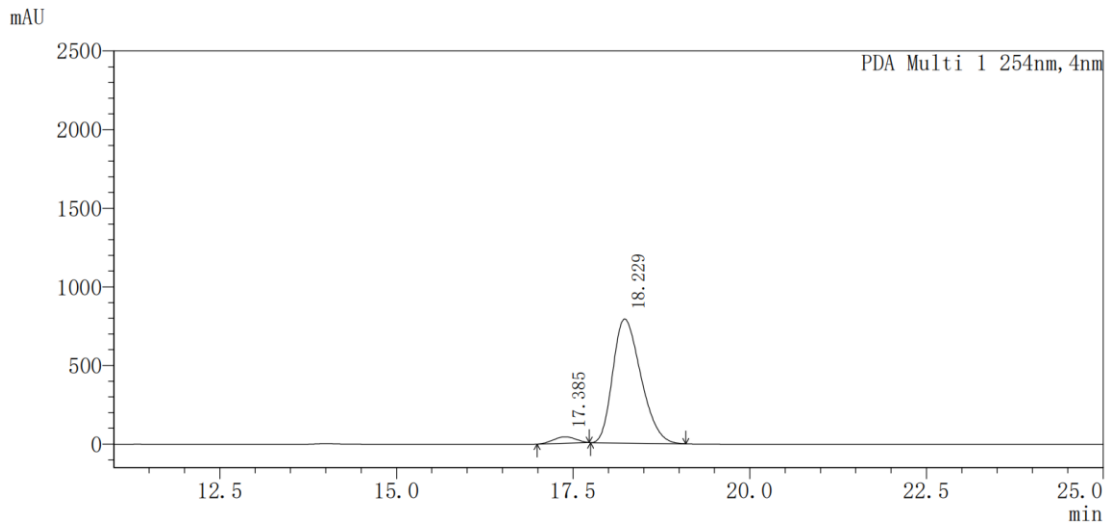

<峰表>

PDA Ch1 254nm

| 峰号 | 保留时间   | 面积       | 高度     | 面积%     | 高度%     |
|----|--------|----------|--------|---------|---------|
| 1  | 17.385 | 904571   | 41037  | 3.972   | 4.941   |
| 2  | 18.229 | 21868019 | 789584 | 96.028  | 95.059  |
| 总计 |        | 22772590 | 830620 | 100.000 | 100.000 |

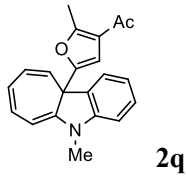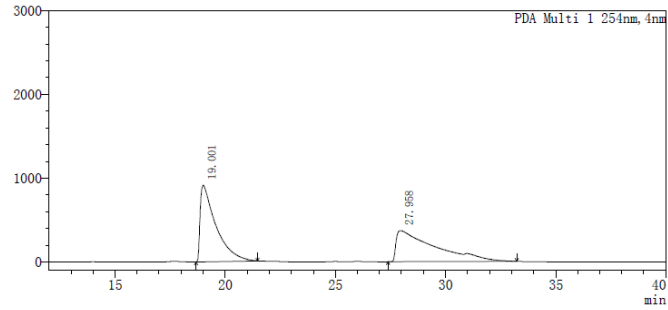

<峰表>

| 峰号 | 保留时间   | 面积       | 高度      | 化合物名 | 面积%     | 高度%     |
|----|--------|----------|---------|------|---------|---------|
| 1  | 19.001 | 45389411 | 911802  |      | 49.930  | 71.022  |
| 2  | 27.958 | 45515894 | 372034  |      | 50.070  | 28.978  |
| 总计 |        | 90905305 | 1283837 |      | 100.000 | 100.000 |

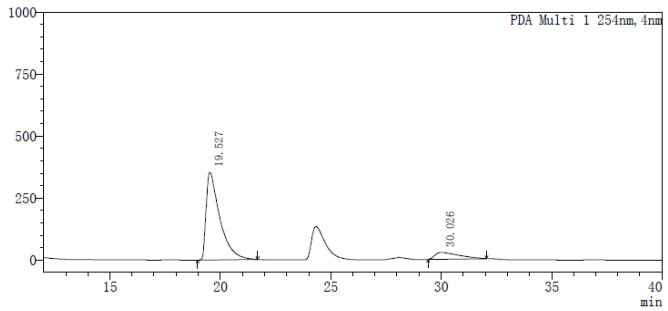

<峰表>

| 峰号 | 保留时间   | 面积       | 高度     | 化合物名 | 面积%     | 高度%     |
|----|--------|----------|--------|------|---------|---------|
| 1  | 19.527 | 15189725 | 353982 |      | 87.989  | 92.837  |
| 2  | 30.026 | 2073524  | 27311  |      | 12.011  | 7.163   |
| 总计 |        | 17263250 | 381293 |      | 100.000 | 100.000 |

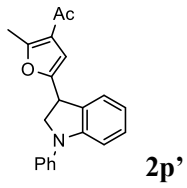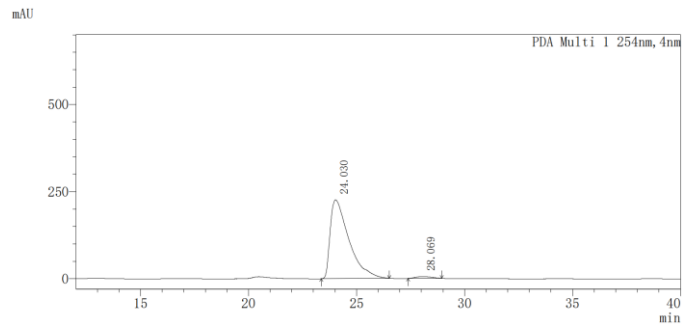

<峰表>

| 峰号 | 保留时间   | 面积       | 高度     | 化合物名 | 面积%     | 高度%     |
|----|--------|----------|--------|------|---------|---------|
| 1  | 24.030 | 13605323 | 226222 |      | 98.047  | 97.675  |
| 2  | 28.069 | 270939   | 5386   |      | 1.953   | 2.325   |
| 总计 |        | 13876262 | 231608 |      | 100.000 | 100.000 |



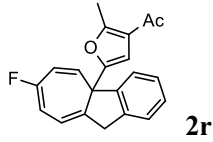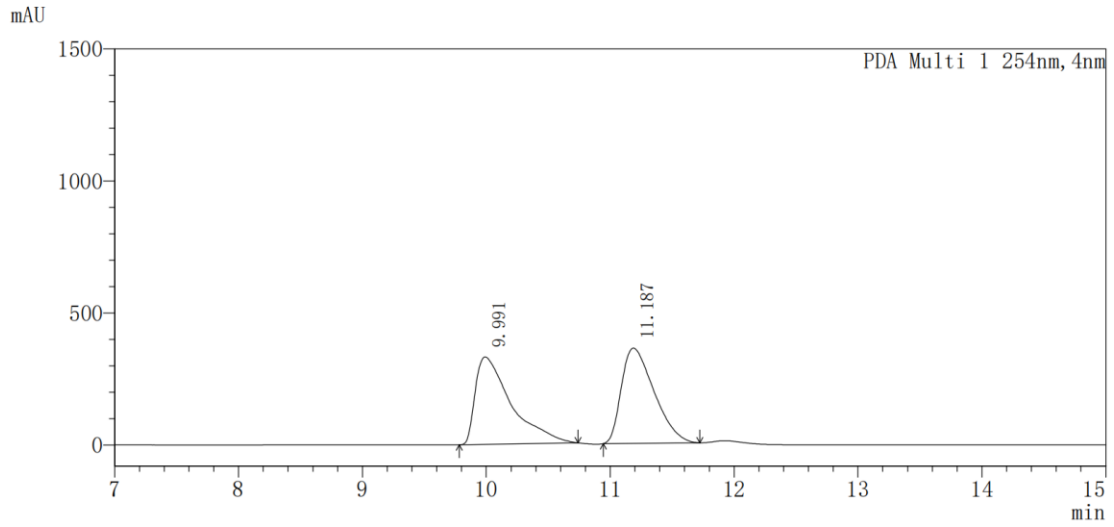

<峰表>

PDA Ch1 254nm

| 峰号 | 保留时间   | 面积       | 高度     | 面积%     | 高度%     |
|----|--------|----------|--------|---------|---------|
| 1  | 9.991  | 6661087  | 330800 | 50.152  | 47.823  |
| 2  | 11.187 | 6620724  | 360916 | 49.848  | 52.177  |
| 总计 |        | 13281811 | 691716 | 100.000 | 100.000 |

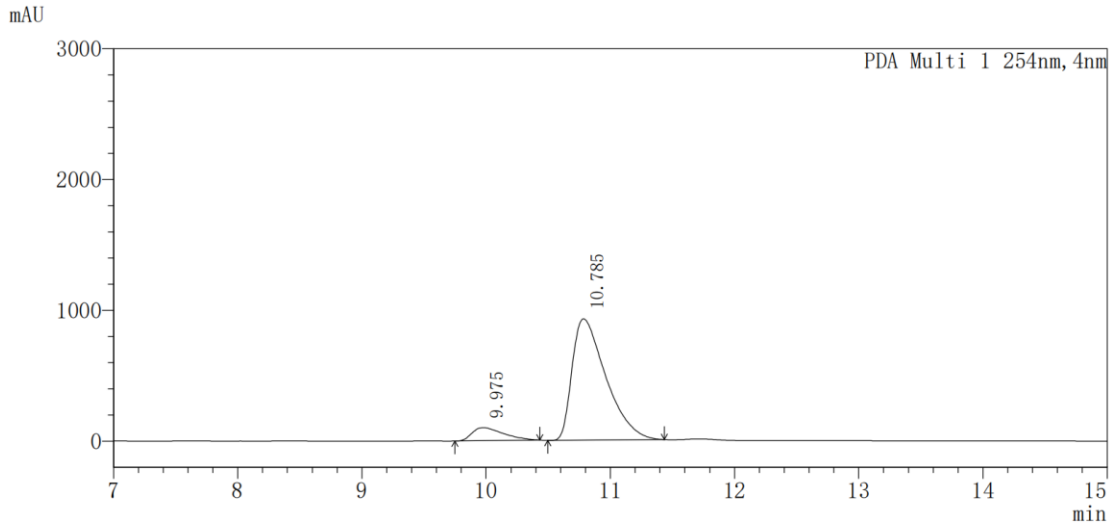

<峰表>

PDA Ch1 254nm

| 峰号 | 保留时间   | 面积       | 高度      | 面积%     | 高度%     |
|----|--------|----------|---------|---------|---------|
| 1  | 9.975  | 1755350  | 100187  | 9.083   | 9.732   |
| 2  | 10.785 | 17570567 | 929234  | 90.917  | 90.268  |
| 总计 |        | 19325917 | 1029421 | 100.000 | 100.000 |

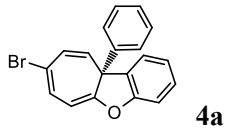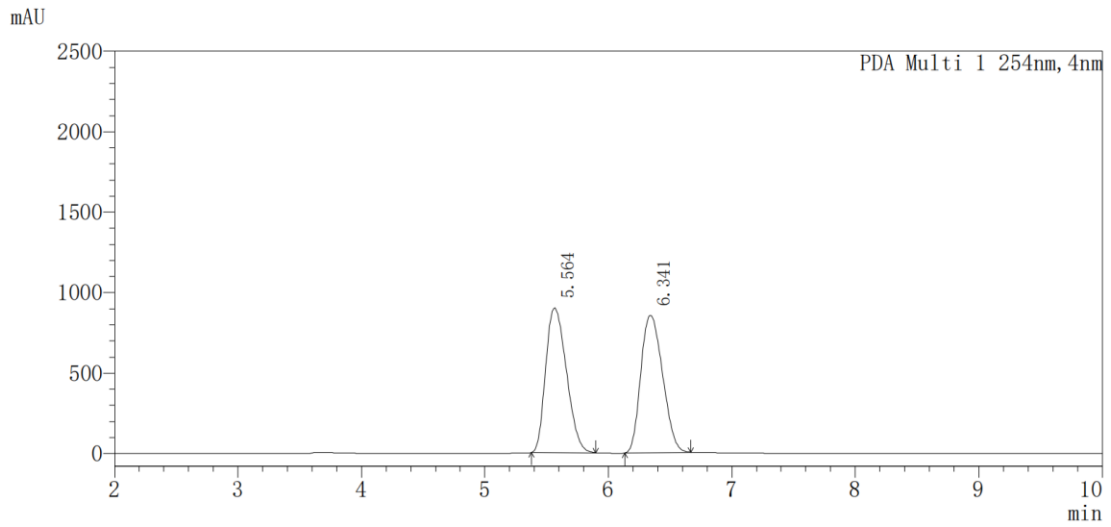

<峰表>

PDA Ch1 254nm

| 峰号 | 保留时间  | 面积       | 高度      | 化合物名     | 面积%     | 高度%     |
|----|-------|----------|---------|----------|---------|---------|
| 1  | 5.564 | 10520614 | 898587  | RT:5.564 | 50.065  | 51.274  |
| 2  | 6.341 | 10493203 | 853928  | RT:6.341 | 49.935  | 48.726  |
| 总计 |       | 21013817 | 1752515 |          | 100.000 | 100.000 |

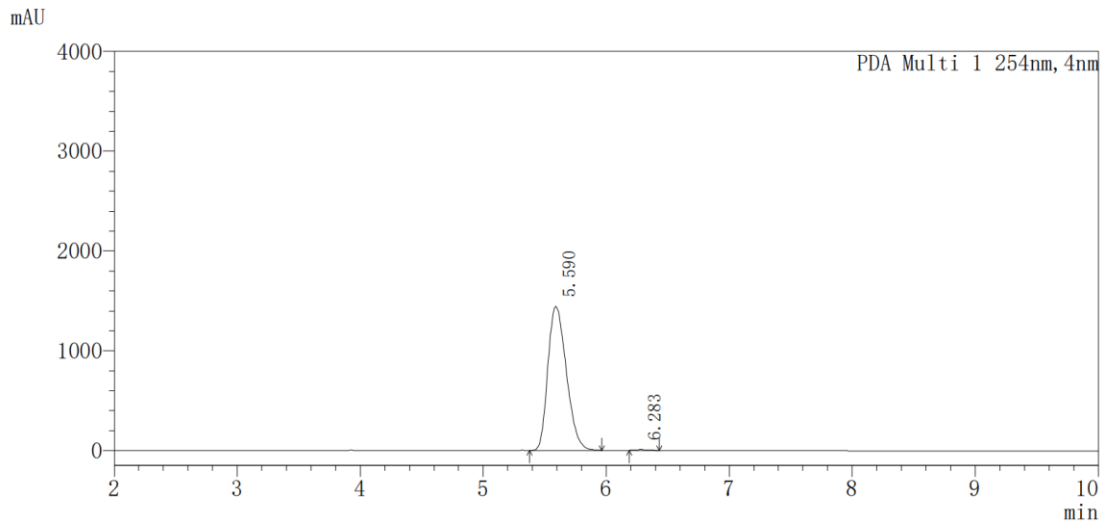

<峰表>

PDA Ch1 254nm

| 峰号 | 保留时间  | 面积       | 高度      | 化合物名 | 面积%     | 高度%     |
|----|-------|----------|---------|------|---------|---------|
| 1  | 5.590 | 15051313 | 1442522 |      | 99.684  | 99.573  |
| 2  | 6.283 | 47691    | 6188    |      | 0.316   | 0.427   |
| 总计 |       | 15099004 | 1448709 |      | 100.000 | 100.000 |

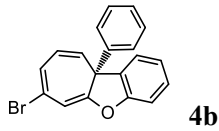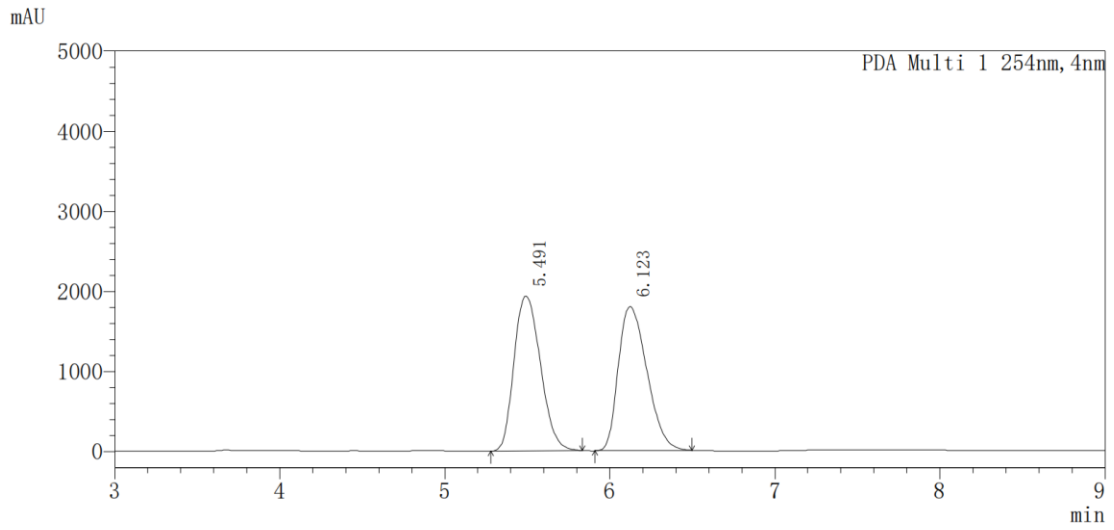

<峰表>

PDA Ch1 254nm

| 峰号 | 保留时间  | 面积       | 高度      | 化合物名 | 面积%     | 高度%     |
|----|-------|----------|---------|------|---------|---------|
| 1  | 5.491 | 21573911 | 1934085 |      | 49.859  | 51.843  |
| 2  | 6.123 | 21696110 | 1796598 |      | 50.141  | 48.157  |
| 总计 |       | 43270021 | 3730684 |      | 100.000 | 100.000 |

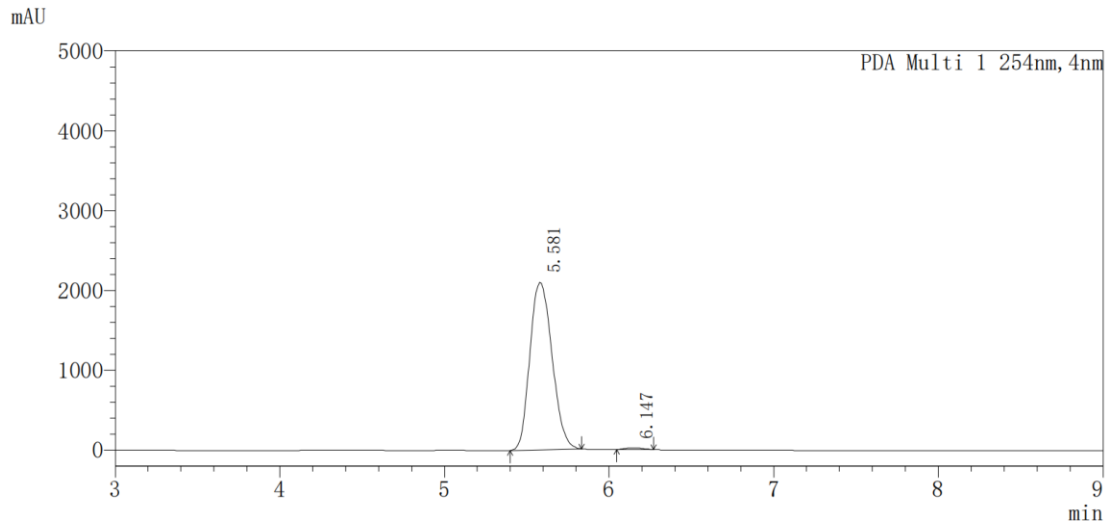

<峰表>

PDA Ch1 254nm

| 峰号 | 保留时间  | 面积       | 高度      | 化合物名 | 面积%     | 高度%     |
|----|-------|----------|---------|------|---------|---------|
| 1  | 5.581 | 19624092 | 2097919 |      | 99.149  | 98.861  |
| 2  | 6.147 | 168391   | 24178   |      | 0.851   | 1.139   |
| 总计 |       | 19792483 | 2122096 |      | 100.000 | 100.000 |

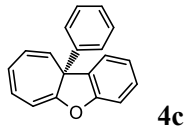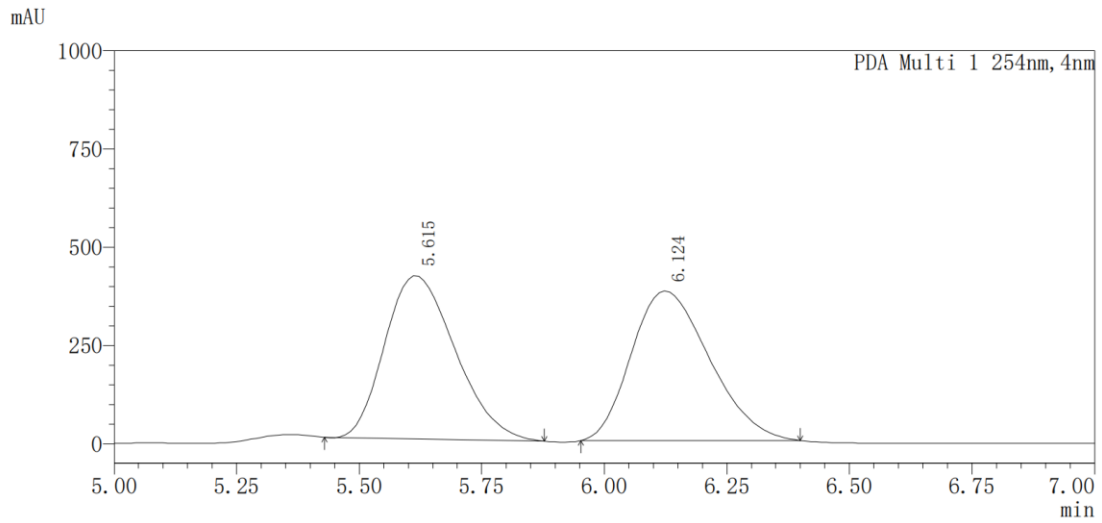

<峰表>

PDA Ch1 254nm

| 峰号 | 保留时间  | 面积      | 标记 | 化合物名 | 面积%     |
|----|-------|---------|----|------|---------|
| 1  | 5.615 | 4157142 | M  |      | 49.616  |
| 2  | 6.124 | 4221538 | M  |      | 50.384  |
| 总计 |       | 8378680 |    |      | 100.000 |

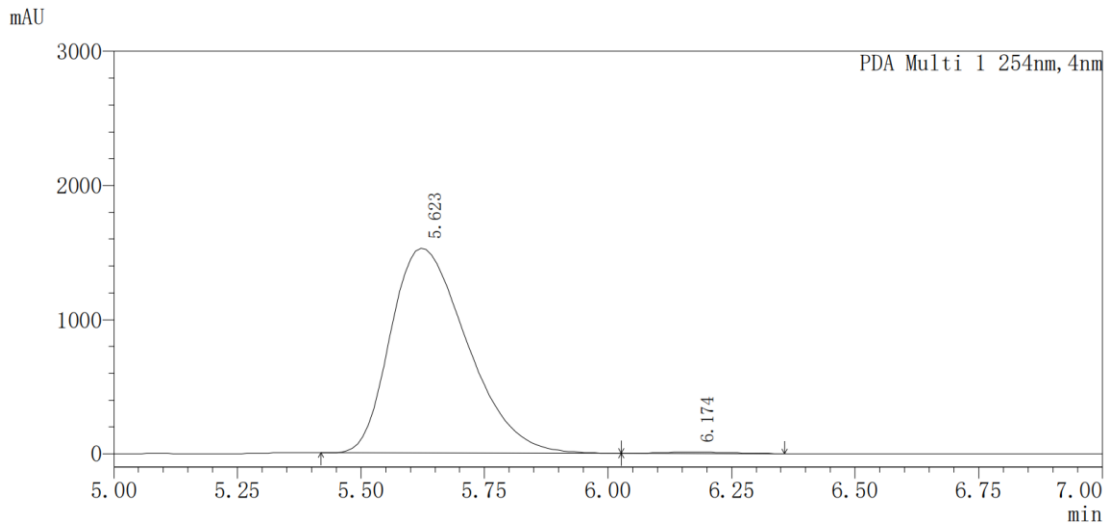

<峰表>

PDA Ch1 254nm

| 峰号 | 保留时间  | 面积       | 标记 | 化合物名 | 面积%     |
|----|-------|----------|----|------|---------|
| 1  | 5.623 | 16426522 | M  |      | 99.485  |
| 2  | 6.174 | 85063    | M  |      | 0.515   |
| 总计 |       | 16511585 |    |      | 100.000 |

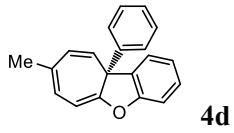

mAU

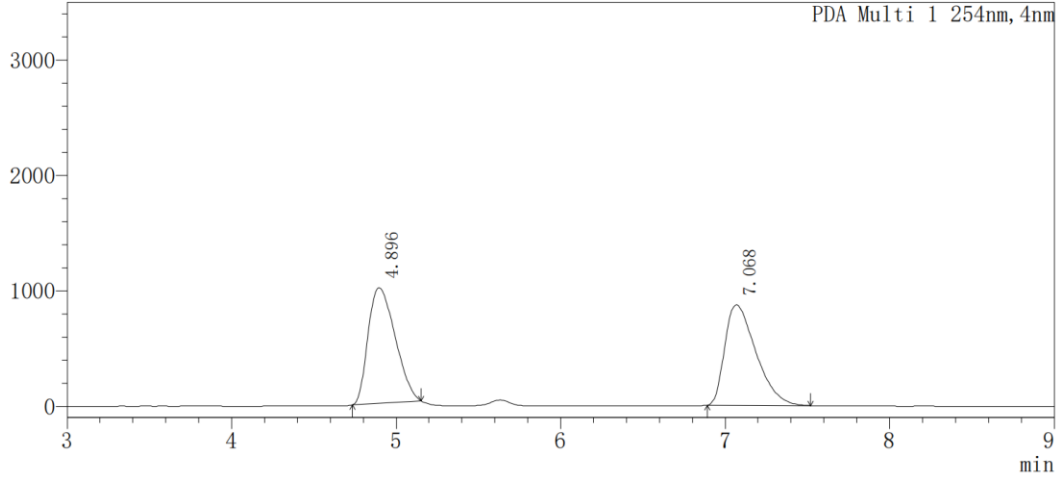

<峰表>

PDA Ch1 254nm

| 峰号 | 保留时间  | 面积       | 高度      | 化合物名 | 面积%     | 高度%     |
|----|-------|----------|---------|------|---------|---------|
| 1  | 4.896 | 11468549 | 1001384 |      | 49.982  | 53.482  |
| 2  | 7.068 | 11477026 | 870982  |      | 50.018  | 46.518  |
| 总计 |       | 22945575 | 1872367 |      | 100.000 | 100.000 |

mAU

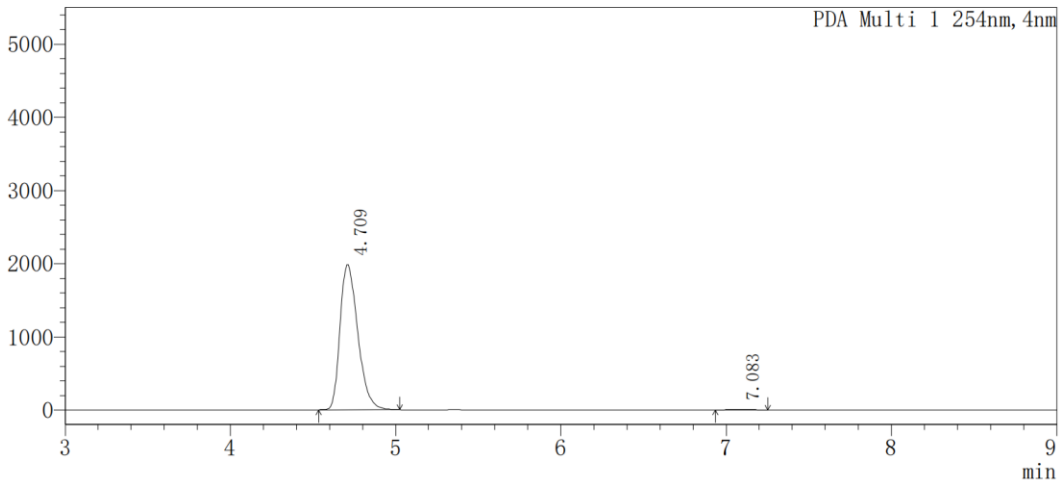

<峰表>

PDA Ch1 254nm

| 峰号 | 保留时间  | 面积       | 高度      | 化合物名 | 面积%     | 高度%     |
|----|-------|----------|---------|------|---------|---------|
| 1  | 4.709 | 14833266 | 1981040 |      | 99.569  | 99.692  |
| 2  | 7.083 | 64144    | 6115    |      | 0.431   | 0.308   |
| 总计 |       | 14897409 | 1987155 |      | 100.000 | 100.000 |

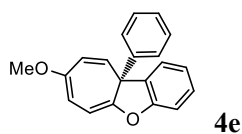

mAU

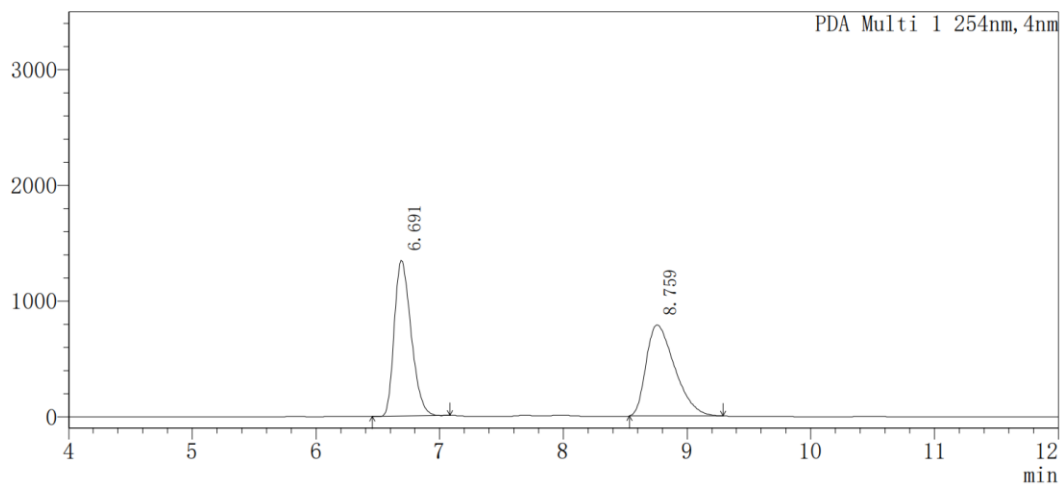

<峰表>

PDA Ch1 254nm

| 峰号 | 保留时间  | 面积       | 高度      | 化合物名 | 面积%     | 高度%     |
|----|-------|----------|---------|------|---------|---------|
| 1  | 6.691 | 12785057 | 1345697 |      | 50.258  | 63.137  |
| 2  | 8.759 | 12653596 | 785683  |      | 49.742  | 36.863  |
| 总计 |       | 25438653 | 2131380 |      | 100.000 | 100.000 |

mAU

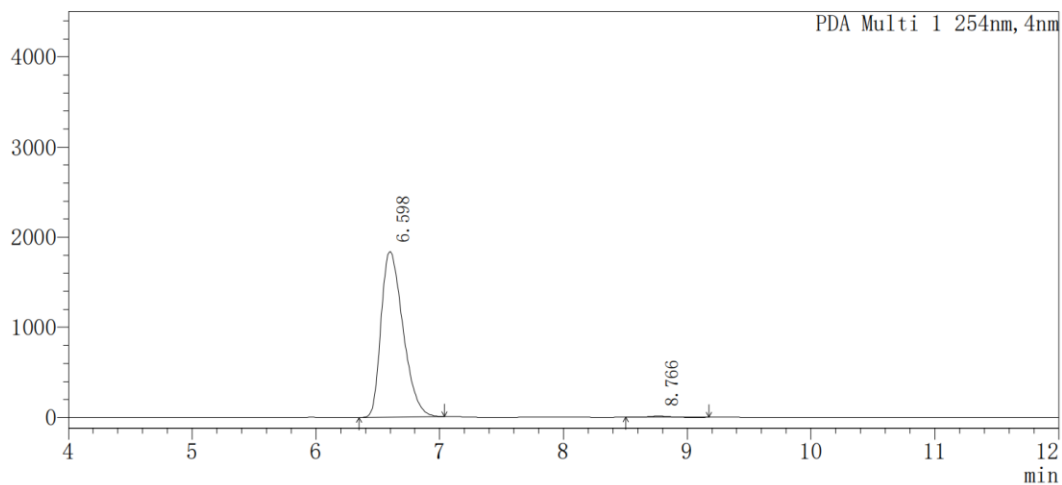

<峰表>

PDA Ch1 254nm

| 峰号 | 保留时间  | 面积       | 高度      | 化合物名 | 面积%     | 高度%     |
|----|-------|----------|---------|------|---------|---------|
| 1  | 6.598 | 22613097 | 1833895 |      | 99.510  | 99.313  |
| 2  | 8.766 | 111298   | 12681   |      | 0.490   | 0.687   |
| 总计 |       | 22724396 | 1846576 |      | 100.000 | 100.000 |

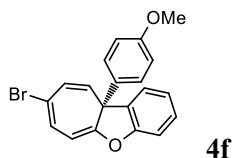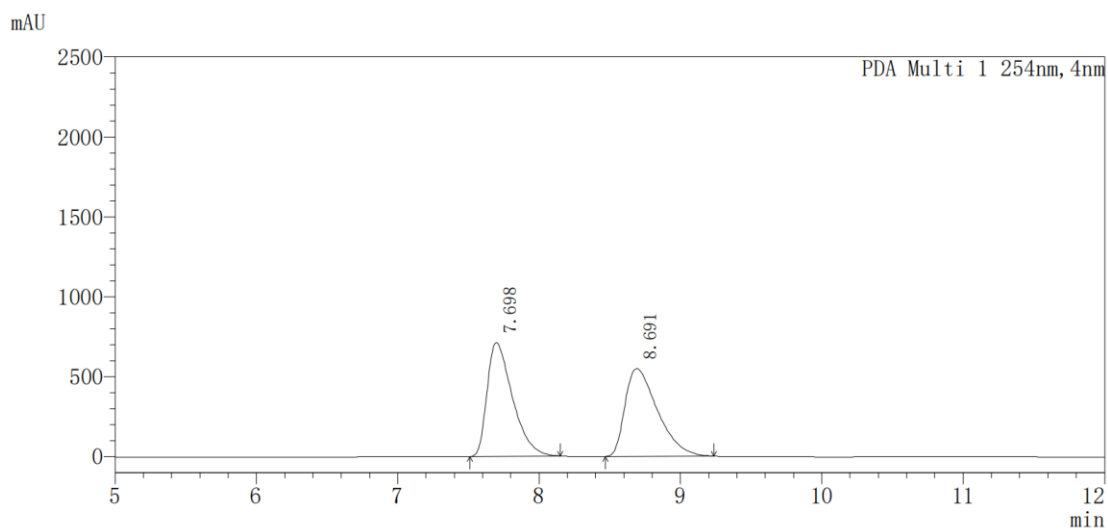

<峰表>

PDA Ch1 254nm

| 峰号 | 保留时间  | 面积       | 高度      | 化合物名 | 面积%     | 高度%     |
|----|-------|----------|---------|------|---------|---------|
| 1  | 7.698 | 8892840  | 710953  |      | 50.268  | 56.423  |
| 2  | 8.691 | 8798034  | 549081  |      | 49.732  | 43.577  |
| 总计 |       | 17690874 | 1260034 |      | 100.000 | 100.000 |

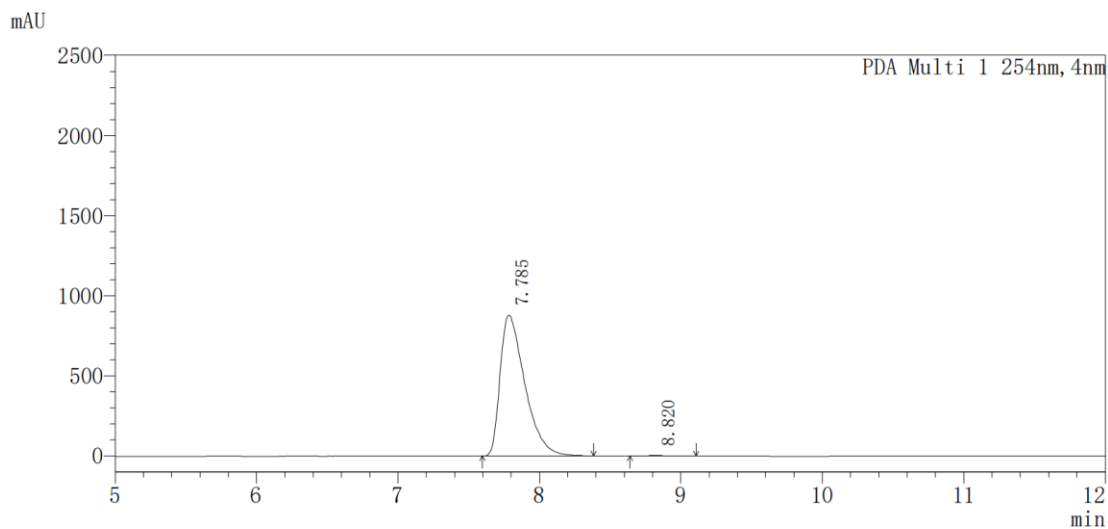

<峰表>

PDA Ch1 254nm

| 峰号 | 保留时间  | 面积       | 高度     | 化合物名 | 面积%     | 高度%     |
|----|-------|----------|--------|------|---------|---------|
| 1  | 7.785 | 10643986 | 878591 |      | 99.622  | 99.643  |
| 2  | 8.820 | 40379    | 3146   |      | 0.378   | 0.357   |
| 总计 |       | 10684365 | 881737 |      | 100.000 | 100.000 |

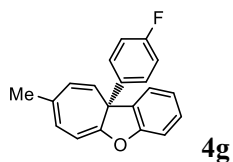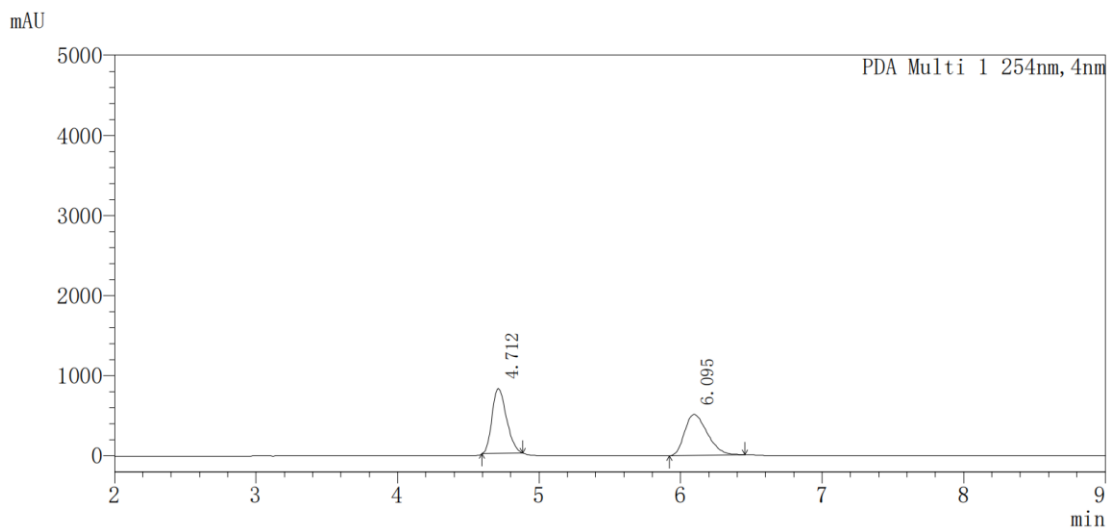

<峰表>

PDA Ch1 254nm

| 峰号 | 保留时间  | 面积       | 高度      | 化合物名 | 面积%     | 高度%     |
|----|-------|----------|---------|------|---------|---------|
| 1  | 4.712 | 5736005  | 813774  |      | 50.362  | 61.480  |
| 2  | 6.095 | 5653642  | 509862  |      | 49.638  | 38.520  |
| 总计 |       | 11389647 | 1323636 |      | 100.000 | 100.000 |

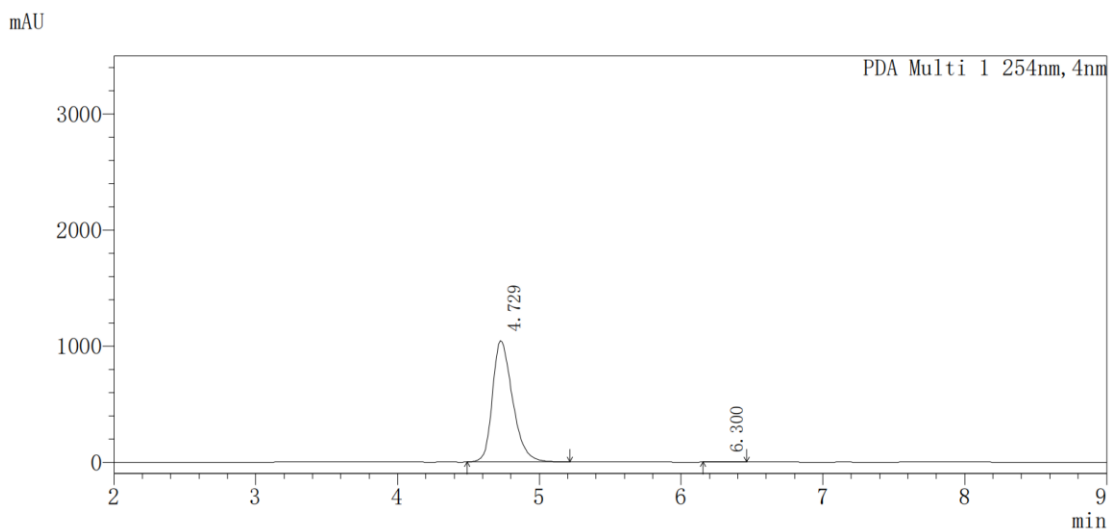

<峰表>

PDA Ch1 254nm

| 峰号 | 保留时间  | 面积       | 高度      | 化合物名 | 面积%     | 高度%     |
|----|-------|----------|---------|------|---------|---------|
| 1  | 4.729 | 10286591 | 1043973 |      | 99.755  | 99.752  |
| 2  | 6.300 | 25281    | 2598    |      | 0.245   | 0.248   |
| 总计 |       | 10311871 | 1046571 |      | 100.000 | 100.000 |



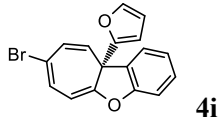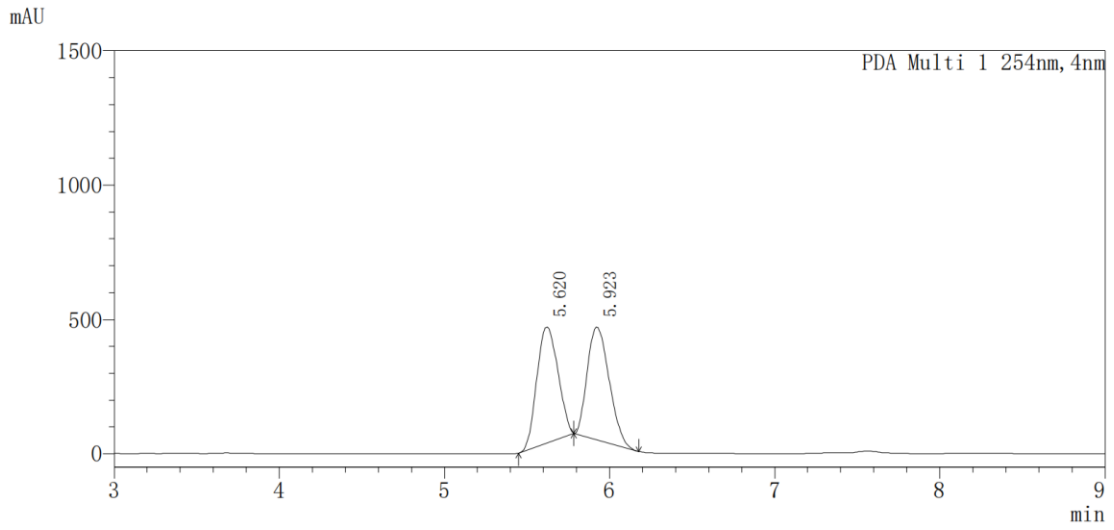

<峰表>

PDA Ch1 254nm

| 峰号 | 保留时间  | 面积      | 高度     | 化合物名 | 面积%     | 高度%     |
|----|-------|---------|--------|------|---------|---------|
| 1  | 5.620 | 3841098 | 431512 |      | 49.932  | 50.635  |
| 2  | 5.923 | 3851526 | 420687 |      | 50.068  | 49.365  |
| 总计 |       | 7692623 | 852199 |      | 100.000 | 100.000 |

mAU

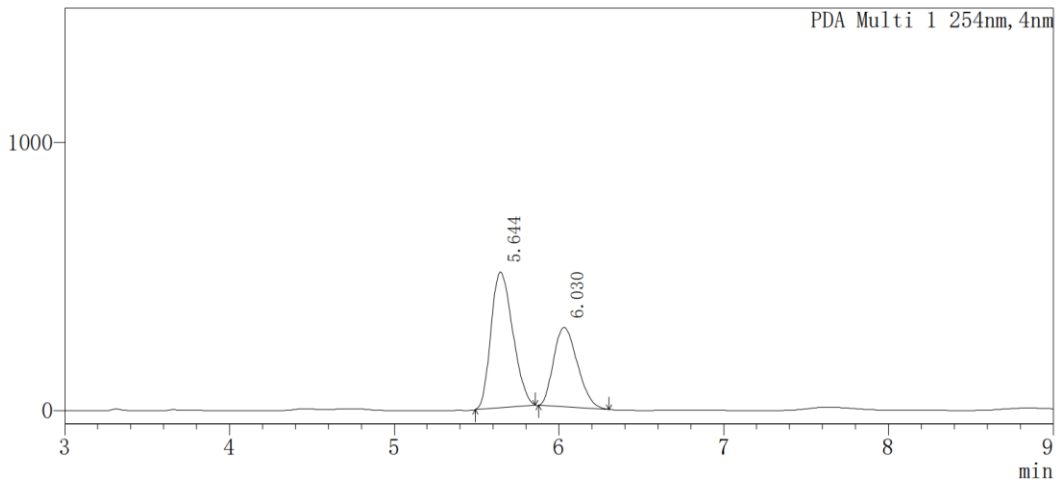

<峰表>

PDA Ch1 254nm

| 峰号 | 保留时间  | 面积      | 高度     | 化合物名 | 面积%     | 高度%     |
|----|-------|---------|--------|------|---------|---------|
| 1  | 5.644 | 4638783 | 506053 |      | 60.924  | 63.073  |
| 2  | 6.030 | 2975238 | 296270 |      | 39.076  | 36.927  |
| 总计 |       | 7614021 | 802324 |      | 100.000 | 100.000 |

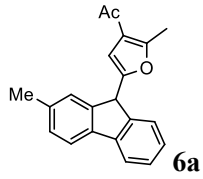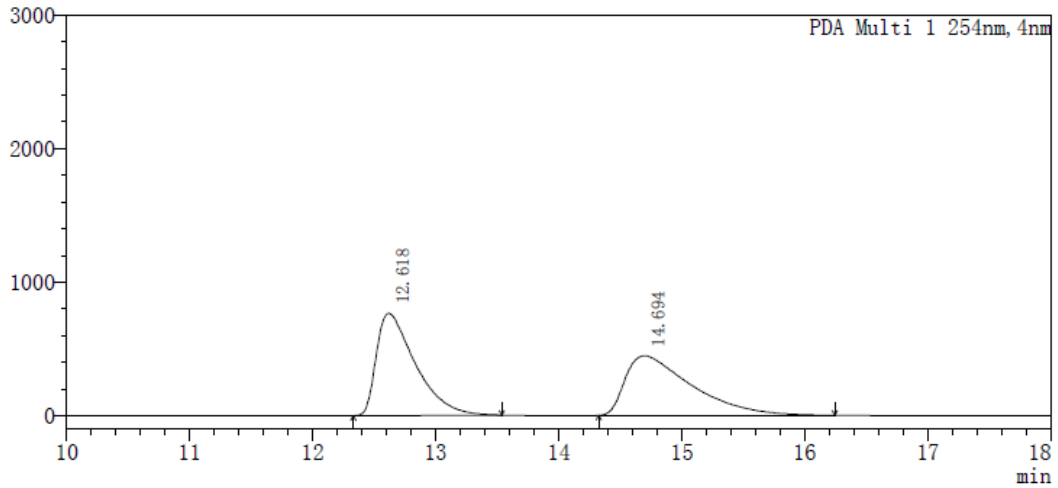

<峰表>

PDA Ch1 254nm

| 峰号 | 保留时间   | 面积       | 高度      | 化合物名 | 面积%     | 高度%     |
|----|--------|----------|---------|------|---------|---------|
| 1  | 12.618 | 16846981 | 764471  |      | 50.237  | 63.161  |
| 2  | 14.694 | 16688124 | 445879  |      | 49.763  | 36.839  |
| 总计 |        | 33535104 | 1210350 |      | 100.000 | 100.000 |

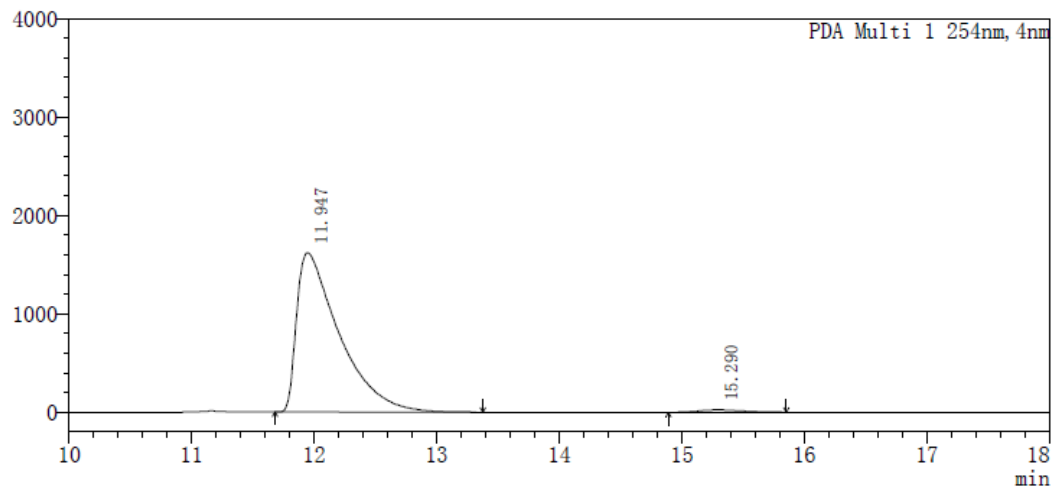

<峰表>

PDA Ch1 254nm

| 峰号 | 保留时间   | 面积       | 高度      | 化合物名 | 面积%     | 高度%     |
|----|--------|----------|---------|------|---------|---------|
| 1  | 11.947 | 39167726 | 1620756 |      | 98.477  | 98.509  |
| 2  | 15.290 | 605673   | 24531   |      | 1.523   | 1.491   |
| 总计 |        | 39773399 | 1645286 |      | 100.000 | 100.000 |

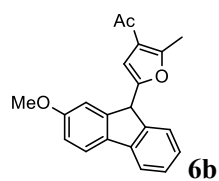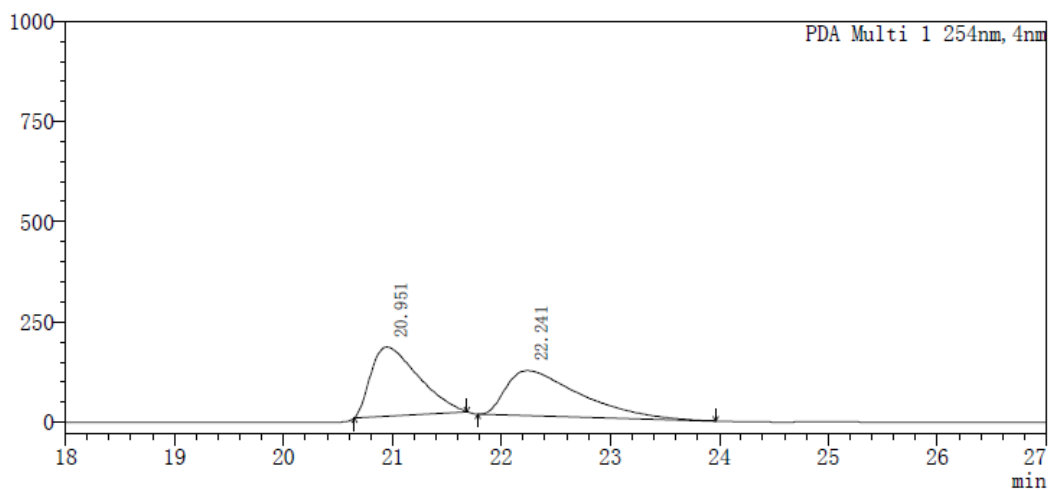

<峰表>

PDA Ch1 254nm

| 峰号 | 保留时间   | 面积       | 高度     | 化合物名 | 面积%     | 高度%     |
|----|--------|----------|--------|------|---------|---------|
| 1  | 20.951 | 5223228  | 172092 |      | 49.677  | 60.506  |
| 2  | 22.241 | 5291161  | 112329 |      | 50.323  | 39.494  |
| 总计 |        | 10514389 | 284421 |      | 100.000 | 100.000 |

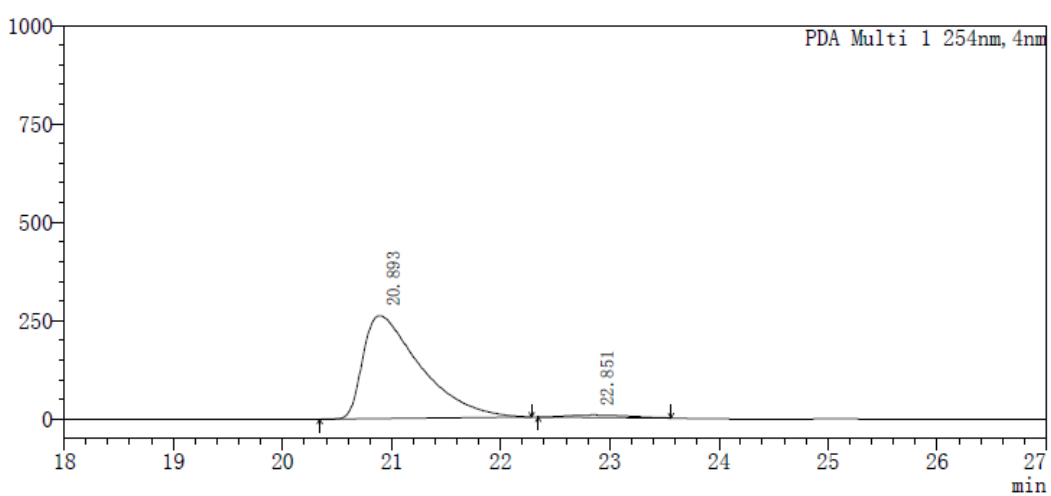

<峰表>

PDA Ch1 254nm

| 峰号 | 保留时间   | 面积      | 高度     | 化合物名 | 面积%     | 高度%     |
|----|--------|---------|--------|------|---------|---------|
| 1  | 20.893 | 9608376 | 261690 |      | 97.593  | 97.738  |
| 2  | 22.851 | 237018  | 6057   |      | 2.407   | 2.262   |
| 总计 |        | 9845393 | 267748 |      | 100.000 | 100.000 |

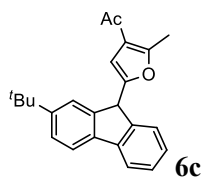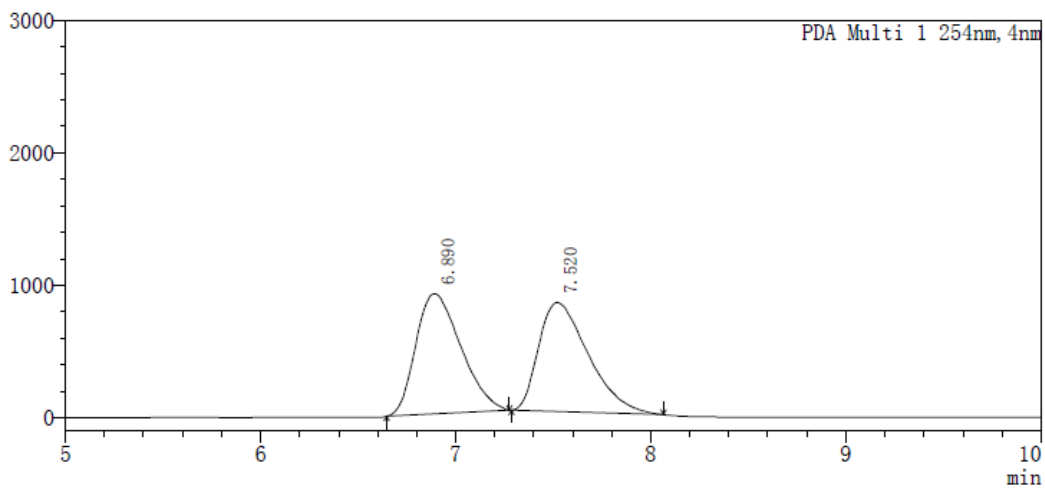

<峰表>

PDA Ch1 254nm

| 峰号 | 保留时间  | 面积       | 高度      | 化合物名 | 面积%     | 高度%     |
|----|-------|----------|---------|------|---------|---------|
| 1  | 6.890 | 14551899 | 907034  |      | 50.010  | 52.485  |
| 2  | 7.520 | 14546075 | 821145  |      | 49.990  | 47.515  |
| 总计 |       | 29097973 | 1728178 |      | 100.000 | 100.000 |

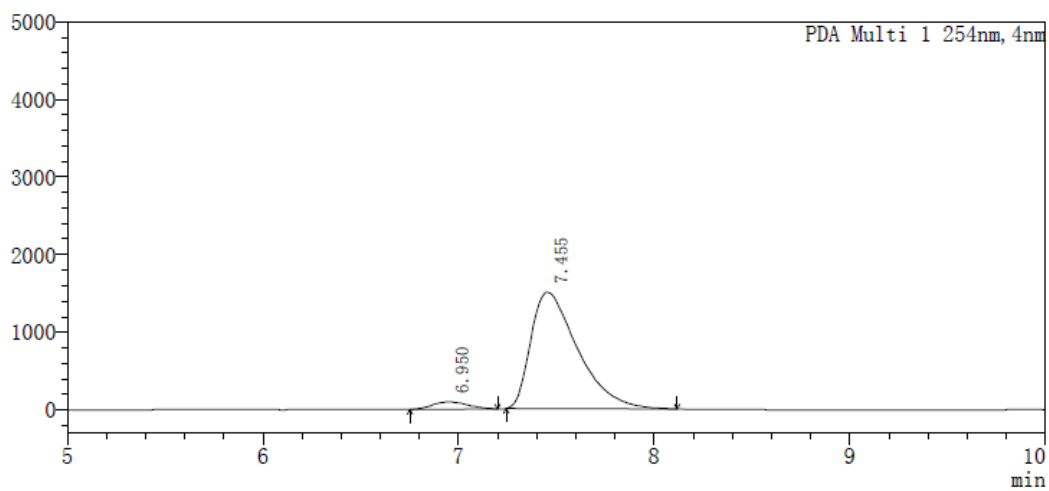

<峰表>

PDA Ch1 254nm

| 峰号 | 保留时间  | 面积       | 高度      | 化合物名 | 面积%     | 高度%     |
|----|-------|----------|---------|------|---------|---------|
| 1  | 6.950 | 1204013  | 94488   |      | 4.578   | 5.923   |
| 2  | 7.455 | 25098842 | 1500726 |      | 95.422  | 94.077  |
| 总计 |       | 26302855 | 1595214 |      | 100.000 | 100.000 |

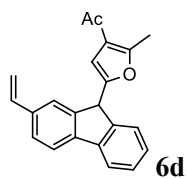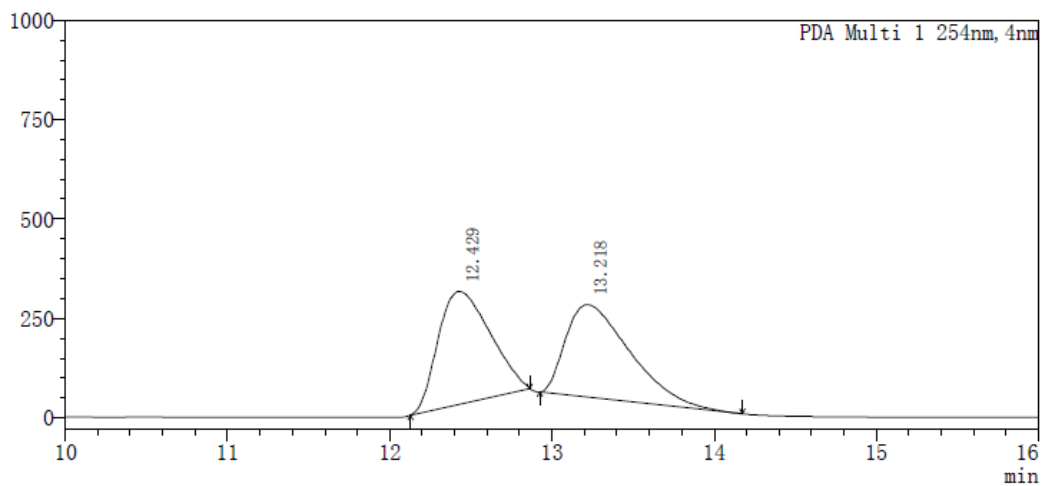

<峰表>

PDA Ch1 254nm

| 峰号 | 保留时间   | 面积       | 高度     | 化合物名 | 面积%     | 高度%     |
|----|--------|----------|--------|------|---------|---------|
| 1  | 12.429 | 6334331  | 283978 |      | 49.658  | 54.951  |
| 2  | 13.218 | 6421708  | 232807 |      | 50.342  | 45.049  |
| 总计 |        | 12756039 | 516785 |      | 100.000 | 100.000 |

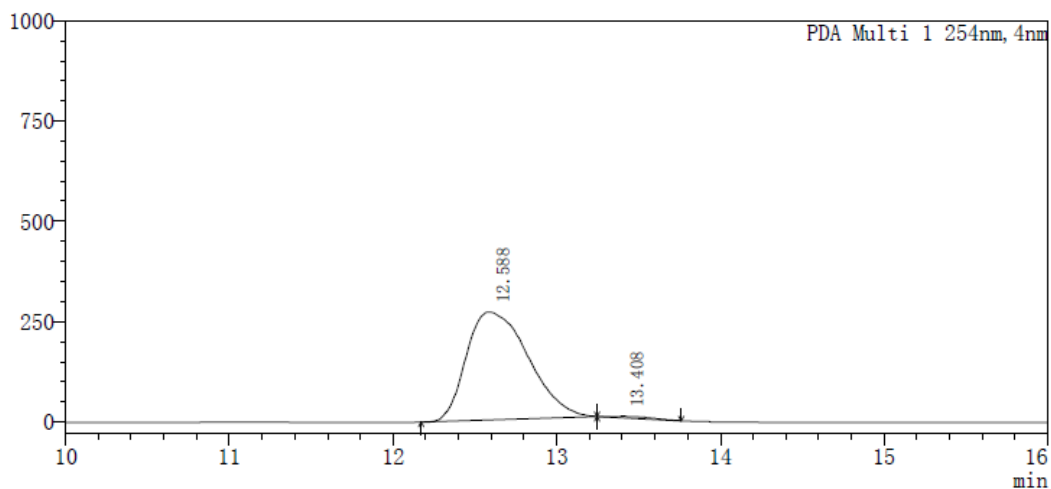

<峰表>

PDA Ch1 254nm

| 峰号 | 保留时间   | 面积      | 高度     | 化合物名 | 面积%     | 高度%     |
|----|--------|---------|--------|------|---------|---------|
| 1  | 12.588 | 7076919 | 269331 |      | 99.087  | 98.628  |
| 2  | 13.408 | 65209   | 3746   |      | 0.913   | 1.372   |
| 总计 |        | 7142128 | 273077 |      | 100.000 | 100.000 |

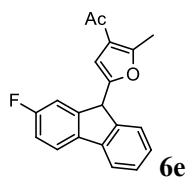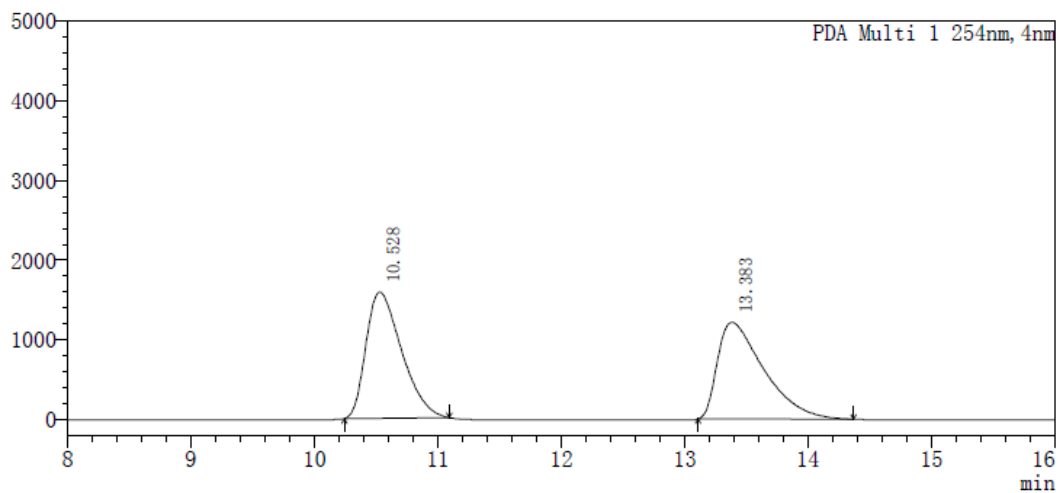

<峰表>

PDA Ch1 254nm

| 峰号 | 保留时间   | 面积       | 高度      | 化合物名 | 面积%     | 高度%     |
|----|--------|----------|---------|------|---------|---------|
| 1  | 10.528 | 31742770 | 1581265 |      | 50.044  | 56.607  |
| 2  | 13.383 | 31687064 | 1212156 |      | 49.956  | 43.393  |
| 总计 |        | 63429834 | 2793420 |      | 100.000 | 100.000 |

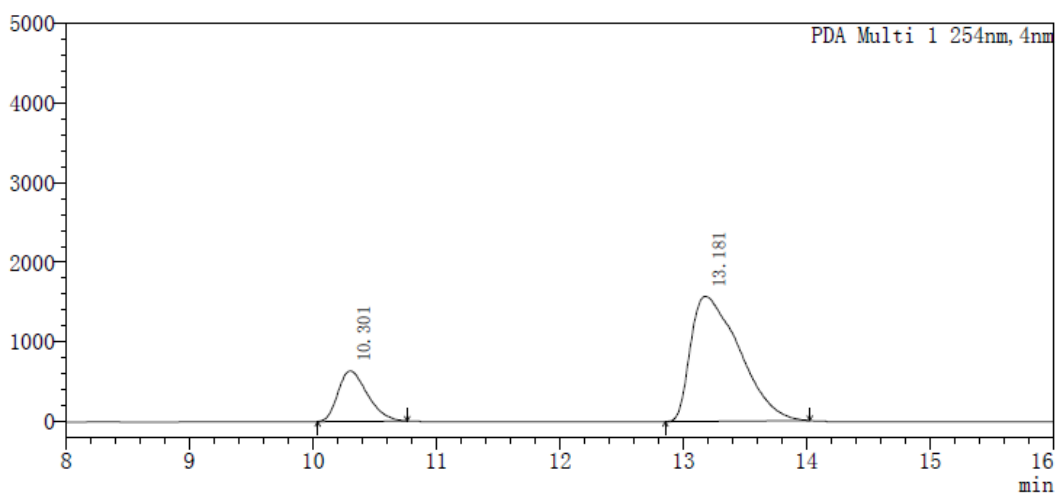

<峰表>

PDA Ch1 254nm

| 峰号 | 保留时间   | 面积       | 高度      | 化合物名 | 面积%     | 高度%     |
|----|--------|----------|---------|------|---------|---------|
| 1  | 10.301 | 10437922 | 631541  |      | 19.467  | 28.714  |
| 2  | 13.181 | 43181893 | 1567886 |      | 80.533  | 71.286  |
| 总计 |        | 53619815 | 2199427 |      | 100.000 | 100.000 |

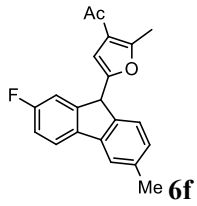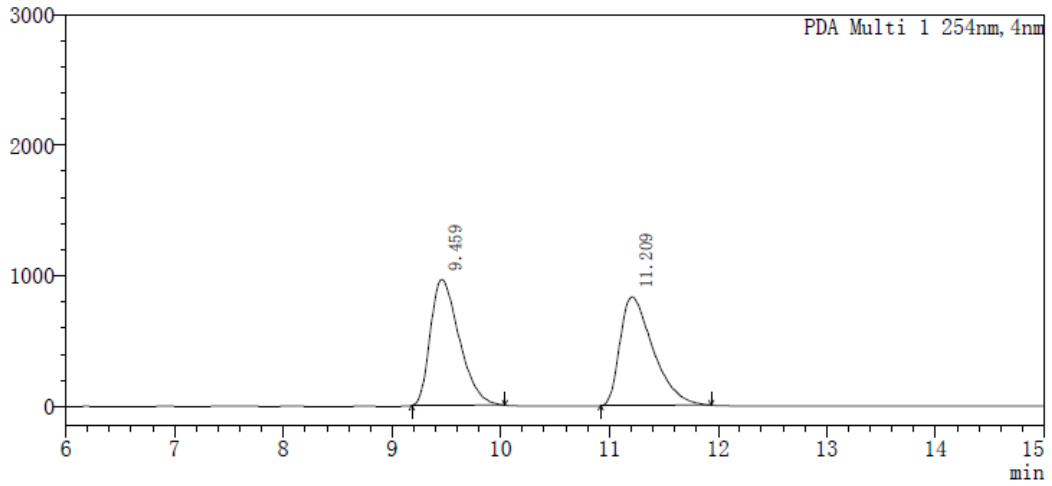

<峰表>

PDA Ch1 254nm

| 峰号 | 保留时间   | 面积       | 高度      | 化合物名 | 面积%     | 高度%     |
|----|--------|----------|---------|------|---------|---------|
| 1  | 9.459  | 17783809 | 962660  |      | 50.246  | 53.653  |
| 2  | 11.209 | 17609946 | 831572  |      | 49.754  | 46.347  |
| 总计 |        | 35393755 | 1794232 |      | 100.000 | 100.000 |

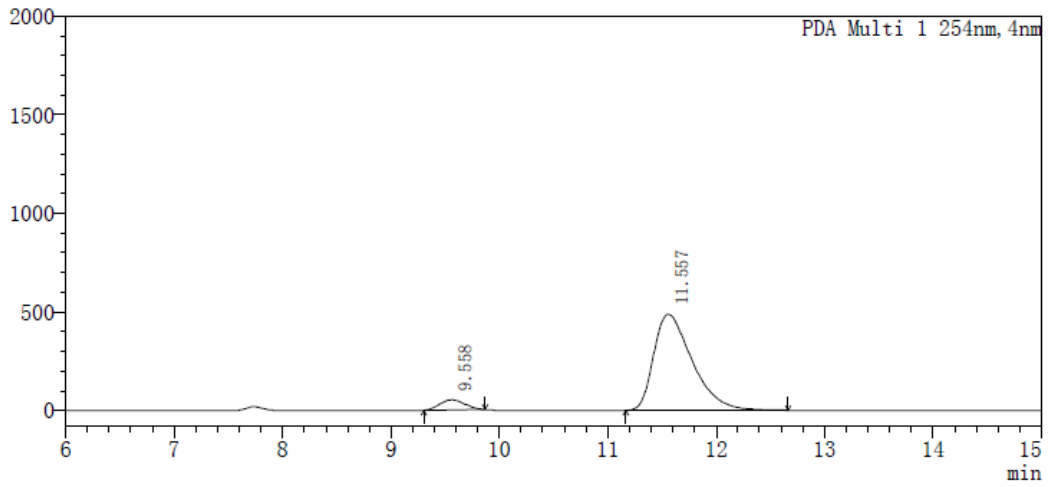

<峰表>

PDA Ch1 254nm

| 峰号 | 保留时间   | 面积       | 高度     | 化合物名 | 面积%     | 高度%     |
|----|--------|----------|--------|------|---------|---------|
| 1  | 9.558  | 829074   | 51369  |      | 6.449   | 9.547   |
| 2  | 11.557 | 12026722 | 486719 |      | 93.551  | 90.453  |
| 总计 |        | 12855795 | 538087 |      | 100.000 | 100.000 |

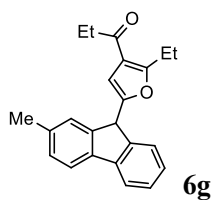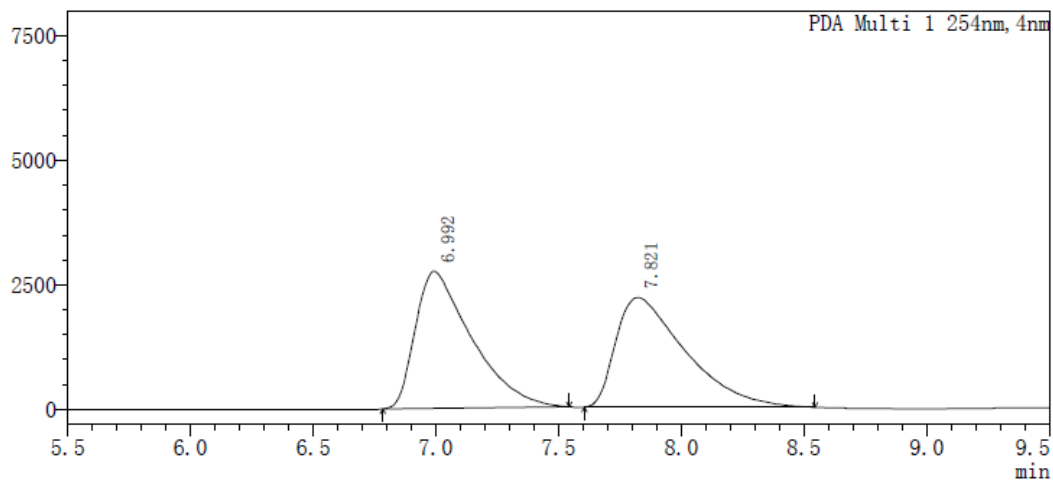

<峰表>

PDA Ch1 254nm

| 峰号 | 保留时间  | 面积       | 高度      | 化合物名 | 面积%     | 高度%     |
|----|-------|----------|---------|------|---------|---------|
| 1  | 6.992 | 43896140 | 2747402 |      | 50.359  | 55.533  |
| 2  | 7.821 | 43269678 | 2199947 |      | 49.641  | 44.467  |
| 总计 |       | 87165818 | 4947349 |      | 100.000 | 100.000 |

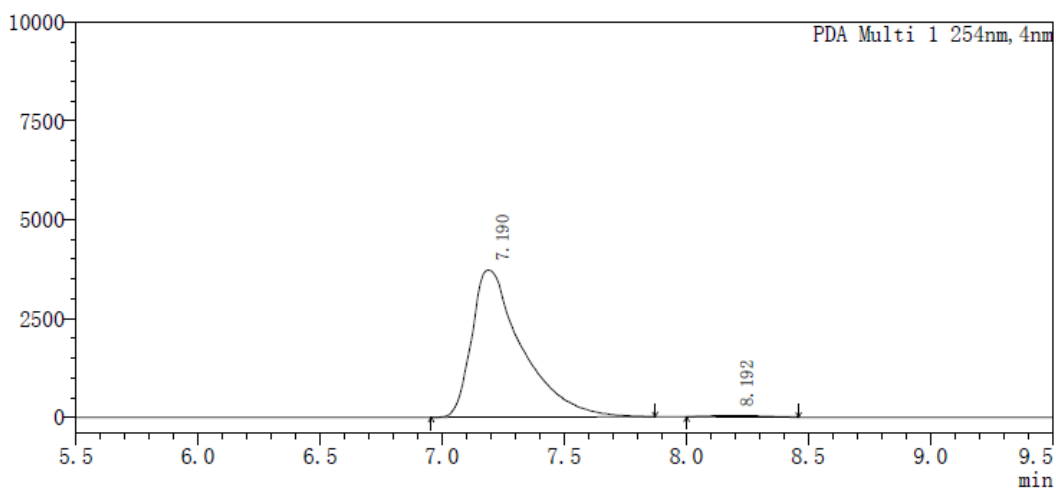

<峰表>

PDA Ch1 254nm

| 峰号 | 保留时间  | 面积       | 高度      | 化合物名 | 面积%     | 高度%     |
|----|-------|----------|---------|------|---------|---------|
| 1  | 7.190 | 53384828 | 3719318 |      | 98.984  | 99.020  |
| 2  | 8.192 | 548113   | 36809   |      | 1.016   | 0.980   |
| 总计 |       | 53932941 | 3756126 |      | 100.000 | 100.000 |



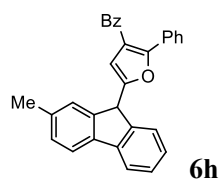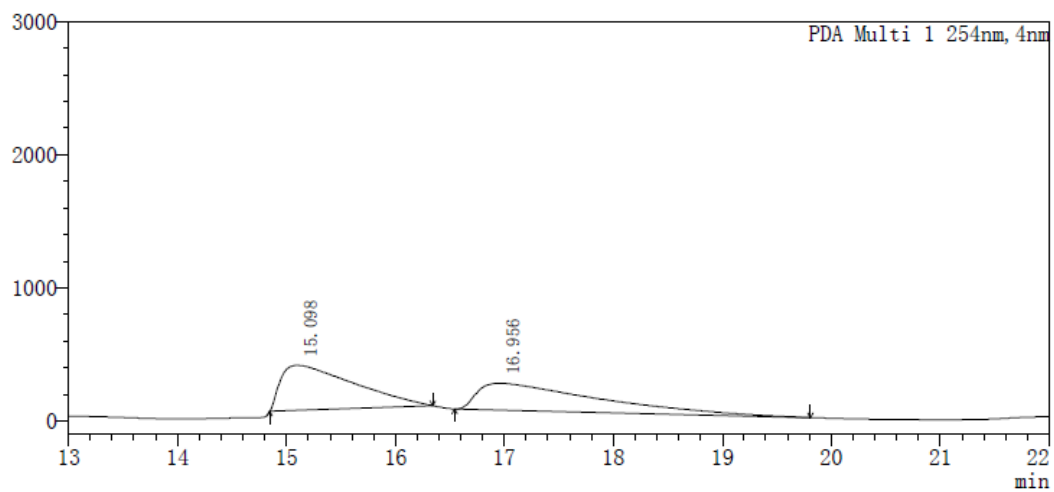

<峰表>

PDA Ch1 254nm

| 峰号 | 保留时间   | 面积       | 高度     | 化合物名 | 面积%     | 高度%     |
|----|--------|----------|--------|------|---------|---------|
| 1  | 15.098 | 15795906 | 338740 |      | 50.387  | 62.702  |
| 2  | 16.956 | 15553312 | 201495 |      | 49.613  | 37.298  |
| 总计 |        | 31349217 | 540235 |      | 100.000 | 100.000 |

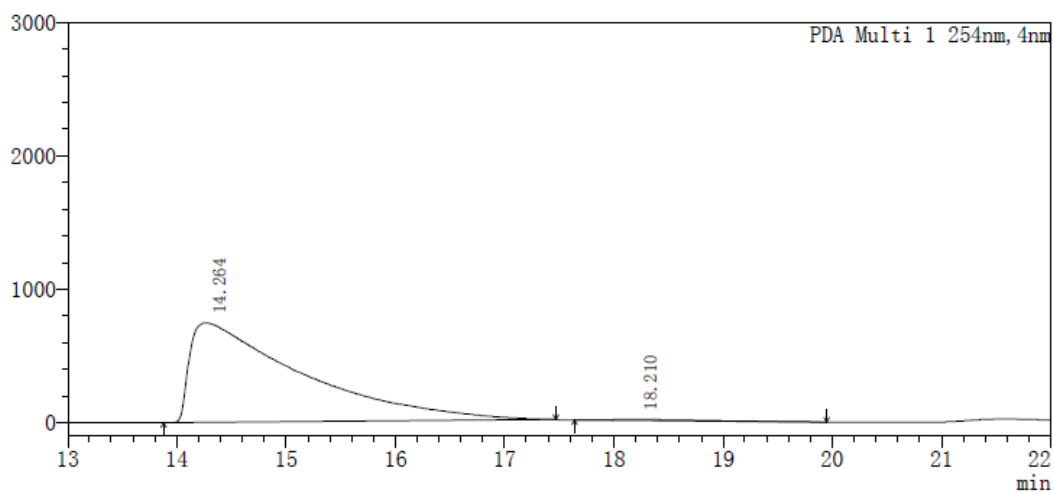

<峰表>

PDA Ch1 254nm

| 峰号 | 保留时间   | 面积       | 高度     | 化合物名 | 面积%     | 高度%     |
|----|--------|----------|--------|------|---------|---------|
| 1  | 14.264 | 52822874 | 743697 |      | 99.194  | 99.090  |
| 2  | 18.210 | 428964   | 6829   |      | 0.806   | 0.910   |
| 总计 |        | 53251837 | 750526 |      | 100.000 | 100.000 |

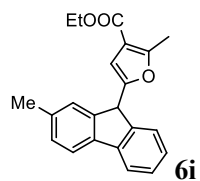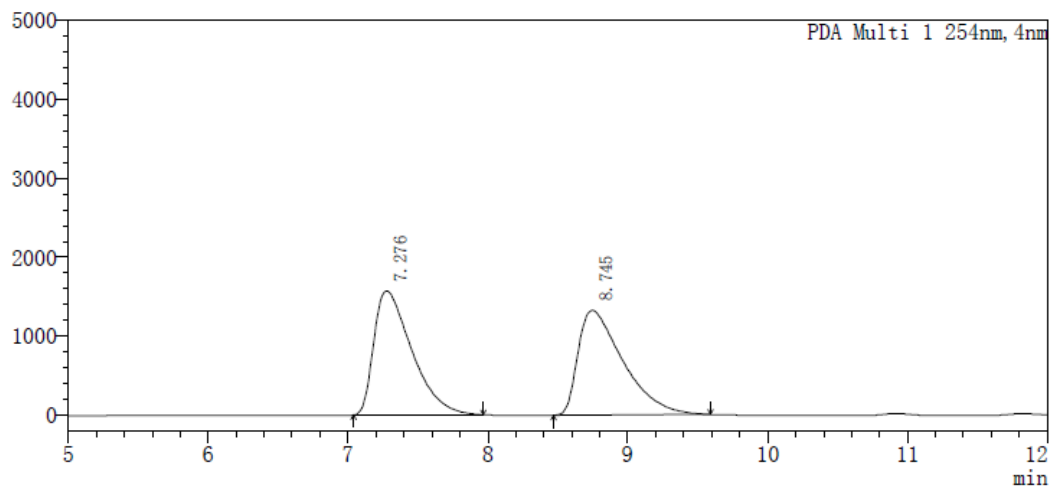

<峰表>

PDA Ch1 254nm

| 峰号 | 保留时间  | 面积       | 高度      | 化合物名 | 面积%     | 高度%     |
|----|-------|----------|---------|------|---------|---------|
| 1  | 7.276 | 29607740 | 1568146 |      | 50.005  | 54.255  |
| 2  | 8.745 | 29601968 | 1322159 |      | 49.995  | 45.745  |
| 总计 |       | 59209708 | 2890305 |      | 100.000 | 100.000 |

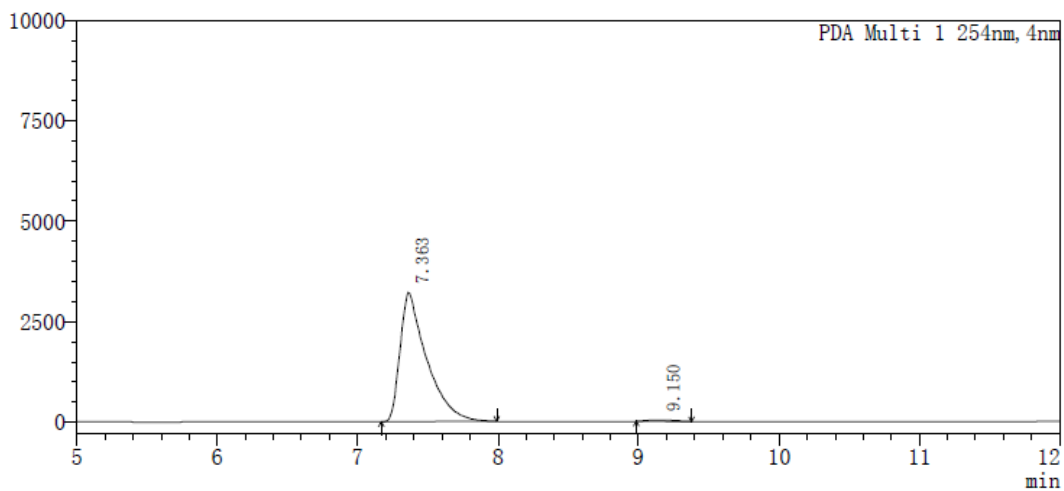

<峰表>

PDA Ch1 254nm

| 峰号 | 保留时间  | 面积       | 高度      | 化合物名 | 面积%     | 高度%     |
|----|-------|----------|---------|------|---------|---------|
| 1  | 7.363 | 42428434 | 3219757 |      | 98.855  | 98.865  |
| 2  | 9.150 | 491315   | 36965   |      | 1.145   | 1.135   |
| 总计 |       | 42919750 | 3256722 |      | 100.000 | 100.000 |

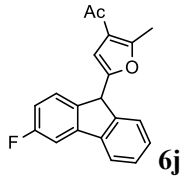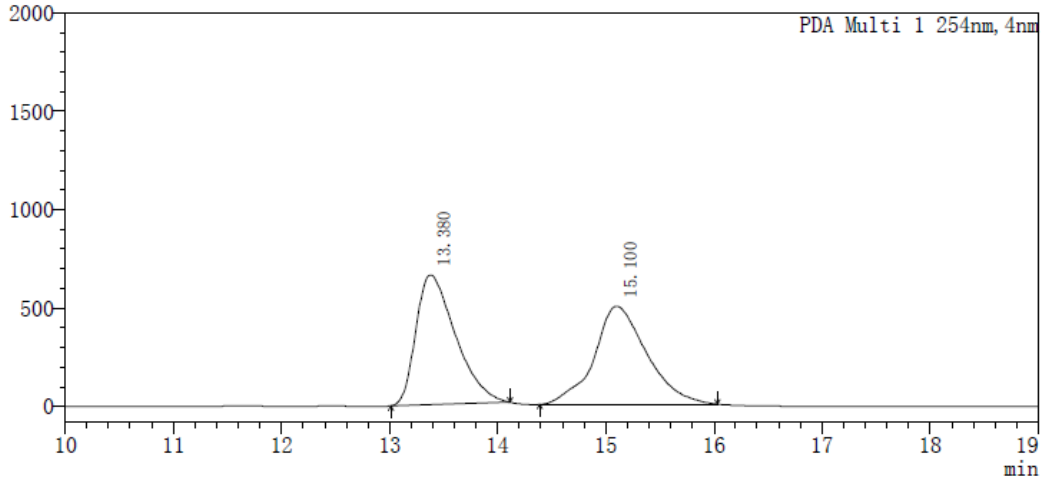

<峰表>

PDA Ch1 254nm

| 峰号 | 保留时间   | 面积       | 高度      | 化合物名 | 面积%     | 高度%     |
|----|--------|----------|---------|------|---------|---------|
| 1  | 13.380 | 16773609 | 657593  |      | 49.856  | 56.948  |
| 2  | 15.100 | 16870375 | 497137  |      | 50.144  | 43.052  |
| 总计 |        | 33643984 | 1154730 |      | 100.000 | 100.000 |

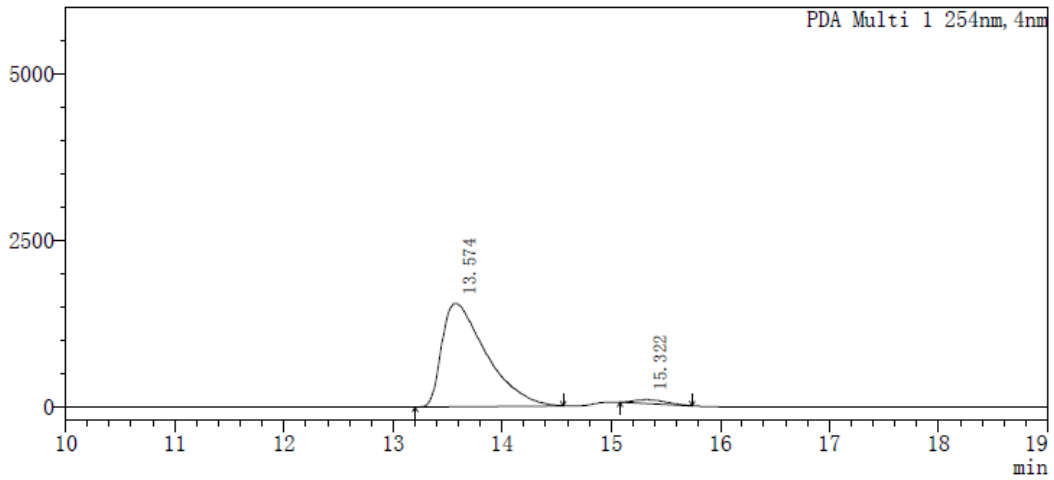

<峰表>

PDA Ch1 254nm

| 峰号 | 保留时间   | 面积       | 高度      | 化合物名 | 面积%     | 高度%     |
|----|--------|----------|---------|------|---------|---------|
| 1  | 13.574 | 43730114 | 1549584 |      | 97.452  | 96.447  |
| 2  | 15.322 | 1143154  | 57081   |      | 2.548   | 3.553   |
| 总计 |        | 44873268 | 1606665 |      | 100.000 | 100.000 |

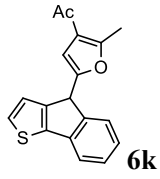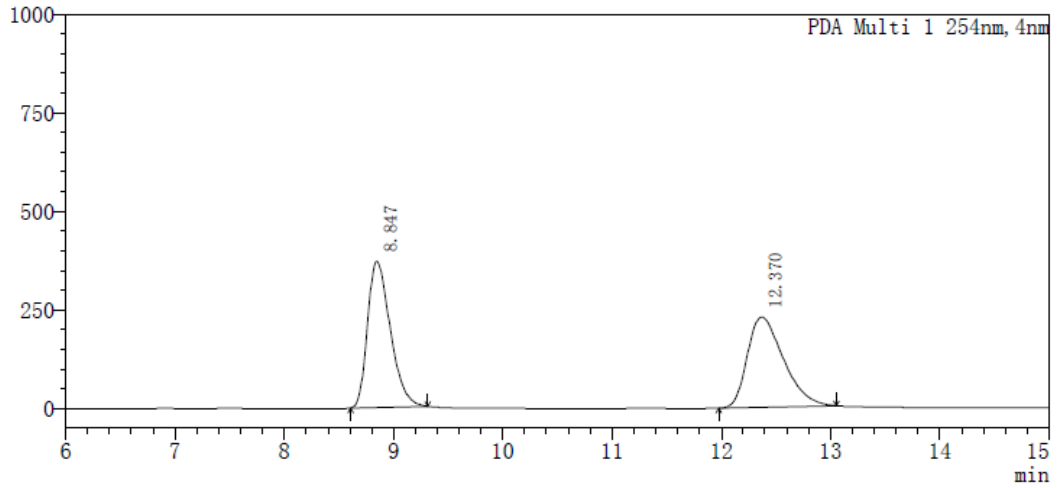

<峰表>

PDA Ch1 254nm

| 峰号 | 保留时间   | 面积       | 高度     | 化合物名 | 面积%     | 高度%     |
|----|--------|----------|--------|------|---------|---------|
| 1  | 8.847  | 5381753  | 371024 |      | 50.486  | 61.783  |
| 2  | 12.370 | 5278065  | 229500 |      | 49.514  | 38.217  |
| 总计 |        | 10659818 | 600524 |      | 100.000 | 100.000 |

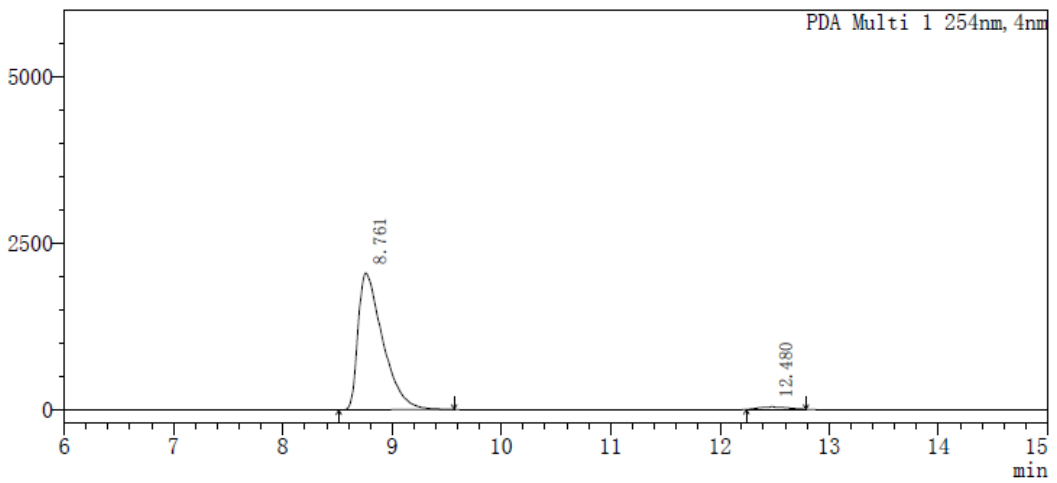

<峰表>

PDA Ch1 254nm

| 峰号 | 保留时间   | 面积       | 高度      | 化合物名 | 面积%     | 高度%     |
|----|--------|----------|---------|------|---------|---------|
| 1  | 8.761  | 32326458 | 2049509 |      | 98.001  | 98.247  |
| 2  | 12.480 | 659442   | 36563   |      | 1.999   | 1.753   |
| 总计 |        | 32985899 | 2086072 |      | 100.000 | 100.000 |

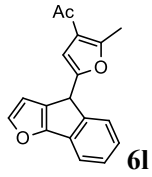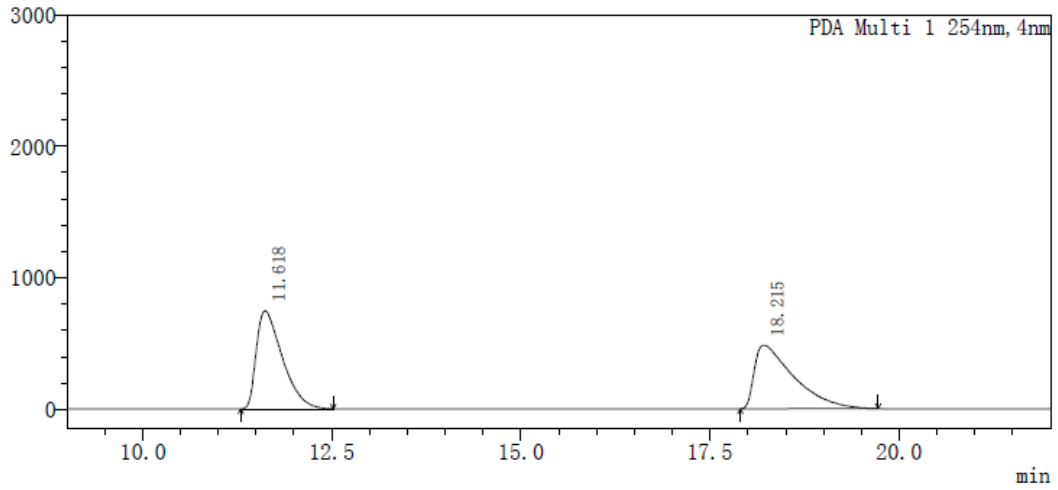

<峰表>

PDA Ch1 254nm

| 峰号 | 保留时间   | 面积       | 高度      | 化合物名 | 面积%     | 高度%     |
|----|--------|----------|---------|------|---------|---------|
| 1  | 11.618 | 17849740 | 746353  |      | 50.432  | 60.646  |
| 2  | 18.215 | 17543763 | 484322  |      | 49.568  | 39.354  |
| 总计 |        | 35393504 | 1230675 |      | 100.000 | 100.000 |

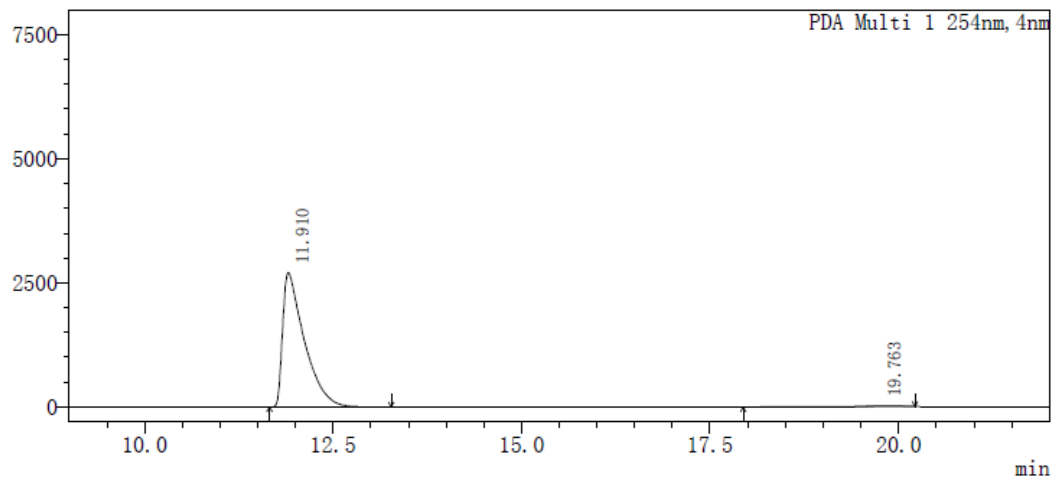

<峰表>

PDA Ch1 254nm

| 峰号 | 保留时间   | 面积       | 高度      | 化合物名 | 面积%     | 高度%     |
|----|--------|----------|---------|------|---------|---------|
| 1  | 11.910 | 54095626 | 2701619 |      | 99.488  | 99.356  |
| 2  | 19.763 | 278481   | 17522   |      | 0.512   | 0.644   |
| 总计 |        | 54374107 | 2719141 |      | 100.000 | 100.000 |

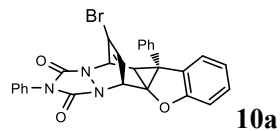

mAU

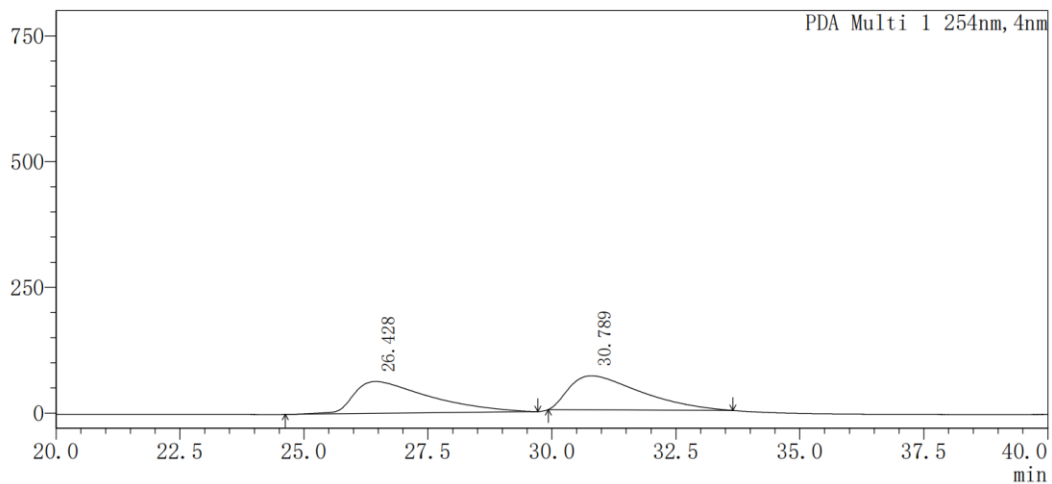

<峰表>

PDA Ch1 254nm

| 峰号 | 保留时间   | 面积       | 高度     | 面积%     | 高度%     |
|----|--------|----------|--------|---------|---------|
| 1  | 26.428 | 6723481  | 63339  | 49.552  | 48.359  |
| 2  | 30.789 | 6844931  | 67639  | 50.448  | 51.641  |
| 总计 |        | 13568412 | 130977 | 100.000 | 100.000 |

mAU

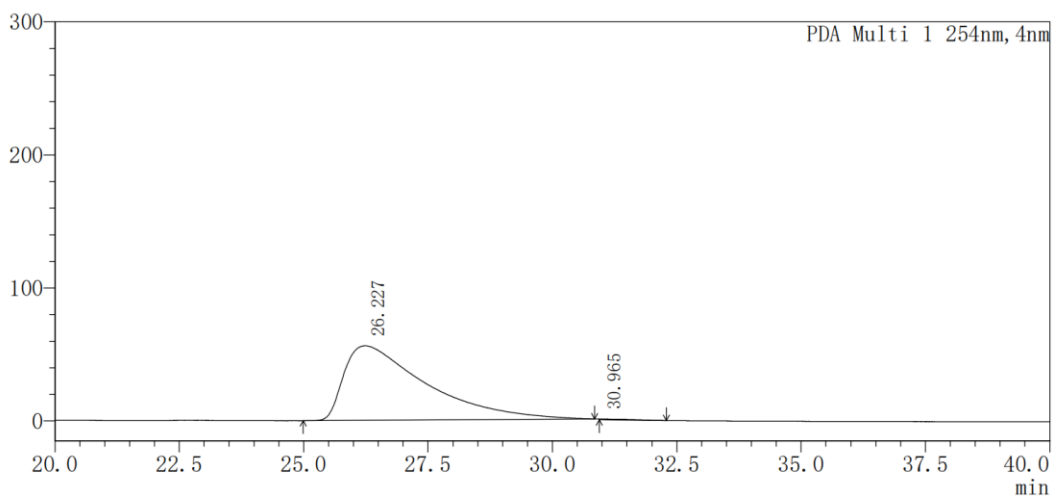

<峰表>

PDA Ch1 254nm

| 峰号 | 保留时间   | 面积      | 高度    | 面积%     | 高度%     |
|----|--------|---------|-------|---------|---------|
| 1  | 26.227 | 6425231 | 56103 | 99.527  | 98.939  |
| 2  | 30.965 | 30546   | 601   | 0.473   | 1.061   |
| 总计 |        | 6455777 | 56704 | 100.000 | 100.000 |

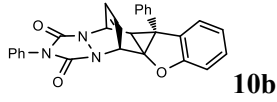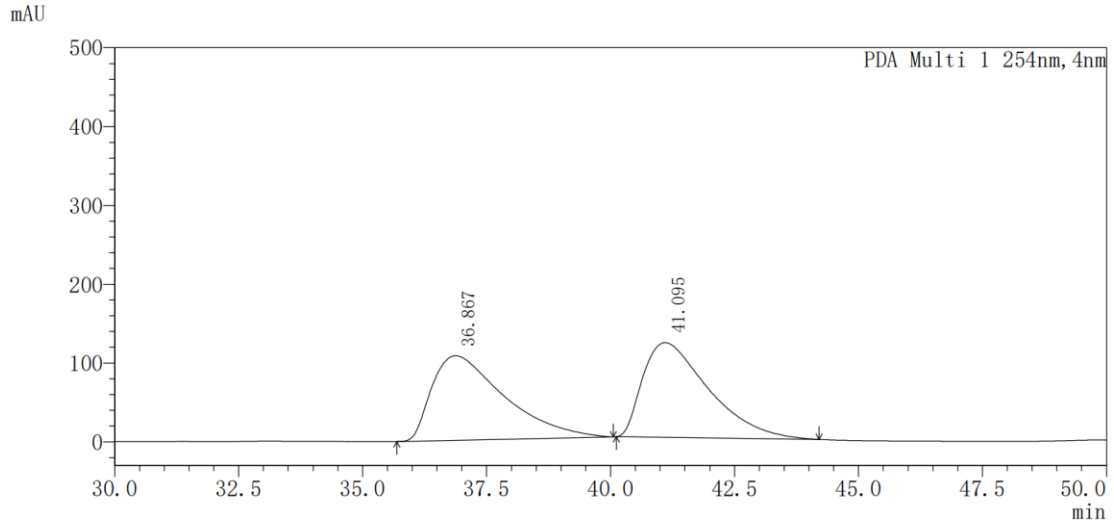

<峰表>

PDA Ch1 254nm

| 峰号 | 保留时间   | 面积       | 高度     | 面积%     | 高度%     |
|----|--------|----------|--------|---------|---------|
| 1  | 36.867 | 10878011 | 107290 | 49.533  | 47.155  |
| 2  | 41.095 | 11082954 | 120237 | 50.467  | 52.845  |
| 总计 |        | 21960965 | 227526 | 100.000 | 100.000 |

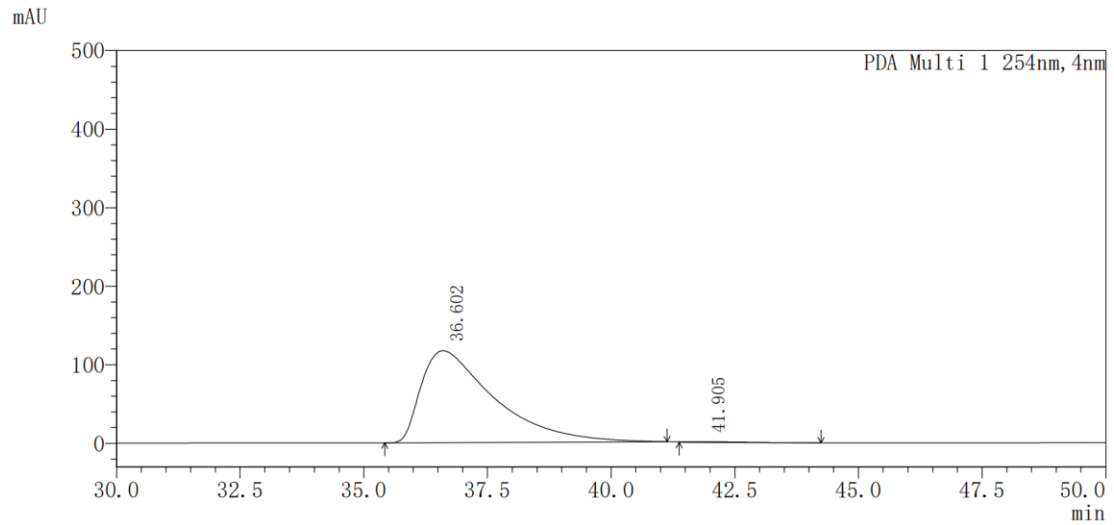

<峰表>

PDA Ch1 254nm

| 峰号 | 保留时间   | 面积       | 高度     | 面积%     | 高度%     |
|----|--------|----------|--------|---------|---------|
| 1  | 36.602 | 11997841 | 116955 | 99.414  | 99.344  |
| 2  | 41.905 | 70767    | 772    | 0.586   | 0.656   |
| 总计 |        | 12068608 | 117727 | 100.000 | 100.000 |

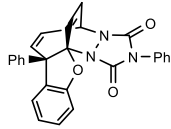

**11a**

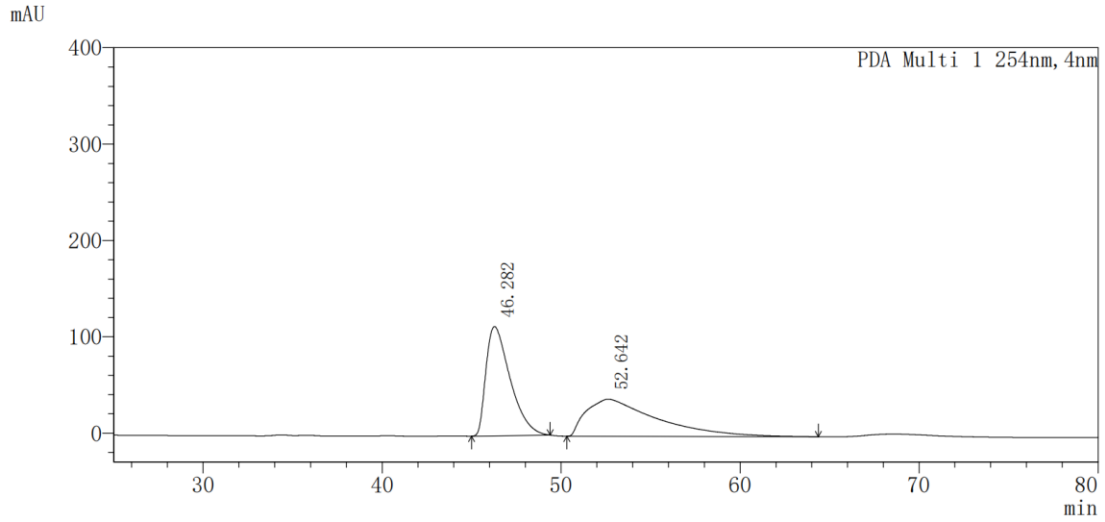

<峰表>

PDA Ch1 254nm

| 峰号 | 保留时间   | 面积       | 高度     | 面积%     | 高度%     |
|----|--------|----------|--------|---------|---------|
| 1  | 46.282 | 10659504 | 113358 | 50.291  | 74.650  |
| 2  | 52.642 | 10536147 | 38495  | 49.709  | 25.350  |
| 总计 |        | 21195651 | 151853 | 100.000 | 100.000 |

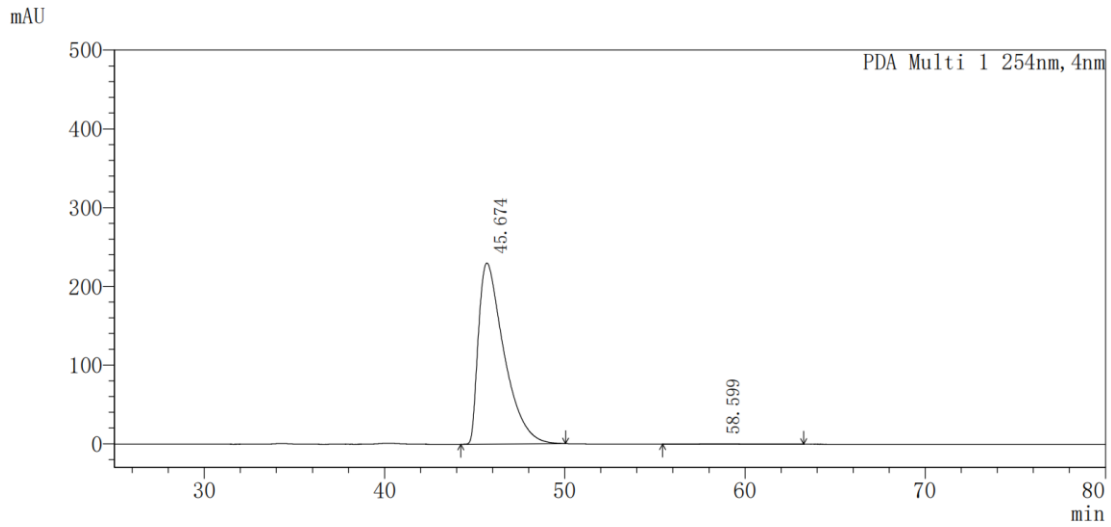

<峰表>

PDA Ch1 254nm

| 峰号 | 保留时间   | 面积       | 高度     | 面积%     | 高度%     |
|----|--------|----------|--------|---------|---------|
| 1  | 45.674 | 22664478 | 230094 | 99.615  | 99.816  |
| 2  | 58.599 | 87508    | 423    | 0.385   | 0.184   |
| 总计 |        | 22751986 | 230517 | 100.000 | 100.000 |



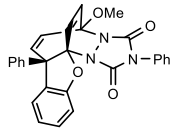

**11b**

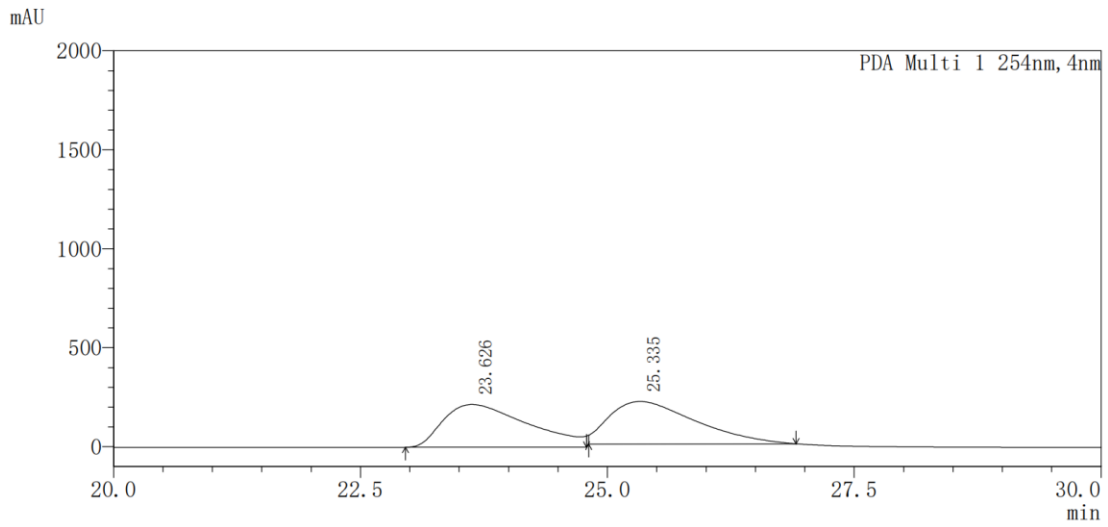

<峰表>

PDA Ch1 254nm

| 峰号 | 保留时间   | 面积       | 高度     | 面积%     | 高度%     |
|----|--------|----------|--------|---------|---------|
| 1  | 23.626 | 12945635 | 215385 | 49.405  | 49.976  |
| 2  | 25.335 | 13257243 | 215592 | 50.595  | 50.024  |
| 总计 |        | 26202878 | 430977 | 100.000 | 100.000 |

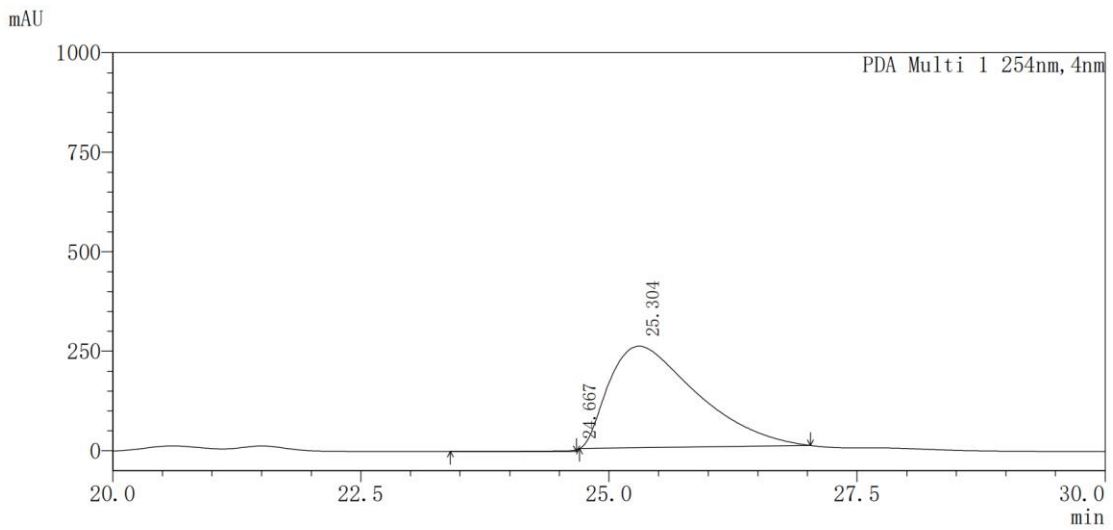

<峰表>

PDA Ch1 254nm

| 峰号 | 保留时间   | 面积       | 高度     | 面积%     | 高度%     |
|----|--------|----------|--------|---------|---------|
| 1  | 24.667 | 52310    | 3761   | 0.331   | 1.452   |
| 2  | 25.304 | 15754694 | 255204 | 99.669  | 98.548  |
| 总计 |        | 15807004 | 258966 | 100.000 | 100.000 |

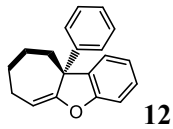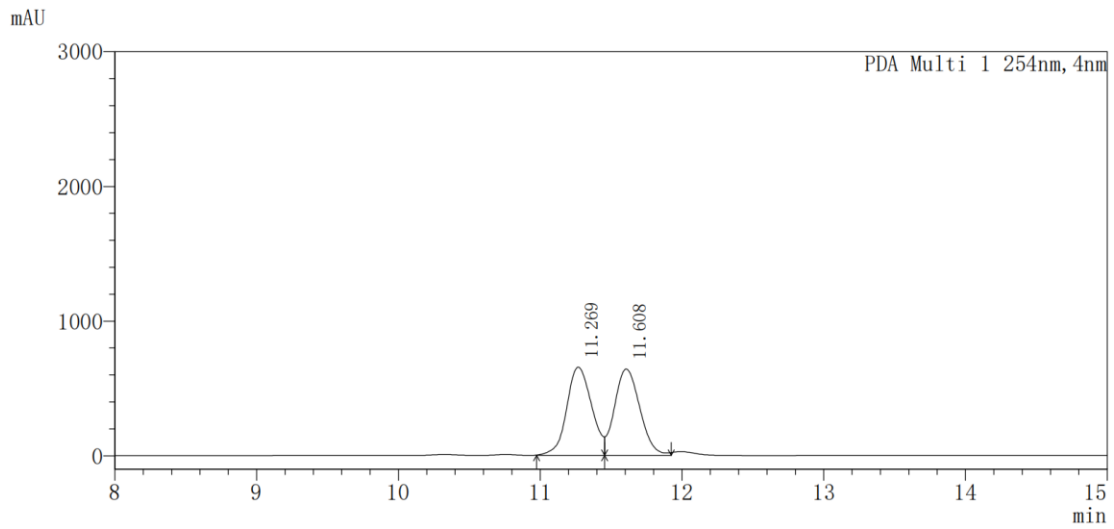

<峰表>

PDA Ch1 254nm

| 峰号 | 保留时间   | 面积       | 高度      | 面积%     | 高度%     |
|----|--------|----------|---------|---------|---------|
| 1  | 11.269 | 8069011  | 654119  | 50.523  | 50.485  |
| 2  | 11.608 | 7902077  | 641553  | 49.477  | 49.515  |
| 总计 |        | 15971088 | 1295672 | 100.000 | 100.000 |

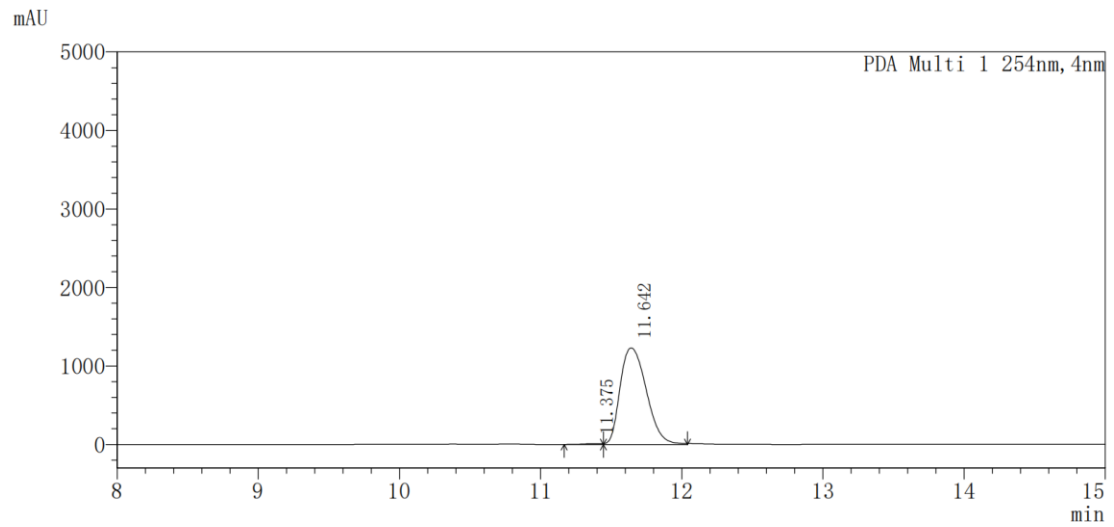

<峰表>

PDA Ch1 254nm

| 峰号 | 保留时间   | 面积       | 高度      | 面积%     | 高度%     |
|----|--------|----------|---------|---------|---------|
| 1  | 11.375 | 96914    | 10119   | 0.606   | 0.816   |
| 2  | 11.642 | 15884787 | 1229933 | 99.394  | 99.184  |
| 总计 |        | 15981701 | 1240052 | 100.000 | 100.000 |
